# Supplementary material
Source: MDPI journal article supplement (https://www.mdpi.com/search?q=ijms-13-14813)
Supplement: s001 [file ijms-13-14813-s001.pdf]

Putative pol III type 3 transcription units identified by COMPASSS

| CHR | PROMOTERS | Direction | position in Contig | from     | to       | Position in chromosome | Length | TATA distance | poly-T distance |
|-----|-----------|-----------|--------------------|----------|----------|------------------------|--------|---------------|-----------------|
|     |           |           | NT_039169.7 (1)    |          |          |                        |        |               |                 |
| 1   | 0         | 5'-3'     | 811630             | 811630   | 812004   | 3.811.630              | 374    | 10            | 364             |
|     | 1         | 5'-3'     | 1590858            | 1590858  | 1591301  | 4.590.858              | 443    | 24            | 419             |
|     | 2         | 5'-3'     | 1994160            | 1994160  | 1994497  | 4.994.160              | 337    | 6             | 327             |
|     | 3         | 5'-3'     | 6527800            | 6527800  | 6528025  | 9.527.800              | 225    | 10            | 215             |
|     | 4         | 5'-3'     | 8682780            | 8682780  | 8683043  | 11.682.780             | 263    | 16            | 253             |
|     | 5         | 5'-3'     | 8745619            | 8745619  | 8745996  | 11.745.619             | 377    | 13            | 367             |
|     | 6         | 5'-3'     | 11727442           | 11727442 | 11728016 | 14.727.442             | 574    | 28            | 564             |
|     | 7         | 5'-3'     | 14263375           | 14263375 | 14263763 | 17.263.375             | 388    | 12            | 378             |
|     | 8         | 5'-3'     | 16442270           | 16442270 | 16442708 | 19.442.270             | 438    | 12            | 428             |
|     | 9         | 5'-3'     | 18841135           | 18841135 | 18841497 | 21.841.135             | 362    | 26            | 352             |
|     | 10        | 3'-5'     | 2775186            | 2775382  | 2775819  | 5.775.186              | 437    | 20            | 427             |
|     | 11        | 3'-5'     | 3993842            | 3994000  | 3994475  | 6.993.842              | 475    | 24            | 465             |
|     | 12        | 3'-5'     | 6596021            | 6596163  | 6596654  | 9.596.021              | 491    | 8             | 481             |
|     | 13        | 3'-5'     | 7061605            | 7061823  | 7062238  | 10.061.605             | 415    | 6             | 405             |
|     | 14        | 3'-5'     | 7105421            | 7105466  | 7106054  | 10.105.421             | 588    | 21            | 578             |
|     | 15        | 3'-5'     | 13717998           | 13718323 | 13718631 | 16.717.998             | 308    | 18            | 298             |
|     | 16        | 3'-5'     | 16915979           | 16916131 | 16916612 | 19.915.979             | 481    | 9             | 471             |
|     | 17        | 3'-5'     | 16942929           | 16943195 | 16943562 | 19.942.929             | 367    | 27            | 357             |
|     | 18        | 3'-5'     | 17101314           | 17101456 | 17101947 | 20.101.314             | 491    | 30            | 481             |
|     |           |           | NT_039170.7 (2)    |          |          |                        |        |               |                 |
|     | 19        | 5'-3'     | 2321295            | 2321295  | 2321704  | 24.794.644             | 409    | 20            | 399             |
|     | 20        | 5'-3'     | 2528703            | 2528703  | 2529112  | 25.002.052             | 409    | 10            | 399             |
|     | 21        | 5'-3'     | 5830337            | 5830337  | 5830706  | 28.303.686             | 369    | 15            | 359             |
|     | 22        | 5'-3'     | 5958024            | 5958024  | 5958404  | 28.431.373             | 380    | 21            | 370             |
|     | 23        | 5'-3'     | 6171558            | 6171558  | 6171882  | 28.644.907             | 324    | 10            | 314             |
|     | 24        | 5'-3'     | 6908469            | 6908469  | 6908796  | 29.381.818             | 327    | 29            | 317             |
|     | 25        | 5'-3'     | 7205589            | 7205589  | 7205841  | 29.678.938             | 252    | 11            | 242             |
|     | 26        | 5'-3'     | 13983077           | 13983077 | 13983552 | 36.456.426             | 475    | 14            | 465             |
|     | 27        | 5'-3'     | 15852248           | 15852248 | 15852385 | 38.325.597             | 137    | 20            | 127             |
|     | 28        | 5'-3'     | 18627231           | 18627231 | 18627507 | 41.100.580             | 276    | 27            | 266             |
|     | 29        | 5'-3'     | 24419418           | 24419418 | 24419808 | 46.892.767             | 390    | 18            | 380             |

|    |       |          |          |          |            |     |    |     |
|----|-------|----------|----------|----------|------------|-----|----|-----|
| 30 | 5'-3' | 25983641 | 25983641 | 25983995 | 48.456.990 | 354 | 24 | 344 |
| 31 | 5'-3' | 26669680 | 26669680 | 26670120 | 49.143.029 | 440 | 12 | 430 |
| 32 | 5'-3' | 28431149 | 28431149 | 28431527 | 50.904.498 | 378 | 27 | 368 |
| 33 | 5'-3' | 28758146 | 28758146 | 28758471 | 51.231.495 | 325 | 7  | 315 |
| 34 | 5'-3' | 30187775 | 30187775 | 30188240 | 52.661.124 | 465 | 8  | 455 |
| 35 | 5'-3' | 30350985 | 30350985 | 30351229 | 52.824.334 | 244 | 16 | 234 |
| 36 | 5'-3' | 32095500 | 32095500 | 32095893 | 54.568.849 | 393 | 12 | 383 |
| 37 | 5'-3' | 35865919 | 35865919 | 35866135 | 58.339.268 | 216 | 8  | 206 |
| 38 | 5'-3' | 36902354 | 36902354 | 36902770 | 59.375.703 | 416 | 28 | 406 |
| 39 | 5'-3' | 43027177 | 43027177 | 43027573 | 65.500.526 | 396 | 30 | 386 |
| 40 | 5'-3' | 46302959 | 46302959 | 46303204 | 68.776.308 | 245 | 17 | 235 |
| 41 | 5'-3' | 46550222 | 46550222 | 46550594 | 69.023.571 | 372 | 28 | 362 |
| 42 | 5'-3' | 47391807 | 47391807 | 47392125 | 69.865.156 | 318 | 21 | 308 |
| 43 | 5'-3' | 48135554 | 48135554 | 48135906 | 70.608.903 | 352 | 16 | 342 |
| 44 | 5'-3' | 51000544 | 51000544 | 51000878 | 73.473.893 | 334 | 6  | 324 |
| 45 | 5'-3' | 52611028 | 52611028 | 52611561 | 75.084.377 | 533 | 25 | 523 |
| 46 | 3'-5' | 733065   | 733348   | 733698   | 23.206.414 | 350 | 8  | 340 |
| 47 | 3'-5' | 1287475  | 1287756  | 1288108  | 23.760.824 | 352 | 9  | 342 |
| 48 | 3'-5' | 2979625  | 2979823  | 2980258  | 25.452.974 | 435 | 7  | 425 |
| 49 | 3'-5' | 3016427  | 3016673  | 3017060  | 25.489.776 | 387 | 13 | 377 |
| 50 | 3'-5' | 6436601  | 6436869  | 6437234  | 28.909.950 | 365 | 21 | 355 |
| 51 | 3'-5' | 7071324  | 7071373  | 7071957  | 29.544.673 | 584 | 12 | 574 |
| 52 | 3'-5' | 9696594  | 9696842  | 9697227  | 32.169.943 | 385 | 32 | 375 |
| 53 | 3'-5' | 10282017 | 10282408 | 10282650 | 32.755.366 | 242 | 11 | 232 |
| 54 | 3'-5' | 15798536 | 15798799 | 15799169 | 38.271.885 | 370 | 32 | 360 |
| 55 | 3'-5' | 17070954 | 17071413 | 17071587 | 39.544.303 | 174 | 15 | 164 |
| 56 | 3'-5' | 19957482 | 19957740 | 19958115 | 42.430.831 | 375 | 26 | 365 |
| 57 | 3'-5' | 23377182 | 23377417 | 23377815 | 45.850.531 | 398 | 26 | 388 |
| 58 | 3'-5' | 25395628 | 25395990 | 25396261 | 47.868.977 | 271 | 22 | 261 |
| 59 | 3'-5' | 26530408 | 26530420 | 26531041 | 49.003.757 | 621 | 16 | 611 |
| 60 | 3'-5' | 27896063 | 27896345 | 27896696 | 50.369.412 | 351 | 30 | 341 |
| 61 | 3'-5' | 29834518 | 29834826 | 29835151 | 52.307.867 | 325 | 15 | 315 |
| 62 | 3'-5' | 33343144 | 33343409 | 33343777 | 55.816.493 | 368 | 27 | 358 |
| 63 | 3'-5' | 35580167 | 35580564 | 35580800 | 58.053.516 | 236 | 34 | 226 |
| 64 | 3'-5' | 36114049 | 36114100 | 36114682 | 58.587.398 | 582 | 20 | 572 |
| 65 | 3'-5' | 38261440 | 38261772 | 38262073 | 60.734.789 | 301 | 17 | 291 |
| 66 | 3'-5' | 38784565 | 38784843 | 38785198 | 61.257.914 | 355 | 11 | 345 |

|                 |       |          |          |          |             |     |    |     |
|-----------------|-------|----------|----------|----------|-------------|-----|----|-----|
| 67              | 3'-5' | 43504822 | 43505085 | 43505455 | 65.978.171  | 370 | 20 | 360 |
| 68              | 3'-5' | 46555208 | 46555446 | 46555841 | 69.028.557  | 395 | 30 | 385 |
| NT_039173.7 (3) |       |          |          |          |             |     |    |     |
| 69              | 5'-3' | 5437836  | 5437836  | 5438165  | 80.555.966  | 329 | 18 | 319 |
| 70              | 5'-3' | 5965367  | 5965367  | 5965771  | 81.083.497  | 404 | 23 | 394 |
| 71              | 3'-5' | 1290490  | 1290735  | 1291123  | 76.408.620  | 388 | 29 | 378 |
| 72              | 3'-5' | 1561011  | 1561099  | 1561644  | 76.679.141  | 545 | 16 | 535 |
| 73              | 3'-5' | 6899658  | 6899899  | 6900291  | 82.017.788  | 392 | 33 | 382 |
| 74              | 3'-5' | 8171212  | 8171510  | 8171845  | 83.289.342  | 335 | 25 | 325 |
| 75              | 3'-5' | 8503212  | 8503341  | 8503845  | 83.621.342  | 504 | 25 | 494 |
| 76              | 3'-5' | 8969319  | 8969787  | 8969952  | 84.087.449  | 165 | 17 | 155 |
| 77              | 3'-5' | 9073329  | 9073513  | 9073962  | 84.191.459  | 449 | 10 | 439 |
| NT_078297.6 (4) |       |          |          |          |             |     |    |     |
| 78              | 5'-3' | 3018007  | 3018007  | 3018392  | 90.361.685  | 385 | 9  | 375 |
| 79              | 5'-3' | 11135600 | 11135600 | 11135948 | 98.479.278  | 348 | 26 | 338 |
| 80              | 5'-3' | 11142270 | 11142270 | 11142653 | 98.485.948  | 383 | 19 | 373 |
| 81              | 5'-3' | 11796126 | 11796126 | 11796480 | 99.139.804  | 354 | 17 | 344 |
| 82              | 5'-3' | 13530919 | 13530919 | 13531318 | 100.874.597 | 399 | 7  | 389 |
| 83              | 5'-3' | 16982707 | 16982707 | 16983089 | 104.326.385 | 382 | 6  | 372 |
| 84              | 5'-3' | 17466868 | 17466868 | 17467266 | 104.810.546 | 398 | 14 | 388 |
| 85              | 5'-3' | 20279056 | 20279056 | 20279479 | 107.622.734 | 423 | 16 | 413 |
| 86              | 5'-3' | 24249506 | 24249506 | 24249866 | 111.593.184 | 360 | 10 | 350 |
| 87              | 5'-3' | 25354694 | 25354694 | 25355031 | 112.698.372 | 337 | 18 | 327 |
| 88              | 5'-3' | 26430227 | 26430227 | 26430607 | 113.773.905 | 380 | 27 | 370 |
| 89              | 5'-3' | 29015781 | 29015781 | 29016309 | 116.359.459 | 528 | 26 | 518 |
| 90              | 5'-3' | 30090610 | 30090610 | 30091082 | 117.434.288 | 472 | 14 | 462 |
| 91              | 5'-3' | 31168397 | 31168397 | 31168792 | 118.512.075 | 395 | 9  | 385 |
| 92              | 5'-3' | 31662105 | 31662105 | 31662454 | 119.005.783 | 349 | 7  | 339 |
| 93              | 5'-3' | 39253637 | 39253637 | 39253916 | 126.597.315 | 279 | 23 | 269 |
| 94              | 5'-3' | 42402246 | 42402246 | 42402461 | 129.745.924 | 215 | 26 | 205 |
| 95              | 5'-3' | 44161218 | 44161218 | 44161595 | 131.504.896 | 377 | 16 | 367 |
| 96              | 5'-3' | 44344146 | 44344146 | 44344545 | 131.687.824 | 399 | 17 | 389 |
| 97              | 5'-3' | 46091036 | 46091036 | 46091336 | 133.434.714 | 300 | 16 | 290 |
| 98              | 5'-3' | 57318427 | 57318427 | 57318842 | 144.662.105 | 415 | 11 | 405 |
| 99              | 5'-3' | 59384901 | 59384901 | 59385248 | 146.728.579 | 347 | 25 | 337 |

|     |       |          |          |          |             |     |    |     |
|-----|-------|----------|----------|----------|-------------|-----|----|-----|
| 100 | 5'-3' | 60198016 | 60198016 | 60198365 | 147.541.694 | 349 | 6  | 339 |
| 101 | 5'-3' | 60586519 | 60586519 | 60586740 | 147.930.197 | 221 | 18 | 211 |
| 102 | 5'-3' | 61219018 | 61219018 | 61219404 | 148.562.696 | 386 | 24 | 376 |
| 103 | 5'-3' | 61781610 | 61781610 | 61782037 | 149.125.288 | 427 | 7  | 417 |
| 104 | 5'-3' | 67124785 | 67124785 | 67125070 | 154.468.463 | 285 | 6  | 275 |
| 105 | 5'-3' | 67268125 | 67268125 | 67268513 | 154.611.803 | 388 | 8  | 378 |
| 106 | 3'-5' | 807011   | 807262   | 807644   | 88.150.689  | 382 | 17 | 372 |
| 107 | 3'-5' | 1149767  | 1150025  | 1150400  | 88.493.445  | 375 | 24 | 365 |
| 108 | 3'-5' | 2068443  | 2068559  | 2069076  | 89.412.121  | 517 | 12 | 507 |
| 109 | 3'-5' | 7831391  | 7831645  | 7832024  | 95.175.069  | 379 | 33 | 369 |
| 110 | 3'-5' | 10583143 | 10583364 | 10583776 | 97.926.821  | 412 | 16 | 402 |
| 111 | 3'-5' | 12274852 | 12275195 | 12275485 | 99.618.530  | 290 | 14 | 280 |
| 112 | 3'-5' | 15008747 | 15008994 | 15009380 | 102.352.425 | 386 | 34 | 376 |
| 113 | 3'-5' | 16341922 | 16342159 | 16342555 | 103.685.600 | 396 | 19 | 386 |
| 114 | 3'-5' | 16759953 | 16760109 | 16760586 | 104.103.631 | 477 | 27 | 467 |
| 115 | 3'-5' | 17188436 | 17188692 | 17189069 | 104.532.114 | 377 | 26 | 367 |
| 116 | 3'-5' | 20700743 | 20701065 | 20701376 | 108.044.421 | 311 | 25 | 301 |
| 117 | 3'-5' | 22525041 | 22525297 | 22525674 | 109.868.719 | 377 | 9  | 367 |
| 118 | 3'-5' | 22529493 | 22529746 | 22530126 | 109.873.171 | 380 | 27 | 370 |
| 119 | 3'-5' | 23014579 | 23014909 | 23015212 | 110.358.257 | 303 | 7  | 293 |
| 120 | 3'-5' | 23628453 | 23628709 | 23629086 | 110.972.131 | 377 | 22 | 367 |
| 121 | 3'-5' | 24070316 | 24070484 | 24070949 | 111.413.994 | 465 | 11 | 455 |
| 122 | 3'-5' | 24138116 | 24138372 | 24138749 | 111.481.794 | 377 | 21 | 367 |
| 123 | 3'-5' | 25682715 | 25683036 | 25683348 | 113.026.393 | 312 | 6  | 302 |
| 124 | 3'-5' | 26999357 | 26999589 | 26999990 | 114.343.035 | 401 | 28 | 391 |
| 125 | 3'-5' | 31066775 | 31067075 | 31067408 | 118.410.453 | 333 | 6  | 323 |
| 126 | 3'-5' | 31771799 | 31771864 | 31772432 | 119.115.477 | 568 | 11 | 558 |
| 127 | 3'-5' | 32212262 | 32212474 | 32212895 | 119.555.940 | 421 | 24 | 411 |
| 128 | 3'-5' | 35377252 | 35377411 | 35377885 | 122.720.930 | 474 | 22 | 464 |
| 129 | 3'-5' | 36193419 | 36193675 | 36194052 | 123.537.097 | 377 | 28 | 367 |
| 130 | 3'-5' | 37305811 | 37306086 | 37306444 | 124.649.489 | 358 | 13 | 348 |
| 131 | 3'-5' | 38292184 | 38292657 | 38292817 | 125.635.862 | 160 | 24 | 150 |
| 132 | 3'-5' | 38529533 | 38529624 | 38530166 | 125.873.211 | 542 | 6  | 532 |
| 133 | 3'-5' | 43621838 | 43622025 | 43622471 | 130.965.516 | 446 | 17 | 436 |
| 134 | 3'-5' | 44117705 | 44117941 | 44118338 | 131.461.383 | 397 | 21 | 387 |
| 135 | 3'-5' | 48917795 | 48918044 | 48918428 | 136.261.473 | 384 | 22 | 374 |
| 136 | 3'-5' | 59860433 | 59860679 | 59861066 | 147.204.111 | 387 | 15 | 377 |

|     |       |          |          |          |             |     |    |     |
|-----|-------|----------|----------|----------|-------------|-----|----|-----|
| 137 | 3'-5' | 59896121 | 59896408 | 59896754 | 147.239.799 | 346 | 9  | 336 |
| 138 | 3'-5' | 60774502 | 60774761 | 60775135 | 148.118.180 | 374 | 26 | 364 |
| 139 | 3'-5' | 61042288 | 61042662 | 61042921 | 148.385.966 | 259 | 21 | 249 |
| 140 | 3'-5' | 62136759 | 62137043 | 62137392 | 149.480.437 | 349 | 20 | 339 |
| 141 | 3'-5' | 63584931 | 63585226 | 63585564 | 150.928.609 | 338 | 22 | 328 |
| 142 | 3'-5' | 65170791 | 65170916 | 65171424 | 152.514.469 | 508 | 11 | 498 |
| 143 | 3'-5' | 65484878 | 65485171 | 65485511 | 152.828.556 | 340 | 19 | 330 |
| 144 | 3'-5' | 66413318 | 66413427 | 66413951 | 153.756.996 | 524 | 18 | 514 |
| 145 | 3'-5' | 67202457 | 67202796 | 67203090 | 154.546.135 | 294 | 17 | 284 |

NT\_039185.7 (5)

|     |       |          |          |          |             |     |    |     |
|-----|-------|----------|----------|----------|-------------|-----|----|-----|
| 146 | 5'-3' | 2468491  | 2468491  | 2468813  | 160.567.364 | 322 | 22 | 312 |
| 147 | 5'-3' | 2776505  | 2776505  | 2776874  | 160.875.378 | 369 | 30 | 359 |
| 148 | 5'-3' | 3345383  | 3345383  | 3345665  | 161.444.256 | 282 | 22 | 272 |
| 149 | 5'-3' | 4925889  | 4925889  | 4926211  | 163.024.762 | 322 | 8  | 312 |
| 150 | 5'-3' | 7442654  | 7442654  | 7443074  | 165.541.527 | 420 | 19 | 410 |
| 151 | 5'-3' | 11498234 | 11498234 | 11498815 | 169.597.107 | 581 | 12 | 571 |
| 152 | 5'-3' | 14964037 | 14964037 | 14964345 | 173.062.910 | 308 | 31 | 298 |
| 153 | 5'-3' | 15586549 | 15586549 | 15587072 | 173.685.422 | 523 | 10 | 513 |
| 154 | 5'-3' | 15683228 | 15683228 | 15683608 | 173.782.101 | 380 | 10 | 370 |
| 155 | 5'-3' | 17056439 | 17056439 | 17056916 | 175.155.312 | 477 | 9  | 467 |
| 156 | 5'-3' | 17099038 | 17099038 | 17099368 | 175.197.911 | 330 | 24 | 320 |
| 157 | 5'-3' | 17925122 | 17925122 | 17925369 | 176.023.995 | 247 | 21 | 237 |
| 158 | 5'-3' | 18068331 | 18068331 | 18068753 | 176.167.204 | 422 | 23 | 412 |
| 159 | 5'-3' | 18894849 | 18894849 | 18895211 | 176.993.722 | 362 | 9  | 352 |
| 160 | 5'-3' | 19947673 | 19947673 | 19948045 | 178.046.546 | 372 | 9  | 362 |
| 161 | 5'-3' | 20231069 | 20231069 | 20231504 | 178.329.942 | 435 | 12 | 425 |
| 162 | 5'-3' | 21743378 | 21743378 | 21743783 | 179.842.251 | 405 | 7  | 395 |
| 163 | 5'-3' | 22059497 | 22059497 | 22059726 | 180.158.370 | 229 | 13 | 219 |
| 164 | 5'-3' | 22227748 | 22227748 | 22228189 | 180.326.621 | 441 | 13 | 431 |
| 165 | 5'-3' | 23323055 | 23323055 | 23323443 | 181.421.928 | 388 | 28 | 378 |
| 166 | 3'-5' | 1364423  | 1364656  | 1365056  | 159.463.296 | 400 | 8  | 390 |
| 167 | 3'-5' | 1574783  | 1574986  | 1575416  | 159.673.656 | 430 | 12 | 420 |
| 168 | 3'-5' | 1841968  | 1842351  | 1842601  | 159.940.841 | 250 | 28 | 240 |
| 169 | 3'-5' | 2142679  | 2142690  | 2143312  | 160.241.552 | 622 | 28 | 612 |
| 170 | 3'-5' | 3345686  | 3345948  | 3346319  | 161.444.559 | 371 | 30 | 361 |
| 171 | 3'-5' | 4159283  | 4159558  | 4159916  | 162.258.156 | 358 | 15 | 348 |

|     |       |          |          |          |             |     |    |     |
|-----|-------|----------|----------|----------|-------------|-----|----|-----|
| 172 | 3'-5' | 5403637  | 5403775  | 5404270  | 163.502.510 | 495 | 30 | 485 |
| 173 | 3'-5' | 8040034  | 8040263  | 8040667  | 166.138.907 | 404 | 6  | 394 |
| 174 | 3'-5' | 12749459 | 12749742 | 12750092 | 170.848.332 | 350 | 34 | 340 |
| 175 | 3'-5' | 17478722 | 17478997 | 17479355 | 175.577.595 | 358 | 30 | 348 |
| 176 | 3'-5' | 18253598 | 18253775 | 18254231 | 176.352.471 | 456 | 20 | 446 |
| 177 | 3'-5' | 18275142 | 18275347 | 18275775 | 176.374.015 | 428 | 23 | 418 |
| 178 | 3'-5' | 23477539 | 23477936 | 23478172 | 181.576.412 | 236 | 22 | 226 |
| 179 | 3'-5' | 23898896 | 23899134 | 23899529 | 181.997.769 | 395 | 23 | 385 |
| 180 | 3'-5' | 25435080 | 25435364 | 25435713 | 183.533.953 | 349 | 24 | 339 |

NT\_039189.7 (6)

|     |       |         |         |         |             |     |    |     |
|-----|-------|---------|---------|---------|-------------|-----|----|-----|
| 181 | 5'-3' | 218012  | 218012  | 218442  | 185.545.822 | 430 | 9  | 420 |
| 182 | 5'-3' | 926385  | 926385  | 926846  | 186.254.195 | 461 | 13 | 451 |
| 183 | 5'-3' | 5012865 | 5012865 | 5013189 | 190.340.675 | 324 | 23 | 314 |
| 184 | 3'-5' | 92925   | 93066   | 93558   | 185.420.735 | 492 | 27 | 482 |
| 185 | 3'-5' | 3105530 | 3105783 | 3106163 | 188.433.340 | 380 | 16 | 370 |
| 186 | 3'-5' | 3132476 | 3132788 | 3133109 | 188.460.286 | 321 | 21 | 311 |
| 187 | 3'-5' | 4906910 | 4907138 | 4907543 | 190.234.720 | 405 | 7  | 395 |

NT\_039190.7 (7)

|     |       |         |         |         |             |     |    |     |
|-----|-------|---------|---------|---------|-------------|-----|----|-----|
| 188 | 5'-3' | 974477  | 974477  | 974693  | 194.850.134 | 216 | 24 | 206 |
| 189 | 3'-5' | 1602604 | 1602805 | 1603237 | 195.478.261 | 432 | 17 | 422 |

NT\_039202.7 (1)

|    |       |          |          |          |          |     |      |          |       |         |
|----|-------|----------|----------|----------|----------|-----|------|----------|-------|---------|
| 0  | 5'-3' | 1170630  | 1170630  | 1171221  | 4170630  | 591 | tata | Distance | colyt | Distanc |
| 1  | 5'-3' | 1885355  | 1885355  | 1885755  | 4885355  | 400 | 23   |          |       | 581     |
| 2  | 5'-3' | 6617614  | 6617614  | 6617775  | 9617614  | 161 | 24   |          |       | 390     |
| 3  | 5'-3' | 7671395  | 7671395  | 7671745  | 10671395 | 350 | 29   |          |       | 151     |
| 4  | 5'-3' | 8910816  | 8910816  | 8911326  | 11910816 | 510 | 28   |          |       | 340     |
| 5  | 5'-3' | 9247296  | 9247296  | 9247595  | 12247296 | 299 | 7    |          |       | 500     |
| 6  | 5'-3' | 9579109  | 9579109  | 9579464  | 12579109 | 355 | 30   |          |       | 289     |
| 7  | 5'-3' | 11488978 | 11488978 | 11489450 | 14488978 | 472 | 14   |          |       | 345     |
| 8  | 5'-3' | 11963053 | 11963053 | 11963307 | 14963053 | 254 | 26   |          |       | 462     |
| 9  | 5'-3' | 17355591 | 17355591 | 17355929 | 20355591 | 338 | 14   |          |       | 244     |
| 10 | 3'-5' | 3275100  | 3275274  | 3275733  | 6275100  | 459 | 11   |          |       | 328     |
| 11 | 3'-5' | 4347002  | 4347256  | 4347635  | 7347002  | 379 | 28   |          |       | 449     |
| 12 | 3'-5' | 5424072  | 5424360  | 5424705  | 8424072  | 345 | 34   |          |       | 369     |
|    |       |          |          |          |          |     | 29   |          |       | 335     |

|    |       |          |          |          |          |     |    |     |
|----|-------|----------|----------|----------|----------|-----|----|-----|
| 13 | 3'-5' | 5441498  | 5441746  | 5442131  | 8441498  | 385 | 9  | 375 |
| 14 | 3'-5' | 5625799  | 5626153  | 5626432  | 8625799  | 279 | 19 | 269 |
| 15 | 3'-5' | 12463920 | 12464184 | 12464553 | 15463920 | 369 | 26 | 359 |
| 16 | 3'-5' | 13332982 | 13333208 | 13333615 | 16332982 | 407 | 11 | 397 |
| 17 | 3'-5' | 13894723 | 13894942 | 13895356 | 16894723 | 414 | 28 | 404 |
| 18 | 3'-5' | 13896540 | 13896795 | 13897173 | 16896540 | 378 | 33 | 368 |
| 19 | 3'-5' | 15412400 | 15412719 | 15413033 | 18412400 | 314 | 14 | 304 |
| 20 | 3'-5' | 18122616 | 18122862 | 18123249 | 21122616 | 387 | 32 | 377 |
| 21 | 3'-5' | 18981057 | 18981287 | 18981690 | 21981057 | 403 | 11 | 393 |

NT\_039206.7 (2)

|    |       |          |          |          |          |     |    |     |
|----|-------|----------|----------|----------|----------|-----|----|-----|
| 22 | 5'-3' | 429346   | 429346   | 429697   | 22826598 | 351 | 26 | 341 |
| 23 | 5'-3' | 11643382 | 11643382 | 11643836 | 34040634 | 454 | 27 | 444 |
| 24 | 5'-3' | 11982916 | 11982916 | 11983213 | 34380168 | 297 | 21 | 287 |
| 25 | 5'-3' | 12675385 | 12675385 | 12675751 | 35072637 | 366 | 27 | 356 |
| 26 | 5'-3' | 16627156 | 16627156 | 16627630 | 39024408 | 474 | 20 | 464 |
| 27 | 5'-3' | 21011867 | 21011867 | 21012266 | 43409119 | 399 | 10 | 389 |
| 28 | 5'-3' | 24283655 | 24283655 | 24283945 | 46680907 | 290 | 29 | 280 |
| 29 | 5'-3' | 24433576 | 24433576 | 24433950 | 46830828 | 374 | 11 | 364 |
| 30 | 5'-3' | 24516869 | 24516869 | 24517302 | 46914121 | 433 | 22 | 423 |
| 31 | 5'-3' | 25022558 | 25022558 | 25023110 | 47419810 | 552 | 30 | 542 |
| 32 | 5'-3' | 25566796 | 25566796 | 25567125 | 47964048 | 329 | 12 | 319 |
| 33 | 5'-3' | 31388397 | 31388397 | 31388808 | 53785649 | 411 | 7  | 401 |
| 34 | 5'-3' | 33593125 | 33593125 | 33593511 | 55990377 | 386 | 30 | 376 |
| 35 | 5'-3' | 35391493 | 35391493 | 35391820 | 57788745 | 327 | 22 | 317 |
| 36 | 3'-5' | 4903447  | 4903872  | 4904080  | 27300699 | 208 | 30 | 198 |
| 37 | 3'-5' | 8178324  | 8178356  | 8178957  | 30575576 | 601 | 18 | 591 |
| 38 | 3'-5' | 13938937 | 13939178 | 13939570 | 36336189 | 392 | 31 | 382 |
| 39 | 3'-5' | 16966224 | 16966290 | 16966857 | 39363476 | 567 | 34 | 557 |
| 40 | 3'-5' | 20320821 | 20321163 | 20321454 | 42718073 | 291 | 17 | 281 |
| 41 | 3'-5' | 20383332 | 20383630 | 20383965 | 42780584 | 335 | 31 | 325 |
| 42 | 3'-5' | 20646212 | 20646493 | 20646845 | 43043464 | 352 | 32 | 342 |
| 43 | 3'-5' | 24011581 | 24011762 | 24012214 | 46408833 | 452 | 27 | 442 |
| 44 | 3'-5' | 24501459 | 24501757 | 24502092 | 46898711 | 335 | 11 | 325 |
| 45 | 3'-5' | 27032085 | 27032363 | 27032718 | 49429337 | 355 | 12 | 345 |
| 46 | 3'-5' | 28128630 | 28128664 | 28129263 | 50525882 | 599 | 29 | 589 |

|    |       |          |          |          |          |     |    |     |
|----|-------|----------|----------|----------|----------|-----|----|-----|
| 47 | 3'-5' | 29674453 | 29674764 | 29675086 | 52071705 | 322 | 29 | 312 |
| 48 | 3'-5' | 32119633 | 32119928 | 32120266 | 54516885 | 338 | 12 | 328 |

NT\_039207.7 (3)

|    |       |          |          |          |           |     |    |     |
|----|-------|----------|----------|----------|-----------|-----|----|-----|
| 49 | 5'-3' | 2352594  | 2352594  | 2352996  | 61311292  | 402 | 16 | 392 |
| 50 | 5'-3' | 6896480  | 6896480  | 6896745  | 65855178  | 265 | 8  | 255 |
| 51 | 5'-3' | 7714540  | 7714540  | 7714911  | 66673238  | 371 | 30 | 361 |
| 52 | 5'-3' | 11242540 | 11242540 | 11242925 | 70201238  | 385 | 19 | 375 |
| 53 | 5'-3' | 11597094 | 11597094 | 11597344 | 70555792  | 250 | 24 | 240 |
| 54 | 5'-3' | 13217594 | 13217594 | 13217975 | 72176292  | 381 | 9  | 371 |
| 55 | 5'-3' | 18864873 | 18864873 | 18865359 | 77823571  | 486 | 16 | 476 |
| 56 | 5'-3' | 19214284 | 19214284 | 19214679 | 78172982  | 395 | 11 | 385 |
| 57 | 5'-3' | 24201512 | 24201512 | 24202009 | 83160210  | 497 | 19 | 487 |
| 58 | 5'-3' | 26690966 | 26690966 | 26691177 | 85649664  | 211 | 9  | 201 |
| 59 | 5'-3' | 28223413 | 28223413 | 28223793 | 87182111  | 380 | 20 | 370 |
| 60 | 5'-3' | 28455454 | 28455454 | 28455880 | 87414152  | 426 | 30 | 416 |
| 61 | 5'-3' | 30050000 | 30050000 | 30050391 | 89008698  | 391 | 13 | 381 |
| 62 | 5'-3' | 30820532 | 30820532 | 30820978 | 89779230  | 446 | 29 | 436 |
| 63 | 5'-3' | 33273327 | 33273327 | 33273522 | 92232025  | 195 | 22 | 185 |
| 64 | 5'-3' | 39136879 | 39136879 | 39137236 | 98095577  | 357 | 6  | 347 |
| 65 | 5'-3' | 40863135 | 40863135 | 40863466 | 99821833  | 331 | 6  | 321 |
| 66 | 5'-3' | 43047480 | 43047480 | 43047813 | 102006178 | 333 | 9  | 323 |
| 67 | 5'-3' | 45313693 | 45313693 | 45313998 | 104272391 | 305 | 11 | 295 |
| 68 | 5'-3' | 47580897 | 47580897 | 47581285 | 106539595 | 388 | 10 | 378 |
| 69 | 5'-3' | 48272733 | 48272733 | 48273160 | 107231431 | 427 | 15 | 417 |
| 70 | 5'-3' | 48894075 | 48894075 | 48894493 | 107852773 | 418 | 12 | 408 |
| 71 | 5'-3' | 50212604 | 50212604 | 50212994 | 109171302 | 390 | 17 | 380 |
| 72 | 5'-3' | 50429210 | 50429210 | 50429496 | 109387908 | 286 | 12 | 276 |
| 73 | 5'-3' | 52198414 | 52198414 | 52198870 | 111157112 | 456 | 19 | 446 |
| 74 | 5'-3' | 56602457 | 56602457 | 56602740 | 115561155 | 283 | 29 | 273 |
| 75 | 5'-3' | 57869351 | 57869351 | 57869708 | 116828049 | 357 | 16 | 347 |
| 76 | 5'-3' | 59954530 | 59954530 | 59954944 | 118913228 | 414 | 15 | 404 |
| 77 | 5'-3' | 60423891 | 60423891 | 60424265 | 119382589 | 374 | 10 | 364 |
| 78 | 5'-3' | 62133947 | 62133947 | 62134330 | 121092645 | 383 | 15 | 373 |
| 79 | 5'-3' | 64758203 | 64758203 | 64758576 | 123716901 | 373 | 21 | 363 |
| 80 | 5'-3' | 69769192 | 69769192 | 69769567 | 128727890 | 375 | 15 | 365 |



|     |       |           |           |           |           |     |    |     |
|-----|-------|-----------|-----------|-----------|-----------|-----|----|-----|
| 81  | 5'-3' | 72032379  | 72032379  | 72032622  | 130991077 | 243 | 18 | 233 |
| 82  | 5'-3' | 81887753  | 81887753  | 81888152  | 140846451 | 399 | 17 | 389 |
| 83  | 5'-3' | 84374992  | 84374992  | 84375382  | 143333690 | 390 | 9  | 380 |
| 84  | 5'-3' | 84508006  | 84508006  | 84508197  | 143466704 | 191 | 14 | 181 |
| 85  | 5'-3' | 85570454  | 85570454  | 85570610  | 144529152 | 156 | 8  | 146 |
| 86  | 5'-3' | 95978399  | 95978399  | 95978792  | 154937097 | 393 | 17 | 383 |
| 87  | 5'-3' | 99469120  | 99469120  | 99469590  | 158427818 | 470 | 9  | 460 |
| 88  | 5'-3' | 99525716  | 99525716  | 99526041  | 158484414 | 325 | 26 | 315 |
| 89  | 5'-3' | 102626423 | 102626423 | 102626953 | 161585121 | 530 | 17 | 520 |
| 90  | 3'-5' | 1952148   | 1952155   | 1952781   | 60910846  | 626 | 26 | 616 |
| 91  | 3'-5' | 3116018   | 3116254   | 3116651   | 62074716  | 397 | 30 | 387 |
| 92  | 3'-5' | 7587468   | 7587783   | 7588101   | 66546166  | 318 | 7  | 308 |
| 93  | 3'-5' | 7595198   | 7595422   | 7595831   | 66553896  | 409 | 25 | 399 |
| 94  | 3'-5' | 7717751   | 7717944   | 7718384   | 66676449  | 440 | 20 | 430 |
| 95  | 3'-5' | 9416256   | 9416519   | 9416889   | 68374954  | 370 | 34 | 360 |
| 96  | 3'-5' | 9503896   | 9504128   | 9504529   | 68462594  | 401 | 11 | 391 |
| 97  | 3'-5' | 11384628  | 11384925  | 11385261  | 70343326  | 336 | 32 | 326 |
| 98  | 3'-5' | 15677270  | 15677523  | 15677903  | 74635968  | 380 | 32 | 370 |
| 99  | 3'-5' | 18568574  | 18568856  | 18569207  | 77527272  | 351 | 26 | 341 |
| 100 | 3'-5' | 18602623  | 18602771  | 18603256  | 77561321  | 485 | 20 | 475 |
| 101 | 3'-5' | 22546040  | 22546345  | 22546673  | 81504738  | 328 | 16 | 318 |
| 102 | 3'-5' | 22625413  | 22625774  | 22626046  | 81584111  | 272 | 14 | 262 |
| 103 | 3'-5' | 22995857  | 22996096  | 22996490  | 81954555  | 394 | 19 | 384 |
| 104 | 3'-5' | 26800572  | 26800921  | 26801205  | 85759270  | 284 | 11 | 274 |
| 105 | 3'-5' | 36239784  | 36239800  | 36240417  | 95198482  | 617 | 33 | 607 |
| 106 | 3'-5' | 37535118  | 37535343  | 37535751  | 96493816  | 408 | 12 | 398 |
| 107 | 3'-5' | 41085494  | 41085768  | 41086127  | 100044192 | 359 | 22 | 349 |
| 108 | 3'-5' | 42620570  | 42620814  | 42621203  | 101579268 | 389 | 11 | 379 |
| 109 | 3'-5' | 42933211  | 42933541  | 42933844  | 101891909 | 303 | 7  | 293 |
| 110 | 3'-5' | 47002297  | 47002517  | 47002930  | 105960995 | 413 | 20 | 403 |
| 111 | 3'-5' | 49125723  | 49125936  | 49126356  | 108084421 | 420 | 18 | 410 |
| 112 | 3'-5' | 55323935  | 55324201  | 55324568  | 114282633 | 367 | 8  | 357 |
| 113 | 3'-5' | 55901788  | 55902059  | 55902421  | 114860486 | 362 | 6  | 352 |
| 114 | 3'-5' | 60269706  | 60269999  | 60270339  | 119228404 | 340 | 16 | 330 |
| 115 | 3'-5' | 60814048  | 60814315  | 60814681  | 119772746 | 366 | 15 | 356 |
| 116 | 3'-5' | 62564282  | 62564511  | 62564915  | 121522980 | 404 | 23 | 394 |
| 117 | 3'-5' | 64114577  | 64114842  | 64115210  | 123073275 | 368 | 16 | 358 |

|     |       |           |           |           |           |     |    |     |
|-----|-------|-----------|-----------|-----------|-----------|-----|----|-----|
| 118 | 3'-5' | 70309400  | 70309827  | 70310033  | 129268098 | 206 | 6  | 196 |
| 119 | 3'-5' | 74442054  | 74442407  | 74442687  | 133400752 | 280 | 10 | 270 |
| 120 | 3'-5' | 75063892  | 75064321  | 75064525  | 134022590 | 204 | 7  | 194 |
| 121 | 3'-5' | 75579627  | 75580080  | 75580260  | 134538325 | 180 | 12 | 170 |
| 122 | 3'-5' | 83395519  | 83395809  | 83396152  | 142354217 | 343 | 10 | 333 |
| 123 | 3'-5' | 84002067  | 84002473  | 84002700  | 142960765 | 227 | 7  | 217 |
| 124 | 3'-5' | 93350031  | 93350337  | 93350664  | 152308729 | 327 | 33 | 317 |
| 125 | 3'-5' | 98133889  | 98134170  | 98134522  | 157092587 | 352 | 22 | 342 |
| 126 | 3'-5' | 98542697  | 98543004  | 98543330  | 157501395 | 326 | 26 | 316 |
| 127 | 3'-5' | 100939374 | 100939638 | 100940007 | 159898072 | 369 | 8  | 359 |
| 128 | 3'-5' | 102699207 | 102699353 | 102699840 | 161657905 | 487 | 32 | 477 |
| 129 | 3'-5' | 103590927 | 103591178 | 103591560 | 162549625 | 382 | 20 | 372 |
| 130 | 3'-5' | 104502665 | 104502903 | 104503298 | 163461363 | 395 | 22 | 385 |
| 131 | 3'-5' | 106504414 | 106504608 | 106505047 | 165463112 | 439 | 28 | 429 |
| 132 | 3'-5' | 109684511 | 109684714 | 109685144 | 168643209 | 430 | 15 | 420 |
| 133 | 3'-5' | 109890591 | 109890735 | 109891224 | 168849289 | 489 | 21 | 479 |
| 134 | 3'-5' | 111097488 | 111097670 | 111098121 | 170056186 | 451 | 15 | 441 |
| 135 | 3'-5' | 112560930 | 112561189 | 112561563 | 171519628 | 374 | 8  | 364 |
| 136 | 3'-5' | 114533195 | 114533464 | 114533828 | 173491893 | 364 | 22 | 354 |

|     |       |                            |         |         |           |     |    |     |
|-----|-------|----------------------------|---------|---------|-----------|-----|----|-----|
| 137 | 3'-5' | NT_039212.6 (6)<br>3327692 | 3328026 | 3328325 | 180776484 | 299 | 17 | 289 |
|-----|-------|----------------------------|---------|---------|-----------|-----|----|-----|

3

|    |       |                            |          |          |          |     |    |     |
|----|-------|----------------------------|----------|----------|----------|-----|----|-----|
| 0  | 5'-3' | NT_078380.6 (1)<br>1835075 | 1835075  | 1835454  | 4835075  | 379 | 20 | 369 |
| 1  | 5'-3' | 2290623                    | 2290623  | 2291126  | 5290623  | 503 | 27 | 493 |
| 2  | 5'-3' | 4530446                    | 4530446  | 4530645  | 7530446  | 199 | 24 | 189 |
| 3  | 5'-3' | 5042316                    | 5042316  | 5042915  | 8042316  | 599 | 20 | 589 |
| 4  | 5'-3' | 6598377                    | 6598377  | 6598525  | 9598377  | 148 | 29 | 138 |
| 5  | 3'-5' | 767816                     | 768070   | 768449   | 3767816  | 379 | 10 | 369 |
| 6  | 3'-5' | 2324427                    | 2324651  | 2325060  | 5324427  | 409 | 22 | 399 |
| 7  | 3'-5' | 3500564                    | 3500793  | 3501197  | 6500564  | 404 | 21 | 394 |
| 8  | 3'-5' | 5464982                    | 5465381  | 5465615  | 8464982  | 234 | 34 | 224 |
| 9  | 3'-5' | 8841511                    | 8841842  | 8842144  | 11841511 | 302 | 18 | 292 |
| 10 | 3'-5' | 12418056                   | 12418556 | 12418689 | 15418056 | 133 | 17 | 123 |
| 11 | 3'-5' | 12549665                   | 12550165 | 12550298 | 15549665 | 133 | 17 | 123 |

| NT_162143.3 (2) |       |          |          |          |          |     |    |     |
|-----------------|-------|----------|----------|----------|----------|-----|----|-----|
| 12              | 5'-3' | 1701355  | 1701355  | 1701807  | 17362045 | 452 | 18 | 442 |
| 13              | 5'-3' | 2241892  | 2241892  | 2242277  | 17902582 | 385 | 7  | 375 |
| 14              | 5'-3' | 2285654  | 2285654  | 2286033  | 17946344 | 379 | 9  | 369 |
| 15              | 5'-3' | 5081682  | 5081682  | 5082016  | 20742372 | 334 | 21 | 324 |
| 16              | 5'-3' | 7051224  | 7051224  | 7051481  | 22711914 | 257 | 31 | 247 |
| 17              | 5'-3' | 16617583 | 16617583 | 16618047 | 32278273 | 464 | 11 | 454 |
| 18              | 5'-3' | 17808798 | 17808798 | 17809318 | 33469488 | 520 | 9  | 510 |
| 19              | 5'-3' | 19534384 | 19534384 | 19534731 | 35195074 | 347 | 7  | 337 |
| 20              | 5'-3' | 20894310 | 20894310 | 20894754 | 36555000 | 444 | 13 | 434 |
| 21              | 5'-3' | 21198679 | 21198679 | 21198900 | 36859369 | 221 | 25 | 211 |
| 22              | 5'-3' | 23738106 | 23738106 | 23738467 | 39398796 | 361 | 29 | 351 |
| 23              | 5'-3' | 24273160 | 24273160 | 24273488 | 39933850 | 328 | 17 | 318 |
| 24              | 3'-5' | 1345597  | 1345984  | 1346230  | 17006287 | 246 | 24 | 236 |
| 25              | 3'-5' | 2095751  | 2096071  | 2096384  | 17756441 | 313 | 32 | 303 |
| 26              | 3'-5' | 3818087  | 3818502  | 3818720  | 19478777 | 218 | 27 | 208 |
| 27              | 3'-5' | 6797041  | 6797304  | 6797674  | 22457731 | 370 | 21 | 360 |
| 28              | 3'-5' | 9129332  | 9129571  | 9129965  | 24790022 | 394 | 17 | 384 |
| 29              | 3'-5' | 9909809  | 9910101  | 9910442  | 25570499 | 341 | 9  | 331 |
| 30              | 3'-5' | 12038390 | 12038657 | 12039023 | 27699080 | 366 | 34 | 356 |
| 31              | 3'-5' | 13449272 | 13449530 | 13449905 | 29109962 | 375 | 7  | 365 |
| 32              | 3'-5' | 14410990 | 14411251 | 14411623 | 30071680 | 372 | 18 | 362 |
| 33              | 3'-5' | 17546497 | 17546811 | 17547130 | 33207187 | 319 | 16 | 309 |
| 34              | 3'-5' | 18360713 | 18361216 | 18361346 | 34021403 | 130 | 22 | 120 |
| 35              | 3'-5' | 19996347 | 19996561 | 19996980 | 35657037 | 419 | 26 | 409 |
| 36              | 3'-5' | 21593376 | 21593396 | 21594009 | 37254066 | 613 | 12 | 603 |
| 37              | 3'-5' | 21959513 | 21959840 | 21960146 | 37620203 | 306 | 24 | 296 |
| 38              | 3'-5' | 22725972 | 22726042 | 22726605 | 38386662 | 563 | 30 | 553 |
| 39              | 3'-5' | 23251920 | 23252186 | 23252553 | 38912610 | 367 | 13 | 357 |
| 40              | 3'-5' | 23482926 | 23482957 | 23483559 | 39143616 | 602 | 7  | 592 |
| 41              | 3'-5' | 23561117 | 23561359 | 23561750 | 39221807 | 391 | 19 | 381 |

| NT_039229.7 (3) |       |         |         |         |          |     |    |     |
|-----------------|-------|---------|---------|---------|----------|-----|----|-----|
| 42              | 5'-3' | 1454384 | 1454384 | 1454763 | 41908923 | 379 | 8  | 369 |
| 43              | 5'-3' | 4133616 | 4133616 | 4133956 | 44588155 | 340 | 15 | 330 |
| 44              | 5'-3' | 6691979 | 6691979 | 6692358 | 47146518 | 379 | 13 | 369 |
| 45              | 5'-3' | 8370419 | 8370419 | 8370788 | 48824958 | 369 | 24 | 359 |

|    |       |         |         |         |          |     |    |     |
|----|-------|---------|---------|---------|----------|-----|----|-----|
| 46 | 3'-5' | 179983  | 180229  | 180616  | 40634522 | 387 | 17 | 377 |
| 47 | 3'-5' | 2378422 | 2378682 | 2379055 | 42832961 | 373 | 28 | 363 |
| 48 | 3'-5' | 3164413 | 3164669 | 3165046 | 43618952 | 377 | 17 | 367 |
| 49 | 3'-5' | 6018765 | 6019013 | 6019398 | 46473304 | 385 | 21 | 375 |
| 50 | 3'-5' | 7616749 | 7616990 | 7617382 | 48071288 | 392 | 20 | 382 |
| 51 | 3'-5' | 8499997 | 8500264 | 8500630 | 48954536 | 366 | 19 | 356 |

NT\_166285.1 (5)

|    |       |          |          |          |           |     |    |     |
|----|-------|----------|----------|----------|-----------|-----|----|-----|
| 52 | 5'-3' | 2400538  | 2400538  | 2400689  | 133526974 | 151 | 16 | 141 |
| 53 | 5'-3' | 2421254  | 2421254  | 2421847  | 133547690 | 593 | 20 | 583 |
| 54 | 5'-3' | 4496009  | 4496009  | 4496400  | 135622445 | 391 | 24 | 381 |
| 55 | 5'-3' | 6270778  | 6270778  | 6271221  | 137397214 | 443 | 17 | 433 |
| 56 | 5'-3' | 8420990  | 8420990  | 8421434  | 139547426 | 444 | 13 | 434 |
| 57 | 5'-3' | 8648866  | 8648866  | 8649266  | 139775302 | 400 | 14 | 390 |
| 58 | 5'-3' | 10450262 | 10450262 | 10450615 | 141576698 | 353 | 6  | 343 |
| 59 | 5'-3' | 16448991 | 16448991 | 16449381 | 147575427 | 390 | 8  | 380 |
| 60 | 5'-3' | 23341363 | 23341363 | 23341812 | 154467799 | 449 | 15 | 439 |
| 61 | 5'-3' | 24679586 | 24679586 | 24680005 | 155806022 | 419 | 15 | 409 |
| 62 | 5'-3' | 25289552 | 25289552 | 25289891 | 156415988 | 339 | 10 | 329 |
| 63 | 5'-3' | 27629202 | 27629202 | 27629584 | 158755638 | 382 | 28 | 372 |
| 64 | 3'-5' | 1585626  | 1585799  | 1586259  | 132712062 | 460 | 22 | 450 |
| 65 | 3'-5' | 2748472  | 2748721  | 2749105  | 133874908 | 384 | 26 | 374 |
| 66 | 3'-5' | 4514938  | 4515246  | 4515571  | 135641374 | 325 | 16 | 315 |
| 67 | 3'-5' | 8086253  | 8086551  | 8086886  | 139212689 | 335 | 29 | 325 |
| 68 | 3'-5' | 9385971  | 9386184  | 9386604  | 140512407 | 420 | 25 | 410 |
| 69 | 3'-5' | 12591903 | 12592165 | 12592536 | 143718339 | 371 | 31 | 361 |
| 70 | 3'-5' | 16807045 | 16807261 | 16807678 | 147933481 | 417 | 26 | 407 |
| 71 | 3'-5' | 17554439 | 17554753 | 17555072 | 148680875 | 319 | 13 | 309 |
| 72 | 3'-5' | 18034711 | 18034891 | 18035344 | 149161147 | 453 | 21 | 443 |
| 73 | 3'-5' | 18226216 | 18226376 | 18226849 | 149352652 | 473 | 23 | 463 |
| 74 | 3'-5' | 18941272 | 18941461 | 18941905 | 150067708 | 444 | 19 | 434 |
| 75 | 3'-5' | 21300220 | 21300606 | 21300853 | 152426656 | 247 | 24 | 237 |
| 76 | 3'-5' | 21707400 | 21707618 | 21708033 | 152833836 | 415 | 13 | 405 |
| 77 | 3'-5' | 23084258 | 23084616 | 23084891 | 154210694 | 275 | 7  | 265 |
| 78 | 3'-5' | 24412298 | 24412792 | 24412931 | 155538734 | 139 | 15 | 129 |
| 79 | 3'-5' | 27338927 | 27339170 | 27339560 | 158465363 | 390 | 15 | 380 |

| NT_039258.7 (1) |       |          |          |          |          |     |    |     |
|-----------------|-------|----------|----------|----------|----------|-----|----|-----|
| 0               | 5'-3' | 2256910  | 2256910  | 2257209  | 5256910  | 299 | 16 | 289 |
| 1               | 5'-3' | 3884978  | 3884978  | 3885414  | 6884978  | 436 | 10 | 426 |
| 2               | 5'-3' | 4754488  | 4754488  | 4754882  | 7754488  | 394 | 11 | 384 |
| 3               | 5'-3' | 14682726 | 14682726 | 14683083 | 17682726 | 357 | 22 | 347 |
| 4               | 5'-3' | 15760572 | 15760572 | 15760923 | 18760572 | 351 | 8  | 341 |
| 5               | 5'-3' | 17029298 | 17029298 | 17029728 | 20029298 | 430 | 9  | 420 |
| 6               | 5'-3' | 18967773 | 18967773 | 18968311 | 21967773 | 538 | 15 | 528 |
| 7               | 5'-3' | 19322567 | 19322567 | 19322948 | 22322567 | 381 | 6  | 371 |
| 8               | 5'-3' | 19767633 | 19767633 | 19767993 | 22767633 | 360 | 24 | 350 |
| 9               | 5'-3' | 20056938 | 20056938 | 20057345 | 23056938 | 407 | 24 | 397 |
| 10              | 5'-3' | 22327974 | 22327974 | 22328323 | 25327974 | 349 | 30 | 339 |
| 11              | 5'-3' | 23427886 | 23427886 | 23428276 | 26427886 | 390 | 26 | 380 |
| 12              | 5'-3' | 25358641 | 25358641 | 25358927 | 28358641 | 286 | 10 | 276 |
| 13              | 3'-5' | 3706981  | 3707207  | 3707614  | 6706981  | 407 | 11 | 397 |
| 14              | 3'-5' | 5855017  | 5855366  | 5855650  | 8855017  | 284 | 25 | 274 |
| 15              | 3'-5' | 8842376  | 8842487  | 8843009  | 11842376 | 522 | 29 | 512 |
| 16              | 3'-5' | 11679121 | 11679325 | 11679754 | 14679121 | 429 | 20 | 419 |
| 17              | 3'-5' | 14283304 | 14283742 | 14283937 | 17283304 | 195 | 17 | 185 |
| 18              | 3'-5' | 15453431 | 15453711 | 15454064 | 18453431 | 353 | 20 | 343 |
| 19              | 3'-5' | 20848070 | 20848320 | 20848703 | 23848070 | 383 | 26 | 373 |
| 20              | 3'-5' | 21556591 | 21556839 | 21557224 | 24556591 | 385 | 27 | 375 |
| 21              | 3'-5' | 22280936 | 22281101 | 22281569 | 25280936 | 468 | 9  | 458 |
| 22              | 3'-5' | 23378806 | 23379149 | 23379439 | 26378806 | 290 | 13 | 280 |
| 23              | 3'-5' | 23884716 | 23884818 | 23885349 | 26884716 | 531 | 30 | 521 |
| 24              | 3'-5' | 24178087 | 24178406 | 24178720 | 27178087 | 314 | 28 | 304 |
| 25              | 3'-5' | 24908281 | 24908633 | 24908914 | 27908281 | 281 | 6  | 271 |
| 26              | 3'-5' | 25821935 | 25822046 | 25822568 | 28821935 | 522 | 19 | 512 |
| 27              | 3'-5' | 26492443 | 26492706 | 26493076 | 29492443 | 370 | 18 | 360 |
| 28              | 3'-5' | 26915577 | 26915864 | 26916210 | 29915577 | 346 | 30 | 336 |
| 29              | 3'-5' | 27360534 | 27360812 | 27361167 | 30360534 | 355 | 31 | 345 |
| 30              | 3'-5' | 27542471 | 27542781 | 27543104 | 30542471 | 323 | 7  | 313 |
| NT_166289.1 (2) |       |          |          |          |          |     |    |     |
| 31              | 5'-3' | 1035044  | 1035044  | 1035498  | 32584745 | 454 | 10 | 444 |
| 32              | 5'-3' | 4596053  | 4596053  | 4596439  | 36145754 | 386 | 12 | 376 |
| 33              | 5'-3' | 7754482  | 7754482  | 7754797  | 39304183 | 315 | 27 | 305 |

|    |       |         |         |         |          |     |    |     |
|----|-------|---------|---------|---------|----------|-----|----|-----|
| 34 | 5'-3' | 7963809 | 7963809 | 7964115 | 39513510 | 306 | 30 | 296 |
| 35 | 3'-5' | 4993614 | 4993916 | 4994247 | 36543315 | 331 | 17 | 321 |

NT\_109315.4 (3)

|    |       |          |          |          |          |     |    |     |
|----|-------|----------|----------|----------|----------|-----|----|-----|
| 36 | 5'-3' | 2768309  | 2768309  | 2768667  | 44929234 | 358 | 21 | 348 |
| 37 | 5'-3' | 5855311  | 5855311  | 5855761  | 48016236 | 450 | 16 | 440 |
| 38 | 5'-3' | 8633740  | 8633740  | 8634121  | 50794665 | 381 | 18 | 371 |
| 39 | 5'-3' | 9210525  | 9210525  | 9210820  | 51371450 | 295 | 20 | 285 |
| 40 | 5'-3' | 10960810 | 10960810 | 10961332 | 53121735 | 522 | 6  | 512 |
| 41 | 5'-3' | 12717035 | 12717035 | 12717366 | 54877960 | 331 | 11 | 321 |
| 42 | 5'-3' | 15992849 | 15992849 | 15993266 | 58153774 | 417 | 12 | 407 |
| 43 | 3'-5' | 8491359  | 8491445  | 8491992  | 50652284 | 547 | 24 | 537 |
| 44 | 3'-5' | 9846699  | 9846973  | 9847332  | 52007624 | 359 | 27 | 349 |
| 45 | 3'-5' | 10361131 | 10361214 | 10361764 | 52522056 | 550 | 33 | 540 |
| 46 | 3'-5' | 13219433 | 13219629 | 13220066 | 55380358 | 437 | 26 | 427 |
| 47 | 3'-5' | 14206685 | 14206836 | 14207318 | 56367610 | 482 | 22 | 472 |

NT\_039260.7 (4)

|    |       |          |          |          |          |     |    |     |
|----|-------|----------|----------|----------|----------|-----|----|-----|
| 48 | 5'-3' | 1769055  | 1769055  | 1769353  | 62140440 | 298 | 24 | 288 |
| 49 | 5'-3' | 1824076  | 1824076  | 1824460  | 62195461 | 384 | 22 | 374 |
| 50 | 5'-3' | 1869903  | 1869903  | 1870414  | 62241288 | 511 | 11 | 501 |
| 51 | 5'-3' | 3457760  | 3457760  | 3458268  | 63829145 | 508 | 11 | 498 |
| 52 | 5'-3' | 6459320  | 6459320  | 6459667  | 66830705 | 347 | 8  | 337 |
| 53 | 5'-3' | 9106470  | 9106470  | 9106954  | 69477855 | 484 | 13 | 474 |
| 54 | 5'-3' | 9106509  | 9106509  | 9106954  | 69477894 | 445 | 24 | 435 |
| 55 | 5'-3' | 11424440 | 11424440 | 11424843 | 71795825 | 403 | 24 | 393 |
| 56 | 5'-3' | 12020658 | 12020658 | 12020976 | 72392043 | 318 | 12 | 308 |
| 57 | 5'-3' | 13437970 | 13437970 | 13438495 | 73809355 | 525 | 27 | 515 |
| 58 | 5'-3' | 13588582 | 13588582 | 13589056 | 73959967 | 474 | 7  | 464 |
| 59 | 5'-3' | 14767424 | 14767424 | 14767847 | 75138809 | 423 | 31 | 413 |
| 60 | 5'-3' | 14815188 | 14815188 | 14815509 | 75186573 | 321 | 19 | 311 |
| 61 | 5'-3' | 17205660 | 17205660 | 17206137 | 77577045 | 477 | 9  | 467 |
| 62 | 5'-3' | 17669392 | 17669392 | 17669729 | 78040777 | 337 | 30 | 327 |
| 63 | 5'-3' | 19237439 | 19237439 | 19237931 | 79608824 | 492 | 13 | 482 |
| 64 | 5'-3' | 21264144 | 21264144 | 21264600 | 81635529 | 456 | 11 | 446 |
| 65 | 5'-3' | 21362091 | 21362091 | 21362570 | 81733476 | 479 | 24 | 469 |
| 66 | 5'-3' | 24414002 | 24414002 | 24414312 | 84785387 | 310 | 19 | 300 |

|    |       |          |          |          |          |     |    |     |
|----|-------|----------|----------|----------|----------|-----|----|-----|
| 67 | 5'-3' | 24535500 | 24535500 | 24535747 | 84906885 | 247 | 29 | 237 |
| 68 | 3'-5' | 3418829  | 3418882  | 3419462  | 63790214 | 580 | 10 | 570 |
| 69 | 3'-5' | 3935513  | 3935642  | 3936146  | 64306898 | 504 | 27 | 494 |
| 70 | 3'-5' | 4011750  | 4012054  | 4012383  | 64383135 | 329 | 9  | 319 |
| 71 | 3'-5' | 5844308  | 5844564  | 5844941  | 66215693 | 377 | 34 | 367 |
| 72 | 3'-5' | 8092692  | 8092940  | 8093325  | 68464077 | 385 | 27 | 375 |
| 73 | 3'-5' | 12112238 | 12112442 | 12112871 | 72483623 | 429 | 8  | 419 |
| 74 | 3'-5' | 12437002 | 12437283 | 12437635 | 72808387 | 352 | 21 | 342 |
| 75 | 3'-5' | 12976648 | 12976902 | 12977281 | 73348033 | 379 | 17 | 369 |
| 76 | 3'-5' | 15369632 | 15369875 | 15370265 | 75741017 | 390 | 26 | 380 |
| 77 | 3'-5' | 16425660 | 16426000 | 16426293 | 76797045 | 293 | 27 | 283 |
| 78 | 3'-5' | 16600902 | 16601063 | 16601535 | 76972287 | 472 | 7  | 462 |
| 79 | 3'-5' | 17894202 | 17894476 | 17894835 | 78265587 | 359 | 11 | 349 |
| 80 | 3'-5' | 17987263 | 17987754 | 17987896 | 78358648 | 142 | 8  | 132 |
| 81 | 3'-5' | 18191502 | 18191736 | 18192135 | 78562887 | 399 | 18 | 389 |
| 82 | 3'-5' | 18245905 | 18246126 | 18246538 | 78617290 | 412 | 10 | 402 |
| 83 | 3'-5' | 18543087 | 18543383 | 18543720 | 78914472 | 337 | 6  | 327 |
| 84 | 3'-5' | 19286841 | 19287064 | 19287474 | 79658226 | 410 | 7  | 400 |
| 85 | 3'-5' | 19819114 | 19819351 | 19819747 | 80190499 | 396 | 24 | 386 |
| 86 | 3'-5' | 22889298 | 22889445 | 22889931 | 83260683 | 486 | 12 | 476 |
| 87 | 3'-5' | 23823959 | 23824032 | 23824592 | 84195344 | 560 | 32 | 550 |
| 88 | 3'-5' | 24620225 | 24620566 | 24620858 | 84991610 | 292 | 14 | 282 |
| 89 | 3'-5' | 24934721 | 24934933 | 24935354 | 85306106 | 421 | 34 | 411 |
| 90 | 3'-5' | 25228179 | 25228458 | 25228812 | 85599564 | 354 | 9  | 344 |
| 91 | 3'-5' | 28140924 | 28141209 | 28141557 | 88512309 | 348 | 25 | 338 |

NT\_039280.5 (5)

|     |       |         |         |         |          |     |    |     |
|-----|-------|---------|---------|---------|----------|-----|----|-----|
| 92  | 5'-3' | 2811347 | 2811347 | 2811747 | 91824055 | 400 | 8  | 390 |
| 93  | 5'-3' | 2986103 | 2986103 | 2986464 | 91998811 | 361 | 20 | 351 |
| 94  | 5'-3' | 3255187 | 3255187 | 3255564 | 92267895 | 377 | 31 | 367 |
| 95  | 5'-3' | 5290293 | 5290293 | 5290638 | 94303001 | 345 | 31 | 335 |
| 96  | 5'-3' | 6109010 | 6109010 | 6109198 | 95121718 | 188 | 9  | 178 |
| 97  | 5'-3' | 6559599 | 6559599 | 6559919 | 95572307 | 320 | 15 | 310 |
| 98  | 5'-3' | 9530919 | 9530919 | 9531215 | 98543627 | 296 | 16 | 286 |
| 99  | 5'-3' | 9572904 | 9572904 | 9573233 | 98585612 | 329 | 29 | 319 |
| 100 | 3'-5' | 256731  | 256924  | 257364  | 89269439 | 440 | 9  | 430 |
| 101 | 3'-5' | 1489310 | 1489607 | 1489943 | 90502018 | 336 | 16 | 326 |

|                 |       |          |          |          |           |     |    |     |
|-----------------|-------|----------|----------|----------|-----------|-----|----|-----|
| 102             | 3'-5' | 2744908  | 2744944  | 2745541  | 91757616  | 597 | 8  | 587 |
| 103             | 3'-5' | 4306620  | 4306803  | 4307253  | 93319328  | 450 | 11 | 440 |
| 104             | 3'-5' | 4478477  | 4478834  | 4479110  | 93491185  | 276 | 12 | 266 |
| NT_039264.6 (6) |       |          |          |          |           |     |    |     |
| 105             | 5'-3' | 1832269  | 1832269  | 1832644  | 101381070 | 375 | 12 | 365 |
| 106             | 5'-3' | 2328131  | 2328131  | 2328534  | 101876932 | 403 | 19 | 393 |
| 107             | 5'-3' | 7011333  | 7011333  | 7011846  | 106560134 | 513 | 11 | 503 |
| 108             | 5'-3' | 9873848  | 9873848  | 9874239  | 109422649 | 391 | 16 | 381 |
| 109             | 5'-3' | 10672098 | 10672098 | 10672587 | 110220899 | 489 | 26 | 479 |
| 110             | 5'-3' | 14627046 | 14627046 | 14627458 | 114175847 | 412 | 28 | 402 |
| 111             | 5'-3' | 17333156 | 17333156 | 17333297 | 116881957 | 141 | 13 | 131 |
| 112             | 3'-5' | 1662796  | 1663098  | 1663429  | 101211597 | 331 | 9  | 321 |
| 113             | 3'-5' | 3889983  | 3890259  | 3890616  | 103438784 | 357 | 17 | 347 |
| 114             | 3'-5' | 5327137  | 5327469  | 5327770  | 104875938 | 301 | 20 | 291 |
| 115             | 3'-5' | 7844270  | 7844507  | 7844903  | 107393071 | 396 | 33 | 386 |
| 116             | 3'-5' | 8966191  | 8966410  | 8966824  | 108514992 | 414 | 15 | 404 |
| 117             | 3'-5' | 9607988  | 9608249  | 9608621  | 109156789 | 372 | 17 | 362 |
| 118             | 3'-5' | 10810792 | 10811221 | 10811425 | 110359593 | 204 | 29 | 194 |
| 119             | 3'-5' | 11275029 | 11275457 | 11275662 | 110823830 | 205 | 9  | 195 |
| 120             | 3'-5' | 11744151 | 11744385 | 11744784 | 111292952 | 399 | 16 | 389 |
| 121             | 3'-5' | 12855907 | 12856159 | 12856540 | 112404708 | 381 | 9  | 371 |
| 122             | 3'-5' | 14838867 | 14839137 | 14839500 | 114387668 | 363 | 9  | 353 |
| 123             | 3'-5' | 21753253 | 21753699 | 21753886 | 121302054 | 187 | 22 | 177 |
| NT_109316.2 (7) |       |          |          |          |           |     |    |     |
| 124             | 3'-5' | 280599   | 280902   | 281232   | 121779355 | 330 | 15 | 320 |
| NT_109317.2 (8) |       |          |          |          |           |     |    |     |
| 125             | 5'-3' | 650116   | 650116   | 650643   | 122735021 | 527 | 9  | 517 |
| 126             | 5'-3' | 4188616  | 4188616  | 4188864  | 126273521 | 248 | 22 | 238 |
| 127             | 5'-3' | 7179245  | 7179245  | 7179667  | 129264150 | 422 | 15 | 412 |
| 128             | 3'-5' | 3017289  | 3017336  | 3017922  | 125102194 | 586 | 15 | 576 |
| 129             | 3'-5' | 4712916  | 4713146  | 4713549  | 126797821 | 403 | 27 | 393 |
| 130             | 3'-5' | 4927943  | 4928437  | 4928576  | 127012848 | 139 | 13 | 129 |
| NT_039267.7 (9) |       |          |          |          |           |     |    |     |



|     |       |                  |          |          |           |     |    |     |
|-----|-------|------------------|----------|----------|-----------|-----|----|-----|
| 131 | 5'-3' | 1477506          | 1477506  | 1477847  | 131597772 | 341 | 27 | 331 |
| 132 | 5'-3' | 4208093          | 4208093  | 4208535  | 134328359 | 442 | 29 | 432 |
|     |       | NT_162293.1 (10) |          |          |           |     |    |     |
| 133 | 5'-3' | 782043           | 782043   | 782282   | 142859844 | 239 | 27 | 229 |
| 134 | 3'-5' | 120475           | 120731   | 121108   | 142198276 | 377 | 26 | 367 |
|     |       | NT_039268.5 (11) |          |          |           |     |    |     |
| 135 | 5'-3' | 2449624          | 2449624  | 2450013  | 147989502 | 389 | 19 | 379 |
|     |       | NT_039299.7 (1)  |          |          |           |     |    |     |
| 0   | 5'-3' | 4256606          | 4256606  | 4257081  | 7256606   | 475 | 9  | 465 |
| 1   | 5'-3' | 4648394          | 4648394  | 4648756  | 7648394   | 362 | 10 | 352 |
| 2   | 5'-3' | 6221649          | 6221649  | 6222084  | 9221649   | 435 | 20 | 425 |
| 3   | 5'-3' | 6301822          | 6301822  | 6302190  | 9301822   | 368 | 20 | 358 |
| 4   | 5'-3' | 9619663          | 9619663  | 9619923  | 12619663  | 260 | 20 | 250 |
| 5   | 5'-3' | 9782389          | 9782389  | 9782640  | 12782389  | 251 | 12 | 241 |
| 6   | 5'-3' | 11705456         | 11705456 | 11705832 | 14705456  | 376 | 28 | 366 |
| 7   | 3'-5' | 88118            | 88370    | 88751    | 3088118   | 381 | 14 | 371 |
| 8   | 3'-5' | 3031157          | 3031574  | 3031790  | 6031157   | 216 | 7  | 206 |
| 9   | 3'-5' | 3055254          | 3055513  | 3055887  | 6055254   | 374 | 31 | 364 |
| 10  | 3'-5' | 3275416          | 3275463  | 3276049  | 6275416   | 586 | 29 | 576 |
| 11  | 3'-5' | 6622988          | 6623090  | 6623621  | 9622988   | 531 | 18 | 521 |
| 12  | 3'-5' | 7109645          | 7109746  | 7110278  | 10109645  | 532 | 22 | 522 |
| 13  | 3'-5' | 9819538          | 9819744  | 9820171  | 12819538  | 427 | 30 | 417 |
| 14  | 3'-5' | 11200804         | 11201021 | 11201437 | 14200804  | 416 | 20 | 406 |
| 15  | 3'-5' | 11722143         | 11722402 | 11722776 | 14722143  | 374 | 11 | 364 |
|     |       | NT_165760.2 (2)  |          |          |           |     |    |     |
| 16  | 5'-3' | 798098           | 798098   | 798517   | 15910764  | 419 | 29 | 409 |
| 17  | 5'-3' | 4425886          | 4425886  | 4426276  | 19538552  | 390 | 29 | 380 |
| 18  | 5'-3' | 4667912          | 4667912  | 4668298  | 19780578  | 386 | 23 | 376 |
| 19  | 5'-3' | 6007740          | 6007740  | 6008127  | 21120406  | 387 | 7  | 377 |
| 20  | 5'-3' | 6313417          | 6313417  | 6313809  | 21426083  | 392 | 23 | 382 |
| 21  | 5'-3' | 7798378          | 7798378  | 7798656  | 22911044  | 278 | 29 | 268 |
| 22  | 3'-5' | 443994           | 444212   | 444627   | 15556660  | 415 | 7  | 405 |
| 23  | 3'-5' | 454161           | 454423   | 454794   | 15566827  | 371 | 18 | 361 |

|    |       |                 |          |          |          |     |    |     |
|----|-------|-----------------|----------|----------|----------|-----|----|-----|
| 24 | 3'-5' | 902471          | 902769   | 903104   | 16015137 | 335 | 8  | 325 |
| 25 | 3'-5' | 3702825         | 3703094  | 3703458  | 18815491 | 364 | 13 | 354 |
| 26 | 3'-5' | 6314291         | 6314619  | 6314924  | 21426957 | 305 | 21 | 295 |
|    |       | NT_166300.1 (4) |          |          |          |     |    |     |
| 27 | 3'-5' | 1394307         | 1394592  | 1394940  | 32036303 | 348 | 29 | 338 |
| 28 | 3'-5' | 2352799         | 2352996  | 2353432  | 32994795 | 436 | 22 | 426 |
|    |       | NT_039302.7 (5) |          |          |          |     |    |     |
| 29 | 5'-3' | 3897479         | 3897479  | 3897895  | 36963847 | 416 | 26 | 406 |
|    |       | NT_039305.7 (6) |          |          |          |     |    |     |
| 30 | 5'-3' | 4067452         | 4067452  | 4067780  | 41119347 | 328 | 11 | 318 |
| 31 | 5'-3' | 4216285         | 4216285  | 4216782  | 41268180 | 497 | 24 | 487 |
| 32 | 5'-3' | 7084414         | 7084414  | 7084795  | 44136309 | 381 | 31 | 371 |
| 33 | 5'-3' | 8012533         | 8012533  | 8012997  | 45064428 | 464 | 7  | 454 |
| 34 | 5'-3' | 11456685        | 11456685 | 11457019 | 48508580 | 334 | 26 | 324 |
| 35 | 5'-3' | 12107769        | 12107769 | 12108144 | 49159664 | 375 | 30 | 365 |
| 36 | 5'-3' | 18025269        | 18025269 | 18025668 | 55077164 | 399 | 29 | 389 |
| 37 | 5'-3' | 20162996        | 20162996 | 20163392 | 57214891 | 396 | 23 | 386 |
| 38 | 5'-3' | 21273846        | 21273846 | 21274097 | 58325741 | 251 | 13 | 241 |
| 39 | 5'-3' | 22939143        | 22939143 | 22939481 | 59991038 | 338 | 16 | 328 |
| 40 | 5'-3' | 23336643        | 23336643 | 23336892 | 60388538 | 249 | 9  | 239 |
| 41 | 5'-3' | 25920185        | 25920185 | 25920646 | 62972080 | 461 | 31 | 451 |
| 42 | 5'-3' | 27131499        | 27131499 | 27131900 | 64183394 | 401 | 17 | 391 |
| 43 | 5'-3' | 27496362        | 27496362 | 27496736 | 64548257 | 374 | 20 | 364 |
| 44 | 5'-3' | 27496412        | 27496412 | 27496736 | 64548307 | 324 | 20 | 314 |
| 45 | 5'-3' | 28010211        | 28010211 | 28010626 | 65062106 | 415 | 22 | 405 |
| 46 | 5'-3' | 32323264        | 32323264 | 32323643 | 69375159 | 379 | 27 | 369 |
| 47 | 5'-3' | 34738180        | 34738180 | 34738553 | 71790075 | 373 | 10 | 363 |
| 48 | 5'-3' | 35509226        | 35509226 | 35509675 | 72561121 | 449 | 6  | 439 |
| 49 | 5'-3' | 35818830        | 35818830 | 35819454 | 72870725 | 624 | 8  | 614 |
| 50 | 3'-5' | 4495830         | 4496070  | 4496463  | 41547725 | 393 | 32 | 383 |
| 51 | 3'-5' | 5172961         | 5173263  | 5173594  | 42224856 | 331 | 27 | 321 |
| 52 | 3'-5' | 11716651        | 11717000 | 11717284 | 48768546 | 284 | 16 | 274 |
| 53 | 3'-5' | 12722535        | 12722773 | 12723168 | 49774430 | 395 | 11 | 385 |
| 54 | 3'-5' | 16341878        | 16342160 | 16342511 | 53393773 | 351 | 6  | 341 |
| 55 | 3'-5' | 17745591        | 17745834 | 17746224 | 54797486 | 390 | 23 | 380 |
| 56 | 3'-5' | 21470678        | 21470900 | 21471311 | 58522573 | 411 | 6  | 401 |

|    |       |                             |          |          |           |     |    |     |
|----|-------|-----------------------------|----------|----------|-----------|-----|----|-----|
| 57 | 3'-5' | 25789224                    | 25789475 | 25789857 | 62841119  | 382 | 20 | 372 |
| 58 | 3'-5' | 26098248                    | 26098365 | 26098881 | 63150143  | 516 | 17 | 506 |
| 59 | 3'-5' | 26901317                    | 26901577 | 26901950 | 63953212  | 373 | 34 | 363 |
| 60 | 3'-5' | 29264936                    | 29265311 | 29265569 | 66316831  | 258 | 31 | 248 |
| 61 | 3'-5' | 32550692                    | 32550800 | 32551325 | 69602587  | 525 | 34 | 515 |
| 62 | 3'-5' | 32684727                    | 32685040 | 32685360 | 69736622  | 320 | 8  | 310 |
| 63 | 3'-5' | 33193213                    | 33193324 | 33193846 | 70245108  | 522 | 31 | 512 |
| 64 | 3'-5' | 34856346                    | 34856580 | 34856979 | 71908241  | 399 | 16 | 389 |
|    |       |                             |          |          |           |     |    |     |
| 65 | 3'-5' | NT_039306.7 (7)<br>347991   | 348099   | 348624   | 74731248  | 525 | 12 | 515 |
|    |       |                             |          |          |           |     |    |     |
| 66 | 5'-3' | NT_109320.4 (8)<br>141065   | 141065   | 141442   | 76668944  | 377 | 23 | 367 |
| 67 | 5'-3' | 2003159                     | 2003159  | 2003642  | 78531038  | 483 | 15 | 473 |
| 68 | 5'-3' | 3529974                     | 3529974  | 3530381  | 80057853  | 407 | 17 | 397 |
| 69 | 5'-3' | 3922883                     | 3922883  | 3923167  | 80450762  | 284 | 31 | 274 |
| 70 | 5'-3' | 4046354                     | 4046354  | 4046806  | 80574233  | 452 | 24 | 442 |
| 71 | 5'-3' | 4343074                     | 4343074  | 4343449  | 80870953  | 375 | 6  | 365 |
| 72 | 5'-3' | 6749566                     | 6749566  | 6749963  | 83277445  | 397 | 8  | 387 |
| 73 | 3'-5' | 2068161                     | 2068332  | 2068794  | 78596040  | 462 | 21 | 452 |
| 74 | 3'-5' | 2718513                     | 2718693  | 2719146  | 79246392  | 453 | 22 | 443 |
| 75 | 3'-5' | 3085670                     | 3086001  | 3086303  | 79613549  | 302 | 15 | 292 |
| 76 | 3'-5' | 4658791                     | 4659066  | 4659424  | 81186670  | 358 | 31 | 348 |
| 77 | 3'-5' | 7510819                     | 7511080  | 7511452  | 84038698  | 372 | 7  | 362 |
|    |       |                             |          |          |           |     |    |     |
| 78 | 5'-3' | NT_078458.6 (9)<br>3133425  | 3133425  | 3133655  | 117119419 | 230 | 11 | 220 |
| 79 | 5'-3' | 10384267                    | 10384267 | 10384607 | 124370261 | 340 | 18 | 330 |
| 80 | 3'-5' | 2846146                     | 2846373  | 2846779  | 116832140 | 406 | 17 | 396 |
| 81 | 3'-5' | 5162017                     | 5162286  | 5162650  | 119148011 | 364 | 34 | 354 |
|    |       |                             |          |          |           |     |    |     |
| 82 | 3'-5' | NT_039313.7 (10)<br>3456269 | 3456535  | 3456902  | 128646608 | 367 | 34 | 357 |
|    |       |                             |          |          |           |     |    |     |
| 83 | 5'-3' | NT_039314.7 (11)<br>1037568 | 1037568  | 1037956  | 131358154 | 388 | 22 | 378 |

|                  |       |          |          |          |           |     |    |     |
|------------------|-------|----------|----------|----------|-----------|-----|----|-----|
| 84               | 5'-3' | 3259002  | 3259002  | 3259599  | 133579588 | 597 | 16 | 587 |
| 85               | 5'-3' | 4127077  | 4127077  | 4127503  | 134447663 | 426 | 23 | 416 |
| 86               | 3'-5' | 774127   | 774354   | 774760   | 131094713 | 406 | 25 | 396 |
| 87               | 3'-5' | 1927156  | 1927414  | 1927789  | 132247742 | 375 | 16 | 365 |
| 88               | 3'-5' | 2613234  | 2613469  | 2613867  | 132933820 | 398 | 30 | 388 |
| 89               | 3'-5' | 3556554  | 3556826  | 3557187  | 133877140 | 361 | 33 | 351 |
| NT_039316.7 (13) |       |          |          |          |           |     |    |     |
| 90               | 3'-5' | 2017478  | 2017959  | 2018111  | 141176358 | 152 | 26 | 142 |
| NT_081055.6 (15) |       |          |          |          |           |     |    |     |
| 91               | 5'-3' | 1083300  | 1083300  | 1083920  | 144495051 | 620 | 8  | 610 |
| 92               | 3'-5' | 27092    | 27511    | 27725    | 143438843 | 214 | 29 | 204 |
| NT_039324.7 (17) |       |          |          |          |           |     |    |     |
| 93               | 5'-3' | 1427686  | 1427686  | 1428109  | 147900661 | 423 | 25 | 413 |
| 94               | 5'-3' | 1458552  | 1458552  | 1458873  | 147931527 | 321 | 22 | 311 |
| 95               | 3'-5' | 1867701  | 1867957  | 1868334  | 148340676 | 377 | 6  | 367 |
| 96               | 3'-5' | 3461081  | 3461327  | 3461714  | 149934056 | 387 | 34 | 377 |
| NT_039325.7 (18) |       |          |          |          |           |     |    |     |
| 97               | 5'-3' | 1000613  | 1000613  | 1000997  | 151115811 | 384 | 19 | 374 |
| 98               | 3'-5' | 1299615  | 1299803  | 1300248  | 151414813 | 445 | 30 | 435 |
| NT_039340.7 (1)  |       |          |          |          |           |     |    |     |
| 0                | 5'-3' | 1347104  | 1347104  | 1347559  | 4347104   | 455 | 27 | 445 |
| 1                | 5'-3' | 1365691  | 1365691  | 1366017  | 4365691   | 326 | 11 | 316 |
| 2                | 5'-3' | 3545508  | 3545508  | 3545887  | 6545508   | 379 | 17 | 369 |
| 3                | 5'-3' | 7064069  | 7064069  | 7064402  | 10064069  | 333 | 22 | 323 |
| 4                | 5'-3' | 7555589  | 7555589  | 7555975  | 10555589  | 386 | 10 | 376 |
| 5                | 5'-3' | 8363995  | 8363995  | 8364348  | 11363995  | 353 | 17 | 343 |
| 6                | 5'-3' | 11435061 | 11435061 | 11435610 | 14435061  | 549 | 31 | 539 |
| 7                | 5'-3' | 11461511 | 11461511 | 11461879 | 14461511  | 368 | 28 | 358 |
| 8                | 5'-3' | 12660909 | 12660909 | 12661205 | 15660909  | 296 | 27 | 286 |
| 9                | 5'-3' | 14422612 | 14422612 | 14422923 | 17422612  | 311 | 17 | 301 |
| 10               | 5'-3' | 17213196 | 17213196 | 17213567 | 20213196  | 371 | 21 | 361 |
| 11               | 5'-3' | 19513270 | 19513270 | 19513757 | 22513270  | 487 | 9  | 477 |

|    |       |          |          |          |          |     |    |     |
|----|-------|----------|----------|----------|----------|-----|----|-----|
| 12 | 5'-3' | 21103218 | 21103218 | 21103584 | 24103218 | 366 | 27 | 356 |
| 13 | 5'-3' | 22366477 | 22366477 | 22366903 | 25366477 | 426 | 14 | 416 |
| 14 | 5'-3' | 23246539 | 23246539 | 23246940 | 26246539 | 401 | 22 | 391 |
| 15 | 5'-3' | 23270369 | 23270369 | 23270724 | 26270369 | 355 | 28 | 345 |
| 16 | 5'-3' | 23364355 | 23364355 | 23364739 | 26364355 | 384 | 21 | 374 |
| 17 | 5'-3' | 24423429 | 24423429 | 24423821 | 27423429 | 392 | 30 | 382 |
| 18 | 5'-3' | 26292277 | 26292277 | 26292664 | 29292277 | 387 | 26 | 377 |
| 19 | 3'-5' | 4826628  | 4826854  | 4827261  | 7826628  | 407 | 31 | 397 |
| 20 | 3'-5' | 6227329  | 6227551  | 6227962  | 9227329  | 411 | 22 | 401 |
| 21 | 3'-5' | 6653118  | 6653368  | 6653751  | 9653118  | 383 | 18 | 373 |
| 22 | 3'-5' | 7134407  | 7134757  | 7135040  | 10134407 | 283 | 9  | 273 |
| 23 | 3'-5' | 10949105 | 10949533 | 10949738 | 13949105 | 205 | 13 | 195 |
| 24 | 3'-5' | 13041723 | 13042034 | 13042356 | 16041723 | 322 | 7  | 312 |
| 25 | 3'-5' | 14705603 | 14705865 | 14706236 | 17705603 | 371 | 12 | 361 |
| 26 | 3'-5' | 16191334 | 16191463 | 16191967 | 19191334 | 504 | 6  | 494 |
| 27 | 3'-5' | 18107654 | 18107852 | 18108287 | 21107654 | 435 | 31 | 425 |
| 28 | 3'-5' | 19221053 | 19221214 | 19221686 | 22221053 | 472 | 14 | 462 |
| 29 | 3'-5' | 24158956 | 24159249 | 24159589 | 27158956 | 340 | 22 | 330 |
| 30 | 3'-5' | 25035853 | 25036148 | 25036486 | 28035853 | 338 | 24 | 328 |
| 31 | 3'-5' | 25151464 | 25151594 | 25152097 | 28151464 | 503 | 19 | 493 |
| 32 | 3'-5' | 27084241 | 27084436 | 27084874 | 30084241 | 438 | 24 | 428 |

NT\_039341.7 (2)

|    |       |          |          |          |          |     |    |     |
|----|-------|----------|----------|----------|----------|-----|----|-----|
| 33 | 5'-3' | 453218   | 453218   | 453683   | 31206029 | 465 | 30 | 455 |
| 34 | 5'-3' | 1946692  | 1946692  | 1947304  | 32699503 | 612 | 7  | 602 |
| 35 | 5'-3' | 2364322  | 2364322  | 2364531  | 33117133 | 209 | 13 | 199 |
| 36 | 5'-3' | 3748164  | 3748164  | 3748485  | 34500975 | 321 | 16 | 311 |
| 37 | 5'-3' | 6143216  | 6143216  | 6143803  | 36896027 | 587 | 8  | 577 |
| 38 | 5'-3' | 8085870  | 8085870  | 8086257  | 38838681 | 387 | 15 | 377 |
| 39 | 5'-3' | 10774896 | 10774896 | 10775395 | 41527707 | 499 | 31 | 489 |
| 40 | 5'-3' | 11565533 | 11565533 | 11565863 | 42318344 | 330 | 17 | 320 |
| 41 | 5'-3' | 13935069 | 13935069 | 13935394 | 44687880 | 325 | 20 | 315 |
| 42 | 5'-3' | 15571352 | 15571352 | 15571711 | 46324163 | 359 | 21 | 349 |
| 43 | 3'-5' | 683523   | 683972   | 684156   | 31436334 | 184 | 26 | 174 |
| 44 | 3'-5' | 3940925  | 3941152  | 3941558  | 34693736 | 406 | 12 | 396 |
| 45 | 3'-5' | 7973093  | 7973466  | 7973726  | 38725904 | 260 | 13 | 250 |
| 46 | 3'-5' | 8407819  | 8408195  | 8408452  | 39160630 | 257 | 20 | 247 |

|    |       |          |          |          |          |     |    |     |
|----|-------|----------|----------|----------|----------|-----|----|-----|
| 47 | 3'-5' | 8938654  | 8938914  | 8939287  | 39691465 | 373 | 34 | 363 |
| 48 | 3'-5' | 9145270  | 9145471  | 9145903  | 39898081 | 432 | 26 | 422 |
| 49 | 3'-5' | 10212621 | 10212868 | 10213254 | 40965432 | 386 | 25 | 376 |
| 50 | 3'-5' | 11136089 | 11136304 | 11136722 | 41888900 | 418 | 15 | 408 |
| 51 | 3'-5' | 12808679 | 12808940 | 12809312 | 43561490 | 372 | 31 | 362 |

NT\_039353.7 (3)

|    |       |          |          |          |           |     |    |     |
|----|-------|----------|----------|----------|-----------|-----|----|-----|
| 52 | 5'-3' | 2539423  | 2539423  | 2539791  | 50226461  | 368 | 14 | 358 |
| 53 | 5'-3' | 3267975  | 3267975  | 3268444  | 50955013  | 469 | 17 | 459 |
| 54 | 5'-3' | 4118471  | 4118471  | 4119062  | 51805509  | 591 | 14 | 581 |
| 55 | 5'-3' | 4255629  | 4255629  | 4255873  | 51942667  | 244 | 26 | 234 |
| 56 | 5'-3' | 4939324  | 4939324  | 4939762  | 52626362  | 438 | 30 | 428 |
| 57 | 5'-3' | 8636914  | 8636914  | 8637191  | 56323952  | 277 | 7  | 267 |
| 58 | 5'-3' | 9915493  | 9915493  | 9915902  | 57602531  | 409 | 13 | 399 |
| 59 | 5'-3' | 13756207 | 13756207 | 13756656 | 61443245  | 449 | 26 | 439 |
| 60 | 5'-3' | 14959707 | 14959707 | 14960040 | 62646745  | 333 | 29 | 323 |
| 61 | 5'-3' | 22559184 | 22559184 | 22559583 | 70246222  | 399 | 30 | 389 |
| 62 | 5'-3' | 24762350 | 24762350 | 24762756 | 72449388  | 406 | 19 | 396 |
| 63 | 5'-3' | 29260196 | 29260196 | 29260644 | 76947234  | 448 | 11 | 438 |
| 64 | 5'-3' | 29400439 | 29400439 | 29400861 | 77087477  | 422 | 25 | 412 |
| 65 | 5'-3' | 37538364 | 37538364 | 37538517 | 85225402  | 153 | 19 | 143 |
| 66 | 5'-3' | 44631506 | 44631506 | 44631715 | 92318544  | 209 | 11 | 199 |
| 67 | 5'-3' | 47299829 | 47299829 | 47300332 | 94986867  | 503 | 27 | 493 |
| 68 | 5'-3' | 48760533 | 48760533 | 48760905 | 96447571  | 372 | 14 | 362 |
| 69 | 5'-3' | 48931038 | 48931038 | 48931288 | 96618076  | 250 | 9  | 240 |
| 70 | 5'-3' | 51534325 | 51534325 | 51534843 | 99221363  | 518 | 30 | 508 |
| 71 | 5'-3' | 53997891 | 53997891 | 53998188 | 101684929 | 297 | 27 | 287 |
| 72 | 5'-3' | 57872032 | 57872032 | 57872297 | 105559070 | 265 | 21 | 255 |
| 73 | 5'-3' | 58754899 | 58754899 | 58755295 | 106441937 | 396 | 9  | 386 |
| 74 | 5'-3' | 59028401 | 59028401 | 59028815 | 106715439 | 414 | 27 | 404 |
| 75 | 5'-3' | 60803170 | 60803170 | 60803319 | 108490208 | 149 | 13 | 139 |
| 76 | 5'-3' | 62703332 | 62703332 | 62703697 | 110390370 | 365 | 9  | 355 |
| 77 | 5'-3' | 62826761 | 62826761 | 62826911 | 110513799 | 150 | 16 | 140 |
| 78 | 5'-3' | 68345955 | 68345955 | 68346368 | 116032993 | 413 | 22 | 403 |
| 79 | 5'-3' | 72325203 | 72325203 | 72325459 | 120012241 | 256 | 23 | 246 |
| 80 | 5'-3' | 72891211 | 72891211 | 72891652 | 120578249 | 441 | 23 | 431 |
| 81 | 5'-3' | 73400636 | 73400636 | 73401012 | 121087674 | 376 | 16 | 366 |

|     |       |          |          |          |           |     |    |     |
|-----|-------|----------|----------|----------|-----------|-----|----|-----|
| 82  | 3'-5' | 941379   | 941850   | 942012   | 48628417  | 162 | 18 | 152 |
| 83  | 3'-5' | 4148052  | 4148265  | 4148685  | 51835090  | 420 | 32 | 410 |
| 84  | 3'-5' | 6866657  | 6866833  | 6867290  | 54553695  | 457 | 30 | 447 |
| 85  | 3'-5' | 9171121  | 9171300  | 9171754  | 56858159  | 454 | 7  | 444 |
| 86  | 3'-5' | 11557411 | 11557665 | 11558044 | 59244449  | 379 | 8  | 369 |
| 87  | 3'-5' | 12299331 | 12299533 | 12299964 | 59986369  | 431 | 11 | 421 |
| 88  | 3'-5' | 13039410 | 13039666 | 13040043 | 60726448  | 377 | 9  | 367 |
| 89  | 3'-5' | 14037327 | 14037744 | 14037960 | 61724365  | 216 | 32 | 206 |
| 90  | 3'-5' | 19698901 | 19699152 | 19699534 | 67385939  | 382 | 9  | 372 |
| 91  | 3'-5' | 19804846 | 19805023 | 19805479 | 67491884  | 456 | 12 | 446 |
| 92  | 3'-5' | 22151094 | 22151350 | 22151727 | 69838132  | 377 | 32 | 367 |
| 93  | 3'-5' | 25546980 | 25547119 | 25547613 | 73234018  | 494 | 21 | 484 |
| 94  | 3'-5' | 26370701 | 26370883 | 26371334 | 74057739  | 451 | 17 | 441 |
| 95  | 3'-5' | 28537566 | 28537668 | 28538199 | 76224604  | 531 | 32 | 521 |
| 96  | 3'-5' | 30296483 | 30296764 | 30297116 | 77983521  | 352 | 6  | 342 |
| 97  | 3'-5' | 30777144 | 30777395 | 30777777 | 78464182  | 382 | 29 | 372 |
| 98  | 3'-5' | 32329120 | 32329428 | 32329753 | 80016158  | 325 | 29 | 315 |
| 99  | 3'-5' | 32963551 | 32963905 | 32964184 | 80650589  | 279 | 27 | 269 |
| 100 | 3'-5' | 33333772 | 33333904 | 33334405 | 81020810  | 501 | 19 | 491 |
| 101 | 3'-5' | 33426598 | 33426753 | 33427231 | 81113636  | 478 | 12 | 468 |
| 102 | 3'-5' | 36246599 | 36246971 | 36247232 | 83933637  | 261 | 11 | 251 |
| 103 | 3'-5' | 37158665 | 37158927 | 37159298 | 84845703  | 371 | 15 | 361 |
| 104 | 3'-5' | 42037991 | 42038195 | 42038624 | 89725029  | 429 | 11 | 419 |
| 105 | 3'-5' | 47423597 | 47423796 | 47424230 | 95110635  | 434 | 23 | 424 |
| 106 | 3'-5' | 48521326 | 48521613 | 48521959 | 96208364  | 346 | 24 | 336 |
| 107 | 3'-5' | 49967472 | 49967728 | 49968105 | 97654510  | 377 | 22 | 367 |
| 108 | 3'-5' | 50317597 | 50317787 | 50318230 | 98004635  | 443 | 24 | 433 |
| 109 | 3'-5' | 51017659 | 51017993 | 51018292 | 98704697  | 299 | 29 | 289 |
| 110 | 3'-5' | 51257823 | 51257982 | 51258456 | 98944861  | 474 | 17 | 464 |
| 111 | 3'-5' | 52537026 | 52537326 | 52537659 | 100224064 | 333 | 30 | 323 |
| 112 | 3'-5' | 54977355 | 54977761 | 54977988 | 102664393 | 227 | 6  | 217 |
| 113 | 3'-5' | 55127910 | 55127968 | 55128543 | 102814948 | 575 | 26 | 565 |
| 114 | 3'-5' | 55373204 | 55373417 | 55373837 | 103060242 | 420 | 30 | 410 |
| 115 | 3'-5' | 61670979 | 61671170 | 61671612 | 109358017 | 442 | 16 | 432 |
| 116 | 3'-5' | 63058605 | 63058922 | 63059238 | 110745643 | 316 | 14 | 306 |
| 117 | 3'-5' | 65576796 | 65576869 | 65577429 | 113263834 | 560 | 8  | 550 |
| 118 | 3'-5' | 65601390 | 65601573 | 65602023 | 113288428 | 450 | 27 | 440 |

|     |       |          |          |          |           |     |    |     |
|-----|-------|----------|----------|----------|-----------|-----|----|-----|
| 119 | 3'-5' | 67621552 | 67621836 | 67622185 | 115308590 | 349 | 26 | 339 |
| 120 | 3'-5' | 67632940 | 67633242 | 67633573 | 115319978 | 331 | 10 | 321 |
| 121 | 3'-5' | 67685383 | 67685463 | 67686016 | 115372421 | 553 | 14 | 543 |
| 122 | 3'-5' | 68368124 | 68368492 | 68368757 | 116055162 | 265 | 18 | 255 |
| 123 | 3'-5' | 71698931 | 71699409 | 71699564 | 119385969 | 155 | 7  | 145 |
| 124 | 3'-5' | 74914462 | 74914707 | 74915095 | 122601500 | 388 | 28 | 378 |
| 125 | 3'-5' | 82672416 | 82672580 | 82673049 | 130359454 | 469 | 32 | 459 |
| 126 | 3'-5' | 83971945 | 83972230 | 83972578 | 131658983 | 348 | 26 | 338 |
| 127 | 3'-5' | 84856225 | 84856467 | 84856858 | 132543263 | 391 | 19 | 381 |
| 128 | 3'-5' | 85125709 | 85126132 | 85126342 | 132812747 | 210 | 26 | 200 |
| 129 | 3'-5' | 87540714 | 87541013 | 87541347 | 135227752 | 334 | 9  | 324 |

NT\_039360.7 (4)

|     |       |         |         |         |           |     |    |     |
|-----|-------|---------|---------|---------|-----------|-----|----|-----|
| 130 | 5'-3' | 1884596 | 1884596 | 1884953 | 141546028 | 357 | 6  | 347 |
| 131 | 5'-3' | 3312882 | 3312882 | 3313081 | 142974314 | 199 | 14 | 189 |
| 132 | 3'-5' | 1264376 | 1264648 | 1265009 | 140925808 | 361 | 14 | 351 |
| 133 | 3'-5' | 1672519 | 1672650 | 1673152 | 141333951 | 502 | 14 | 492 |
| 134 | 3'-5' | 5126861 | 5126993 | 5127494 | 144788293 | 501 | 19 | 491 |

Nt\_039361.6 (5)

|     |       |         |         |         |           |     |    |     |
|-----|-------|---------|---------|---------|-----------|-----|----|-----|
| 135 | 5'-3' | 981793  | 981793  | 982161  | 147000322 | 368 | 8  | 358 |
| 136 | 5'-3' | 2827905 | 2827905 | 2828206 | 148846434 | 301 | 25 | 291 |
| 137 | 3'-5' | 520196  | 520452  | 520829  | 146538725 | 377 | 34 | 367 |

7

NT\_039413.7 (1)

|    |       |         |         |         |         |     |    |     |
|----|-------|---------|---------|---------|---------|-----|----|-----|
| 0  | 5'-3' | 124148  | 124148  | 124489  | 3124148 | 341 | 14 | 331 |
| 1  | 5'-3' | 3552464 | 3552464 | 3552888 | 6552464 | 424 | 29 | 414 |
| 2  | 5'-3' | 4065305 | 4065305 | 4065674 | 7065305 | 369 | 9  | 359 |
| 3  | 5'-3' | 5258601 | 5258601 | 5258991 | 8258601 | 390 | 11 | 380 |
| 4  | 5'-3' | 5570852 | 5570852 | 5571239 | 8570852 | 387 | 11 | 377 |
| 5  | 5'-3' | 5758557 | 5758557 | 5758944 | 8758557 | 387 | 11 | 377 |
| 6  | 5'-3' | 5960473 | 5960473 | 5960861 | 8960473 | 388 | 11 | 378 |
| 7  | 5'-3' | 6058179 | 6058179 | 6058569 | 9058179 | 390 | 11 | 380 |
| 8  | 5'-3' | 6213863 | 6213863 | 6214251 | 9213863 | 388 | 11 | 378 |
| 9  | 5'-3' | 6257906 | 6257906 | 6258293 | 9257906 | 387 | 11 | 377 |
| 10 | 5'-3' | 6364502 | 6364502 | 6364892 | 9364502 | 390 | 11 | 380 |
| 11 | 5'-3' | 6644408 | 6644408 | 6644798 | 9644408 | 390 | 11 | 380 |



|    |       |          |          |          |          |     |    |     |
|----|-------|----------|----------|----------|----------|-----|----|-----|
| 12 | 5'-3' | 6716000  | 6716000  | 6716387  | 9716000  | 387 | 11 | 377 |
| 13 | 5'-3' | 6933134  | 6933134  | 6933522  | 9933134  | 388 | 11 | 378 |
| 14 | 5'-3' | 6977237  | 6977237  | 6977624  | 9977237  | 387 | 11 | 377 |
| 15 | 5'-3' | 7083850  | 7083850  | 7084240  | 10083850 | 390 | 11 | 380 |
| 16 | 5'-3' | 7104553  | 7104553  | 7104943  | 10104553 | 390 | 11 | 380 |
| 17 | 5'-3' | 9452470  | 9452470  | 9452855  | 12452470 | 385 | 22 | 375 |
| 18 | 5'-3' | 17138548 | 17138548 | 17138808 | 20138548 | 260 | 17 | 250 |
| 19 | 5'-3' | 17157627 | 17157627 | 17157880 | 20157627 | 253 | 22 | 243 |
| 20 | 5'-3' | 23292602 | 23292602 | 23292963 | 26292602 | 361 | 22 | 351 |
| 21 | 5'-3' | 29265322 | 29265322 | 29265922 | 32265322 | 600 | 13 | 590 |
| 22 | 5'-3' | 32177667 | 32177667 | 32178062 | 35177667 | 395 | 20 | 385 |
| 23 | 5'-3' | 33985417 | 33985417 | 33985862 | 36985417 | 445 | 30 | 435 |
| 24 | 3'-5' | 1175805  | 1176161  | 1176438  | 4175805  | 277 | 12 | 267 |
| 25 | 3'-5' | 1551693  | 1552123  | 1552326  | 4551693  | 203 | 32 | 193 |
| 26 | 3'-5' | 2478045  | 2478290  | 2478678  | 5478045  | 388 | 11 | 378 |
| 27 | 3'-5' | 4139387  | 4139617  | 4140020  | 7139387  | 403 | 12 | 393 |
| 28 | 3'-5' | 4276756  | 4276999  | 4277389  | 7276756  | 390 | 11 | 380 |
| 29 | 3'-5' | 4426056  | 4426301  | 4426689  | 7426056  | 388 | 11 | 378 |
| 30 | 3'-5' | 4539016  | 4539259  | 4539649  | 7539016  | 390 | 11 | 380 |
| 31 | 3'-5' | 4635348  | 4635593  | 4635981  | 7635348  | 388 | 11 | 378 |
| 32 | 3'-5' | 4840959  | 4841205  | 4841592  | 7840959  | 387 | 11 | 377 |
| 33 | 3'-5' | 5074941  | 5075187  | 5075574  | 8074941  | 387 | 11 | 377 |
| 34 | 3'-5' | 7273138  | 7273384  | 7273771  | 10273138 | 387 | 11 | 377 |
| 35 | 3'-5' | 7413694  | 7413937  | 7414327  | 10413694 | 390 | 11 | 380 |
| 36 | 3'-5' | 7526833  | 7527079  | 7527466  | 10526833 | 387 | 11 | 377 |
| 37 | 3'-5' | 7570853  | 7571098  | 7571486  | 10570853 | 388 | 11 | 378 |
| 38 | 3'-5' | 7684412  | 7684654  | 7685045  | 10684412 | 391 | 11 | 381 |
| 39 | 3'-5' | 7911494  | 7911742  | 7912127  | 10911494 | 385 | 25 | 375 |
| 40 | 3'-5' | 10043378 | 10043673 | 10044011 | 13043378 | 338 | 20 | 328 |
| 41 | 3'-5' | 10927170 | 10927556 | 10927803 | 13927170 | 247 | 16 | 237 |
| 42 | 3'-5' | 21452258 | 21452508 | 21452891 | 24452258 | 383 | 10 | 373 |
| 43 | 3'-5' | 27066980 | 27067461 | 27067613 | 30066980 | 152 | 7  | 142 |
| 44 | 3'-5' | 29430354 | 29430507 | 29430987 | 32430354 | 480 | 6  | 470 |
| 45 | 3'-5' | 31240126 | 31240351 | 31240759 | 34240126 | 408 | 27 | 398 |
| 46 | 3'-5' | 35816985 | 35817008 | 35817618 | 38816985 | 610 | 22 | 600 |

|    |       |          |          |          |          |     |    |     |
|----|-------|----------|----------|----------|----------|-----|----|-----|
| 47 | 5'-3' | 4913713  | 4913713  | 4914274  | 51269907 | 561 | 25 | 551 |
| 48 | 5'-3' | 8465502  | 8465502  | 8465842  | 54821696 | 340 | 26 | 330 |
| 49 | 5'-3' | 8511565  | 8511565  | 8511905  | 54867759 | 340 | 26 | 330 |
| 50 | 5'-3' | 8867418  | 8867418  | 8867617  | 55223612 | 199 | 31 | 189 |
| 51 | 5'-3' | 9478770  | 9478770  | 9479116  | 55834964 | 346 | 17 | 336 |
| 52 | 5'-3' | 14749689 | 14749689 | 14750053 | 61105883 | 364 | 29 | 354 |
| 53 | 5'-3' | 15962634 | 15962634 | 15962995 | 62318828 | 361 | 24 | 351 |
| 54 | 5'-3' | 18213867 | 18213867 | 18214277 | 64570061 | 410 | 12 | 400 |
| 55 | 3'-5' | 8708530  | 8708824  | 8709163  | 55064724 | 339 | 31 | 329 |
| 56 | 3'-5' | 12995777 | 12996162 | 12996410 | 59351971 | 248 | 7  | 238 |
| 57 | 3'-5' | 13242320 | 13242579 | 13242953 | 59598514 | 374 | 31 | 364 |
| 58 | 3'-5' | 15483906 | 15484246 | 15484539 | 61840100 | 293 | 25 | 283 |
| 59 | 3'-5' | 17459422 | 17459688 | 17460055 | 63815616 | 367 | 11 | 357 |
| 60 | 3'-5' | 18985123 | 18985531 | 18985756 | 65341317 | 225 | 22 | 215 |
| 61 | 3'-5' | 19260928 | 19261124 | 19261561 | 65617122 | 437 | 14 | 427 |
| 62 | 3'-5' | 20183450 | 20183702 | 20184083 | 66539644 | 381 | 23 | 371 |

NT\_039428.7 (3)

|    |       |          |          |          |          |     |    |     |
|----|-------|----------|----------|----------|----------|-----|----|-----|
| 63 | 5'-3' | 2950767  | 2950767  | 2951233  | 69952972 | 466 | 21 | 456 |
| 64 | 5'-3' | 8923599  | 8923599  | 8924109  | 75925804 | 510 | 9  | 500 |
| 65 | 5'-3' | 9831923  | 9831923  | 9832307  | 76834128 | 384 | 23 | 374 |
| 66 | 5'-3' | 9896812  | 9896812  | 9897286  | 76899017 | 474 | 22 | 464 |
| 67 | 5'-3' | 10295237 | 10295237 | 10295547 | 77297442 | 310 | 13 | 300 |
| 68 | 5'-3' | 12229544 | 12229544 | 12230059 | 79231749 | 515 | 27 | 505 |
| 69 | 5'-3' | 12315351 | 12315351 | 12315711 | 79317556 | 360 | 16 | 350 |
| 70 | 5'-3' | 14549559 | 14549559 | 14549831 | 81551764 | 272 | 18 | 262 |
| 71 | 5'-3' | 17045877 | 17045877 | 17046092 | 84048082 | 215 | 27 | 205 |
| 72 | 5'-3' | 18307225 | 18307225 | 18307607 | 85309430 | 382 | 29 | 372 |
| 73 | 5'-3' | 21318709 | 21318709 | 21319210 | 88320914 | 501 | 15 | 491 |
| 74 | 5'-3' | 21532638 | 21532638 | 21533017 | 88534843 | 379 | 6  | 369 |
| 75 | 5'-3' | 21562396 | 21562396 | 21562814 | 88564601 | 418 | 12 | 408 |
| 76 | 3'-5' | 159097   | 159307   | 159730   | 67161302 | 423 | 20 | 413 |
| 77 | 3'-5' | 186457   | 186740   | 187090   | 67188662 | 350 | 16 | 340 |
| 78 | 3'-5' | 441914   | 442148   | 442547   | 67444119 | 399 | 8  | 389 |
| 79 | 3'-5' | 916924   | 917175   | 917557   | 67919129 | 382 | 8  | 372 |
| 80 | 3'-5' | 2149704  | 2149958  | 2150337  | 69151909 | 379 | 27 | 369 |
| 81 | 3'-5' | 2920890  | 2921156  | 2921523  | 69923095 | 367 | 11 | 357 |

|    |       |          |          |          |          |     |    |     |
|----|-------|----------|----------|----------|----------|-----|----|-----|
| 82 | 3'-5' | 2971487  | 2971807  | 2972120  | 69973692 | 313 | 16 | 303 |
| 83 | 3'-5' | 11108614 | 11108840 | 11109247 | 78110819 | 407 | 21 | 397 |
| 84 | 3'-5' | 12695648 | 12695909 | 12696281 | 79697853 | 372 | 25 | 362 |
| 85 | 3'-5' | 12909514 | 12909827 | 12910147 | 79911719 | 320 | 28 | 310 |
| 86 | 3'-5' | 16514694 | 16514870 | 16515327 | 83516899 | 457 | 27 | 447 |
| 87 | 3'-5' | 16858757 | 16858970 | 16859390 | 83860962 | 420 | 9  | 410 |
| 88 | 3'-5' | 17267567 | 17267853 | 17268200 | 84269772 | 347 | 32 | 337 |
| 89 | 3'-5' | 17353668 | 17353756 | 17354301 | 84355873 | 545 | 32 | 535 |
| 90 | 3'-5' | 21717797 | 21717952 | 21718430 | 88720002 | 478 | 16 | 468 |

NT\_039433.7 (4)

|     |       |          |          |          |           |     |    |     |
|-----|-------|----------|----------|----------|-----------|-----|----|-----|
| 91  | 5'-3' | 826098   | 826098   | 826561   | 90225931  | 463 | 11 | 453 |
| 92  | 5'-3' | 1874946  | 1874946  | 1875336  | 91274779  | 390 | 9  | 380 |
| 93  | 5'-3' | 3909868  | 3909868  | 3910394  | 93309701  | 526 | 10 | 516 |
| 94  | 5'-3' | 4545153  | 4545153  | 4545528  | 93944986  | 375 | 23 | 365 |
| 95  | 5'-3' | 5631456  | 5631456  | 5631932  | 95031289  | 476 | 19 | 466 |
| 96  | 5'-3' | 10249776 | 10249776 | 10249959 | 99649609  | 183 | 7  | 173 |
| 97  | 5'-3' | 11885567 | 11885567 | 11885907 | 101285400 | 340 | 26 | 330 |
| 98  | 5'-3' | 13475631 | 13475631 | 13476055 | 102875464 | 424 | 28 | 414 |
| 99  | 5'-3' | 14044063 | 14044063 | 14044383 | 103443896 | 320 | 30 | 310 |
| 100 | 5'-3' | 16087566 | 16087566 | 16087786 | 105487399 | 220 | 9  | 210 |
| 101 | 5'-3' | 21258411 | 21258411 | 21258892 | 110658244 | 481 | 25 | 471 |
| 102 | 5'-3' | 24338505 | 24338505 | 24338942 | 113738338 | 437 | 30 | 427 |
| 103 | 5'-3' | 24642977 | 24642977 | 24643411 | 114042810 | 434 | 27 | 424 |
| 104 | 5'-3' | 31515825 | 31515825 | 31516140 | 120915658 | 315 | 9  | 305 |
| 105 | 5'-3' | 32742669 | 32742669 | 32743056 | 122142502 | 387 | 11 | 377 |
| 106 | 5'-3' | 33133858 | 33133858 | 33134409 | 122533691 | 551 | 25 | 541 |
| 107 | 5'-3' | 35225765 | 35225765 | 35226102 | 124625598 | 337 | 16 | 327 |
| 108 | 5'-3' | 48059515 | 48059515 | 48059934 | 137459348 | 419 | 18 | 409 |
| 109 | 5'-3' | 49811510 | 49811510 | 49811764 | 139211343 | 254 | 14 | 244 |
| 110 | 3'-5' | 104770   | 104994   | 105403   | 89504603  | 409 | 18 | 399 |
| 111 | 3'-5' | 5062053  | 5062270  | 5062686  | 94461886  | 416 | 21 | 406 |
| 112 | 3'-5' | 7129032  | 7129170  | 7129665  | 96528865  | 495 | 15 | 485 |
| 113 | 3'-5' | 8847743  | 8848008  | 8848376  | 98247576  | 368 | 9  | 358 |
| 114 | 3'-5' | 9384715  | 9385130  | 9385348  | 98784548  | 218 | 7  | 208 |
| 115 | 3'-5' | 10447775 | 10447861 | 10448408 | 99847608  | 547 | 20 | 537 |
| 116 | 3'-5' | 15748330 | 15748598 | 15748963 | 105148163 | 365 | 19 | 355 |

|     |       |                 |          |          |           |     |    |     |
|-----|-------|-----------------|----------|----------|-----------|-----|----|-----|
| 117 | 3'-5' | 16992070        | 16992450 | 16992703 | 106391903 | 253 | 29 | 243 |
| 118 | 3'-5' | 19639470        | 19639877 | 19640103 | 109039303 | 226 | 27 | 216 |
| 119 | 3'-5' | 21549931        | 21550202 | 21550564 | 110949764 | 362 | 26 | 352 |
| 120 | 3'-5' | 21743570        | 21743821 | 21744203 | 111143403 | 382 | 34 | 372 |
| 121 | 3'-5' | 25903223        | 25903497 | 25903856 | 115303056 | 359 | 24 | 349 |
| 122 | 3'-5' | 25999505        | 25999771 | 26000138 | 115399338 | 367 | 24 | 357 |
| 123 | 3'-5' | 27744119        | 27744400 | 27744752 | 117143952 | 352 | 22 | 342 |
| 124 | 3'-5' | 29134152        | 29134403 | 29134785 | 118533985 | 382 | 15 | 372 |
| 125 | 3'-5' | 34399061        | 34399412 | 34399694 | 123798894 | 282 | 32 | 272 |
| 126 | 3'-5' | 37164634        | 37165071 | 37165267 | 126564467 | 196 | 24 | 186 |
| 127 | 3'-5' | 38199587        | 38199901 | 38200220 | 127599420 | 319 | 18 | 309 |
| 128 | 3'-5' | 38342552        | 38342680 | 38343185 | 127742385 | 505 | 22 | 495 |
| 129 | 3'-5' | 39062210        | 39062475 | 39062843 | 128462043 | 368 | 22 | 358 |
| 130 | 3'-5' | 40460628        | 40461051 | 40461261 | 129860461 | 210 | 12 | 200 |
| 131 | 3'-5' | 41015301        | 41015519 | 41015934 | 130415134 | 415 | 13 | 405 |
| 132 | 3'-5' | 41105115        | 41105364 | 41105748 | 130504948 | 384 | 19 | 374 |
| 133 | 3'-5' | 43105348        | 43105506 | 43105981 | 132505181 | 475 | 12 | 465 |
| 134 | 3'-5' | 51136563        | 51136982 | 51137196 | 140536396 | 214 | 11 | 204 |
| 135 | 3'-5' | 54945099        | 54945351 | 54945732 | 144344932 | 381 | 8  | 371 |
| 136 | 3'-5' | 55624230        | 55624539 | 55624863 | 145024063 | 324 | 15 | 314 |
| 137 | 3'-5' | 56649905        | 56650131 | 56650538 | 146049738 | 407 | 20 | 397 |
|     |       | NT_166306.1 (5) |          |          |           |     |    |     |
| 138 | 3'-5' | 2254468         | 2254535  | 2255101  | 148502626 | 566 | 9  | 556 |
|     |       | NT_039437.7 (6) |          |          |           |     |    |     |
| 139 | 3'-5' | 2369260         | 2369454  | 2369893  | 151299776 | 439 | 32 | 429 |
| 140 | 3'-5' | 2536766         | 2537036  | 2537399  | 151467282 | 363 | 23 | 353 |
|     |       | NT_039455.7 (1) |          |          |           |     |    |     |
| 0   | 5'-3' | 798673          | 798673   | 799022   | 3798673   | 349 | 16 | 339 |
| 1   | 5'-3' | 3488154         | 3488154  | 3488489  | 6488154   | 335 | 31 | 325 |
| 2   | 5'-3' | 4221184         | 4221184  | 4221427  | 7221184   | 243 | 29 | 233 |
| 3   | 5'-3' | 4499670         | 4499670  | 4500023  | 7499670   | 353 | 14 | 343 |
| 4   | 5'-3' | 5695817         | 5695817  | 5696265  | 8695817   | 448 | 23 | 438 |
| 5   | 5'-3' | 7143803         | 7143803  | 7144204  | 10143803  | 401 | 25 | 391 |
| 6   | 5'-3' | 9618341         | 9618341  | 9618749  | 12618341  | 408 | 28 | 398 |

|    |       |          |          |          |          |     |    |     |
|----|-------|----------|----------|----------|----------|-----|----|-----|
| 7  | 5'-3' | 12480602 | 12480602 | 12481053 | 15480602 | 451 | 21 | 441 |
| 8  | 5'-3' | 17028053 | 17028053 | 17028414 | 20028053 | 361 | 16 | 351 |
| 9  | 3'-5' | 3092120  | 3092350  | 3092753  | 6092120  | 403 | 10 | 393 |
| 10 | 3'-5' | 3217784  | 3218057  | 3218417  | 6217784  | 360 | 7  | 350 |
| 11 | 3'-5' | 5003037  | 5003329  | 5003670  | 8003037  | 341 | 21 | 331 |
| 12 | 3'-5' | 5724305  | 5724783  | 5724938  | 8724305  | 155 | 18 | 145 |
| 13 | 3'-5' | 8837920  | 8837999  | 8838553  | 11837920 | 554 | 26 | 544 |
| 14 | 3'-5' | 13285426 | 13285903 | 13286059 | 16285426 | 156 | 29 | 146 |
| 15 | 3'-5' | 14025707 | 14026008 | 14026340 | 17025707 | 332 | 34 | 322 |
| 16 | 3'-5' | 14931340 | 14931732 | 14931973 | 17931340 | 241 | 32 | 231 |
| 17 | 3'-5' | 15401736 | 15401909 | 15402369 | 18401736 | 460 | 17 | 450 |
| 18 | 3'-5' | 15580998 | 15581243 | 15581631 | 18580998 | 388 | 10 | 378 |

NT\_039457.7 (2)

|    |       |          |          |          |          |     |    |     |
|----|-------|----------|----------|----------|----------|-----|----|-----|
| 19 | 5'-3' | 1379401  | 1379401  | 1379613  | 23418114 | 212 | 22 | 202 |
| 20 | 5'-3' | 1678784  | 1678784  | 1679057  | 23717497 | 273 | 18 | 263 |
| 21 | 5'-3' | 2767148  | 2767148  | 2767461  | 24805861 | 313 | 6  | 303 |
| 22 | 5'-3' | 9132535  | 9132535  | 9132815  | 31171248 | 280 | 20 | 270 |
| 23 | 5'-3' | 11502550 | 11502550 | 11502769 | 33541263 | 219 | 30 | 209 |
| 24 | 5'-3' | 12954631 | 12954631 | 12954985 | 34993344 | 354 | 24 | 344 |
| 25 | 5'-3' | 14235655 | 14235655 | 14236154 | 36274368 | 499 | 24 | 489 |
| 26 | 5'-3' | 14473763 | 14473763 | 14474200 | 36512476 | 437 | 19 | 427 |
| 27 | 5'-3' | 16020556 | 16020556 | 16021116 | 38059269 | 560 | 22 | 550 |
| 28 | 5'-3' | 17323264 | 17323264 | 17323635 | 39361977 | 371 | 21 | 361 |
| 29 | 3'-5' | 1529679  | 1529941  | 1530312  | 23568392 | 371 | 30 | 361 |
| 30 | 3'-5' | 3422843  | 3423022  | 3423476  | 25461556 | 454 | 33 | 444 |
| 31 | 3'-5' | 4708841  | 4709165  | 4709474  | 26747554 | 309 | 12 | 299 |
| 32 | 3'-5' | 9511528  | 9511875  | 9512161  | 31550241 | 286 | 29 | 276 |
| 33 | 3'-5' | 10062333 | 10062581 | 10062966 | 32101046 | 385 | 9  | 375 |

NT\_039460.7 (3)

|    |       |         |         |         |          |     |    |     |
|----|-------|---------|---------|---------|----------|-----|----|-----|
| 34 | 5'-3' | 3307739 | 3307739 | 3308091 | 43545883 | 352 | 10 | 342 |
| 35 | 5'-3' | 3754462 | 3754462 | 3754894 | 43992606 | 432 | 13 | 422 |
| 36 | 5'-3' | 3810775 | 3810775 | 3811260 | 44048919 | 485 | 10 | 475 |
| 37 | 5'-3' | 5166815 | 5166815 | 5167117 | 45404959 | 302 | 21 | 292 |
| 38 | 5'-3' | 6219261 | 6219261 | 6219751 | 46457405 | 490 | 7  | 480 |
| 39 | 5'-3' | 6251144 | 6251144 | 6251603 | 46489288 | 459 | 8  | 449 |

|    |       |          |          |          |          |     |    |     |
|----|-------|----------|----------|----------|----------|-----|----|-----|
| 40 | 5'-3' | 6470534  | 6470534  | 6470998  | 46708678 | 464 | 17 | 454 |
| 41 | 5'-3' | 11237562 | 11237562 | 11237934 | 51475706 | 372 | 18 | 362 |
| 42 | 5'-3' | 12643360 | 12643360 | 12643749 | 52881504 | 389 | 31 | 379 |
| 43 | 5'-3' | 13495700 | 13495700 | 13495994 | 53733844 | 294 | 27 | 284 |
| 44 | 5'-3' | 14212962 | 14212962 | 14213347 | 54451106 | 385 | 19 | 375 |
| 45 | 5'-3' | 14885072 | 14885072 | 14885373 | 55123216 | 301 | 14 | 291 |
| 46 | 3'-5' | 3060267  | 3060333  | 3060900  | 43298411 | 567 | 14 | 557 |
| 47 | 3'-5' | 3739177  | 3739508  | 3739810  | 43977321 | 302 | 22 | 292 |
| 48 | 3'-5' | 5305546  | 5306017  | 5306179  | 45543690 | 162 | 9  | 152 |
| 49 | 3'-5' | 8003913  | 8004169  | 8004546  | 48242057 | 377 | 13 | 367 |
| 50 | 3'-5' | 8444784  | 8444966  | 8445417  | 48682928 | 451 | 28 | 441 |
| 51 | 3'-5' | 9361781  | 9362061  | 9362414  | 49599925 | 353 | 11 | 343 |
| 52 | 3'-5' | 9709144  | 9709393  | 9709777  | 49947288 | 384 | 34 | 374 |
| 53 | 3'-5' | 10003730 | 10003834 | 10004363 | 50241874 | 529 | 14 | 519 |
| 54 | 3'-5' | 10895024 | 10895368 | 10895657 | 51133168 | 289 | 10 | 279 |
| 55 | 3'-5' | 12159258 | 12159516 | 12159891 | 52397402 | 375 | 11 | 365 |
| 56 | 3'-5' | 14095715 | 14095907 | 14096348 | 54333859 | 441 | 8  | 431 |

NT\_039461.7 (4)

|    |       |         |         |         |          |     |    |     |
|----|-------|---------|---------|---------|----------|-----|----|-----|
| 57 | 5'-3' | 1981979 | 1981979 | 1982312 | 58361044 | 333 | 22 | 323 |
| 58 | 5'-3' | 2616368 | 2616368 | 2616717 | 58995433 | 349 | 27 | 339 |
| 59 | 5'-3' | 4228766 | 4228766 | 4229096 | 60607831 | 330 | 28 | 320 |
| 60 | 5'-3' | 6928189 | 6928189 | 6928511 | 63307254 | 322 | 10 | 312 |
| 61 | 5'-3' | 7231056 | 7231056 | 7231418 | 63610121 | 362 | 23 | 352 |
| 62 | 5'-3' | 8076563 | 8076563 | 8076902 | 64455628 | 339 | 23 | 329 |
| 63 | 5'-3' | 9281593 | 9281593 | 9281951 | 65660658 | 358 | 20 | 348 |
| 64 | 3'-5' | 1186905 | 1187249 | 1187538 | 57565970 | 289 | 7  | 279 |
| 65 | 3'-5' | 2010531 | 2010633 | 2011164 | 58389596 | 531 | 27 | 521 |
| 66 | 3'-5' | 6652235 | 6652466 | 6652868 | 63031300 | 402 | 28 | 392 |
| 67 | 3'-5' | 8204061 | 8204474 | 8204694 | 64583126 | 220 | 33 | 210 |

NT\_039462.7 (5)

|    |       |         |         |         |          |     |    |     |
|----|-------|---------|---------|---------|----------|-----|----|-----|
| 68 | 5'-3' | 1601573 | 1601573 | 1601933 | 67400091 | 360 | 23 | 350 |
| 69 | 5'-3' | 4358006 | 4358006 | 4358299 | 70156524 | 293 | 10 | 283 |
| 70 | 5'-3' | 5610776 | 5610776 | 5611005 | 71409294 | 229 | 19 | 219 |
| 71 | 3'-5' | 1867018 | 1867224 | 1867651 | 67665536 | 427 | 22 | 417 |
| 72 | 3'-5' | 5240679 | 5240943 | 5241312 | 71039197 | 369 | 8  | 359 |

|     |       |                 |          |          |           |     |    |     |
|-----|-------|-----------------|----------|----------|-----------|-----|----|-----|
| 73  | 3'-5' | 7351104         | 7351341  | 7351737  | 73149622  | 396 | 23 | 386 |
|     |       | NT_078575.6 (6) |          |          |           |     |    |     |
| 74  | 5'-3' | 1830597         | 1830597  | 1831109  | 75467243  | 512 | 6  | 502 |
| 75  | 5'-3' | 3888709         | 3888709  | 3889289  | 77525355  | 580 | 25 | 570 |
| 76  | 5'-3' | 5717011         | 5717011  | 5717375  | 79353657  | 364 | 8  | 354 |
| 77  | 5'-3' | 6412410         | 6412410  | 6412762  | 80049056  | 352 | 29 | 342 |
| 78  | 5'-3' | 6767090         | 6767090  | 6767579  | 80403736  | 489 | 19 | 479 |
| 79  | 5'-3' | 7657421         | 7657421  | 7657704  | 81294067  | 283 | 14 | 273 |
| 80  | 5'-3' | 8579382         | 8579382  | 8579812  | 82216028  | 430 | 12 | 420 |
| 81  | 5'-3' | 10265489        | 10265489 | 10265863 | 83902135  | 374 | 16 | 364 |
| 82  | 5'-3' | 17192424        | 17192424 | 17192799 | 90829070  | 375 | 17 | 365 |
| 83  | 5'-3' | 20009777        | 20009777 | 20010097 | 93646423  | 320 | 30 | 310 |
| 84  | 5'-3' | 21577391        | 21577391 | 21577787 | 95214037  | 396 | 7  | 386 |
| 85  | 5'-3' | 22643634        | 22643634 | 22643848 | 96280280  | 214 | 29 | 204 |
| 86  | 5'-3' | 23600892        | 23600892 | 23601213 | 97237538  | 321 | 7  | 311 |
| 87  | 5'-3' | 24278754        | 24278754 | 24279196 | 97915400  | 442 | 7  | 432 |
| 88  | 5'-3' | 25500208        | 25500208 | 25500622 | 99136854  | 414 | 21 | 404 |
| 89  | 5'-3' | 26447610        | 26447610 | 26447959 | 100084256 | 349 | 20 | 339 |
| 90  | 5'-3' | 26631180        | 26631180 | 26631587 | 100267826 | 407 | 25 | 397 |
| 91  | 5'-3' | 28131484        | 28131484 | 28131845 | 101768130 | 361 | 10 | 351 |
| 92  | 5'-3' | 30420825        | 30420825 | 30421209 | 104057471 | 384 | 13 | 374 |
| 93  | 5'-3' | 31966306        | 31966306 | 31966760 | 105602952 | 454 | 21 | 444 |
| 94  | 5'-3' | 34496414        | 34496414 | 34496806 | 108133060 | 392 | 17 | 382 |
| 95  | 5'-3' | 34661212        | 34661212 | 34661667 | 108297858 | 455 | 10 | 445 |
| 96  | 5'-3' | 40339845        | 40339845 | 40340202 | 113976491 | 357 | 22 | 347 |
| 97  | 5'-3' | 48982173        | 48982173 | 48982591 | 122618819 | 418 | 15 | 408 |
| 98  | 5'-3' | 53178506        | 53178506 | 53178912 | 126815152 | 406 | 13 | 396 |
| 99  | 5'-3' | 55841647        | 55841647 | 55842053 | 129478293 | 406 | 9  | 396 |
| 100 | 3'-5' | 937551          | 937953   | 938184   | 74574197  | 231 | 25 | 221 |
| 101 | 3'-5' | 1278551         | 1278817  | 1279184  | 74915197  | 367 | 21 | 357 |
| 102 | 3'-5' | 1484961         | 1485229  | 1485594  | 75121607  | 365 | 26 | 355 |
| 103 | 3'-5' | 1746785         | 1747094  | 1747418  | 75383431  | 324 | 14 | 314 |
| 104 | 3'-5' | 2041759         | 2042024  | 2042392  | 75678405  | 368 | 18 | 358 |
| 105 | 3'-5' | 5566537         | 5566676  | 5567170  | 79203183  | 494 | 22 | 484 |
| 106 | 3'-5' | 8667957         | 8668160  | 8668590  | 82304603  | 430 | 17 | 420 |
| 107 | 3'-5' | 13479575        | 13479918 | 13480208 | 87116221  | 290 | 30 | 280 |

|     |       |          |          |          |           |     |    |     |
|-----|-------|----------|----------|----------|-----------|-----|----|-----|
| 108 | 3'-5' | 24487268 | 24487643 | 24487901 | 98123914  | 258 | 12 | 248 |
| 109 | 3'-5' | 24677409 | 24677691 | 24678042 | 98314055  | 351 | 7  | 341 |
| 110 | 3'-5' | 25517642 | 25517902 | 25518275 | 99154288  | 373 | 26 | 363 |
| 111 | 3'-5' | 26388341 | 26388601 | 26388974 | 100024987 | 373 | 9  | 363 |
| 112 | 3'-5' | 27342086 | 27342340 | 27342719 | 100978732 | 379 | 12 | 369 |
| 113 | 3'-5' | 27791135 | 27791396 | 27791768 | 101427781 | 372 | 11 | 362 |
| 114 | 3'-5' | 34217740 | 34218064 | 34218373 | 107854386 | 309 | 21 | 299 |
| 115 | 3'-5' | 36337076 | 36337287 | 36337709 | 109973722 | 422 | 28 | 412 |
| 116 | 3'-5' | 38270643 | 38270955 | 38271276 | 111907289 | 321 | 26 | 311 |
| 117 | 3'-5' | 38646656 | 38646886 | 38647289 | 112283302 | 403 | 13 | 393 |
| 118 | 3'-5' | 40843895 | 40844009 | 40844528 | 114480541 | 519 | 17 | 509 |
| 119 | 3'-5' | 42620089 | 42620376 | 42620722 | 116256735 | 346 | 19 | 336 |
| 120 | 3'-5' | 44369654 | 44369902 | 44370287 | 118006300 | 385 | 16 | 375 |
| 121 | 3'-5' | 46347027 | 46347229 | 46347660 | 119983673 | 431 | 30 | 421 |
| 122 | 3'-5' | 55194362 | 55194609 | 55194995 | 128831008 | 386 | 19 | 376 |

9

|    |       |                 |         |         |          |     |    |     |
|----|-------|-----------------|---------|---------|----------|-----|----|-----|
|    |       | NT_039471.7 (1) |         |         |          |     |    |     |
| 0  | 5'-3' | 1721178         | 1721178 | 1721353 | 4721178  | 175 | 18 | 165 |
| 1  | 5'-3' | 1913244         | 1913244 | 1913411 | 4913244  | 167 | 27 | 157 |
| 2  | 5'-3' | 3013998         | 3013998 | 3014538 | 6013998  | 540 | 9  | 530 |
| 3  | 5'-3' | 3994726         | 3994726 | 3994896 | 6994726  | 170 | 9  | 160 |
| 4  | 5'-3' | 4137686         | 4137686 | 4138065 | 7137686  | 379 | 23 | 369 |
| 5  | 5'-3' | 5132266         | 5132266 | 5132499 | 8132266  | 233 | 24 | 223 |
| 6  | 5'-3' | 7125879         | 7125879 | 7126394 | 10125879 | 515 | 31 | 505 |
| 7  | 5'-3' | 7435332         | 7435332 | 7435641 | 10435332 | 309 | 28 | 299 |
| 8  | 5'-3' | 9590057         | 9590057 | 9590298 | 12590057 | 241 | 14 | 231 |
| 9  | 3'-5' | 526313          | 526405  | 526946  | 3526313  | 541 | 16 | 531 |
| 10 | 3'-5' | 1455699         | 1455930 | 1456332 | 4455699  | 402 | 12 | 392 |
| 11 | 3'-5' | 3454558         | 3454911 | 3455191 | 6454558  | 280 | 12 | 270 |
| 12 | 3'-5' | 6248699         | 6248966 | 6249332 | 9248699  | 366 | 11 | 356 |
| 13 | 3'-5' | 6859961         | 6860038 | 6860594 | 9859961  | 556 | 16 | 546 |
| 14 | 3'-5' | 8238010         | 8238260 | 8238643 | 11238010 | 383 | 22 | 373 |
| 15 | 3'-5' | 9481519         | 9481711 | 9482152 | 12481519 | 441 | 27 | 431 |
|    |       | NT_039472.7 (2) |         |         |          |     |    |     |
| 16 | 5'-3' | 1307591         | 1307591 | 1307990 | 14525114 | 399 | 30 | 389 |
| 17 | 5'-3' | 4694637         | 4694637 | 4695057 | 17912160 | 420 | 17 | 410 |



|    |       |                 |          |          |          |     |    |     |
|----|-------|-----------------|----------|----------|----------|-----|----|-----|
| 18 | 5'-3' | 5727588         | 5727588  | 5728064  | 18945111 | 476 | 15 | 466 |
| 19 | 5'-3' | 6711668         | 6711668  | 6712049  | 19929191 | 381 | 26 | 371 |
| 20 | 5'-3' | 9595412         | 9595412  | 9595731  | 22812935 | 319 | 8  | 309 |
| 21 | 5'-3' | 9975684         | 9975684  | 9976096  | 23193207 | 412 | 23 | 402 |
| 22 | 5'-3' | 11000935        | 11000935 | 11001285 | 24218458 | 350 | 26 | 340 |
| 23 | 5'-3' | 11806190        | 11806190 | 11806735 | 25023713 | 545 | 28 | 535 |
| 24 | 5'-3' | 17852642        | 17852642 | 17852983 | 31070165 | 341 | 21 | 331 |
| 25 | 5'-3' | 21507590        | 21507590 | 21507925 | 34725113 | 335 | 12 | 325 |
| 26 | 5'-3' | 24089855        | 24089855 | 24090218 | 37307378 | 363 | 7  | 353 |
| 27 | 5'-3' | 26026483        | 26026483 | 26027046 | 39244006 | 563 | 21 | 553 |
| 28 | 5'-3' | 38538620        | 38538620 | 38538999 | 51756143 | 379 | 13 | 369 |
| 29 | 3'-5' | 381855          | 382023   | 382488   | 13599378 | 465 | 17 | 455 |
| 30 | 3'-5' | 1091508         | 1091824  | 1092141  | 14309031 | 317 | 9  | 307 |
| 31 | 3'-5' | 2781874         | 2781928  | 2782507  | 15999397 | 579 | 7  | 569 |
| 32 | 3'-5' | 4174803         | 4175008  | 4175436  | 17392326 | 428 | 12 | 418 |
| 33 | 3'-5' | 5149159         | 5149408  | 5149792  | 18366682 | 384 | 10 | 374 |
| 34 | 3'-5' | 6619319         | 6619609  | 6619952  | 19836842 | 343 | 31 | 333 |
| 35 | 3'-5' | 6656495         | 6656811  | 6657128  | 19874018 | 317 | 6  | 307 |
| 36 | 3'-5' | 8750662         | 8750872  | 8751295  | 21968185 | 423 | 9  | 413 |
| 37 | 3'-5' | 11720636        | 11720921 | 11721269 | 24938159 | 348 | 22 | 338 |
| 38 | 3'-5' | 14703511        | 14703642 | 14704144 | 27921034 | 502 | 24 | 492 |
| 39 | 3'-5' | 16198649        | 16198863 | 16199282 | 29416172 | 419 | 17 | 409 |
| 40 | 3'-5' | 18673677        | 18673941 | 18674310 | 31891200 | 369 | 34 | 359 |
| 41 | 3'-5' | 22156028        | 22156423 | 22156661 | 35373551 | 238 | 23 | 228 |
| 42 | 3'-5' | 24417605        | 24417823 | 24418238 | 37635128 | 415 | 24 | 405 |
| 43 | 3'-5' | 25221575        | 25221853 | 25222208 | 38439098 | 355 | 13 | 345 |
| 44 | 3'-5' | 25848152        | 25848415 | 25848785 | 39065675 | 370 | 8  | 360 |
| 45 | 3'-5' | 28745588        | 28745949 | 28746221 | 41963111 | 272 | 34 | 262 |
| 46 | 3'-5' | 31441702        | 31441962 | 31442335 | 44659225 | 373 | 30 | 363 |
|    |       | NT_039474.7 (3) |          |          |          |     |    |     |
| 47 | 5'-3' | 724815          | 724815   | 725220   | 54304231 | 405 | 13 | 395 |
| 48 | 3'-5' | 885462          | 885683   | 886095   | 54464878 | 412 | 12 | 402 |
| 49 | 3'-5' | 1129066         | 1129317  | 1129699  | 54708482 | 382 | 21 | 372 |
|    |       | NT_039476.7 (4) |          |          |          |     |    |     |
| 50 | 5'-3' | 457204          | 457204   | 457590   | 80785374 | 386 | 15 | 376 |

|                 |       |          |          |          |           |     |    |     |
|-----------------|-------|----------|----------|----------|-----------|-----|----|-----|
| 51              | 5'-3' | 921671   | 921671   | 922065   | 81249841  | 394 | 17 | 384 |
| 52              | 5'-3' | 4580912  | 4580912  | 4581267  | 84909082  | 355 | 25 | 345 |
| 53              | 5'-3' | 6608387  | 6608387  | 6608779  | 86936557  | 392 | 26 | 382 |
| 54              | 5'-3' | 8212792  | 8212792  | 8213313  | 88540962  | 521 | 30 | 511 |
| 55              | 5'-3' | 10025510 | 10025510 | 10025876 | 90353680  | 366 | 14 | 356 |
| 56              | 5'-3' | 10106951 | 10106951 | 10107384 | 90435121  | 433 | 9  | 423 |
| 57              | 5'-3' | 13626236 | 13626236 | 13626687 | 93954406  | 451 | 12 | 441 |
| 58              | 5'-3' | 16276545 | 16276545 | 16276812 | 96604715  | 267 | 10 | 257 |
| 59              | 5'-3' | 17042935 | 17042935 | 17043281 | 97371105  | 346 | 9  | 336 |
| 60              | 5'-3' | 20407340 | 20407340 | 20407501 | 100735510 | 161 | 17 | 151 |
| 61              | 3'-5' | 244140   | 244328   | 244773   | 80572310  | 445 | 14 | 435 |
| 62              | 3'-5' | 2513230  | 2513489  | 2513863  | 82841400  | 374 | 31 | 364 |
| 63              | 3'-5' | 2726351  | 2726578  | 2726984  | 83054521  | 406 | 8  | 396 |
| 64              | 3'-5' | 8580060  | 8580172  | 8580693  | 88908230  | 521 | 30 | 511 |
| 65              | 3'-5' | 9559283  | 9559687  | 9559916  | 89887453  | 229 | 22 | 219 |
| 66              | 3'-5' | 10440318 | 10440400 | 10440951 | 90768488  | 551 | 22 | 541 |
| 67              | 3'-5' | 11017005 | 11017263 | 11017638 | 91345175  | 375 | 11 | 365 |
| 68              | 3'-5' | 12774842 | 12775060 | 12775475 | 93103012  | 415 | 11 | 405 |
| 69              | 3'-5' | 18397153 | 18397447 | 18397786 | 98725323  | 339 | 25 | 329 |
| 70              | 3'-5' | 20462985 | 20463229 | 20463618 | 100791155 | 389 | 23 | 379 |
| NT_039477.7 (5) |       |          |          |          |           |     |    |     |
| 71              | 5'-3' | 3643853  | 3643853  | 3644200  | 104638130 | 347 | 15 | 337 |
| 72              | 5'-3' | 3914399  | 3914399  | 3914900  | 104908676 | 501 | 7  | 491 |
| 73              | 3'-5' | 1522923  | 1523178  | 1523556  | 102517200 | 378 | 23 | 368 |
| 74              | 3'-5' | 3747775  | 3747985  | 3748408  | 104742052 | 423 | 29 | 413 |
| 75              | 3'-5' | 4486477  | 4486720  | 4487110  | 105480754 | 390 | 17 | 380 |
| NT_039482.7 (6) |       |          |          |          |           |     |    |     |
| 76              | 5'-3' | 241419   | 241419   | 241711   | 109055893 | 292 | 28 | 282 |
| 77              | 5'-3' | 917781   | 917781   | 918173   | 109732255 | 392 | 12 | 382 |
| 78              | 5'-3' | 3585010  | 3585010  | 3585428  | 112399484 | 418 | 21 | 408 |
| 79              | 5'-3' | 4327659  | 4327659  | 4328035  | 113142133 | 376 | 18 | 366 |
| 80              | 5'-3' | 4880275  | 4880275  | 4880661  | 113694749 | 386 | 21 | 376 |
| 81              | 5'-3' | 9154101  | 9154101  | 9154392  | 117968575 | 291 | 20 | 281 |
| 82              | 3'-5' | 5816335  | 5816496  | 5816968  | 114630809 | 472 | 31 | 462 |
| 83              | 3'-5' | 9794562  | 9794829  | 9795195  | 118609036 | 366 | 27 | 356 |

|    |       |          |          |          |           |     |    |     |
|----|-------|----------|----------|----------|-----------|-----|----|-----|
| 84 | 3'-5' | 10101476 | 10101524 | 10102109 | 118915950 | 585 | 12 | 575 |
| 85 | 3'-5' | 10487785 | 10488036 | 10488418 | 119302259 | 382 | 10 | 372 |
| 86 | 3'-5' | 12945559 | 12945798 | 12946192 | 121760033 | 394 | 8  | 384 |
| 87 | 3'-5' | 13173176 | 13173496 | 13173809 | 121987650 | 313 | 7  | 303 |

10

NT\_03490.7 (1)

|   |       |         |         |         |         |     |    |     |
|---|-------|---------|---------|---------|---------|-----|----|-----|
| 0 | 5'-3' | 737141  | 737141  | 737522  | 3737141 | 381 | 18 | 371 |
| 1 | 5'-3' | 984084  | 984084  | 984556  | 3984084 | 472 | 16 | 462 |
| 2 | 5'-3' | 1381290 | 1381290 | 1381540 | 4381290 | 250 | 7  | 240 |
| 3 | 5'-3' | 3165812 | 3165812 | 3166225 | 6165812 | 413 | 14 | 403 |
| 4 | 5'-3' | 4190169 | 4190169 | 4190628 | 7190169 | 459 | 10 | 449 |
| 5 | 3'-5' | 1431211 | 1431320 | 1431844 | 4431211 | 524 | 11 | 514 |
| 6 | 3'-5' | 1813346 | 1813665 | 1813979 | 4813346 | 314 | 9  | 304 |
| 7 | 3'-5' | 2090629 | 2090907 | 2091262 | 5090629 | 355 | 6  | 345 |
| 8 | 3'-5' | 3491364 | 3491649 | 3491997 | 6491364 | 348 | 21 | 338 |

NT\_039492.7 (2)

|    |       |          |          |          |          |     |    |     |
|----|-------|----------|----------|----------|----------|-----|----|-----|
| 9  | 5'-3' | 5340923  | 5340923  | 5341401  | 12637465 | 478 | 19 | 468 |
| 10 | 5'-3' | 11369726 | 11369726 | 11370047 | 18666268 | 321 | 14 | 311 |
| 11 | 5'-3' | 17456101 | 17456101 | 17456526 | 24752643 | 425 | 27 | 415 |
| 12 | 5'-3' | 20925371 | 20925371 | 20925741 | 28221913 | 370 | 27 | 360 |
| 13 | 5'-3' | 22375198 | 22375198 | 22375789 | 29671740 | 591 | 19 | 581 |
| 14 | 5'-3' | 25421579 | 25421579 | 25422089 | 32718121 | 510 | 9  | 500 |
| 15 | 5'-3' | 27681454 | 27681454 | 27681834 | 34977996 | 380 | 12 | 370 |
| 16 | 5'-3' | 27974353 | 27974353 | 27974736 | 35270895 | 383 | 23 | 373 |
| 17 | 5'-3' | 30181845 | 30181845 | 30182193 | 37478387 | 348 | 26 | 338 |
| 18 | 5'-3' | 30965028 | 30965028 | 30965478 | 38261570 | 450 | 18 | 440 |
| 19 | 5'-3' | 31783250 | 31783250 | 31783633 | 39079792 | 383 | 13 | 373 |
| 20 | 5'-3' | 32515367 | 32515367 | 32515988 | 39811909 | 621 | 29 | 611 |
| 21 | 5'-3' | 33919223 | 33919223 | 33919711 | 41215765 | 488 | 30 | 478 |
| 22 | 5'-3' | 34795513 | 34795513 | 34795876 | 42092055 | 363 | 20 | 353 |
| 23 | 5'-3' | 36643050 | 36643050 | 36643295 | 43939592 | 245 | 20 | 235 |
| 24 | 5'-3' | 38847967 | 38847967 | 38848350 | 46144509 | 383 | 25 | 373 |
| 25 | 5'-3' | 38850237 | 38850237 | 38850576 | 46146779 | 339 | 26 | 329 |
| 26 | 5'-3' | 41246019 | 41246019 | 41246150 | 48542561 | 131 | 17 | 121 |
| 27 | 5'-3' | 46373050 | 46373050 | 46373323 | 53669592 | 273 | 18 | 263 |
| 28 | 5'-3' | 47157634 | 47157634 | 47158129 | 54454176 | 495 | 18 | 485 |

|    |       |          |          |          |          |     |    |     |
|----|-------|----------|----------|----------|----------|-----|----|-----|
| 29 | 5'-3' | 47415509 | 47415509 | 47415854 | 54712051 | 345 | 30 | 335 |
| 30 | 5'-3' | 47634516 | 47634516 | 47634739 | 54931058 | 223 | 15 | 213 |
| 31 | 5'-3' | 49111779 | 49111779 | 49112108 | 56408321 | 329 | 12 | 319 |
| 32 | 3'-5' | 3327043  | 3327452  | 3327676  | 10623585 | 224 | 22 | 214 |
| 33 | 3'-5' | 4102616  | 4102927  | 4103249  | 11399158 | 322 | 13 | 312 |
| 34 | 3'-5' | 8914747  | 8914997  | 8915380  | 16211289 | 383 | 31 | 373 |
| 35 | 3'-5' | 9659687  | 9659988  | 9660320  | 16956229 | 332 | 32 | 322 |
| 36 | 3'-5' | 12666058 | 12666416 | 12666691 | 19962600 | 275 | 18 | 265 |
| 37 | 3'-5' | 13784254 | 13784482 | 13784887 | 21080796 | 405 | 26 | 395 |
| 38 | 3'-5' | 15259113 | 15259514 | 15259746 | 22555655 | 232 | 14 | 222 |
| 39 | 3'-5' | 16233580 | 16233785 | 16234213 | 23530122 | 428 | 11 | 418 |
| 40 | 3'-5' | 18576441 | 18576869 | 18577074 | 25872983 | 205 | 6  | 195 |
| 41 | 3'-5' | 20160852 | 20161049 | 20161485 | 27457394 | 436 | 11 | 426 |
| 42 | 3'-5' | 20650049 | 20650298 | 20650682 | 27946591 | 384 | 28 | 374 |
| 43 | 3'-5' | 21781865 | 21782086 | 21782498 | 29078407 | 412 | 18 | 402 |
| 44 | 3'-5' | 21904003 | 21904238 | 21904636 | 29200545 | 398 | 31 | 388 |
| 45 | 3'-5' | 23227845 | 23228076 | 23228478 | 30524387 | 402 | 9  | 392 |
| 46 | 3'-5' | 24066901 | 24066943 | 24067534 | 31363443 | 591 | 25 | 581 |
| 47 | 3'-5' | 24839129 | 24839447 | 24839762 | 32135671 | 315 | 30 | 305 |
| 48 | 3'-5' | 25118161 | 25118451 | 25118794 | 32414703 | 343 | 19 | 333 |
| 49 | 3'-5' | 25196265 | 25196540 | 25196898 | 32492807 | 358 | 34 | 348 |
| 50 | 3'-5' | 25760305 | 25760632 | 25760938 | 33056847 | 306 | 9  | 296 |
| 51 | 3'-5' | 26218802 | 26219120 | 26219435 | 33515344 | 315 | 6  | 305 |
| 52 | 3'-5' | 26497728 | 26498043 | 26498361 | 33794270 | 318 | 19 | 308 |
| 53 | 3'-5' | 26544050 | 26544308 | 26544683 | 33840592 | 375 | 22 | 365 |
| 54 | 3'-5' | 27675245 | 27675434 | 27675878 | 34971787 | 444 | 28 | 434 |
| 55 | 3'-5' | 27822583 | 27822829 | 27823216 | 35119125 | 387 | 13 | 377 |
| 56 | 3'-5' | 31271469 | 31271718 | 31272102 | 38568011 | 384 | 27 | 374 |
| 57 | 3'-5' | 31516860 | 31517152 | 31517493 | 38813402 | 341 | 20 | 331 |
| 58 | 3'-5' | 32310368 | 32310630 | 32311001 | 39606910 | 371 | 26 | 361 |
| 59 | 3'-5' | 35205991 | 35206232 | 35206624 | 42502533 | 392 | 29 | 382 |
| 60 | 3'-5' | 37366833 | 37367103 | 37367466 | 44663375 | 363 | 18 | 353 |
| 61 | 3'-5' | 38707506 | 38707725 | 38708139 | 46004048 | 414 | 13 | 404 |
| 62 | 3'-5' | 38881274 | 38881467 | 38881907 | 46177816 | 440 | 10 | 430 |
| 63 | 3'-5' | 40319549 | 40319814 | 40320182 | 47616091 | 368 | 11 | 358 |
| 64 | 3'-5' | 41057670 | 41058009 | 41058303 | 48354212 | 294 | 23 | 284 |
| 65 | 3'-5' | 41240708 | 41240880 | 41241341 | 48537250 | 461 | 32 | 451 |

|    |       |          |          |          |          |     |    |     |
|----|-------|----------|----------|----------|----------|-----|----|-----|
| 66 | 3'-5' | 42587423 | 42587656 | 42588056 | 49883965 | 400 | 12 | 390 |
| 67 | 3'-5' | 42620165 | 42620434 | 42620798 | 49916707 | 364 | 25 | 354 |
| 68 | 3'-5' | 43658564 | 43658744 | 43659197 | 50955106 | 453 | 28 | 443 |
| 69 | 3'-5' | 44144911 | 44145157 | 44145544 | 51441453 | 387 | 24 | 377 |
| 70 | 3'-5' | 45273579 | 45273756 | 45274212 | 52570121 | 456 | 15 | 446 |
| 71 | 3'-5' | 45745033 | 45745121 | 45745666 | 53041575 | 545 | 17 | 535 |
| 72 | 3'-5' | 46313290 | 46313501 | 46313923 | 53609832 | 422 | 15 | 412 |
| 73 | 3'-5' | 48948012 | 48948086 | 48948645 | 56244554 | 559 | 14 | 549 |
| 74 | 3'-5' | 48975013 | 48975218 | 48975646 | 56271555 | 428 | 19 | 418 |
| 75 | 3'-5' | 50266018 | 50266500 | 50266651 | 57562560 | 151 | 33 | 141 |

NT\_039500.7 (3)

|     |       |          |          |          |           |     |    |     |
|-----|-------|----------|----------|----------|-----------|-----|----|-----|
| 76  | 5'-3' | 326790   | 326790   | 327083   | 57995403  | 293 | 6  | 283 |
| 77  | 5'-3' | 2468546  | 2468546  | 2468906  | 60137159  | 360 | 27 | 350 |
| 78  | 5'-3' | 5099166  | 5099166  | 5099784  | 62767779  | 618 | 9  | 608 |
| 79  | 5'-3' | 7001699  | 7001699  | 7001875  | 64670312  | 176 | 10 | 166 |
| 80  | 5'-3' | 7612264  | 7612264  | 7612614  | 65280877  | 350 | 31 | 340 |
| 81  | 5'-3' | 8106871  | 8106871  | 8107211  | 65775484  | 340 | 24 | 330 |
| 82  | 5'-3' | 8617332  | 8617332  | 8617509  | 66285945  | 177 | 14 | 167 |
| 83  | 5'-3' | 10458301 | 10458301 | 10458716 | 68126914  | 415 | 30 | 405 |
| 84  | 5'-3' | 14684858 | 14684858 | 14685283 | 72353471  | 425 | 9  | 415 |
| 85  | 5'-3' | 19130788 | 19130788 | 19131000 | 76799401  | 212 | 17 | 202 |
| 86  | 5'-3' | 19889709 | 19889709 | 19890085 | 77558322  | 376 | 17 | 366 |
| 87  | 5'-3' | 21703259 | 21703259 | 21703748 | 79371872  | 489 | 26 | 479 |
| 88  | 5'-3' | 24947156 | 24947156 | 24947528 | 82615769  | 372 | 22 | 362 |
| 89  | 5'-3' | 27561475 | 27561475 | 27561711 | 85230088  | 236 | 28 | 226 |
| 90  | 5'-3' | 29178285 | 29178285 | 29178621 | 86846898  | 336 | 17 | 326 |
| 91  | 5'-3' | 30825859 | 30825859 | 30826223 | 88494472  | 364 | 27 | 354 |
| 92  | 5'-3' | 33193103 | 33193103 | 33193533 | 90861716  | 430 | 10 | 420 |
| 93  | 5'-3' | 39951403 | 39951403 | 39951742 | 97620016  | 339 | 18 | 329 |
| 94  | 5'-3' | 40139819 | 40139819 | 40140294 | 97808432  | 475 | 28 | 465 |
| 95  | 5'-3' | 42530113 | 42530113 | 42530370 | 100198726 | 257 | 14 | 247 |
| 96  | 5'-3' | 43480071 | 43480071 | 43480527 | 101148684 | 456 | 23 | 446 |
| 97  | 5'-3' | 45167722 | 45167722 | 45168109 | 102836335 | 387 | 26 | 377 |
| 98  | 5'-3' | 45777820 | 45777820 | 45778179 | 103446433 | 359 | 24 | 349 |
| 99  | 5'-3' | 46702536 | 46702536 | 46702956 | 104371149 | 420 | 7  | 410 |
| 100 | 5'-3' | 47296674 | 47296674 | 47296979 | 104965287 | 305 | 18 | 295 |

|     |       |          |          |          |           |     |    |     |
|-----|-------|----------|----------|----------|-----------|-----|----|-----|
| 101 | 5'-3' | 50708467 | 50708467 | 50708799 | 108377080 | 332 | 30 | 322 |
| 102 | 5'-3' | 53719999 | 53719999 | 53720324 | 111388612 | 325 | 27 | 315 |
| 103 | 5'-3' | 58793476 | 58793476 | 58793857 | 116462089 | 381 | 16 | 371 |
| 104 | 5'-3' | 62760067 | 62760067 | 62760218 | 120428680 | 151 | 24 | 141 |
| 105 | 5'-3' | 62891727 | 62891727 | 62892120 | 120560340 | 393 | 29 | 383 |
| 106 | 5'-3' | 64757670 | 64757670 | 64758119 | 122426283 | 449 | 7  | 439 |
| 107 | 5'-3' | 66100245 | 66100245 | 66100596 | 123768858 | 351 | 28 | 341 |
| 108 | 5'-3' | 66336020 | 66336020 | 66336340 | 124004633 | 320 | 24 | 310 |
| 109 | 5'-3' | 67208574 | 67208574 | 67208921 | 124877187 | 347 | 30 | 337 |
| 110 | 3'-5' | 4925899  | 4926141  | 4926532  | 62594512  | 391 | 16 | 381 |
| 111 | 3'-5' | 5232272  | 5232644  | 5232905  | 62900885  | 261 | 23 | 251 |
| 112 | 3'-5' | 5790027  | 5790310  | 5790660  | 63458640  | 350 | 18 | 340 |
| 113 | 3'-5' | 6270052  | 6270294  | 6270685  | 63938665  | 391 | 19 | 381 |
| 114 | 3'-5' | 6450257  | 6450729  | 6450890  | 64118870  | 161 | 7  | 151 |
| 115 | 3'-5' | 8205977  | 8206389  | 8206610  | 65874590  | 221 | 16 | 211 |
| 116 | 3'-5' | 9604421  | 9604696  | 9605054  | 67273034  | 358 | 9  | 348 |
| 117 | 3'-5' | 13397209 | 13397460 | 13397842 | 71065822  | 382 | 19 | 372 |
| 118 | 3'-5' | 15361112 | 15361450 | 15361745 | 73029725  | 295 | 16 | 285 |
| 119 | 3'-5' | 20373829 | 20374198 | 20374462 | 78042442  | 264 | 20 | 254 |
| 120 | 3'-5' | 21099184 | 21099516 | 21099817 | 78767797  | 301 | 34 | 291 |
| 121 | 3'-5' | 24290391 | 24290573 | 24291024 | 81959004  | 451 | 22 | 441 |
| 122 | 3'-5' | 28705418 | 28705556 | 28706051 | 86374031  | 495 | 25 | 485 |
| 123 | 3'-5' | 30413566 | 30413760 | 30414199 | 88082179  | 439 | 9  | 429 |
| 124 | 3'-5' | 34499013 | 34499121 | 34499646 | 92167626  | 525 | 9  | 515 |
| 125 | 3'-5' | 34792914 | 34793202 | 34793547 | 92461527  | 345 | 34 | 335 |
| 126 | 3'-5' | 35266787 | 35267037 | 35267420 | 92935400  | 383 | 8  | 373 |
| 127 | 3'-5' | 38054679 | 38054887 | 38055312 | 95723292  | 425 | 21 | 415 |
| 128 | 3'-5' | 40555258 | 40555554 | 40555891 | 98223871  | 337 | 29 | 327 |
| 129 | 3'-5' | 41251930 | 41252118 | 41252563 | 98920543  | 445 | 9  | 435 |
| 130 | 3'-5' | 42228983 | 42229191 | 42229616 | 99897596  | 425 | 26 | 415 |
| 131 | 3'-5' | 43145638 | 43145889 | 43146271 | 100814251 | 382 | 20 | 372 |
| 132 | 3'-5' | 43272279 | 43272525 | 43272912 | 100940892 | 387 | 10 | 377 |
| 133 | 3'-5' | 44116550 | 44116731 | 44117183 | 101785163 | 452 | 30 | 442 |
| 134 | 3'-5' | 44920359 | 44920571 | 44920992 | 102588972 | 421 | 20 | 411 |
| 135 | 3'-5' | 45506486 | 45506737 | 45507119 | 103175099 | 382 | 12 | 372 |
| 136 | 3'-5' | 46460077 | 46460242 | 46460710 | 104128690 | 468 | 13 | 458 |
| 137 | 3'-5' | 48137567 | 48137820 | 48138200 | 105806180 | 380 | 13 | 370 |

|     |       |          |          |          |           |     |    |     |
|-----|-------|----------|----------|----------|-----------|-----|----|-----|
| 138 | 3'-5' | 48711214 | 48711473 | 48711847 | 106379827 | 374 | 25 | 364 |
| 139 | 3'-5' | 51072819 | 51073089 | 51073452 | 108741432 | 363 | 20 | 353 |
| 140 | 3'-5' | 52089273 | 52089629 | 52089906 | 109757886 | 277 | 9  | 267 |
| 141 | 3'-5' | 52587505 | 52587749 | 52588138 | 110256118 | 389 | 30 | 379 |
| 142 | 3'-5' | 53561132 | 53561425 | 53561765 | 111229745 | 340 | 17 | 330 |
| 143 | 3'-5' | 55030844 | 55031100 | 55031477 | 112699457 | 377 | 31 | 367 |
| 144 | 3'-5' | 55039705 | 55039930 | 55040338 | 112708318 | 408 | 21 | 398 |
| 145 | 3'-5' | 59321971 | 59322297 | 59322604 | 116990584 | 307 | 12 | 297 |
| 146 | 3'-5' | 62418683 | 62418936 | 62419316 | 120087296 | 380 | 9  | 370 |
| 147 | 3'-5' | 65805704 | 65805952 | 65806337 | 123474317 | 385 | 17 | 375 |
| 148 | 3'-5' | 65977698 | 65977934 | 65978331 | 123646311 | 397 | 6  | 387 |
| 149 | 3'-5' | 70592037 | 70592308 | 70592670 | 128260650 | 362 | 9  | 352 |
| 150 | 3'-5' | 71714268 | 71714534 | 71714901 | 129382881 | 367 | 27 | 357 |
| 151 | 3'-5' | 71715162 | 71715364 | 71715795 | 129383775 | 431 | 32 | 421 |

11

|    |       |                 |          |          |          |     |    |     |
|----|-------|-----------------|----------|----------|----------|-----|----|-----|
|    |       | NT_039515.6 (1) |          |          |          |     |    |     |
| 0  | 5'-3' | 95810           | 95810    | 96392    | 3095810  | 582 | 14 | 572 |
| 1  | 5'-3' | 2200663         | 2200663  | 2200947  | 5200663  | 284 | 17 | 274 |
| 2  | 5'-3' | 3683866         | 3683866  | 3684245  | 6683866  | 379 | 30 | 369 |
| 3  | 5'-3' | 5522377         | 5522377  | 5522527  | 8522377  | 150 | 28 | 140 |
| 4  | 5'-3' | 11627435        | 11627435 | 11627857 | 14627435 | 422 | 18 | 412 |
| 5  | 5'-3' | 13214471        | 13214471 | 13214885 | 16214471 | 414 | 29 | 404 |
| 6  | 5'-3' | 15222815        | 15222815 | 15223190 | 18222815 | 375 | 14 | 365 |
| 7  | 5'-3' | 19159921        | 19159921 | 19160187 | 22159921 | 266 | 9  | 256 |
| 8  | 5'-3' | 21244257        | 21244257 | 21244597 | 24244257 | 340 | 7  | 330 |
| 9  | 5'-3' | 28470633        | 28470633 | 28471013 | 31470633 | 380 | 14 | 370 |
| 10 | 5'-3' | 28876641        | 28876641 | 28876976 | 31876641 | 335 | 15 | 325 |
| 11 | 5'-3' | 29306480        | 29306480 | 29307087 | 32306480 | 607 | 8  | 597 |
| 12 | 3'-5' | 9638797         | 9639087  | 9639430  | 12638797 | 343 | 6  | 333 |
| 13 | 3'-5' | 10348174        | 10348431 | 10348807 | 13348174 | 376 | 11 | 366 |
| 14 | 3'-5' | 10752194        | 10752380 | 10752827 | 13752194 | 447 | 20 | 437 |
| 15 | 3'-5' | 11477881        | 11478058 | 11478514 | 14477881 | 456 | 8  | 446 |
| 16 | 3'-5' | 11503101        | 11503354 | 11503734 | 14503101 | 380 | 17 | 370 |
| 17 | 3'-5' | 12270494        | 12270666 | 12271127 | 15270494 | 461 | 19 | 451 |
| 18 | 3'-5' | 14227574        | 14227935 | 14228207 | 17227574 | 272 | 6  | 262 |
| 19 | 3'-5' | 14530511        | 14530775 | 14531144 | 17530511 | 369 | 23 | 359 |
| 20 | 3'-5' | 18839794        | 18840087 | 18840427 | 21839794 | 340 | 9  | 330 |

|    |       |          |          |          |          |     |    |     |
|----|-------|----------|----------|----------|----------|-----|----|-----|
| 21 | 3'-5' | 21885322 | 21885589 | 21885955 | 24885322 | 366 | 9  | 356 |
| 22 | 3'-5' | 22629627 | 22629806 | 22630260 | 25629627 | 454 | 12 | 444 |
| 23 | 3'-5' | 23213637 | 23213943 | 23214270 | 26213637 | 327 | 24 | 317 |
| 24 | 3'-5' | 25013560 | 25013874 | 25014193 | 28013560 | 319 | 18 | 309 |
| 25 | 3'-5' | 26614581 | 26615028 | 26615214 | 29614581 | 186 | 33 | 176 |
| 26 | 3'-5' | 27163988 | 27164220 | 27164621 | 30163988 | 401 | 27 | 391 |
| 27 | 3'-5' | 27307248 | 27307558 | 27307881 | 30307248 | 323 | 34 | 313 |
| 28 | 3'-5' | 28819312 | 28819616 | 28819945 | 31819312 | 329 | 8  | 319 |

NT\_096135.5 (2)

|    |       |          |          |          |          |     |    |     |
|----|-------|----------|----------|----------|----------|-----|----|-----|
| 29 | 5'-3' | 2201812  | 2201812  | 2202294  | 36696934 | 482 | 26 | 472 |
| 30 | 5'-3' | 4049377  | 4049377  | 4049734  | 38544499 | 357 | 15 | 347 |
| 31 | 5'-3' | 4839368  | 4839368  | 4839802  | 39334490 | 434 | 23 | 424 |
| 32 | 5'-3' | 7088861  | 7088861  | 7089332  | 41583983 | 471 | 19 | 461 |
| 33 | 5'-3' | 8181709  | 8181709  | 8182101  | 42676831 | 392 | 20 | 382 |
| 34 | 5'-3' | 11193078 | 11193078 | 11193565 | 45688200 | 487 | 7  | 477 |
| 35 | 5'-3' | 13358238 | 13358238 | 13358686 | 47853360 | 448 | 24 | 438 |
| 36 | 5'-3' | 13695279 | 13695279 | 13695698 | 48190401 | 419 | 9  | 409 |
| 37 | 5'-3' | 14066627 | 14066627 | 14067046 | 48561749 | 419 | 30 | 409 |
| 38 | 5'-3' | 14943976 | 14943976 | 14944457 | 49439098 | 481 | 14 | 471 |
| 39 | 5'-3' | 20343346 | 20343346 | 20343673 | 54838468 | 327 | 15 | 317 |
| 40 | 5'-3' | 23373693 | 23373693 | 23374053 | 57868815 | 360 | 8  | 350 |
| 41 | 5'-3' | 28812452 | 28812452 | 28812632 | 63307574 | 180 | 15 | 170 |
| 42 | 5'-3' | 32165994 | 32165994 | 32166404 | 66661116 | 410 | 10 | 400 |
| 43 | 5'-3' | 34372108 | 34372108 | 34372634 | 68867230 | 526 | 17 | 516 |
| 44 | 5'-3' | 36218131 | 36218131 | 36218586 | 70713253 | 455 | 12 | 445 |
| 45 | 5'-3' | 39203329 | 39203329 | 39203682 | 73698451 | 353 | 14 | 343 |
| 46 | 5'-3' | 39205535 | 39205535 | 39205828 | 73700657 | 293 | 18 | 283 |
| 47 | 5'-3' | 41508139 | 41508139 | 41508623 | 76003261 | 484 | 17 | 474 |
| 48 | 5'-3' | 45907969 | 45907969 | 45908421 | 80403091 | 452 | 8  | 442 |
| 49 | 5'-3' | 46131613 | 46131613 | 46132060 | 80626735 | 447 | 29 | 437 |
| 50 | 5'-3' | 47405386 | 47405386 | 47405784 | 81900508 | 398 | 6  | 388 |
| 51 | 5'-3' | 50751925 | 50751925 | 50752397 | 85247047 | 472 | 7  | 462 |
| 52 | 5'-3' | 52401151 | 52401151 | 52401511 | 86896273 | 360 | 28 | 350 |
| 53 | 5'-3' | 53107377 | 53107377 | 53107846 | 87602499 | 469 | 16 | 459 |
| 54 | 3'-5' | 282966   | 283382   | 283599   | 34778088 | 217 | 20 | 207 |
| 55 | 3'-5' | 1099274  | 1099646  | 1099907  | 35594396 | 261 | 20 | 251 |



|    |       |          |          |          |          |     |    |     |
|----|-------|----------|----------|----------|----------|-----|----|-----|
| 56 | 3'-5' | 3408047  | 3408317  | 3408680  | 37903169 | 363 | 30 | 353 |
| 57 | 3'-5' | 3493057  | 3493374  | 3493690  | 37988179 | 316 | 30 | 306 |
| 58 | 3'-5' | 3505439  | 3505641  | 3506072  | 38000561 | 431 | 9  | 421 |
| 59 | 3'-5' | 4051560  | 4051846  | 4052193  | 38546682 | 347 | 8  | 337 |
| 60 | 3'-5' | 4870830  | 4871011  | 4871463  | 39365952 | 452 | 29 | 442 |
| 61 | 3'-5' | 8096498  | 8096730  | 8097131  | 42591620 | 401 | 33 | 391 |
| 62 | 3'-5' | 8351892  | 8352023  | 8352525  | 42847014 | 502 | 11 | 492 |
| 63 | 3'-5' | 13812724 | 13812931 | 13813357 | 48307846 | 426 | 14 | 416 |
| 64 | 3'-5' | 14596112 | 14596194 | 14596745 | 49091234 | 551 | 20 | 541 |
| 65 | 3'-5' | 17552822 | 17552867 | 17553455 | 52047944 | 588 | 32 | 578 |
| 66 | 3'-5' | 17728642 | 17729056 | 17729275 | 52223764 | 219 | 31 | 209 |
| 67 | 3'-5' | 19765007 | 19765199 | 19765640 | 54260129 | 441 | 23 | 431 |
| 68 | 3'-5' | 21826927 | 21827018 | 21827560 | 56322049 | 542 | 28 | 532 |
| 69 | 3'-5' | 23719217 | 23719476 | 23719850 | 58214339 | 374 | 6  | 364 |
| 70 | 3'-5' | 30528793 | 30529052 | 30529426 | 65023915 | 374 | 7  | 364 |
| 71 | 3'-5' | 34522267 | 34522555 | 34522900 | 69017389 | 345 | 9  | 335 |
| 72 | 3'-5' | 36750900 | 36751156 | 36751533 | 71246022 | 377 | 6  | 367 |
| 73 | 3'-5' | 44496605 | 44496925 | 44497238 | 78991727 | 313 | 27 | 303 |

NT\_165773.2 (3)

|    |       |          |          |          |           |     |    |     |
|----|-------|----------|----------|----------|-----------|-----|----|-----|
| 74 | 5'-3' | 2790383  | 2790383  | 2790789  | 91249308  | 406 | 15 | 396 |
| 75 | 5'-3' | 3479811  | 3479811  | 3480242  | 91938736  | 431 | 21 | 421 |
| 76 | 5'-3' | 4143840  | 4143840  | 4144258  | 92602765  | 418 | 15 | 408 |
| 77 | 5'-3' | 12909805 | 12909805 | 12910144 | 101368730 | 339 | 7  | 329 |
| 78 | 5'-3' | 13263310 | 13263310 | 13263536 | 101722235 | 226 | 22 | 216 |
| 79 | 5'-3' | 18237142 | 18237142 | 18237491 | 106696067 | 349 | 11 | 339 |
| 80 | 5'-3' | 20747663 | 20747663 | 20747955 | 109206588 | 292 | 16 | 282 |
| 81 | 5'-3' | 22547051 | 22547051 | 22547457 | 111005976 | 406 | 8  | 396 |
| 82 | 5'-3' | 26922833 | 26922833 | 26923134 | 115381758 | 301 | 16 | 291 |
| 83 | 5'-3' | 29031751 | 29031751 | 29031997 | 117490676 | 246 | 19 | 236 |
| 84 | 3'-5' | 3242148  | 3242604  | 3242781  | 91701073  | 177 | 7  | 167 |
| 85 | 3'-5' | 5128107  | 5128352  | 5128740  | 93587032  | 388 | 9  | 378 |
| 86 | 3'-5' | 6457945  | 6458174  | 6458578  | 94916870  | 404 | 8  | 394 |
| 87 | 3'-5' | 9288059  | 9288420  | 9288692  | 97746984  | 272 | 21 | 262 |
| 88 | 3'-5' | 10564786 | 10564947 | 10565419 | 99023711  | 472 | 24 | 462 |
| 89 | 3'-5' | 12148410 | 12148749 | 12149043 | 100607335 | 294 | 26 | 284 |
| 90 | 3'-5' | 12253734 | 12253918 | 12254367 | 100712659 | 449 | 9  | 439 |

|    |       |          |          |          |           |     |    |     |
|----|-------|----------|----------|----------|-----------|-----|----|-----|
| 91 | 3'-5' | 15972762 | 15972929 | 15973395 | 104431687 | 466 | 22 | 456 |
| 92 | 3'-5' | 16204968 | 16205287 | 16205601 | 104663893 | 314 | 13 | 304 |
| 93 | 3'-5' | 22610826 | 22610968 | 22611459 | 111069751 | 491 | 31 | 481 |
| 94 | 3'-5' | 23024119 | 23024345 | 23024752 | 111483044 | 407 | 20 | 397 |
| 95 | 3'-5' | 23751672 | 23751785 | 23752305 | 112210597 | 520 | 33 | 510 |
| 96 | 3'-5' | 24848958 | 24849152 | 24849591 | 113307883 | 439 | 27 | 429 |
| 97 | 3'-5' | 31913336 | 31913608 | 31913969 | 120372261 | 361 | 7  | 351 |

12

|    |       |                 |          |          |          |     |    |     |
|----|-------|-----------------|----------|----------|----------|-----|----|-----|
|    |       | NT_039548.7 (1) |          |          |          |     |    |     |
| 0  | 5'-3' | 520783          | 520783   | 521393   | 3520783  | 610 | 9  | 600 |
| 1  | 5'-3' | 3151738         | 3151738  | 3152070  | 6151738  | 332 | 8  | 322 |
| 2  | 5'-3' | 4481405         | 4481405  | 4481758  | 7481405  | 353 | 25 | 343 |
| 3  | 5'-3' | 5213886         | 5213886  | 5214285  | 8213886  | 399 | 23 | 389 |
| 4  | 5'-3' | 6879772         | 6879772  | 6880157  | 9879772  | 385 | 23 | 375 |
| 5  | 5'-3' | 12114096        | 12114096 | 12114406 | 15114096 | 310 | 22 | 300 |
| 6  | 5'-3' | 14960348        | 14960348 | 14960709 | 17960348 | 361 | 11 | 351 |
| 7  | 5'-3' | 15493886        | 15493886 | 15494241 | 18493886 | 355 | 11 | 345 |
| 8  | 5'-3' | 15598510        | 15598510 | 15598870 | 18598510 | 360 | 11 | 350 |
| 9  | 5'-3' | 15716872        | 15716872 | 15717231 | 18716872 | 359 | 11 | 349 |
| 10 | 5'-3' | 15832684        | 15832684 | 15833044 | 18832684 | 360 | 11 | 350 |
| 11 | 5'-3' | 15958036        | 15958036 | 15958397 | 18958036 | 361 | 11 | 351 |
| 12 | 5'-3' | 17399422        | 17399422 | 17399777 | 20399422 | 355 | 11 | 345 |
| 13 | 5'-3' | 17592451        | 17592451 | 17592839 | 20592451 | 388 | 11 | 378 |
| 14 | 5'-3' | 17969580        | 17969580 | 17969940 | 20969580 | 360 | 11 | 350 |
| 15 | 5'-3' | 18093411        | 18093411 | 18093772 | 21093411 | 361 | 11 | 351 |
| 16 | 5'-3' | 19664393        | 19664393 | 19664754 | 22664393 | 361 | 11 | 351 |
| 17 | 5'-3' | 19781596        | 19781596 | 19781957 | 22781596 | 361 | 11 | 351 |
| 18 | 5'-3' | 19952348        | 19952348 | 19952710 | 22952348 | 362 | 11 | 352 |
| 19 | 5'-3' | 20074427        | 20074427 | 20074788 | 23074427 | 361 | 11 | 351 |
| 20 | 5'-3' | 20498640        | 20498640 | 20499001 | 23498640 | 361 | 11 | 351 |
| 21 | 5'-3' | 20635128        | 20635128 | 20635489 | 23635128 | 361 | 11 | 351 |
| 22 | 5'-3' | 21581052        | 21581052 | 21581420 | 24581052 | 368 | 9  | 358 |
| 23 | 5'-3' | 22619556        | 22619556 | 22619968 | 25619556 | 412 | 9  | 402 |
| 24 | 5'-3' | 26042398        | 26042398 | 26042768 | 29042398 | 370 | 19 | 360 |
| 25 | 5'-3' | 28163959        | 28163959 | 28164321 | 31163959 | 362 | 17 | 352 |
| 26 | 5'-3' | 31612510        | 31612510 | 31612931 | 34612510 | 421 | 13 | 411 |
| 27 | 5'-3' | 36496206        | 36496206 | 36496535 | 39496206 | 329 | 15 | 319 |

|    |       |          |          |          |          |     |    |     |
|----|-------|----------|----------|----------|----------|-----|----|-----|
| 28 | 5'-3' | 37452360 | 37452360 | 37452702 | 40452360 | 342 | 6  | 332 |
| 29 | 5'-3' | 38382406 | 38382406 | 38382760 | 41382406 | 354 | 31 | 344 |
| 30 | 3'-5' | 3332283  | 3332588  | 3332916  | 6332283  | 328 | 26 | 318 |
| 31 | 3'-5' | 5111652  | 5111683  | 5112285  | 8111652  | 602 | 16 | 592 |
| 32 | 3'-5' | 16776130 | 16776401 | 16776763 | 19776130 | 362 | 11 | 352 |
| 33 | 3'-5' | 16918589 | 16918862 | 16919222 | 19918589 | 360 | 11 | 350 |
| 34 | 3'-5' | 18865639 | 18865917 | 18866272 | 21865639 | 355 | 11 | 345 |
| 35 | 3'-5' | 19115715 | 19115987 | 19116348 | 22115715 | 361 | 11 | 351 |
| 36 | 3'-5' | 19233150 | 19233422 | 19233783 | 22233150 | 361 | 11 | 351 |
| 37 | 3'-5' | 19531493 | 19531765 | 19532126 | 22531493 | 361 | 11 | 351 |
| 38 | 3'-5' | 20448341 | 20448606 | 20448974 | 23448341 | 368 | 9  | 358 |
| 39 | 3'-5' | 20877728 | 20878000 | 20878361 | 23877728 | 361 | 11 | 351 |
| 40 | 3'-5' | 21354205 | 21354477 | 21354838 | 24354205 | 361 | 11 | 351 |
| 41 | 3'-5' | 21514097 | 21514369 | 21514730 | 24514097 | 361 | 11 | 351 |
| 42 | 3'-5' | 21807689 | 21807962 | 21808322 | 24807689 | 360 | 11 | 350 |
| 43 | 3'-5' | 21959748 | 21960020 | 21960381 | 24959748 | 361 | 11 | 351 |
| 44 | 3'-5' | 23840689 | 23841092 | 23841322 | 26840689 | 230 | 24 | 220 |
| 45 | 3'-5' | 25777810 | 25778185 | 25778443 | 28777810 | 258 | 13 | 248 |
| 46 | 3'-5' | 27932302 | 27932435 | 27932935 | 30932302 | 500 | 21 | 490 |
| 47 | 3'-5' | 27939782 | 27939995 | 27940415 | 30939782 | 420 | 24 | 410 |
| 48 | 3'-5' | 28015555 | 28015731 | 28016188 | 31015555 | 457 | 27 | 447 |
| 49 | 3'-5' | 28478400 | 28478653 | 28479033 | 31478400 | 380 | 12 | 370 |

NT\_039551.7 (2)

|    |       |          |          |          |          |     |    |     |
|----|-------|----------|----------|----------|----------|-----|----|-----|
| 50 | 5'-3' | 464656   | 464656   | 464997   | 42796542 | 341 | 19 | 331 |
| 51 | 5'-3' | 1375861  | 1375861  | 1376200  | 43707747 | 339 | 27 | 329 |
| 52 | 5'-3' | 3775248  | 3775248  | 3775625  | 46107134 | 377 | 17 | 367 |
| 53 | 5'-3' | 6611074  | 6611074  | 6611430  | 48942960 | 356 | 27 | 346 |
| 54 | 5'-3' | 8167512  | 8167512  | 8167919  | 50499398 | 407 | 31 | 397 |
| 55 | 5'-3' | 8530948  | 8530948  | 8531274  | 50862834 | 326 | 12 | 316 |
| 56 | 5'-3' | 9592456  | 9592456  | 9592852  | 51924342 | 396 | 17 | 386 |
| 57 | 5'-3' | 10046404 | 10046404 | 10046804 | 52378290 | 400 | 12 | 390 |
| 58 | 5'-3' | 11029923 | 11029923 | 11030356 | 53361809 | 433 | 26 | 423 |
| 59 | 5'-3' | 11281674 | 11281674 | 11282024 | 53613560 | 350 | 15 | 340 |
| 60 | 5'-3' | 14900232 | 14900232 | 14900609 | 57232118 | 377 | 9  | 367 |
| 61 | 5'-3' | 15302831 | 15302831 | 15303256 | 57634717 | 425 | 28 | 415 |
| 62 | 5'-3' | 15729306 | 15729306 | 15729701 | 58061192 | 395 | 12 | 385 |

|    |       |          |          |          |          |     |    |     |
|----|-------|----------|----------|----------|----------|-----|----|-----|
| 63 | 5'-3' | 16805441 | 16805441 | 16805844 | 59137327 | 403 | 17 | 393 |
| 64 | 5'-3' | 17385649 | 17385649 | 17386061 | 59717535 | 412 | 13 | 402 |
| 65 | 5'-3' | 22775782 | 22775782 | 22776071 | 65107668 | 289 | 6  | 279 |
| 66 | 5'-3' | 24133003 | 24133003 | 24133379 | 66464889 | 376 | 19 | 366 |
| 67 | 5'-3' | 25065613 | 25065613 | 25066049 | 67397499 | 436 | 13 | 426 |
| 68 | 5'-3' | 27994323 | 27994323 | 27994901 | 70326209 | 578 | 9  | 568 |
| 69 | 5'-3' | 28450787 | 28450787 | 28451137 | 70782673 | 350 | 26 | 340 |
| 70 | 5'-3' | 29750851 | 29750851 | 29751198 | 72082737 | 347 | 6  | 337 |
| 71 | 5'-3' | 33628176 | 33628176 | 33628572 | 75960062 | 396 | 11 | 386 |
| 72 | 5'-3' | 33749301 | 33749301 | 33749668 | 76081187 | 367 | 27 | 357 |
| 73 | 5'-3' | 33755497 | 33755497 | 33755933 | 76087383 | 436 | 9  | 426 |
| 74 | 5'-3' | 35909098 | 35909098 | 35909497 | 78240984 | 399 | 20 | 389 |
| 75 | 3'-5' | 456564   | 456945   | 457197   | 42788450 | 252 | 32 | 242 |
| 76 | 3'-5' | 500825   | 501092   | 501458   | 42832711 | 366 | 9  | 356 |
| 77 | 3'-5' | 2704788  | 2705040  | 2705421  | 45036674 | 381 | 8  | 371 |
| 78 | 3'-5' | 6972486  | 6972852  | 6973119  | 49304372 | 267 | 29 | 257 |
| 79 | 3'-5' | 12570352 | 12570720 | 12570985 | 54902238 | 265 | 29 | 255 |
| 80 | 3'-5' | 19215914 | 19216170 | 19216547 | 61547800 | 377 | 13 | 367 |
| 81 | 3'-5' | 21318730 | 21319006 | 21319363 | 63650616 | 357 | 25 | 347 |
| 82 | 3'-5' | 21366066 | 21366336 | 21366699 | 63697952 | 363 | 25 | 353 |
| 83 | 3'-5' | 24574037 | 24574270 | 24574670 | 66905923 | 400 | 26 | 390 |
| 84 | 3'-5' | 24816019 | 24816344 | 24816652 | 67147905 | 308 | 31 | 298 |
| 85 | 3'-5' | 25052539 | 25052849 | 25053172 | 67384425 | 323 | 8  | 313 |
| 86 | 3'-5' | 25130887 | 25131128 | 25131520 | 67462773 | 392 | 34 | 382 |
| 87 | 3'-5' | 26184434 | 26184642 | 26185067 | 68516320 | 425 | 19 | 415 |
| 88 | 3'-5' | 26976650 | 26977005 | 26977283 | 69308536 | 278 | 8  | 268 |
| 89 | 3'-5' | 28764920 | 28765275 | 28765553 | 71096806 | 278 | 17 | 268 |
| 90 | 3'-5' | 30469783 | 30470216 | 30470416 | 72801669 | 200 | 14 | 190 |
| 91 | 3'-5' | 30944537 | 30944832 | 30945170 | 73276423 | 338 | 30 | 328 |
| 92 | 3'-5' | 32250033 | 32250279 | 32250666 | 74581919 | 387 | 10 | 377 |
| 93 | 3'-5' | 33039660 | 33039932 | 33040293 | 75371546 | 361 | 28 | 351 |
| 94 | 3'-5' | 34577641 | 34577817 | 34578274 | 76909527 | 457 | 22 | 447 |
| 95 | 3'-5' | 35724436 | 35724772 | 35725069 | 78056322 | 297 | 17 | 287 |
| 96 | 3'-5' | 36470826 | 36471094 | 36471459 | 78802712 | 365 | 24 | 355 |
| 97 | 3'-5' | 42621853 | 42622146 | 42622486 | 84953739 | 340 | 20 | 330 |

|     |       |          |          |          |           |     |    |     |
|-----|-------|----------|----------|----------|-----------|-----|----|-----|
| 98  | 5'-3' | 766784   | 766784   | 767153   | 89470777  | 369 | 11 | 359 |
| 99  | 5'-3' | 3291977  | 3291977  | 3292534  | 91995970  | 557 | 19 | 547 |
| 100 | 5'-3' | 5532894  | 5532894  | 5533369  | 94236887  | 475 | 30 | 465 |
| 101 | 5'-3' | 5936094  | 5936094  | 5936470  | 94640087  | 376 | 29 | 366 |
| 102 | 5'-3' | 8743614  | 8743614  | 8744029  | 97447607  | 415 | 6  | 405 |
| 103 | 5'-3' | 9059529  | 9059529  | 9059930  | 97763522  | 401 | 15 | 391 |
| 104 | 5'-3' | 11624278 | 11624278 | 11624531 | 100328271 | 253 | 29 | 243 |
| 105 | 5'-3' | 12814785 | 12814785 | 12815133 | 101518778 | 348 | 11 | 338 |
| 106 | 5'-3' | 13495679 | 13495679 | 13496069 | 102199672 | 390 | 31 | 380 |
| 107 | 5'-3' | 13741547 | 13741547 | 13741939 | 102445540 | 392 | 11 | 382 |
| 108 | 5'-3' | 23192458 | 23192458 | 23192725 | 111896451 | 267 | 14 | 257 |
| 109 | 5'-3' | 28223059 | 28223059 | 28223535 | 116927052 | 476 | 18 | 466 |
| 110 | 5'-3' | 28503783 | 28503783 | 28504152 | 117207776 | 369 | 24 | 359 |
| 111 | 5'-3' | 31243479 | 31243479 | 31243815 | 119947472 | 336 | 26 | 326 |
| 112 | 3'-5' | 2066348  | 2066637  | 2066981  | 90770341  | 344 | 14 | 334 |
| 113 | 3'-5' | 2602372  | 2602651  | 2603005  | 91306365  | 354 | 7  | 344 |
| 114 | 3'-5' | 3134670  | 3134927  | 3135303  | 91838663  | 376 | 26 | 366 |
| 115 | 3'-5' | 5014757  | 5015260  | 5015390  | 93718750  | 130 | 6  | 120 |
| 116 | 3'-5' | 6767857  | 6767990  | 6768490  | 95471850  | 500 | 9  | 490 |
| 117 | 3'-5' | 7028137  | 7028318  | 7028770  | 95732130  | 452 | 8  | 442 |
| 118 | 3'-5' | 7596877  | 7597132  | 7597510  | 96300870  | 378 | 28 | 368 |
| 119 | 3'-5' | 8221636  | 8221861  | 8222269  | 96925629  | 408 | 31 | 398 |
| 120 | 3'-5' | 19244039 | 19244352 | 19244672 | 107948032 | 320 | 19 | 310 |
| 121 | 3'-5' | 20773285 | 20773387 | 20773918 | 109477278 | 531 | 33 | 521 |
| 122 | 3'-5' | 20948265 | 20948491 | 20948898 | 109652258 | 407 | 14 | 397 |
| 123 | 3'-5' | 26763255 | 26763635 | 26763888 | 115467248 | 253 | 33 | 243 |

13

|   |       |                 |         |         |          |     |    |     |
|---|-------|-----------------|---------|---------|----------|-----|----|-----|
|   |       | NT_039573.7 (1) |         |         |          |     |    |     |
| 0 | 5'-3' | 7022324         | 7022324 | 7022816 | 10022324 | 492 | 16 | 482 |
| 1 | 5'-3' | 7212977         | 7212977 | 7213380 | 10212977 | 403 | 28 | 393 |
| 2 | 3'-5' | 171025          | 171282  | 171658  | 3171025  | 376 | 14 | 366 |
| 3 | 3'-5' | 1999238         | 1999456 | 1999871 | 4999238  | 415 | 9  | 405 |
| 4 | 3'-5' | 2824538         | 2824805 | 2825171 | 5824538  | 366 | 9  | 356 |
| 5 | 3'-5' | 5631908         | 5632167 | 5632541 | 8631908  | 374 | 22 | 364 |
| 6 | 3'-5' | 6933685         | 6933888 | 6934318 | 9933685  | 430 | 11 | 420 |

NT\_039578.7 (2)

|                 |       |          |          |          |          |     |    |     |
|-----------------|-------|----------|----------|----------|----------|-----|----|-----|
| 7               | 5'-3' | 25743    | 25743    | 26109    | 11199084 | 366 | 12 | 356 |
| 8               | 5'-3' | 4280831  | 4280831  | 4281218  | 15454172 | 387 | 25 | 377 |
| 9               | 5'-3' | 5667425  | 5667425  | 5667800  | 16840766 | 375 | 21 | 365 |
| 10              | 5'-3' | 6630962  | 6630962  | 6631340  | 17804303 | 378 | 14 | 368 |
| 11              | 5'-3' | 19412776 | 19412776 | 19413149 | 30586117 | 373 | 15 | 363 |
| 12              | 5'-3' | 21775876 | 21775876 | 21776256 | 32949217 | 380 | 24 | 370 |
| 13              | 5'-3' | 25139750 | 25139750 | 25140191 | 36313091 | 441 | 12 | 431 |
| 14              | 5'-3' | 25736093 | 25736093 | 25736375 | 36909434 | 282 | 26 | 272 |
| 15              | 3'-5' | 23419    | 23771    | 24052    | 11196760 | 281 | 32 | 271 |
| 16              | 3'-5' | 2730184  | 2730429  | 2730817  | 13903525 | 388 | 33 | 378 |
| 17              | 3'-5' | 5427721  | 5427981  | 5428354  | 16601062 | 373 | 33 | 363 |
| 18              | 3'-5' | 6641225  | 6641515  | 6641858  | 17814566 | 343 | 6  | 333 |
| 19              | 3'-5' | 7638506  | 7638770  | 7639139  | 18811847 | 369 | 12 | 359 |
| 20              | 3'-5' | 11457981 | 11458238 | 11458614 | 22631322 | 376 | 6  | 366 |
| 21              | 3'-5' | 12035292 | 12035599 | 12035925 | 23208633 | 326 | 24 | 316 |
| 22              | 3'-5' | 12105057 | 12105366 | 12105690 | 23278398 | 324 | 24 | 314 |
| 23              | 3'-5' | 16897270 | 16897500 | 16897903 | 28070611 | 403 | 19 | 393 |
| 24              | 3'-5' | 17377005 | 17377366 | 17377638 | 28550346 | 272 | 9  | 262 |
| 25              | 3'-5' | 23073094 | 23073261 | 23073727 | 34246435 | 466 | 32 | 456 |
| 26              | 3'-5' | 23106031 | 23106405 | 23106664 | 34279372 | 259 | 6  | 249 |
| 27              | 3'-5' | 24057578 | 24057777 | 24058211 | 35230919 | 434 | 31 | 424 |
| 28              | 3'-5' | 25681355 | 25681526 | 25681988 | 36854696 | 462 | 15 | 452 |
| 29              | 3'-5' | 27580091 | 27580156 | 27580724 | 38753432 | 568 | 12 | 558 |
| NT_039580.7 (3) |       |          |          |          |          |     |    |     |
| 30              | 5'-3' | 755602   | 755602   | 755984   | 40598538 | 382 | 16 | 372 |
| 31              | 5'-3' | 979398   | 979398   | 979809   | 40822334 | 411 | 19 | 401 |
| 32              | 5'-3' | 1344404  | 1344404  | 1344653  | 41187340 | 249 | 21 | 239 |
| 33              | 5'-3' | 4777529  | 4777529  | 4778009  | 44620465 | 480 | 20 | 470 |
| 34              | 5'-3' | 6651407  | 6651407  | 6651771  | 46494343 | 364 | 12 | 354 |
| 35              | 5'-3' | 9029273  | 9029273  | 9029600  | 48872209 | 327 | 12 | 317 |
| 36              | 5'-3' | 13089269 | 13089269 | 13089629 | 52932205 | 360 | 18 | 350 |
| 37              | 3'-5' | 1498543  | 1498891  | 1499176  | 41341479 | 285 | 7  | 275 |
| 38              | 3'-5' | 1875065  | 1875286  | 1875698  | 41718001 | 412 | 7  | 402 |
| 39              | 3'-5' | 2420994  | 2421076  | 2421627  | 42263930 | 551 | 12 | 541 |
| 40              | 3'-5' | 2579042  | 2579396  | 2579675  | 42421978 | 279 | 28 | 269 |
| 41              | 3'-5' | 5212169  | 5212497  | 5212802  | 45055105 | 305 | 31 | 295 |

|    |       |          |          |          |          |     |    |     |
|----|-------|----------|----------|----------|----------|-----|----|-----|
| 42 | 3'-5' | 6241266  | 6241350  | 6241899  | 46084202 | 549 | 20 | 539 |
| 43 | 3'-5' | 7114493  | 7114616  | 7115126  | 46957429 | 510 | 23 | 500 |
| 44 | 3'-5' | 11866557 | 11866730 | 11867190 | 51709493 | 460 | 23 | 450 |

NT\_039589.7 (4)

|    |       |          |          |          |          |     |    |     |
|----|-------|----------|----------|----------|----------|-----|----|-----|
| 45 | 5'-3' | 571470   | 571470   | 571992   | 55030351 | 522 | 19 | 512 |
| 46 | 5'-3' | 3879784  | 3879784  | 3880155  | 58338665 | 371 | 12 | 361 |
| 47 | 5'-3' | 8971034  | 8971034  | 8971273  | 63429915 | 239 | 21 | 229 |
| 48 | 5'-3' | 12331677 | 12331677 | 12332147 | 66790558 | 470 | 28 | 460 |
| 49 | 5'-3' | 12458612 | 12458612 | 12459082 | 66917493 | 470 | 28 | 460 |
| 50 | 5'-3' | 13523023 | 13523023 | 13523455 | 67981904 | 432 | 25 | 422 |
| 51 | 5'-3' | 14307494 | 14307494 | 14307800 | 68766375 | 306 | 26 | 296 |
| 52 | 5'-3' | 17816467 | 17816467 | 17816986 | 72275348 | 519 | 25 | 509 |
| 53 | 5'-3' | 20732715 | 20732715 | 20733082 | 75191596 | 367 | 27 | 357 |
| 54 | 5'-3' | 21475476 | 21475476 | 21475984 | 75934357 | 508 | 19 | 498 |
| 55 | 5'-3' | 28118609 | 28118609 | 28118969 | 82577490 | 360 | 17 | 350 |
| 56 | 5'-3' | 31104395 | 31104395 | 31104777 | 85563276 | 382 | 6  | 372 |
| 57 | 5'-3' | 33170362 | 33170362 | 33170760 | 87629243 | 398 | 10 | 388 |
| 58 | 5'-3' | 35682871 | 35682871 | 35683363 | 90141752 | 492 | 26 | 482 |
| 59 | 3'-5' | 6398606  | 6398838  | 6399239  | 60857487 | 401 | 14 | 391 |
| 60 | 3'-5' | 6543150  | 6543436  | 6543783  | 61002031 | 347 | 20 | 337 |
| 61 | 3'-5' | 10053112 | 10053321 | 10053745 | 64511993 | 424 | 22 | 414 |
| 62 | 3'-5' | 12682681 | 12682891 | 12683314 | 67141562 | 423 | 33 | 413 |
| 63 | 3'-5' | 21439186 | 21439386 | 21439819 | 75898067 | 433 | 18 | 423 |
| 64 | 3'-5' | 21823216 | 21823445 | 21823849 | 76282097 | 404 | 28 | 394 |
| 65 | 3'-5' | 23143886 | 23144182 | 23144519 | 77602767 | 337 | 7  | 327 |
| 66 | 3'-5' | 25865617 | 25865694 | 25866250 | 80324498 | 556 | 20 | 546 |
| 67 | 3'-5' | 30056939 | 30056959 | 30057572 | 84515820 | 613 | 16 | 603 |
| 68 | 3'-5' | 31155859 | 31156229 | 31156492 | 85614740 | 263 | 20 | 253 |
| 69 | 3'-5' | 34735570 | 34735915 | 34736203 | 89194451 | 288 | 25 | 278 |
| 70 | 3'-5' | 36456779 | 36457009 | 36457412 | 90915660 | 403 | 6  | 393 |
| 71 | 3'-5' | 37584042 | 37584132 | 37584675 | 92042923 | 543 | 12 | 533 |

NT\_039590.7 (5)

|    |       |         |         |         |           |     |    |     |
|----|-------|---------|---------|---------|-----------|-----|----|-----|
| 72 | 5'-3' | 1067719 | 1067719 | 1067856 | 93859070  | 137 | 6  | 127 |
| 73 | 5'-3' | 8008041 | 8008041 | 8008254 | 100799392 | 213 | 29 | 203 |
| 74 | 5'-3' | 9337937 | 9337937 | 9338328 | 102129288 | 391 | 28 | 381 |

|    |       |          |          |          |           |     |    |     |
|----|-------|----------|----------|----------|-----------|-----|----|-----|
| 75 | 5'-3' | 12350298 | 12350298 | 12350652 | 105141649 | 354 | 26 | 344 |
| 76 | 5'-3' | 13358572 | 13358572 | 13358948 | 106149923 | 376 | 23 | 366 |
| 77 | 3'-5' | 429688   | 429969   | 430321   | 93221039  | 352 | 8  | 342 |
| 78 | 3'-5' | 1109089  | 1109345  | 1109722  | 93900440  | 377 | 6  | 367 |
| 79 | 3'-5' | 1557161  | 1557383  | 1557794  | 94348512  | 411 | 8  | 401 |

14

|   |       |                 |          |          |          |     |    |     |
|---|-------|-----------------|----------|----------|----------|-----|----|-----|
|   |       | NT_039595.7 (1) |          |          |          |     |    |     |
| 0 | 5'-3' | 7203049         | 7203049  | 7203274  | 10203049 | 225 | 17 | 215 |
| 1 | 5'-3' | 7778523         | 7778523  | 7778927  | 10778523 | 404 | 18 | 394 |
| 2 | 5'-3' | 9101270         | 9101270  | 9101660  | 12101270 | 390 | 10 | 380 |
| 3 | 5'-3' | 11964275        | 11964275 | 11964662 | 14964275 | 387 | 30 | 377 |
| 4 | 3'-5' | 7739437         | 7739745  | 7740070  | 10739437 | 325 | 23 | 315 |
| 5 | 3'-5' | 8055378         | 8055634  | 8056011  | 11055378 | 377 | 29 | 367 |
| 6 | 3'-5' | 10622800        | 10622979 | 10623433 | 13622800 | 454 | 9  | 444 |
| 7 | 3'-5' | 15171685        | 15172017 | 15172318 | 18171685 | 301 | 31 | 291 |

|   |       |                 |         |         |          |     |    |     |
|---|-------|-----------------|---------|---------|----------|-----|----|-----|
|   |       | NT_039596.7 (2) |         |         |          |     |    |     |
| 8 | 5'-3' | 4033313         | 4033313 | 4033634 | 24322239 | 321 | 15 | 311 |

|   |       |                 |       |       |          |     |   |     |
|---|-------|-----------------|-------|-------|----------|-----|---|-----|
|   |       | NT_166324.1 (3) |       |       |          |     |   |     |
| 9 | 3'-5' | 13445           | 13670 | 14078 | 25548201 | 408 | 9 | 398 |

|    |       |                 |          |          |          |     |    |     |
|----|-------|-----------------|----------|----------|----------|-----|----|-----|
|    |       | NT_039606.7 (4) |          |          |          |     |    |     |
| 10 | 5'-3' | 591560          | 591560   | 592025   | 28156516 | 465 | 6  | 455 |
| 11 | 5'-3' | 3101477         | 3101477  | 3101891  | 30666433 | 414 | 20 | 404 |
| 12 | 5'-3' | 6496430         | 6496430  | 6496695  | 34061386 | 265 | 26 | 255 |
| 13 | 5'-3' | 10978823        | 10978823 | 10979220 | 38543779 | 397 | 11 | 387 |
| 14 | 5'-3' | 11451976        | 11451976 | 11452370 | 39016932 | 394 | 12 | 384 |
| 15 | 5'-3' | 11762007        | 11762007 | 11762537 | 39326963 | 530 | 18 | 520 |
| 16 | 5'-3' | 11996543        | 11996543 | 11996934 | 39561499 | 391 | 13 | 381 |
| 17 | 5'-3' | 13117790        | 13117790 | 13118263 | 40682746 | 473 | 11 | 463 |
| 18 | 5'-3' | 14130707        | 14130707 | 14131202 | 41695663 | 495 | 26 | 485 |
| 19 | 5'-3' | 20303993        | 20303993 | 20304499 | 47868949 | 506 | 21 | 496 |
| 20 | 5'-3' | 21633130        | 21633130 | 21633471 | 49198086 | 341 | 31 | 331 |
| 21 | 5'-3' | 22018483        | 22018483 | 22018631 | 49583439 | 148 | 28 | 138 |
| 22 | 5'-3' | 22518406        | 22518406 | 22518734 | 50083362 | 328 | 7  | 318 |
| 23 | 5'-3' | 32399939        | 32399939 | 32400215 | 59964895 | 276 | 22 | 266 |



|    |       |          |          |          |           |     |    |     |
|----|-------|----------|----------|----------|-----------|-----|----|-----|
| 24 | 5'-3' | 32741743 | 32741743 | 32742123 | 60306699  | 380 | 14 | 370 |
| 25 | 5'-3' | 41189403 | 41189403 | 41189809 | 68754359  | 406 | 24 | 396 |
| 26 | 5'-3' | 41988777 | 41988777 | 41989161 | 69553733  | 384 | 26 | 374 |
| 27 | 5'-3' | 47807879 | 47807879 | 47808265 | 75372835  | 386 | 25 | 376 |
| 28 | 5'-3' | 49950672 | 49950672 | 49951065 | 77515628  | 393 | 25 | 383 |
| 29 | 5'-3' | 49977970 | 49977970 | 49978404 | 77542926  | 434 | 16 | 424 |
| 30 | 5'-3' | 52909556 | 52909556 | 52910174 | 80474512  | 618 | 12 | 608 |
| 31 | 5'-3' | 53392049 | 53392049 | 53392416 | 80957005  | 367 | 12 | 357 |
| 32 | 5'-3' | 54648376 | 54648376 | 54648728 | 82213332  | 352 | 9  | 342 |
| 33 | 5'-3' | 56944195 | 56944195 | 56944502 | 84509151  | 307 | 29 | 297 |
| 34 | 5'-3' | 57077117 | 57077117 | 57077493 | 84642073  | 376 | 27 | 366 |
| 35 | 5'-3' | 57678029 | 57678029 | 57678321 | 85242985  | 292 | 22 | 282 |
| 36 | 5'-3' | 64264516 | 64264516 | 64264983 | 91829472  | 467 | 10 | 457 |
| 37 | 5'-3' | 65780026 | 65780026 | 65780397 | 93344982  | 371 | 21 | 361 |
| 38 | 5'-3' | 66760687 | 66760687 | 66760985 | 94325643  | 298 | 26 | 288 |
| 39 | 5'-3' | 68232866 | 68232866 | 68233231 | 95797822  | 365 | 9  | 355 |
| 40 | 5'-3' | 70570442 | 70570442 | 70570597 | 98135398  | 155 | 28 | 145 |
| 41 | 5'-3' | 70719105 | 70719105 | 70719525 | 98284061  | 420 | 20 | 410 |
| 42 | 5'-3' | 76131436 | 76131436 | 76131722 | 103696392 | 286 | 28 | 276 |
| 43 | 5'-3' | 78675599 | 78675599 | 78675998 | 106240555 | 399 | 18 | 389 |
| 44 | 5'-3' | 79058198 | 79058198 | 79058530 | 106623154 | 332 | 15 | 322 |
| 45 | 5'-3' | 79814808 | 79814808 | 79815221 | 107379764 | 413 | 20 | 403 |
| 46 | 5'-3' | 80643705 | 80643705 | 80644093 | 108208661 | 388 | 14 | 378 |
| 47 | 5'-3' | 81146246 | 81146246 | 81146635 | 108711202 | 389 | 16 | 379 |
| 48 | 5'-3' | 81729040 | 81729040 | 81729428 | 109293996 | 388 | 15 | 378 |
| 49 | 5'-3' | 84251537 | 84251537 | 84251944 | 111816493 | 407 | 25 | 397 |
| 50 | 5'-3' | 84369256 | 84369256 | 84369618 | 111934212 | 362 | 26 | 352 |
| 51 | 5'-3' | 85404484 | 85404484 | 85404848 | 112969440 | 364 | 26 | 354 |
| 52 | 5'-3' | 85711013 | 85711013 | 85711324 | 113275969 | 311 | 12 | 301 |
| 53 | 5'-3' | 87792026 | 87792026 | 87792473 | 115356982 | 447 | 29 | 437 |
| 54 | 5'-3' | 94062265 | 94062265 | 94062727 | 121627221 | 462 | 6  | 452 |
| 55 | 5'-3' | 94062316 | 94062316 | 94062727 | 121627272 | 411 | 6  | 401 |
| 56 | 5'-3' | 94062367 | 94062367 | 94062758 | 121627323 | 391 | 6  | 381 |
| 57 | 5'-3' | 94062418 | 94062418 | 94062824 | 121627374 | 406 | 6  | 396 |
| 58 | 5'-3' | 94062469 | 94062469 | 94062824 | 121627425 | 355 | 6  | 345 |
| 59 | 5'-3' | 96018278 | 96018278 | 96018680 | 123583234 | 402 | 12 | 392 |
| 60 | 5'-3' | 96779732 | 96779732 | 96780111 | 124344688 | 379 | 23 | 369 |

|    |       |          |          |          |           |     |    |     |
|----|-------|----------|----------|----------|-----------|-----|----|-----|
| 61 | 5'-3' | 97056996 | 97056996 | 97057377 | 124621952 | 381 | 18 | 371 |
| 62 | 3'-5' | 1840226  | 1840636  | 1840859  | 29405182  | 223 | 31 | 213 |
| 63 | 3'-5' | 2349297  | 2349601  | 2349930  | 29914253  | 329 | 9  | 319 |
| 64 | 3'-5' | 5598964  | 5599190  | 5599597  | 33163920  | 407 | 25 | 397 |
| 65 | 3'-5' | 7351531  | 7351731  | 7352164  | 34916487  | 433 | 31 | 423 |
| 66 | 3'-5' | 8237228  | 8237358  | 8237861  | 35802184  | 503 | 20 | 493 |
| 67 | 3'-5' | 9527078  | 9527326  | 9527711  | 37092034  | 385 | 24 | 375 |
| 68 | 3'-5' | 12581369 | 12581631 | 12582002 | 40146325  | 371 | 34 | 361 |
| 69 | 3'-5' | 12664665 | 12664996 | 12665298 | 40229621  | 302 | 18 | 292 |
| 70 | 3'-5' | 18498414 | 18498645 | 18499047 | 46063370  | 402 | 21 | 392 |
| 71 | 3'-5' | 20907772 | 20907975 | 20908405 | 48472728  | 430 | 23 | 420 |
| 72 | 3'-5' | 23018342 | 23018617 | 23018975 | 50583298  | 358 | 21 | 348 |
| 73 | 3'-5' | 23076798 | 23077047 | 23077431 | 50641754  | 384 | 19 | 374 |
| 74 | 3'-5' | 24618899 | 24619204 | 24619532 | 52183855  | 328 | 19 | 318 |
| 75 | 3'-5' | 25257348 | 25257530 | 25257981 | 52822304  | 451 | 8  | 441 |
| 76 | 3'-5' | 27954614 | 27954930 | 27955247 | 55519570  | 317 | 20 | 307 |
| 77 | 3'-5' | 30636061 | 30636439 | 30636694 | 58201017  | 255 | 29 | 245 |
| 78 | 3'-5' | 33808461 | 33808615 | 33809094 | 61373417  | 479 | 27 | 469 |
| 79 | 3'-5' | 36021479 | 36021628 | 36022112 | 63586435  | 484 | 22 | 474 |
| 80 | 3'-5' | 38997766 | 38998041 | 38998399 | 66562722  | 358 | 31 | 348 |
| 81 | 3'-5' | 40232840 | 40232864 | 40233473 | 67797796  | 609 | 19 | 599 |
| 82 | 3'-5' | 41496039 | 41496218 | 41496672 | 69060995  | 454 | 33 | 444 |
| 83 | 3'-5' | 42154526 | 42154773 | 42155159 | 69719482  | 386 | 14 | 376 |
| 84 | 3'-5' | 50919943 | 50920228 | 50920576 | 78484899  | 348 | 7  | 338 |
| 85 | 3'-5' | 53779204 | 53779421 | 53779837 | 81344160  | 416 | 31 | 406 |
| 86 | 3'-5' | 53870715 | 53870903 | 53871348 | 81435671  | 445 | 7  | 435 |
| 87 | 3'-5' | 55716832 | 55717020 | 55717465 | 83281788  | 445 | 15 | 435 |
| 88 | 3'-5' | 57350585 | 57350598 | 57351218 | 84915541  | 620 | 20 | 610 |
| 89 | 3'-5' | 57493515 | 57493786 | 57494148 | 85058471  | 362 | 12 | 352 |
| 90 | 3'-5' | 58450152 | 58450258 | 58450785 | 86015108  | 527 | 34 | 517 |
| 91 | 3'-5' | 59254683 | 59254958 | 59255316 | 86819639  | 358 | 6  | 348 |
| 92 | 3'-5' | 60389760 | 60390026 | 60390393 | 87954716  | 367 | 19 | 357 |
| 93 | 3'-5' | 60880572 | 60880785 | 60881205 | 88445528  | 420 | 11 | 410 |
| 94 | 3'-5' | 61220161 | 61220220 | 61220794 | 88785117  | 574 | 22 | 564 |
| 95 | 3'-5' | 61307494 | 61307741 | 61308127 | 88872450  | 386 | 28 | 376 |
| 96 | 3'-5' | 66054948 | 66055188 | 66055581 | 93619904  | 393 | 15 | 383 |
| 97 | 3'-5' | 66355824 | 66356084 | 66356457 | 93920780  | 373 | 23 | 363 |

|     |       |          |          |          |           |     |    |     |
|-----|-------|----------|----------|----------|-----------|-----|----|-----|
| 98  | 3'-5' | 66908777 | 66908908 | 66909410 | 94473733  | 502 | 22 | 492 |
| 99  | 3'-5' | 68919869 | 68920124 | 68920502 | 96484825  | 378 | 22 | 368 |
| 100 | 3'-5' | 69208631 | 69208784 | 69209264 | 96773587  | 480 | 23 | 470 |
| 101 | 3'-5' | 71924094 | 71924354 | 71924727 | 99489050  | 373 | 27 | 363 |
| 102 | 3'-5' | 73511805 | 73512109 | 73512438 | 101076761 | 329 | 9  | 319 |
| 103 | 3'-5' | 74578091 | 74578269 | 74578724 | 102143047 | 455 | 21 | 445 |
| 104 | 3'-5' | 74688548 | 74688756 | 74689181 | 102253504 | 425 | 23 | 415 |
| 105 | 3'-5' | 76775445 | 76775692 | 76776078 | 104340401 | 386 | 27 | 376 |
| 106 | 3'-5' | 78994730 | 78994883 | 78995363 | 106559686 | 480 | 31 | 470 |
| 107 | 3'-5' | 79030334 | 79030597 | 79030967 | 106595290 | 370 | 33 | 360 |
| 108 | 3'-5' | 80216201 | 80216490 | 80216834 | 107781157 | 344 | 8  | 334 |
| 109 | 3'-5' | 81020439 | 81020641 | 81021072 | 108585395 | 431 | 21 | 421 |
| 110 | 3'-5' | 81156311 | 81156469 | 81156944 | 108721267 | 475 | 33 | 465 |
| 111 | 3'-5' | 81381241 | 81381609 | 81381874 | 108946197 | 265 | 26 | 255 |
| 112 | 3'-5' | 83833802 | 83834100 | 83834435 | 111398758 | 335 | 24 | 325 |
| 113 | 3'-5' | 86564145 | 86564387 | 86564778 | 114129101 | 391 | 20 | 381 |
| 114 | 3'-5' | 86655030 | 86655293 | 86655663 | 114219986 | 370 | 26 | 360 |
| 115 | 3'-5' | 87524351 | 87524559 | 87524984 | 115089307 | 425 | 30 | 415 |
| 116 | 3'-5' | 93048759 | 93048937 | 93049392 | 120613715 | 455 | 7  | 445 |
| 117 | 3'-5' | 94026411 | 94026509 | 94027044 | 121591367 | 535 | 25 | 525 |
| 118 | 3'-5' | 95748238 | 95748516 | 95748871 | 123313194 | 355 | 22 | 345 |

15

|   |       |                 |         |         |         |     |    |     |
|---|-------|-----------------|---------|---------|---------|-----|----|-----|
|   |       | NT_039617.7 (1) |         |         |         |     |    |     |
| 0 | 5'-3' | 851336          | 851336  | 851610  | 3851336 | 274 | 14 | 264 |
| 1 | 5'-3' | 3409730         | 3409730 | 3410055 | 6409730 | 325 | 20 | 315 |
| 2 | 3'-5' | 5017730         | 5017970 | 5018363 | 8017730 | 393 | 22 | 383 |

|    |       |                 |         |         |          |     |    |     |
|----|-------|-----------------|---------|---------|----------|-----|----|-----|
|    |       | NT_039618.7 (2) |         |         |          |     |    |     |
| 3  | 5'-3' | 1272301         | 1272301 | 1272450 | 10256829 | 149 | 25 | 139 |
| 4  | 5'-3' | 3236311         | 3236311 | 3236674 | 12220839 | 363 | 31 | 353 |
| 5  | 5'-3' | 5266271         | 5266271 | 5266716 | 14250799 | 445 | 13 | 435 |
| 6  | 5'-3' | 5366406         | 5366406 | 5366792 | 14350934 | 386 | 17 | 376 |
| 7  | 5'-3' | 5919459         | 5919459 | 5919974 | 14903987 | 515 | 21 | 505 |
| 8  | 5'-3' | 6598898         | 6598898 | 6599247 | 15583426 | 349 | 28 | 339 |
| 9  | 5'-3' | 7108152         | 7108152 | 7108445 | 16092680 | 293 | 16 | 283 |
| 10 | 5'-3' | 8283480         | 8283480 | 8283787 | 17268008 | 307 | 15 | 297 |
| 11 | 5'-3' | 9913632         | 9913632 | 9914168 | 18898160 | 536 | 27 | 526 |

|    |       |          |          |          |          |     |    |     |
|----|-------|----------|----------|----------|----------|-----|----|-----|
| 12 | 5'-3' | 10265673 | 10265673 | 10266134 | 19250201 | 461 | 8  | 451 |
| 13 | 5'-3' | 14066578 | 14066578 | 14067048 | 23051106 | 470 | 28 | 460 |
| 14 | 5'-3' | 15561349 | 15561349 | 15561723 | 24545877 | 374 | 19 | 364 |
| 15 | 5'-3' | 18530281 | 18530281 | 18530643 | 27514809 | 362 | 12 | 352 |
| 16 | 5'-3' | 19659527 | 19659527 | 19659913 | 28644055 | 386 | 13 | 376 |
| 17 | 5'-3' | 23418153 | 23418153 | 23418439 | 32402681 | 286 | 28 | 276 |
| 18 | 5'-3' | 23531969 | 23531969 | 23532587 | 32516497 | 618 | 15 | 608 |
| 19 | 5'-3' | 23825975 | 23825975 | 23826335 | 32810503 | 360 | 19 | 350 |
| 20 | 5'-3' | 25908692 | 25908692 | 25909063 | 34893220 | 371 | 16 | 361 |
| 21 | 5'-3' | 26466897 | 26466897 | 26467371 | 35451425 | 474 | 13 | 464 |
| 22 | 5'-3' | 27939913 | 27939913 | 27940304 | 36924441 | 391 | 24 | 381 |
| 23 | 3'-5' | 130959   | 131254   | 131592   | 9115487  | 338 | 11 | 328 |
| 24 | 3'-5' | 1772321  | 1772681  | 1772954  | 10756849 | 273 | 28 | 263 |
| 25 | 3'-5' | 1851423  | 1851450  | 1852056  | 10835951 | 606 | 17 | 596 |
| 26 | 3'-5' | 4010394  | 4010583  | 4011027  | 12994922 | 444 | 11 | 434 |
| 27 | 3'-5' | 5229161  | 5229422  | 5229794  | 14213689 | 372 | 14 | 362 |
| 28 | 3'-5' | 5914398  | 5914502  | 5915031  | 14898926 | 529 | 25 | 519 |
| 29 | 3'-5' | 7131639  | 7131969  | 7132272  | 16116167 | 303 | 18 | 293 |
| 30 | 3'-5' | 7170422  | 7170707  | 7171055  | 16154950 | 348 | 24 | 338 |
| 31 | 3'-5' | 7441568  | 7441772  | 7442201  | 16426096 | 429 | 16 | 419 |
| 32 | 3'-5' | 12116177 | 12116392 | 12116810 | 21100705 | 418 | 22 | 408 |
| 33 | 3'-5' | 12521784 | 12522027 | 12522417 | 21506312 | 390 | 34 | 380 |
| 34 | 3'-5' | 12940839 | 12941081 | 12941472 | 21925367 | 391 | 27 | 381 |
| 35 | 3'-5' | 13122546 | 13122805 | 13123179 | 22107074 | 374 | 9  | 364 |
| 36 | 3'-5' | 13596722 | 13596973 | 13597355 | 22581250 | 382 | 26 | 372 |
| 37 | 3'-5' | 14859517 | 14859788 | 14860150 | 23844045 | 362 | 8  | 352 |
| 38 | 3'-5' | 15063956 | 15064280 | 15064589 | 24048484 | 309 | 27 | 299 |
| 39 | 3'-5' | 15310380 | 15310508 | 15311013 | 24294908 | 505 | 28 | 495 |
| 40 | 3'-5' | 17064074 | 17064295 | 17064707 | 26048602 | 412 | 11 | 402 |
| 41 | 3'-5' | 18020836 | 18021083 | 18021469 | 27005364 | 386 | 23 | 376 |
| 42 | 3'-5' | 24274698 | 24274855 | 24275331 | 33259226 | 476 | 7  | 466 |
| 43 | 3'-5' | 27629543 | 27629795 | 27630176 | 36614071 | 381 | 6  | 371 |
| 44 | 3'-5' | 27991839 | 27992152 | 27992472 | 36976367 | 320 | 34 | 310 |
| 45 | 3'-5' | 29570264 | 29570368 | 29570897 | 38554792 | 529 | 28 | 519 |
| 46 | 3'-5' | 29603858 | 29604135 | 29604491 | 38588386 | 356 | 22 | 346 |

|    |       |          |          |          |           |     |    |     |
|----|-------|----------|----------|----------|-----------|-----|----|-----|
| 47 | 5'-3' | 141352   | 141352   | 141535   | 38855348  | 183 | 17 | 173 |
| 48 | 5'-3' | 348211   | 348211   | 348633   | 39062207  | 422 | 25 | 412 |
| 49 | 5'-3' | 521242   | 521242   | 521586   | 39235238  | 344 | 31 | 334 |
| 50 | 5'-3' | 573414   | 573414   | 573780   | 39287410  | 366 | 7  | 356 |
| 51 | 5'-3' | 1518536  | 1518536  | 1518964  | 40232532  | 428 | 13 | 418 |
| 52 | 5'-3' | 3278038  | 3278038  | 3278252  | 41992034  | 214 | 9  | 204 |
| 53 | 5'-3' | 5623145  | 5623145  | 5623545  | 44337141  | 400 | 21 | 390 |
| 54 | 5'-3' | 11363780 | 11363780 | 11364170 | 50077776  | 390 | 9  | 380 |
| 55 | 5'-3' | 11790546 | 11790546 | 11790762 | 50504542  | 216 | 12 | 206 |
| 56 | 5'-3' | 15005873 | 15005873 | 15006382 | 53719869  | 509 | 16 | 499 |
| 57 | 5'-3' | 16415598 | 16415598 | 16415992 | 55129594  | 394 | 10 | 384 |
| 58 | 5'-3' | 20868409 | 20868409 | 20868877 | 59582405  | 468 | 21 | 458 |
| 59 | 5'-3' | 22004851 | 22004851 | 22005270 | 60718847  | 419 | 25 | 409 |
| 60 | 5'-3' | 24130910 | 24130910 | 24131371 | 62844906  | 461 | 18 | 451 |
| 61 | 5'-3' | 26456577 | 26456577 | 26456889 | 65170573  | 312 | 27 | 302 |
| 62 | 5'-3' | 31094707 | 31094707 | 31095134 | 69808703  | 427 | 6  | 417 |
| 63 | 5'-3' | 33121169 | 33121169 | 33121733 | 71835165  | 564 | 12 | 554 |
| 64 | 5'-3' | 33491627 | 33491627 | 33492156 | 72205623  | 529 | 31 | 519 |
| 65 | 5'-3' | 34209917 | 34209917 | 34210453 | 72923913  | 536 | 31 | 526 |
| 66 | 5'-3' | 36672675 | 36672675 | 36672986 | 75386671  | 311 | 15 | 301 |
| 67 | 5'-3' | 38610333 | 38610333 | 38610840 | 77324329  | 507 | 24 | 497 |
| 68 | 5'-3' | 46516762 | 46516762 | 46517069 | 85230758  | 307 | 20 | 297 |
| 69 | 5'-3' | 51155664 | 51155664 | 51156105 | 89869660  | 441 | 24 | 431 |
| 70 | 5'-3' | 54560451 | 54560451 | 54560923 | 93274447  | 472 | 23 | 462 |
| 71 | 5'-3' | 57369590 | 57369590 | 57369871 | 96083586  | 281 | 23 | 271 |
| 72 | 5'-3' | 60420822 | 60420822 | 60421257 | 99134818  | 435 | 16 | 425 |
| 73 | 5'-3' | 61833503 | 61833503 | 61833823 | 100547499 | 320 | 17 | 310 |
| 74 | 5'-3' | 62171487 | 62171487 | 62171685 | 100885483 | 198 | 9  | 188 |
| 75 | 3'-5' | 3653144  | 3653423  | 3653777  | 42367140  | 354 | 15 | 344 |
| 76 | 3'-5' | 3980093  | 3980294  | 3980726  | 42694089  | 432 | 18 | 422 |
| 77 | 3'-5' | 4800887  | 4801227  | 4801520  | 43514883  | 293 | 24 | 283 |
| 78 | 3'-5' | 5653064  | 5653172  | 5653697  | 44367060  | 525 | 30 | 515 |
| 79 | 3'-5' | 7649219  | 7649495  | 7649852  | 46363215  | 357 | 19 | 347 |
| 80 | 3'-5' | 8527669  | 8527894  | 8528302  | 47241665  | 408 | 19 | 398 |
| 81 | 3'-5' | 9798566  | 9798834  | 9799199  | 48512562  | 365 | 10 | 355 |
| 82 | 3'-5' | 10564032 | 10564276 | 10564665 | 49278028  | 389 | 18 | 379 |
| 83 | 3'-5' | 11879252 | 11879529 | 11879885 | 50593248  | 356 | 27 | 346 |

|     |       |          |          |          |           |     |    |     |
|-----|-------|----------|----------|----------|-----------|-----|----|-----|
| 84  | 3'-5' | 12377945 | 12378184 | 12378578 | 51091941  | 394 | 33 | 384 |
| 85  | 3'-5' | 14703546 | 14703728 | 14704179 | 53417542  | 451 | 23 | 441 |
| 86  | 3'-5' | 17171413 | 17171865 | 17172046 | 55885409  | 181 | 13 | 171 |
| 87  | 3'-5' | 19404408 | 19404549 | 19405041 | 58118404  | 492 | 8  | 482 |
| 88  | 3'-5' | 20634231 | 20634455 | 20634864 | 59348227  | 409 | 10 | 399 |
| 89  | 3'-5' | 22662998 | 22663252 | 22663631 | 61376994  | 379 | 25 | 369 |
| 90  | 3'-5' | 23500779 | 23500941 | 23501412 | 62214775  | 471 | 24 | 461 |
| 91  | 3'-5' | 23871815 | 23871964 | 23872448 | 62585811  | 484 | 14 | 474 |
| 92  | 3'-5' | 26232379 | 26232568 | 26233012 | 64946375  | 444 | 11 | 434 |
| 93  | 3'-5' | 27704358 | 27704590 | 27704991 | 66418354  | 401 | 30 | 391 |
| 94  | 3'-5' | 33184387 | 33184578 | 33185020 | 71898383  | 442 | 26 | 432 |
| 95  | 3'-5' | 38767067 | 38767190 | 38767700 | 77481063  | 510 | 24 | 500 |
| 96  | 3'-5' | 40453287 | 40453653 | 40453920 | 79167283  | 267 | 32 | 257 |
| 97  | 3'-5' | 44552532 | 44552737 | 44553165 | 83266528  | 428 | 27 | 418 |
| 98  | 3'-5' | 51108630 | 51108895 | 51109263 | 89822626  | 368 | 32 | 358 |
| 99  | 3'-5' | 51429893 | 51430205 | 51430526 | 90143889  | 321 | 29 | 311 |
| 100 | 3'-5' | 51594917 | 51595008 | 51595550 | 90308913  | 542 | 15 | 532 |
| 101 | 3'-5' | 52058038 | 52058136 | 52058671 | 90772034  | 535 | 27 | 525 |
| 102 | 3'-5' | 53098984 | 53099244 | 53099617 | 91812980  | 373 | 12 | 363 |
| 103 | 3'-5' | 55944076 | 55944325 | 55944709 | 94658072  | 384 | 25 | 374 |
| 104 | 3'-5' | 56238447 | 56238820 | 56239080 | 94952443  | 260 | 28 | 250 |
| 105 | 3'-5' | 57284887 | 57285109 | 57285520 | 95998883  | 411 | 32 | 401 |
| 106 | 3'-5' | 63263519 | 63263596 | 63264152 | 101977515 | 556 | 23 | 546 |

16

|    |       |                 |          |          |          |     |    |     |
|----|-------|-----------------|----------|----------|----------|-----|----|-----|
|    |       | NT_039624.7 (1) |          |          |          |     |    |     |
| 0  | 5'-3' | 4078710         | 4078710  | 4079030  | 7078710  | 320 | 19 | 310 |
| 1  | 5'-3' | 6938844         | 6938844  | 6939223  | 9938844  | 379 | 13 | 369 |
| 2  | 5'-3' | 7199911         | 7199911  | 7200331  | 10199911 | 420 | 10 | 410 |
| 3  | 5'-3' | 7213422         | 7213422  | 7213859  | 10213422 | 437 | 24 | 427 |
| 4  | 5'-3' | 11923585        | 11923585 | 11923975 | 14923585 | 390 | 9  | 380 |
| 5  | 5'-3' | 11989652        | 11989652 | 11990047 | 14989652 | 395 | 9  | 385 |
| 6  | 5'-3' | 12689763        | 12689763 | 12690140 | 15689763 | 377 | 17 | 367 |
| 7  | 5'-3' | 12958050        | 12958050 | 12958374 | 15958050 | 324 | 20 | 314 |
| 8  | 5'-3' | 13497728        | 13497728 | 13498199 | 16497728 | 471 | 24 | 461 |
| 9  | 5'-3' | 17082771        | 17082771 | 17083056 | 20082771 | 285 | 9  | 275 |
| 10 | 5'-3' | 17691747        | 17691747 | 17692090 | 20691747 | 343 | 18 | 333 |
| 11 | 5'-3' | 32006667        | 32006667 | 32007111 | 35006667 | 444 | 12 | 434 |

|    |       |          |          |          |          |     |    |     |
|----|-------|----------|----------|----------|----------|-----|----|-----|
| 12 | 5'-3' | 32586487 | 32586487 | 32586876 | 35586487 | 389 | 26 | 379 |
| 13 | 5'-3' | 34334856 | 34334856 | 34335419 | 37334856 | 563 | 24 | 553 |
| 14 | 5'-3' | 41976537 | 41976537 | 41976999 | 44976537 | 462 | 9  | 452 |
| 15 | 5'-3' | 46647069 | 46647069 | 46647438 | 49647069 | 369 | 30 | 359 |
| 16 | 5'-3' | 48772827 | 48772827 | 48773347 | 51772827 | 520 | 31 | 510 |
| 17 | 5'-3' | 49737797 | 49737797 | 49738187 | 52737797 | 390 | 25 | 380 |
| 18 | 5'-3' | 51288056 | 51288056 | 51288444 | 54288056 | 388 | 20 | 378 |
| 19 | 5'-3' | 51633347 | 51633347 | 51633775 | 54633347 | 428 | 31 | 418 |
| 20 | 5'-3' | 52126008 | 52126008 | 52126387 | 55126008 | 379 | 8  | 369 |
| 21 | 5'-3' | 53262772 | 53262772 | 53263118 | 56262772 | 346 | 20 | 336 |
| 22 | 5'-3' | 59915111 | 59915111 | 59915343 | 62915111 | 232 | 25 | 222 |
| 23 | 5'-3' | 61256422 | 61256422 | 61256766 | 64256422 | 344 | 30 | 334 |
| 24 | 5'-3' | 61792644 | 61792644 | 61793017 | 64792644 | 373 | 25 | 363 |
| 25 | 3'-5' | 127732   | 127851   | 128365   | 3127732  | 514 | 32 | 504 |
| 26 | 3'-5' | 2272249  | 2272539  | 2272882  | 5272249  | 343 | 31 | 333 |
| 27 | 3'-5' | 5752131  | 5752332  | 5752764  | 8752131  | 432 | 12 | 422 |
| 28 | 3'-5' | 8643739  | 8644014  | 8644372  | 11643739 | 358 | 34 | 348 |
| 29 | 3'-5' | 14782326 | 14782443 | 14782959 | 17782326 | 516 | 28 | 506 |
| 30 | 3'-5' | 18913164 | 18913247 | 18913797 | 21913164 | 550 | 15 | 540 |
| 31 | 3'-5' | 21870927 | 21871140 | 21871560 | 24870927 | 420 | 28 | 410 |
| 32 | 3'-5' | 23977688 | 23977955 | 23978321 | 26977688 | 366 | 25 | 356 |
| 33 | 3'-5' | 32053863 | 32054164 | 32054496 | 35053863 | 332 | 26 | 322 |
| 34 | 3'-5' | 33187161 | 33187401 | 33187794 | 36187161 | 393 | 32 | 383 |
| 35 | 3'-5' | 33309147 | 33309396 | 33309780 | 36309147 | 384 | 20 | 374 |
| 36 | 3'-5' | 34282362 | 34282712 | 34282995 | 37282362 | 283 | 12 | 273 |
| 37 | 3'-5' | 36155269 | 36155456 | 36155902 | 39155269 | 446 | 22 | 436 |
| 38 | 3'-5' | 36295355 | 36295616 | 36295988 | 39295355 | 372 | 34 | 362 |
| 39 | 3'-5' | 36448409 | 36448709 | 36449042 | 39448409 | 333 | 19 | 323 |
| 40 | 3'-5' | 36822309 | 36822565 | 36822942 | 39822309 | 377 | 31 | 367 |
| 41 | 3'-5' | 37038189 | 37038312 | 37038822 | 40038189 | 510 | 7  | 500 |
| 42 | 3'-5' | 37455466 | 37455725 | 37456099 | 40455466 | 374 | 9  | 364 |
| 43 | 3'-5' | 37467836 | 37468062 | 37468469 | 40467836 | 407 | 16 | 397 |
| 44 | 3'-5' | 38066754 | 38066873 | 38067387 | 41066754 | 514 | 10 | 504 |
| 45 | 3'-5' | 38337850 | 38337965 | 38338483 | 41337850 | 518 | 24 | 508 |
| 46 | 3'-5' | 41803240 | 41803404 | 41803873 | 44803240 | 469 | 22 | 459 |
| 47 | 3'-5' | 42824665 | 42824859 | 42825298 | 45824665 | 439 | 30 | 429 |
| 48 | 3'-5' | 42929118 | 42929390 | 42929751 | 45929118 | 361 | 20 | 351 |

|    |       |          |          |          |          |     |    |     |
|----|-------|----------|----------|----------|----------|-----|----|-----|
| 49 | 3'-5' | 45423153 | 45423630 | 45423786 | 48423153 | 156 | 25 | 146 |
| 50 | 3'-5' | 45890875 | 45891264 | 45891508 | 48890875 | 244 | 32 | 234 |
| 51 | 3'-5' | 50418415 | 50418581 | 50419048 | 53418415 | 467 | 17 | 457 |
| 52 | 3'-5' | 51021843 | 51022113 | 51022476 | 54021843 | 363 | 16 | 353 |
| 53 | 3'-5' | 53425640 | 53425868 | 53426273 | 56425640 | 405 | 31 | 395 |
| 54 | 3'-5' | 54229479 | 54229774 | 54230112 | 57229479 | 338 | 18 | 328 |
| 55 | 3'-5' | 55073593 | 55073775 | 55074226 | 58073593 | 451 | 14 | 441 |
| 56 | 3'-5' | 57452664 | 57452974 | 57453297 | 60452664 | 323 | 20 | 313 |
| 57 | 3'-5' | 57861480 | 57861737 | 57862113 | 60861480 | 376 | 30 | 366 |
| 58 | 3'-5' | 60056006 | 60056507 | 60056639 | 63056006 | 132 | 33 | 122 |
| 59 | 3'-5' | 60087070 | 60087328 | 60087703 | 63087070 | 375 | 15 | 365 |
| 60 | 3'-5' | 60254731 | 60254817 | 60255364 | 63254731 | 547 | 18 | 537 |
| 61 | 3'-5' | 60563576 | 60563821 | 60564209 | 63563576 | 388 | 6  | 378 |

NT\_039625.7 (2)

|    |       |          |          |          |          |     |    |     |
|----|-------|----------|----------|----------|----------|-----|----|-----|
| 62 | 5'-3' | 919203   | 919203   | 919617   | 66214126 | 414 | 18 | 404 |
| 63 | 5'-3' | 4112788  | 4112788  | 4113162  | 69407711 | 374 | 26 | 364 |
| 64 | 5'-3' | 5095712  | 5095712  | 5096070  | 70390635 | 358 | 25 | 348 |
| 65 | 5'-3' | 5270209  | 5270209  | 5270516  | 70565132 | 307 | 19 | 297 |
| 66 | 5'-3' | 8224120  | 8224120  | 8224500  | 73519043 | 380 | 17 | 370 |
| 67 | 5'-3' | 8995064  | 8995064  | 8995458  | 74289987 | 394 | 8  | 384 |
| 68 | 5'-3' | 9751689  | 9751689  | 9752137  | 75046612 | 448 | 19 | 438 |
| 69 | 5'-3' | 10307058 | 10307058 | 10307417 | 75601981 | 359 | 20 | 349 |
| 70 | 5'-3' | 11878167 | 11878167 | 11878573 | 77173090 | 406 | 17 | 396 |
| 71 | 5'-3' | 16611379 | 16611379 | 16611788 | 81906302 | 409 | 17 | 399 |
| 72 | 5'-3' | 17009479 | 17009479 | 17009869 | 82304402 | 390 | 14 | 380 |
| 73 | 5'-3' | 17137070 | 17137070 | 17137667 | 82431993 | 597 | 14 | 587 |
| 74 | 5'-3' | 17301767 | 17301767 | 17302153 | 82596690 | 386 | 30 | 376 |
| 75 | 5'-3' | 22148072 | 22148072 | 22148544 | 87442995 | 472 | 24 | 462 |
| 76 | 5'-3' | 27068921 | 27068921 | 27069367 | 92363844 | 446 | 14 | 436 |
| 77 | 5'-3' | 29608046 | 29608046 | 29608444 | 94902969 | 398 | 31 | 388 |
| 78 | 3'-5' | 340697   | 340977   | 341330   | 65635620 | 353 | 9  | 343 |
| 79 | 3'-5' | 449370   | 449722   | 450003   | 65744293 | 281 | 32 | 271 |
| 80 | 3'-5' | 1014415  | 1014655  | 1015048  | 66309338 | 393 | 16 | 383 |
| 81 | 3'-5' | 2477189  | 2477267  | 2477822  | 67772112 | 555 | 8  | 545 |
| 82 | 3'-5' | 2699015  | 2699230  | 2699648  | 67993938 | 418 | 29 | 408 |
| 83 | 3'-5' | 3461191  | 3461409  | 3461824  | 68756114 | 415 | 22 | 405 |



|     |       |          |          |          |          |     |    |     |
|-----|-------|----------|----------|----------|----------|-----|----|-----|
| 84  | 3'-5' | 3605017  | 3605314  | 3605650  | 68899940 | 336 | 21 | 326 |
| 85  | 3'-5' | 3628497  | 3628838  | 3629130  | 68923420 | 292 | 28 | 282 |
| 86  | 3'-5' | 3764166  | 3764400  | 3764799  | 69059089 | 399 | 25 | 389 |
| 87  | 3'-5' | 4093218  | 4093460  | 4093851  | 69388141 | 391 | 27 | 381 |
| 88  | 3'-5' | 4367368  | 4367631  | 4368001  | 69662291 | 370 | 23 | 360 |
| 89  | 3'-5' | 5937004  | 5937247  | 5937637  | 71231927 | 390 | 19 | 380 |
| 90  | 3'-5' | 7281296  | 7281637  | 7281929  | 72576219 | 292 | 21 | 282 |
| 91  | 3'-5' | 8229609  | 8229848  | 8230242  | 73524532 | 394 | 31 | 384 |
| 92  | 3'-5' | 11424399 | 11424608 | 11425032 | 76719322 | 424 | 14 | 414 |
| 93  | 3'-5' | 16634734 | 16635118 | 16635367 | 81929657 | 249 | 15 | 239 |
| 94  | 3'-5' | 17615834 | 17616090 | 17616467 | 82910757 | 377 | 14 | 367 |
| 95  | 3'-5' | 17892169 | 17892472 | 17892802 | 83187092 | 330 | 21 | 320 |
| 96  | 3'-5' | 19433660 | 19433902 | 19434293 | 84728583 | 391 | 33 | 381 |
| 97  | 3'-5' | 29324346 | 29324553 | 29324979 | 94619269 | 426 | 23 | 416 |
| 98  | 3'-5' | 31048167 | 31048347 | 31048800 | 96343090 | 453 | 22 | 443 |
| 99  | 3'-5' | 31310368 | 31310499 | 31311001 | 96605291 | 502 | 25 | 492 |
| 100 | 3'-5' | 32926962 | 32926984 | 32927595 | 98221885 | 611 | 22 | 601 |

17

|    |       |                 |         |         |         |     |    |     |
|----|-------|-----------------|---------|---------|---------|-----|----|-----|
|    |       | NT_039636.7 (1) |         |         |         |     |    |     |
| 0  | 5'-3' | 889265          | 889265  | 889664  | 3889265 | 399 | 28 | 389 |
| 1  | 5'-3' | 2459086         | 2459086 | 2459630 | 5459086 | 544 | 9  | 534 |
| 2  | 5'-3' | 3672015         | 3672015 | 3672399 | 6672015 | 384 | 9  | 374 |
| 3  | 5'-3' | 3877217         | 3877217 | 3877601 | 6877217 | 384 | 9  | 374 |
| 4  | 3'-5' | 917189          | 917304  | 917822  | 3917189 | 518 | 14 | 508 |
| 5  | 3'-5' | 2258829         | 2259038 | 2259462 | 5258829 | 424 | 17 | 414 |
| 6  | 3'-5' | 3040365         | 3040543 | 3040998 | 6040365 | 455 | 28 | 445 |
| 7  | 3'-5' | 3411048         | 3411316 | 3411681 | 6411048 | 365 | 9  | 355 |
| 8  | 3'-5' | 3582268         | 3582489 | 3582901 | 6582268 | 412 | 9  | 402 |
| 9  | 3'-5' | 3788442         | 3788663 | 3789075 | 6788442 | 412 | 9  | 402 |
| 10 | 3'-5' | 4571465         | 4571865 | 4572098 | 7571465 | 233 | 12 | 223 |

|    |       |                 |         |         |          |     |    |     |
|----|-------|-----------------|---------|---------|----------|-----|----|-----|
|    |       | NT_039638.7 (2) |         |         |          |     |    |     |
| 11 | 5'-3' | 5128594         | 5128594 | 5128985 | 12842534 | 391 | 21 | 381 |
| 12 | 3'-5' | 3643766         | 3643863 | 3644399 | 11357706 | 536 | 16 | 526 |
| 13 | 3'-5' | 5591863         | 5592274 | 5592496 | 13305803 | 222 | 12 | 212 |
| 14 | 3'-5' | 5870390         | 5870802 | 5871023 | 13584330 | 221 | 12 | 211 |

NT\_039649.7 (3)

|    |       |          |          |          |          |     |    |     |
|----|-------|----------|----------|----------|----------|-----|----|-----|
| 15 | 5'-3' | 1986818  | 1986818  | 1987378  | 15793032 | 560 | 19 | 550 |
| 16 | 5'-3' | 3315379  | 3315379  | 3315749  | 17121593 | 370 | 29 | 360 |
| 17 | 5'-3' | 5990493  | 5990493  | 5990860  | 19796707 | 367 | 23 | 357 |
| 18 | 5'-3' | 6103462  | 6103462  | 6103822  | 19909676 | 360 | 23 | 350 |
| 19 | 5'-3' | 16753610 | 16753610 | 16754114 | 30559824 | 504 | 26 | 494 |
| 20 | 5'-3' | 23098356 | 23098356 | 23098756 | 36904570 | 400 | 20 | 390 |
| 21 | 5'-3' | 25554503 | 25554503 | 25554857 | 39360717 | 354 | 29 | 344 |
| 22 | 5'-3' | 25976995 | 25976995 | 25977365 | 39783209 | 370 | 12 | 360 |
| 23 | 5'-3' | 26260856 | 26260856 | 26261210 | 40067070 | 354 | 29 | 344 |
| 24 | 5'-3' | 26925778 | 26925778 | 26926200 | 40731992 | 422 | 31 | 412 |
| 25 | 5'-3' | 27513768 | 27513768 | 27514095 | 41319982 | 327 | 22 | 317 |
| 26 | 5'-3' | 28855104 | 28855104 | 28855492 | 42661318 | 388 | 10 | 378 |
| 27 | 5'-3' | 35854888 | 35854888 | 35855462 | 49661102 | 574 | 29 | 564 |
| 28 | 5'-3' | 36594640 | 36594640 | 36595108 | 50400854 | 468 | 22 | 458 |
| 29 | 5'-3' | 37103109 | 37103109 | 37103643 | 50909323 | 534 | 31 | 524 |
| 30 | 5'-3' | 37114778 | 37114778 | 37115162 | 50920992 | 384 | 14 | 374 |
| 31 | 5'-3' | 40397064 | 40397064 | 40397436 | 54203278 | 372 | 7  | 362 |
| 32 | 5'-3' | 43796317 | 43796317 | 43796722 | 57602531 | 405 | 11 | 395 |
| 33 | 5'-3' | 44469457 | 44469457 | 44469776 | 58275671 | 319 | 26 | 309 |
| 34 | 5'-3' | 46497727 | 46497727 | 46498104 | 60303941 | 377 | 17 | 367 |
| 35 | 5'-3' | 46962011 | 46962011 | 46962400 | 60768225 | 389 | 19 | 379 |
| 36 | 5'-3' | 48208195 | 48208195 | 48208587 | 62014409 | 392 | 28 | 382 |
| 37 | 5'-3' | 52183242 | 52183242 | 52183789 | 65989456 | 547 | 25 | 537 |
| 38 | 5'-3' | 59930841 | 59930841 | 59931166 | 73737055 | 325 | 8  | 315 |
| 39 | 5'-3' | 60545437 | 60545437 | 60545937 | 74351651 | 500 | 29 | 490 |
| 40 | 5'-3' | 61821024 | 61821024 | 61821440 | 75627238 | 416 | 7  | 406 |
| 41 | 5'-3' | 65516879 | 65516879 | 65517031 | 79323093 | 152 | 22 | 142 |
| 42 | 5'-3' | 66501378 | 66501378 | 66501726 | 80307592 | 348 | 27 | 338 |
| 43 | 5'-3' | 66501396 | 66501396 | 66501726 | 80307610 | 330 | 9  | 320 |
| 44 | 5'-3' | 68136682 | 68136682 | 68137046 | 81942896 | 364 | 16 | 354 |
| 45 | 5'-3' | 68500290 | 68500290 | 68500634 | 82306504 | 344 | 18 | 334 |
| 46 | 5'-3' | 69674341 | 69674341 | 69674718 | 83480555 | 377 | 23 | 367 |
| 47 | 5'-3' | 70875335 | 70875335 | 70875597 | 84681549 | 262 | 16 | 252 |
| 48 | 5'-3' | 71322767 | 71322767 | 71323157 | 85128981 | 390 | 30 | 380 |
| 49 | 5'-3' | 72002535 | 72002535 | 72002850 | 85808749 | 315 | 15 | 305 |
| 50 | 5'-3' | 74388815 | 74388815 | 74389353 | 88195029 | 538 | 7  | 528 |

|    |       |          |          |          |          |     |    |     |
|----|-------|----------|----------|----------|----------|-----|----|-----|
| 51 | 5'-3' | 76335165 | 76335165 | 76335455 | 90141379 | 290 | 7  | 280 |
| 52 | 5'-3' | 77814664 | 77814664 | 77814971 | 91620878 | 307 | 7  | 297 |
| 53 | 5'-3' | 79802034 | 79802034 | 79802369 | 93608248 | 335 | 6  | 325 |
| 54 | 3'-5' | 644334   | 644600   | 644967   | 14450548 | 367 | 33 | 357 |
| 55 | 3'-5' | 2312989  | 2313109  | 2313622  | 16119203 | 513 | 16 | 503 |
| 56 | 3'-5' | 2371241  | 2371539  | 2371874  | 16177455 | 335 | 24 | 325 |
| 57 | 3'-5' | 2935392  | 2935600  | 2936025  | 16741606 | 425 | 9  | 415 |
| 58 | 3'-5' | 5390015  | 5390239  | 5390648  | 19196229 | 409 | 26 | 399 |
| 59 | 3'-5' | 6006555  | 6006827  | 6007188  | 19812769 | 361 | 28 | 351 |
| 60 | 3'-5' | 6458314  | 6458588  | 6458947  | 20264528 | 359 | 27 | 349 |
| 61 | 3'-5' | 6666242  | 6666430  | 6666875  | 20472456 | 445 | 10 | 435 |
| 62 | 3'-5' | 6780451  | 6780708  | 6781084  | 20586665 | 376 | 18 | 366 |
| 63 | 3'-5' | 15322973 | 15323227 | 15323606 | 29129187 | 379 | 31 | 369 |
| 64 | 3'-5' | 19388632 | 19388973 | 19389265 | 33194846 | 292 | 29 | 282 |
| 65 | 3'-5' | 25838120 | 25838387 | 25838753 | 39644334 | 366 | 33 | 356 |
| 66 | 3'-5' | 25955809 | 25956097 | 25956442 | 39762023 | 345 | 32 | 335 |
| 67 | 3'-5' | 26650873 | 26651249 | 26651506 | 40457087 | 257 | 17 | 247 |
| 68 | 3'-5' | 30915022 | 30915410 | 30915655 | 44721236 | 245 | 16 | 235 |
| 69 | 3'-5' | 31003496 | 31003857 | 31004129 | 44809710 | 272 | 12 | 262 |
| 70 | 3'-5' | 31774286 | 31774546 | 31774919 | 45580500 | 373 | 9  | 363 |
| 71 | 3'-5' | 37616529 | 37616858 | 37617162 | 51422743 | 304 | 13 | 294 |
| 72 | 3'-5' | 46211033 | 46211346 | 46211666 | 60017247 | 320 | 28 | 310 |
| 73 | 3'-5' | 46447152 | 46447419 | 46447785 | 60253366 | 366 | 8  | 356 |
| 74 | 3'-5' | 47105060 | 47105424 | 47105693 | 60911274 | 269 | 31 | 259 |
| 75 | 3'-5' | 47490408 | 47490595 | 47491041 | 61296622 | 446 | 29 | 436 |
| 76 | 3'-5' | 47592240 | 47592556 | 47592873 | 61398454 | 317 | 29 | 307 |
| 77 | 3'-5' | 47787587 | 47787809 | 47788220 | 61593801 | 411 | 18 | 401 |
| 78 | 3'-5' | 52352212 | 52352533 | 52352845 | 66158426 | 312 | 13 | 302 |
| 79 | 3'-5' | 57287014 | 57287292 | 57287647 | 71093228 | 355 | 19 | 345 |
| 80 | 3'-5' | 59659137 | 59659469 | 59659770 | 73465351 | 301 | 22 | 291 |
| 81 | 3'-5' | 63010883 | 63011036 | 63011516 | 76817097 | 480 | 25 | 470 |
| 82 | 3'-5' | 63341807 | 63341998 | 63342440 | 77148021 | 442 | 32 | 432 |
| 83 | 3'-5' | 71735064 | 71735508 | 71735697 | 85541278 | 189 | 15 | 179 |
| 84 | 3'-5' | 74263628 | 74263950 | 74264261 | 88069842 | 311 | 18 | 301 |
| 85 | 3'-5' | 75967793 | 75968021 | 75968426 | 89774007 | 405 | 10 | 395 |
| 86 | 3'-5' | 77383019 | 77383250 | 77383652 | 91189233 | 402 | 12 | 392 |
| 87 | 3'-5' | 77792938 | 77793081 | 77793571 | 91599152 | 490 | 28 | 480 |

|    |       |          |          |          |          |     |    |     |
|----|-------|----------|----------|----------|----------|-----|----|-----|
| 88 | 3'-5' | 78669222 | 78669534 | 78669855 | 92475436 | 321 | 11 | 311 |
| 89 | 3'-5' | 79251529 | 79251828 | 79252162 | 93057743 | 334 | 10 | 324 |
| 90 | 3'-5' | 80505398 | 80505607 | 80506031 | 94311612 | 424 | 33 | 414 |

18

|    |       |                 |          |          |          |     |    |     |
|----|-------|-----------------|----------|----------|----------|-----|----|-----|
|    |       | NT_039674.7 (1) |          |          |          |     |    |     |
| 0  | 5'-3' | 519154          | 519154   | 519555   | 3519154  | 401 | 31 | 391 |
| 1  | 5'-3' | 12581218        | 12581218 | 12581750 | 15581218 | 532 | 31 | 522 |
| 2  | 5'-3' | 15579038        | 15579038 | 15579508 | 18579038 | 470 | 25 | 460 |
| 3  | 5'-3' | 16831220        | 16831220 | 16831569 | 19831220 | 349 | 6  | 339 |
| 4  | 5'-3' | 18463849        | 18463849 | 18464204 | 21463849 | 355 | 29 | 345 |
| 5  | 5'-3' | 19789227        | 19789227 | 19789595 | 22789227 | 368 | 21 | 358 |
| 6  | 5'-3' | 23786673        | 23786673 | 23787144 | 26786673 | 471 | 7  | 461 |
| 7  | 5'-3' | 26766413        | 26766413 | 26766749 | 29766413 | 336 | 22 | 326 |
| 8  | 5'-3' | 26990227        | 26990227 | 26990548 | 29990227 | 321 | 29 | 311 |
| 9  | 5'-3' | 30067197        | 30067197 | 30067605 | 33067197 | 408 | 23 | 398 |
| 10 | 5'-3' | 31636297        | 31636297 | 31636553 | 34636297 | 256 | 20 | 246 |
| 11 | 5'-3' | 32108239        | 32108239 | 32108640 | 35108239 | 401 | 26 | 391 |
| 12 | 5'-3' | 32735465        | 32735465 | 32735830 | 35735465 | 365 | 30 | 355 |
| 13 | 5'-3' | 33905526        | 33905526 | 33905947 | 36905526 | 421 | 13 | 411 |
| 14 | 5'-3' | 37373433        | 37373433 | 37373909 | 40373433 | 476 | 21 | 466 |
| 15 | 5'-3' | 39923282        | 39923282 | 39923597 | 42923282 | 315 | 14 | 305 |
| 16 | 5'-3' | 42383242        | 42383242 | 42383628 | 45383242 | 386 | 27 | 376 |
| 17 | 5'-3' | 44039351        | 44039351 | 44039660 | 47039351 | 309 | 18 | 299 |
| 18 | 5'-3' | 44504532        | 44504532 | 44504834 | 47504532 | 302 | 21 | 292 |
| 19 | 5'-3' | 45198838        | 45198838 | 45199019 | 48198838 | 181 | 31 | 171 |
| 20 | 5'-3' | 45576504        | 45576504 | 45576858 | 48576504 | 354 | 9  | 344 |
| 21 | 5'-3' | 46181364        | 46181364 | 46181512 | 49181364 | 148 | 12 | 138 |
| 22 | 5'-3' | 47889766        | 47889766 | 47890074 | 50889766 | 308 | 16 | 298 |
| 23 | 5'-3' | 49096790        | 49096790 | 49097129 | 52096790 | 339 | 15 | 329 |
| 24 | 5'-3' | 52776986        | 52776986 | 52777285 | 55776986 | 299 | 9  | 289 |
| 25 | 5'-3' | 53643931        | 53643931 | 53644214 | 56643931 | 283 | 28 | 273 |
| 26 | 5'-3' | 57066812        | 57066812 | 57067014 | 60066812 | 202 | 17 | 192 |
| 27 | 5'-3' | 57124505        | 57124505 | 57124850 | 60124505 | 345 | 8  | 335 |
| 28 | 5'-3' | 57464131        | 57464131 | 57464392 | 60464131 | 261 | 9  | 251 |
| 29 | 5'-3' | 61946246        | 61946246 | 61946636 | 64946246 | 390 | 21 | 380 |
| 30 | 5'-3' | 61946304        | 61946304 | 61946636 | 64946304 | 332 | 21 | 322 |
| 31 | 5'-3' | 61946358        | 61946358 | 61946794 | 64946358 | 436 | 8  | 426 |

|    |       |          |          |          |          |     |    |     |
|----|-------|----------|----------|----------|----------|-----|----|-----|
| 32 | 5'-3' | 67411291 | 67411291 | 67411693 | 70411291 | 402 | 23 | 392 |
| 33 | 5'-3' | 67551569 | 67551569 | 67551883 | 70551569 | 314 | 26 | 304 |
| 34 | 5'-3' | 68861094 | 68861094 | 68861485 | 71861094 | 391 | 14 | 381 |
| 35 | 5'-3' | 69442999 | 69442999 | 69443473 | 72442999 | 474 | 14 | 464 |
| 36 | 3'-5' | 981764   | 982162   | 982397   | 3981764  | 235 | 12 | 225 |
| 37 | 3'-5' | 1167529  | 1167674  | 1168162  | 4167529  | 488 | 6  | 478 |
| 38 | 3'-5' | 2118989  | 2119266  | 2119622  | 5118989  | 356 | 9  | 346 |
| 39 | 3'-5' | 2949978  | 2950209  | 2950611  | 5949978  | 402 | 21 | 392 |
| 40 | 3'-5' | 5232266  | 5232356  | 5232899  | 8232266  | 543 | 30 | 533 |
| 41 | 3'-5' | 7449036  | 7449227  | 7449669  | 10449036 | 442 | 21 | 432 |
| 42 | 3'-5' | 10510420 | 10510770 | 10511053 | 13510420 | 283 | 22 | 273 |
| 43 | 3'-5' | 15067848 | 15068102 | 15068481 | 18067848 | 379 | 33 | 369 |
| 44 | 3'-5' | 16182934 | 16183248 | 16183567 | 19182934 | 319 | 18 | 309 |
| 45 | 3'-5' | 16831025 | 16831280 | 16831658 | 19831025 | 378 | 16 | 368 |
| 46 | 3'-5' | 18937978 | 18938224 | 18938611 | 21937978 | 387 | 27 | 377 |
| 47 | 3'-5' | 21213766 | 21214018 | 21214399 | 24213766 | 381 | 7  | 371 |
| 48 | 3'-5' | 24227283 | 24227759 | 24227916 | 27227283 | 157 | 21 | 147 |
| 49 | 3'-5' | 24290570 | 24290787 | 24291203 | 27290570 | 416 | 19 | 406 |
| 50 | 3'-5' | 24512075 | 24512270 | 24512708 | 27512075 | 438 | 23 | 428 |
| 51 | 3'-5' | 25118564 | 25118868 | 25119197 | 28118564 | 329 | 32 | 319 |
| 52 | 3'-5' | 30049229 | 30049478 | 30049862 | 33049229 | 384 | 21 | 374 |
| 53 | 3'-5' | 37249704 | 37250158 | 37250337 | 40249704 | 179 | 19 | 169 |
| 54 | 3'-5' | 38696843 | 38697090 | 38697476 | 41696843 | 386 | 24 | 376 |
| 55 | 3'-5' | 41284467 | 41284758 | 41285100 | 44284467 | 342 | 30 | 332 |
| 56 | 3'-5' | 44975636 | 44975796 | 44976269 | 47975636 | 473 | 7  | 463 |
| 57 | 3'-5' | 45007457 | 45007720 | 45008090 | 48007457 | 370 | 9  | 360 |
| 58 | 3'-5' | 49808811 | 49809106 | 49809444 | 52808811 | 338 | 9  | 328 |
| 59 | 3'-5' | 51237637 | 51237648 | 51238270 | 54237637 | 622 | 23 | 612 |
| 60 | 3'-5' | 52713604 | 52713704 | 52714237 | 55713604 | 533 | 19 | 523 |
| 61 | 3'-5' | 53497180 | 53497499 | 53497813 | 56497180 | 314 | 34 | 304 |
| 63 | 3'-5' | 59891808 | 59892174 | 59892441 | 62891808 | 267 | 34 | 257 |
| 64 | 3'-5' | 60483801 | 60484236 | 60484434 | 63483801 | 198 | 25 | 188 |
| 65 | 3'-5' | 60731041 | 60731199 | 60731674 | 63731041 | 475 | 24 | 465 |
| 66 | 3'-5' | 65323168 | 65323570 | 65323801 | 68323168 | 231 | 7  | 221 |
| 67 | 3'-5' | 65950022 | 65950281 | 65950655 | 68950022 | 374 | 9  | 364 |
| 68 | 3'-5' | 69610654 | 69610935 | 69611287 | 72610654 | 352 | 15 | 342 |
| 69 | 3'-5' | 69620994 | 69621246 | 69621627 | 72620994 | 381 | 28 | 371 |

|                 |       |          |          |          |          |     |    |     |
|-----------------|-------|----------|----------|----------|----------|-----|----|-----|
| 70              | 3'-5' | 70115556 | 70115811 | 70116189 | 73115556 | 378 | 28 | 368 |
| 71              | 3'-5' | 70454224 | 70454409 | 70454857 | 73454224 | 448 | 23 | 438 |
| 72              | 3'-5' | 73043090 | 73043306 | 73043723 | 76043090 | 417 | 23 | 407 |
| NT_039675.7 (2) |       |          |          |          |          |     |    |     |
| 75              | 5'-3' | 536229   | 536229   | 536635   | 77305377 | 406 | 20 | 396 |
| 76              | 5'-3' | 620445   | 620445   | 620838   | 77389593 | 393 | 26 | 383 |
| 77              | 3'-5' | 124228   | 124353   | 124861   | 76893376 | 508 | 11 | 498 |
| 78              | 3'-5' | 949728   | 950013   | 950361   | 77718876 | 348 | 30 | 338 |
| NT_039676.7 (3) |       |          |          |          |          |     |    |     |
| 79              | 5'-3' | 716383   | 716383   | 716860   | 78846001 | 477 | 31 | 467 |
| 80              | 5'-3' | 1835169  | 1835169  | 1835776  | 79964787 | 607 | 9  | 597 |
| 81              | 5'-3' | 3219520  | 3219520  | 3219942  | 81349138 | 422 | 20 | 412 |
| 82              | 5'-3' | 3829911  | 3829911  | 3830491  | 81959529 | 580 | 7  | 570 |
| 83              | 5'-3' | 4211748  | 4211748  | 4212092  | 82341366 | 344 | 17 | 334 |
| NT_039678.7 (4) |       |          |          |          |          |     |    |     |
| 84              | 5'-3' | 199961   | 199961   | 200252   | 82590332 | 291 | 27 | 281 |
| 85              | 5'-3' | 2000888  | 2000888  | 2001049  | 84391259 | 161 | 23 | 151 |
| 86              | 5'-3' | 6375039  | 6375039  | 6375399  | 88765410 | 360 | 9  | 350 |
| 87              | 5'-3' | 7008168  | 7008168  | 7008478  | 89398539 | 310 | 15 | 300 |
| 88              | 3'-5' | 368630   | 368662   | 369263   | 82759001 | 601 | 29 | 591 |
| 89              | 3'-5' | 605154   | 605416   | 605787   | 82995525 | 371 | 22 | 361 |
| 90              | 3'-5' | 1278384  | 1278674  | 1279017  | 83668755 | 343 | 22 | 333 |
| 91              | 3'-5' | 2751690  | 2752066  | 2752323  | 85142061 | 257 | 20 | 247 |
| 92              | 3'-5' | 3551166  | 3551417  | 3551799  | 85941537 | 382 | 16 | 372 |
| NT_082868.6 (1) |       |          |          |          |          |     |    |     |
| 0               | 5'-3' | 805940   | 805940   | 806545   | 3805940  | 605 | 21 | 595 |
| 1               | 5'-3' | 1728528  | 1728528  | 1728990  | 4728528  | 462 | 11 | 452 |
| NT_039687.7 (2) |       |          |          |          |          |     |    |     |
| 2               | 5'-3' | 1316747  | 1316747  | 1317149  | 8204852  | 402 | 14 | 392 |
| 3               | 5'-3' | 1587356  | 1587356  | 1587683  | 8475461  | 327 | 14 | 317 |
| 4               | 5'-3' | 2289023  | 2289023  | 2289411  | 9177128  | 388 | 21 | 378 |
| 5               | 5'-3' | 8361377  | 8361377  | 8361670  | 15249482 | 293 | 26 | 283 |

|    |       |          |          |          |          |     |    |     |
|----|-------|----------|----------|----------|----------|-----|----|-----|
| 6  | 5'-3' | 8421454  | 8421454  | 8421847  | 15309559 | 393 | 24 | 383 |
| 7  | 5'-3' | 8948262  | 8948262  | 8948851  | 15836367 | 589 | 29 | 579 |
| 8  | 5'-3' | 10046554 | 10046554 | 10046968 | 16934659 | 414 | 30 | 404 |
| 9  | 5'-3' | 12043524 | 12043524 | 12043905 | 18931629 | 381 | 21 | 371 |
| 10 | 5'-3' | 12183248 | 12183248 | 12183708 | 19071353 | 460 | 11 | 450 |
| 11 | 5'-3' | 14261693 | 14261693 | 14262288 | 21149798 | 595 | 21 | 585 |
| 12 | 5'-3' | 20431434 | 20431434 | 20431889 | 27319539 | 455 | 8  | 445 |
| 13 | 5'-3' | 22138970 | 22138970 | 22139334 | 29027075 | 364 | 25 | 354 |
| 14 | 5'-3' | 22226262 | 22226262 | 22226655 | 29114367 | 393 | 13 | 383 |
| 15 | 5'-3' | 22358670 | 22358670 | 22359130 | 29246775 | 460 | 13 | 450 |
| 16 | 5'-3' | 23473908 | 23473908 | 23474331 | 30362013 | 423 | 27 | 413 |
| 17 | 5'-3' | 29354220 | 29354220 | 29354572 | 36242325 | 352 | 20 | 342 |
| 18 | 5'-3' | 32182303 | 32182303 | 32182700 | 39070408 | 397 | 17 | 387 |
| 19 | 5'-3' | 32950061 | 32950061 | 32950440 | 39838166 | 379 | 11 | 369 |
| 20 | 5'-3' | 33025642 | 33025642 | 33026001 | 39913747 | 359 | 11 | 349 |
| 21 | 5'-3' | 44239069 | 44239069 | 44239462 | 51127174 | 393 | 22 | 383 |
| 22 | 5'-3' | 44679525 | 44679525 | 44680060 | 51567630 | 535 | 9  | 525 |
| 23 | 5'-3' | 44831927 | 44831927 | 44832237 | 51720032 | 310 | 27 | 300 |
| 24 | 5'-3' | 44979060 | 44979060 | 44979419 | 51867165 | 359 | 19 | 349 |
| 25 | 5'-3' | 45305272 | 45305272 | 45305632 | 52193377 | 360 | 8  | 350 |
| 26 | 5'-3' | 47937150 | 47937150 | 47937667 | 54825255 | 517 | 26 | 507 |
| 27 | 5'-3' | 52285740 | 52285740 | 52286172 | 59173845 | 432 | 13 | 422 |
| 28 | 3'-5' | 1157165  | 1157450  | 1157798  | 8045270  | 348 | 27 | 338 |
| 29 | 3'-5' | 1453782  | 1454067  | 1454415  | 8341887  | 348 | 27 | 338 |
| 30 | 3'-5' | 2603938  | 2604304  | 2604571  | 9492043  | 267 | 32 | 257 |
| 31 | 3'-5' | 4744190  | 4744368  | 4744823  | 11632295 | 455 | 10 | 445 |
| 32 | 3'-5' | 8312707  | 8312853  | 8313340  | 15200812 | 487 | 18 | 477 |
| 33 | 3'-5' | 11513066 | 11513354 | 11513699 | 18401171 | 345 | 10 | 335 |
| 34 | 3'-5' | 12519817 | 12520273 | 12520450 | 19407922 | 177 | 13 | 167 |
| 35 | 3'-5' | 13396979 | 13397221 | 13397612 | 20285084 | 391 | 23 | 381 |
| 36 | 3'-5' | 13505617 | 13505739 | 13506250 | 20393722 | 511 | 9  | 501 |
| 37 | 3'-5' | 22184764 | 22185000 | 22185397 | 29072869 | 397 | 30 | 387 |
| 38 | 3'-5' | 22374632 | 22374831 | 22375265 | 29262737 | 434 | 20 | 424 |
| 39 | 3'-5' | 23596240 | 23596466 | 23596873 | 30484345 | 407 | 13 | 397 |
| 40 | 3'-5' | 24669767 | 24670021 | 24670400 | 31557872 | 379 | 30 | 369 |
| 41 | 3'-5' | 28478126 | 28478264 | 28478759 | 35366231 | 495 | 11 | 485 |
| 42 | 3'-5' | 30265859 | 30266109 | 30266492 | 37153964 | 383 | 21 | 373 |

|    |       |          |          |          |          |     |    |     |
|----|-------|----------|----------|----------|----------|-----|----|-----|
| 43 | 3'-5' | 31451235 | 31451525 | 31451868 | 38339340 | 343 | 24 | 333 |
| 44 | 3'-5' | 34641913 | 34642118 | 34642546 | 41530018 | 428 | 28 | 418 |
| 45 | 3'-5' | 36575738 | 36575973 | 36576371 | 43463843 | 398 | 28 | 388 |
| 46 | 3'-5' | 40008728 | 40008970 | 40009361 | 46896833 | 391 | 26 | 381 |
| 47 | 3'-5' | 43492330 | 43492550 | 43492963 | 50380435 | 413 | 31 | 403 |
| 48 | 3'-5' | 46542243 | 46542363 | 46542876 | 53430348 | 513 | 34 | 503 |
| 49 | 3'-5' | 46805014 | 46805284 | 46805647 | 53693119 | 363 | 23 | 353 |
| 50 | 3'-5' | 47846077 | 47846289 | 47846710 | 54734182 | 421 | 22 | 411 |
| 51 | 3'-5' | 49765324 | 49765713 | 49765957 | 56653429 | 244 | 26 | 234 |
| 52 | 3'-5' | 50772593 | 50772641 | 50773226 | 57660698 | 585 | 12 | 575 |
| 53 | 3'-5' | 51167568 | 51167769 | 51168201 | 58055673 | 432 | 13 | 422 |
| 54 | 3'-5' | 53614645 | 53614924 | 53615278 | 60502750 | 354 | 32 | 344 |
| 55 | 3'-5' | 53710545 | 53710808 | 53711178 | 60598650 | 370 | 6  | 360 |
| 56 | 3'-5' | 53949138 | 53949349 | 53949771 | 60837243 | 422 | 27 | 412 |

X

NT\_039699.7 (1)

|   |       |         |         |         |         |     |    |     |
|---|-------|---------|---------|---------|---------|-----|----|-----|
| 0 | 5'-3' | 1677869 | 1677869 | 1678248 | 4677869 | 379 | 22 | 369 |
| 1 | 5'-3' | 1823491 | 1823491 | 1823872 | 4823491 | 381 | 22 | 371 |
| 2 | 3'-5' | 158649  | 158901  | 159282  | 3158649 | 381 | 22 | 371 |
| 3 | 3'-5' | 3016343 | 3016711 | 3016976 | 6016343 | 265 | 19 | 255 |
| 4 | 3'-5' | 3042014 | 3042280 | 3042647 | 6042014 | 367 | 15 | 357 |

NT\_039700.7 (2)

|    |       |          |          |          |          |     |    |     |
|----|-------|----------|----------|----------|----------|-----|----|-----|
| 5  | 5'-3' | 5117018  | 5117018  | 5117364  | 11526112 | 346 | 25 | 336 |
| 6  | 5'-3' | 6013899  | 6013899  | 6014443  | 12422993 | 544 | 20 | 534 |
| 7  | 5'-3' | 11443344 | 11443344 | 11443703 | 17852438 | 359 | 9  | 349 |
| 8  | 3'-5' | 2617313  | 2617581  | 2617946  | 9026407  | 365 | 26 | 355 |
| 9  | 3'-5' | 3858249  | 3858479  | 3858882  | 10267343 | 403 | 15 | 393 |
| 10 | 3'-5' | 4289675  | 4289800  | 4290308  | 10698769 | 508 | 6  | 498 |
| 11 | 3'-5' | 6074868  | 6075074  | 6075501  | 12483962 | 427 | 14 | 417 |
| 12 | 3'-5' | 6319309  | 6319544  | 6319942  | 12728403 | 398 | 19 | 388 |
| 13 | 3'-5' | 8391359  | 8391614  | 8391992  | 14800453 | 378 | 15 | 368 |
| 14 | 3'-5' | 9724044  | 9724244  | 9724677  | 16133138 | 433 | 30 | 423 |
| 15 | 3'-5' | 11391843 | 11392102 | 11392476 | 17800937 | 374 | 29 | 364 |
| 16 | 3'-5' | 12721576 | 12721981 | 12722209 | 19130670 | 228 | 14 | 218 |
| 17 | 3'-5' | 14684810 | 14685139 | 14685443 | 21093904 | 304 | 27 | 294 |



|    |       |                  |          |          |          |     |    |     |
|----|-------|------------------|----------|----------|----------|-----|----|-----|
|    |       | NT_111909.2 (11) |          |          |          |     |    |     |
| 18 | 5'-3' | 1928244          | 1928244  | 1928620  | 34232725 | 376 | 12 | 366 |
|    |       | NT_039702.5 (12) |          |          |          |     |    |     |
| 19 | 5'-3' | 1113985          | 1113985  | 1114318  | 36281826 | 333 | 6  | 323 |
| 20 | 5'-3' | 3186849          | 3186849  | 3187163  | 38354690 | 314 | 17 | 304 |
| 21 | 5'-3' | 4099556          | 4099556  | 4099862  | 39267397 | 306 | 22 | 296 |
| 22 | 5'-3' | 4217898          | 4217898  | 4218299  | 39385739 | 401 | 7  | 391 |
| 23 | 5'-3' | 6411738          | 6411738  | 6412120  | 41579579 | 382 | 21 | 372 |
| 24 | 5'-3' | 9052208          | 9052208  | 9052529  | 44220049 | 321 | 11 | 311 |
| 25 | 5'-3' | 13416039         | 13416039 | 13416514 | 48583880 | 475 | 17 | 465 |
| 26 | 5'-3' | 13903071         | 13903071 | 13903434 | 49070912 | 363 | 19 | 353 |
| 27 | 5'-3' | 14515738         | 14515738 | 14516172 | 49683579 | 434 | 29 | 424 |
| 28 | 3'-5' | 3742306          | 3742507  | 3742939  | 38910147 | 432 | 28 | 422 |
| 29 | 3'-5' | 5114946          | 5115281  | 5115579  | 40282787 | 298 | 19 | 288 |
| 30 | 3'-5' | 5214399          | 5214720  | 5215032  | 40382240 | 312 | 21 | 302 |
| 31 | 3'-5' | 5470135          | 5470381  | 5470768  | 40637976 | 387 | 11 | 377 |
| 32 | 3'-5' | 5784923          | 5785160  | 5785556  | 40952764 | 396 | 9  | 386 |
| 33 | 3'-5' | 7725509          | 7725768  | 7726142  | 42893350 | 374 | 12 | 364 |
| 34 | 3'-5' | 7938034          | 7938249  | 7938667  | 43105875 | 418 | 27 | 408 |
| 35 | 3'-5' | 10525242         | 10525362 | 10525875 | 45693083 | 513 | 23 | 503 |
| 36 | 3'-5' | 13050177         | 13050446 | 13050810 | 48218018 | 364 | 9  | 354 |
| 37 | 3'-5' | 13543780         | 13544040 | 13544413 | 48711621 | 373 | 25 | 363 |
| 38 | 3'-5' | 14650095         | 14650383 | 14650728 | 49817936 | 345 | 23 | 335 |
|    |       | NT_039706.7 (15) |          |          |          |     |    |     |
| 39 | 5'-3' | 999216           | 999216   | 999618   | 53415109 | 402 | 20 | 392 |
| 40 | 5'-3' | 1453798          | 1453798  | 1454188  | 53869691 | 390 | 27 | 380 |
| 41 | 5'-3' | 3796377          | 3796377  | 3796739  | 56212270 | 362 | 29 | 352 |
| 42 | 5'-3' | 5625380          | 5625380  | 5625790  | 58041273 | 410 | 15 | 400 |
| 43 | 5'-3' | 6469565          | 6469565  | 6469772  | 58885458 | 207 | 13 | 197 |
| 44 | 5'-3' | 8316918          | 8316918  | 8317281  | 60732811 | 363 | 7  | 353 |
| 45 | 5'-3' | 13482256         | 13482256 | 13482738 | 65898149 | 482 | 8  | 472 |
| 46 | 5'-3' | 17267034         | 17267034 | 17267398 | 69682927 | 364 | 30 | 354 |
| 47 | 5'-3' | 20248862         | 20248862 | 20249236 | 72664755 | 374 | 12 | 364 |
| 48 | 5'-3' | 20360479         | 20360479 | 20360887 | 72776372 | 408 | 8  | 398 |
| 49 | 5'-3' | 22189567         | 22189567 | 22189952 | 74605460 | 385 | 25 | 375 |

|    |       |          |          |          |           |     |    |     |
|----|-------|----------|----------|----------|-----------|-----|----|-----|
| 50 | 5'-3' | 23794193 | 23794193 | 23794539 | 76210086  | 346 | 20 | 336 |
| 51 | 5'-3' | 24250399 | 24250399 | 24250723 | 76666292  | 324 | 22 | 314 |
| 52 | 5'-3' | 26453296 | 26453296 | 26453696 | 78869189  | 400 | 21 | 390 |
| 53 | 5'-3' | 28684474 | 28684474 | 28684873 | 81100367  | 399 | 24 | 389 |
| 54 | 5'-3' | 31471262 | 31471262 | 31471462 | 83887155  | 200 | 9  | 190 |
| 55 | 5'-3' | 32489065 | 32489065 | 32489357 | 84904958  | 292 | 9  | 282 |
| 56 | 5'-3' | 37690085 | 37690085 | 37690330 | 90105978  | 245 | 30 | 235 |
| 57 | 5'-3' | 38234249 | 38234249 | 38234613 | 90650142  | 364 | 25 | 354 |
| 58 | 5'-3' | 38940410 | 38940410 | 38940792 | 91356303  | 382 | 28 | 372 |
| 59 | 5'-3' | 39025620 | 39025620 | 39026090 | 91441513  | 470 | 31 | 460 |
| 60 | 5'-3' | 47439566 | 47439566 | 47440076 | 99855459  | 510 | 23 | 500 |
| 61 | 5'-3' | 52930917 | 52930917 | 52931338 | 105346810 | 421 | 6  | 411 |
| 62 | 5'-3' | 53842489 | 53842489 | 53842871 | 106258382 | 382 | 31 | 372 |
| 63 | 3'-5' | 1079421  | 1079651  | 1080054  | 53495314  | 403 | 20 | 393 |
| 64 | 3'-5' | 1778100  | 1778375  | 1778733  | 54193993  | 358 | 9  | 348 |
| 65 | 3'-5' | 2320548  | 2320627  | 2321181  | 54736441  | 554 | 8  | 544 |
| 66 | 3'-5' | 3514474  | 3514690  | 3515107  | 55930367  | 417 | 31 | 407 |
| 67 | 3'-5' | 3811521  | 3811902  | 3812154  | 56227414  | 252 | 20 | 242 |
| 68 | 3'-5' | 4014327  | 4014793  | 4014960  | 56430220  | 167 | 25 | 157 |
| 69 | 3'-5' | 5077440  | 5077718  | 5078073  | 57493333  | 355 | 29 | 345 |
| 70 | 3'-5' | 6786081  | 6786349  | 6786714  | 59201974  | 365 | 17 | 355 |
| 71 | 3'-5' | 9039865  | 9040108  | 9040498  | 61455758  | 390 | 14 | 380 |
| 72 | 3'-5' | 12649725 | 12650112 | 12650358 | 65065618  | 246 | 28 | 236 |
| 73 | 3'-5' | 16053531 | 16053691 | 16054164 | 68469424  | 473 | 13 | 463 |
| 74 | 3'-5' | 19885652 | 19885878 | 19886285 | 72301545  | 407 | 24 | 397 |
| 75 | 3'-5' | 20274446 | 20274509 | 20275079 | 72690339  | 570 | 22 | 560 |
| 76 | 3'-5' | 20303759 | 20303940 | 20304392 | 72719652  | 452 | 22 | 442 |
| 77 | 3'-5' | 20930476 | 20930703 | 20931109 | 73346369  | 406 | 10 | 396 |
| 78 | 3'-5' | 22789265 | 22789446 | 22789898 | 75205158  | 452 | 22 | 442 |
| 79 | 3'-5' | 25401956 | 25402238 | 25402589 | 77817849  | 351 | 12 | 341 |
| 80 | 3'-5' | 26225498 | 26225936 | 26226131 | 78641391  | 195 | 25 | 185 |
| 81 | 3'-5' | 27634585 | 27634837 | 27635218 | 80050478  | 381 | 19 | 371 |
| 82 | 3'-5' | 28063270 | 28063696 | 28063903 | 80479163  | 207 | 17 | 197 |
| 83 | 3'-5' | 28867448 | 28867721 | 28868081 | 81283341  | 360 | 15 | 350 |
| 84 | 3'-5' | 29303402 | 29303573 | 29304035 | 81719295  | 462 | 15 | 452 |
| 85 | 3'-5' | 30534082 | 30534345 | 30534715 | 82949975  | 370 | 7  | 360 |
| 86 | 3'-5' | 30774574 | 30774692 | 30775207 | 83190467  | 515 | 8  | 505 |

|     |       |          |          |          |           |     |    |     |
|-----|-------|----------|----------|----------|-----------|-----|----|-----|
| 87  | 3'-5' | 31924276 | 31924525 | 31924909 | 84340169  | 384 | 12 | 374 |
| 88  | 3'-5' | 32045082 | 32045346 | 32045715 | 84460975  | 369 | 24 | 359 |
| 89  | 3'-5' | 32250067 | 32250251 | 32250700 | 84665960  | 449 | 23 | 439 |
| 90  | 3'-5' | 32331523 | 32331744 | 32332156 | 84747416  | 412 | 18 | 402 |
| 91  | 3'-5' | 34302861 | 34302936 | 34303494 | 86718754  | 558 | 32 | 548 |
| 92  | 3'-5' | 36082651 | 36082903 | 36083284 | 88498544  | 381 | 14 | 371 |
| 93  | 3'-5' | 37804520 | 37804824 | 37805153 | 90220413  | 329 | 25 | 319 |
| 94  | 3'-5' | 37863630 | 37863892 | 37864263 | 90279523  | 371 | 25 | 361 |
| 95  | 3'-5' | 38212696 | 38212953 | 38213329 | 90628589  | 376 | 25 | 366 |
| 96  | 3'-5' | 38654616 | 38654838 | 38655249 | 91070509  | 411 | 24 | 401 |
| 97  | 3'-5' | 41215588 | 41215838 | 41216221 | 93631481  | 383 | 21 | 373 |
| 98  | 3'-5' | 41713036 | 41713291 | 41713669 | 94128929  | 378 | 15 | 368 |
| 99  | 3'-5' | 42624280 | 42624524 | 42624913 | 95040173  | 389 | 26 | 379 |
| 100 | 3'-5' | 45979482 | 45979739 | 45980115 | 98395375  | 376 | 25 | 366 |
| 101 | 3'-5' | 48058918 | 48059143 | 48059551 | 100474811 | 408 | 32 | 398 |

NT\_039713.7 (16)

|     |       |          |          |          |           |     |    |     |
|-----|-------|----------|----------|----------|-----------|-----|----|-----|
| 102 | 5'-3' | 2335333  | 2335333  | 2335796  | 110805240 | 463 | 21 | 453 |
| 103 | 5'-3' | 5967200  | 5967200  | 5967560  | 114437107 | 360 | 26 | 350 |
| 104 | 5'-3' | 6533811  | 6533811  | 6534153  | 115003718 | 342 | 12 | 332 |
| 105 | 5'-3' | 7755274  | 7755274  | 7755699  | 116225181 | 425 | 18 | 415 |
| 106 | 5'-3' | 10354647 | 10354647 | 10355089 | 118824554 | 442 | 25 | 432 |
| 107 | 3'-5' | 661852   | 662231   | 662485   | 109131759 | 254 | 18 | 244 |
| 108 | 3'-5' | 1064322  | 1064609  | 1064955  | 109534229 | 346 | 6  | 336 |
| 109 | 3'-5' | 1194910  | 1195256  | 1195543  | 109664817 | 287 | 18 | 277 |
| 110 | 3'-5' | 1717332  | 1717600  | 1717965  | 110187239 | 365 | 23 | 355 |
| 111 | 3'-5' | 4156966  | 4157231  | 4157599  | 112626873 | 368 | 34 | 358 |
| 112 | 3'-5' | 4884917  | 4885180  | 4885550  | 113354824 | 370 | 8  | 360 |
| 113 | 3'-5' | 5177134  | 5177355  | 5177767  | 113647041 | 412 | 13 | 402 |
| 114 | 3'-5' | 5862041  | 5862357  | 5862674  | 114331948 | 317 | 6  | 307 |
| 115 | 3'-5' | 6735714  | 6735987  | 6736347  | 115205621 | 360 | 28 | 350 |
| 116 | 3'-5' | 9638846  | 9639118  | 9639479  | 118108753 | 361 | 18 | 351 |
| 117 | 3'-5' | 11337428 | 11337717 | 11338061 | 119807335 | 344 | 28 | 334 |
| 118 | 3'-5' | 11629511 | 11629916 | 11630144 | 120099418 | 228 | 27 | 218 |

NT\_039716.7 (18)

|     |       |         |         |         |           |     |   |     |
|-----|-------|---------|---------|---------|-----------|-----|---|-----|
| 119 | 5'-3' | 1192535 | 1192535 | 1192971 | 123628977 | 436 | 6 | 426 |
|-----|-------|---------|---------|---------|-----------|-----|---|-----|

|     |       |          |          |          |           |     |    |     |
|-----|-------|----------|----------|----------|-----------|-----|----|-----|
| 120 | 5'-3' | 3577297  | 3577297  | 3577726  | 126013739 | 429 | 19 | 419 |
| 121 | 5'-3' | 4317166  | 4317166  | 4317528  | 126753608 | 362 | 9  | 352 |
| 122 | 5'-3' | 4473577  | 4473577  | 4473984  | 126910019 | 407 | 23 | 397 |
| 123 | 5'-3' | 6163761  | 6163761  | 6164190  | 128600203 | 429 | 27 | 419 |
| 124 | 5'-3' | 6832765  | 6832765  | 6833344  | 129269207 | 579 | 18 | 569 |
| 125 | 5'-3' | 7114679  | 7114679  | 7114887  | 129551121 | 208 | 26 | 198 |
| 126 | 5'-3' | 9092786  | 9092786  | 9093090  | 131529228 | 304 | 31 | 294 |
| 127 | 5'-3' | 12118875 | 12118875 | 12119386 | 134555317 | 511 | 8  | 501 |
| 128 | 5'-3' | 13307034 | 13307034 | 13307407 | 135743476 | 373 | 22 | 363 |
| 129 | 5'-3' | 13312558 | 13312558 | 13312919 | 135749000 | 361 | 8  | 351 |
| 130 | 5'-3' | 14178068 | 14178068 | 14178256 | 136614510 | 188 | 13 | 178 |
| 131 | 3'-5' | 945204   | 945352   | 945837   | 123381646 | 485 | 20 | 475 |
| 132 | 3'-5' | 2458791  | 2458939  | 2459424  | 124895233 | 485 | 10 | 475 |
| 133 | 3'-5' | 2490204  | 2490448  | 2490837  | 124926646 | 389 | 22 | 379 |
| 134 | 3'-5' | 4492003  | 4492222  | 4492636  | 126928445 | 414 | 16 | 404 |
| 135 | 3'-5' | 4505011  | 4505280  | 4505644  | 126941453 | 364 | 15 | 354 |
| 136 | 3'-5' | 5678617  | 5678856  | 5679250  | 128115059 | 394 | 10 | 384 |
| 137 | 3'-5' | 8170923  | 8170968  | 8171556  | 130607365 | 588 | 17 | 578 |
| 138 | 3'-5' | 9171185  | 9171440  | 9171818  | 131607627 | 378 | 34 | 368 |
| 139 | 3'-5' | 10054367 | 10054539 | 10055000 | 132490809 | 461 | 19 | 451 |
| 140 | 3'-5' | 12449166 | 12449426 | 12449799 | 134885608 | 373 | 9  | 363 |
| 141 | 3'-5' | 13716011 | 13716300 | 13716644 | 136152453 | 344 | 33 | 334 |
| 142 | 3'-5' | 14076758 | 14076979 | 14077391 | 136513200 | 412 | 13 | 402 |
| 143 | 3'-5' | 14642454 | 14642703 | 14643087 | 137078896 | 384 | 16 | 374 |

NT\_039718.7 (19)

|     |       |         |         |         |           |     |    |     |
|-----|-------|---------|---------|---------|-----------|-----|----|-----|
| 144 | 5'-3' | 1189884 | 1189884 | 1190517 | 138773955 | 277 | 30 | 267 |
| 145 | 5'-3' | 2567326 | 2567326 | 2567959 | 140151397 | 446 | 27 | 436 |
| 146 | 5'-3' | 2759554 | 2759554 | 2760187 | 140343625 | 364 | 30 | 354 |
| 147 | 5'-3' | 3252779 | 3252779 | 3253412 | 140836850 | 180 | 25 | 170 |
| 148 | 5'-3' | 5536278 | 5536278 | 5536911 | 143120349 | 368 | 18 | 358 |
| 149 | 5'-3' | 5839358 | 5839358 | 5839991 | 143423429 | 353 | 17 | 343 |
| 150 | 5'-3' | 5958618 | 5958618 | 5959251 | 143542689 | 347 | 22 | 337 |
| 151 | 5'-3' | 6077435 | 6077435 | 6078068 | 143661506 | 284 | 17 | 274 |
| 152 | 5'-3' | 6319340 | 6319340 | 6319973 | 143903411 | 280 | 8  | 270 |
| 153 | 5'-3' | 9617063 | 9617063 | 9617696 | 147201134 | 461 | 24 | 451 |
| 154 | 5'-3' | 9633167 | 9633167 | 9633800 | 147217238 | 438 | 19 | 428 |

|     |       |          |          |          |           |     |    |     |
|-----|-------|----------|----------|----------|-----------|-----|----|-----|
| 155 | 5'-3' | 12614744 | 12614744 | 12615377 | 150198815 | 353 | 22 | 343 |
| 156 | 5'-3' | 16699204 | 16699204 | 16699837 | 154283275 | 424 | 31 | 414 |
| 157 | 5'-3' | 17713255 | 17713255 | 17713888 | 155297326 | 448 | 27 | 438 |
| 158 | 5'-3' | 19503517 | 19503517 | 19504150 | 157087588 | 168 | 15 | 158 |
| 159 | 5'-3' | 24898836 | 24898836 | 24899469 | 162482907 | 290 | 16 | 280 |
| 160 | 5'-3' | 26647592 | 26647592 | 26648225 | 164231663 | 483 | 31 | 473 |
| 161 | 5'-3' | 26746406 | 26746406 | 26747039 | 164330477 | 390 | 17 | 380 |
| 162 | 5'-3' | 27738874 | 27738874 | 27739507 | 165322945 | 420 | 27 | 410 |
| 163 | 5'-3' | 27940764 | 27940764 | 27941397 | 165524835 | 423 | 14 | 413 |
| 164 | 5'-3' | 28769017 | 28769017 | 28769650 | 166353088 | 421 | 11 | 411 |
| 165 | 3'-5' | 351340   | 351424   | 351973   | 137935411 | 549 | 9  | 539 |
| 166 | 3'-5' | 14226937 | 14227262 | 14227570 | 151811008 | 308 | 9  | 298 |
| 167 | 3'-5' | 15736780 | 15737088 | 15737413 | 153320851 | 325 | 16 | 315 |
| 168 | 3'-5' | 15938712 | 15938944 | 15939345 | 153522783 | 401 | 8  | 391 |
| 169 | 3'-5' | 20854488 | 20854647 | 20855121 | 158438559 | 474 | 18 | 464 |
| 170 | 3'-5' | 21678489 | 21678760 | 21679122 | 159262560 | 362 | 11 | 352 |
| 171 | 3'-5' | 21870242 | 21870427 | 21870875 | 159454313 | 448 | 26 | 438 |
| 172 | 3'-5' | 22194809 | 22195138 | 22195442 | 159778880 | 304 | 31 | 294 |
| 173 | 3'-5' | 23101466 | 23101913 | 23102099 | 160685537 | 186 | 12 | 176 |
| 174 | 3'-5' | 24466505 | 24466731 | 24467138 | 162050576 | 407 | 34 | 397 |
| 175 | 3'-5' | 26197615 | 26197924 | 26198248 | 163781686 | 324 | 27 | 314 |
| 176 | 3'-5' | 26998091 | 26998390 | 26998724 | 164582162 | 334 | 25 | 324 |
| 177 | 3'-5' | 27864573 | 27864779 | 27865206 | 165448644 | 427 | 22 | 417 |

Y

|   |       |                 |        |        |        |     |    |     |
|---|-------|-----------------|--------|--------|--------|-----|----|-----|
|   |       | NT_078925.6 (1) |        |        |        |     |    |     |
| 0 | 3'-5' | 243539          | 243860 | 244172 | 243539 | 312 | 34 | 302 |
| 1 | 3'-5' | 857240          | 857444 | 857873 | 857240 | 429 | 26 | 419 |
| 2 | 3'-5' | 937740          | 937944 | 938373 | 937740 | 429 | 26 | 419 |

**Supplemental Table S2:** Possible spatial correlation between protein-coding genes and pol III transcription units.

| chromosome | number of genes | numeber of items |
|------------|-----------------|------------------|
| 1          | 1819            | 190              |
| 2          | 2445            | 138              |
| 3          | 1579            | 80               |
| 4          | 1881            | 136              |
| 5          | 1773            | 99               |
| 6          | 1906            | 138              |
| 7          | 2908            | 141              |
| 8          | 1446            | 123              |
| 9          | 1640            | 88               |
| 10         | 1412            | 152              |
| 11         | 2094            | 98               |
| 12         | 1369            | 124              |
| 13         | 1401            | 80               |
| 14         | 1538            | 119              |
| 15         | 1091            | 107              |
| 16         | 973             | 101              |
| 17         | 1511            | 90               |
| 18         | 823             | 90               |
| 19         | 974             | 57               |
| X          | 1847            | 178              |
| Y          | 53              | 4                |
| total      | 32483           | 2333             |

**Supplemental Table S3:** subchromosomal localization of pol III type 3 putative transcription units in mouse chromosomes

| chromosome | Number of items | Number of items in genes | % items in genes |
|------------|-----------------|--------------------------|------------------|
| 1          | 190             | 66                       | 34,74            |
| 2          | 138             | 43                       | 31,16            |
| 3          | 80              | 22                       | 27,50            |
| 4          | 136             | 30                       | 22,06            |
| 5          | 99              | 33                       | 33,33            |
| 6          | 138             | 43                       | 31,16            |
| 7          | 141             | 50                       | 35,46            |
| 8          | 123             | 25                       | 20,33            |
| 9          | 88              | 40                       | 45,45            |
| 10         | 152             | 36                       | 23,68            |
| 11         | 98              | 25                       | 25,51            |
| 12         | 124             | 24                       | 19,35            |
| 13         | 80              | 23                       | 28,75            |
| 14         | 119             | 38                       | 31,93            |
| 15         | 107             | 38                       | 35,51            |
| 16         | 101             | 33                       | 32,67            |
| 17         | 90              | 30                       | 33,33            |
| 18         | 90              | 18                       | 20,00            |
| 19         | 57              | 23                       | 40,35            |
| X          | 178             | 62                       | 34,83            |
| Y          | 4               | 0                        | 0,00             |
| total      | 2333            | 702                      | 28,91            |

**Supplemental Table S4: analysis of genes/chromosome length**

| chr   | chr.length (bp) | exons  | avg exon (bp) | exons (bp) | introns | avg intron (bp) | introns (bp) | genes (bp) | genes/chr length |
|-------|-----------------|--------|---------------|------------|---------|-----------------|--------------|------------|------------------|
| 1     | 197195432       | 13351  | 284           | 3791684    | 11952   | 5476            | 65449152     | 69240836   | 0,35             |
| 2     | 181748087       | 16959  | 294           | 4985946    | 15015   | 4369            | 65600535     | 70586481   | 0,39             |
| 3     | 159599783       | 9530   | 299           | 2849470    | 8393    | 5238            | 43962534     | 46812004   | 0,29             |
| 4     | 155630120       | 12272  | 290           | 3558880    | 10807   | 4420            | 47766940     | 51325820   | 0,33             |
| 5     | 152537259       | 13795  | 278           | 3835010    | 12315   | 4459            | 54912585     | 58747595   | 0,39             |
| 6     | 149517037       | 10730  | 286           | 3068780    | 9347    | 5741            | 53661127     | 56729907   | 0,38             |
| 7     | 152524553       | 15995  | 302           | 4830490    | 13733   | 3578            | 49136674     | 53967164   | 0,35             |
| 8     | 131738871       | 10285  | 279           | 2869515    | 9123    | 4576            | 41746848     | 44616363   | 0,34             |
| 9     | 124076172       | 11796  | 282           | 3326472    | 10502   | 4370            | 45893740     | 49220212   | 0,40             |
| 10    | 129993255       | 9682   | 289           | 2798098    | 8555    | 5368            | 45923240     | 48721338   | 0,37             |
| 11    | 121843856       | 15849  | 275           | 4358475    | 14111   | 3237            | 45677307     | 50035782   | 0,41             |
| 12    | 121257530       | 7220   | 296           | 2137120    | 6309    | 5734            | 36175806     | 38312926   | 0,32             |
| 13    | 120284312       | 7311   | 306           | 2237166    | 6311    | 5963            | 37632493     | 39869659   | 0,33             |
| 14    | 125194864       | 8024   | 286           | 2294864    | 7021    | 6035            | 42371735     | 44666599   | 0,36             |
| 15    | 103494974       | 8396   | 279           | 2342484    | 7525    | 4611            | 34697775     | 37040259   | 0,36             |
| 16    | 98319150        | 6350   | 297           | 1885950    | 5573    | 5719            | 31871987     | 33757937   | 0,34             |
| 17    | 95272651        | 9867   | 271           | 2673957    | 8691    | 3687            | 32043717     | 34717674   | 0,36             |
| 18    | 90772031        | 5069   | 344           | 1743736    | 4468    | 7265            | 32460020     | 34203756   | 0,38             |
| 19    | 61424300        | 7060   | 270           | 1906200    | 6260    | 3989            | 24971140     | 26877340   | 0,44             |
| X     | 166650296       | 7949   | 312           | 2480088    | 6705    | 5846            | 39197430     | 41677518   | 0,25             |
| Y     | 15902555        | 442    | 242           | 106964     | 356     | 3395            | 1208620      | 1315584    | 0,08             |
| total | 2654977088      | 207932 |               | 60081349   | 183072  |                 | 872361405    | 932442754  |                  |



**Supplemental Table S5:** chi square test analysis of the correlation between single polIII transcription units and their correspondent protein-coding host genes

| chromosome | OBSERVED |                    | EXPECTED |                    | chi-square  |
|------------|----------|--------------------|----------|--------------------|-------------|
|            | cogenes  | items non in genes | cogenes  | items non in genes |             |
| 1          | 66       | 124                | 66,71    | 123,29             | 0,914       |
| 2          | 43       | 95                 | 53,60    | 84,40              | 0,064       |
| 3          | 22       | 58                 | 23,46    | 56,54              | 0,719       |
| 4          | 30       | 106                | 44,85    | 91,15              | 0,007       |
| 5          | 33       | 66                 | 38,13    | 60,87              | 0,290       |
| 6          | 43       | 95                 | 52,36    | 85,64              | 0,101       |
| 7          | 50       | 91                 | 49,89    | 91,11              | 0,984       |
| 8          | 25       | 98                 | 41,66    | 81,34              | 0,002       |
| 9          | 40       | 48                 | 34,91    | 53,09              | 0,267       |
| 10         | 36       | 116                | 56,97    | 95,03              | 0,000       |
| 11         | 25       | 73                 | 40,24    | 57,76              | 0,002       |
| 12         | 24       | 100                | 39,18    | 84,82              | 0,003       |
| 13         | 23       | 57                 | 26,52    | 53,48              | 0,404       |
| 14         | 38       | 81                 | 42,46    | 76,54              | 0,394       |
| 15         | 38       | 69                 | 38,29    | 68,71              | 0,953       |
| 16         | 33       | 68                 | 34,68    | 66,32              | 0,725       |
| 17         | 30       | 60                 | 32,80    | 57,20              | 0,540       |
| 18         | 18       | 72                 | 33,91    | 56,09              | 0,001       |
| 19         | 23       | 34                 | 24,94    | 32,06              | 0,604       |
| X          | 62       | 116                | 44,52    | 133,48             | 0,002       |
| Y          | 0        | 4                  | 0,33     | 3,67               | 0,548       |
| total      | 702      | 1631               | 819,36   | 1513,64            | 3,57614E-07 |

**Supplemental Table S5:** chi square test analysis of the correlation between single polIII transcription units and their correspondent protein-coding host genes

| chromosome | OBSERVED |                    | EXPECTED |                    | chi-square  |
|------------|----------|--------------------|----------|--------------------|-------------|
|            | cogenes  | items non in genes | cogenes  | items non in genes |             |
| 1          | 66       | 124                | 66,71    | 123,29             | 0,914       |
| 2          | 43       | 95                 | 53,60    | 84,40              | 0,064       |
| 3          | 22       | 58                 | 23,46    | 56,54              | 0,719       |
| 4          | 30       | 106                | 44,85    | 91,15              | 0,007       |
| 5          | 33       | 66                 | 38,13    | 60,87              | 0,290       |
| 6          | 43       | 95                 | 52,36    | 85,64              | 0,101       |
| 7          | 50       | 91                 | 49,89    | 91,11              | 0,984       |
| 8          | 25       | 98                 | 41,66    | 81,34              | 0,002       |
| 9          | 40       | 48                 | 34,91    | 53,09              | 0,267       |
| 10         | 36       | 116                | 56,97    | 95,03              | 0,000       |
| 11         | 25       | 73                 | 40,24    | 57,76              | 0,002       |
| 12         | 24       | 100                | 39,18    | 84,82              | 0,003       |
| 13         | 23       | 57                 | 26,52    | 53,48              | 0,404       |
| 14         | 38       | 81                 | 42,46    | 76,54              | 0,394       |
| 15         | 38       | 69                 | 38,29    | 68,71              | 0,953       |
| 16         | 33       | 68                 | 34,68    | 66,32              | 0,725       |
| 17         | 30       | 60                 | 32,80    | 57,20              | 0,540       |
| 18         | 18       | 72                 | 33,91    | 56,09              | 0,001       |
| 19         | 23       | 34                 | 24,94    | 32,06              | 0,604       |
| X          | 62       | 116                | 44,52    | 133,48             | 0,002       |
| Y          | 0        | 4                  | 0,33     | 3,67               | 0,548       |
| total      | 702      | 1631               | 819,36   | 1513,64            | 3,57614E-07 |

**Supplemental Table S6:** fraction of intronic and exonic pol III transcription units in single chromosomes

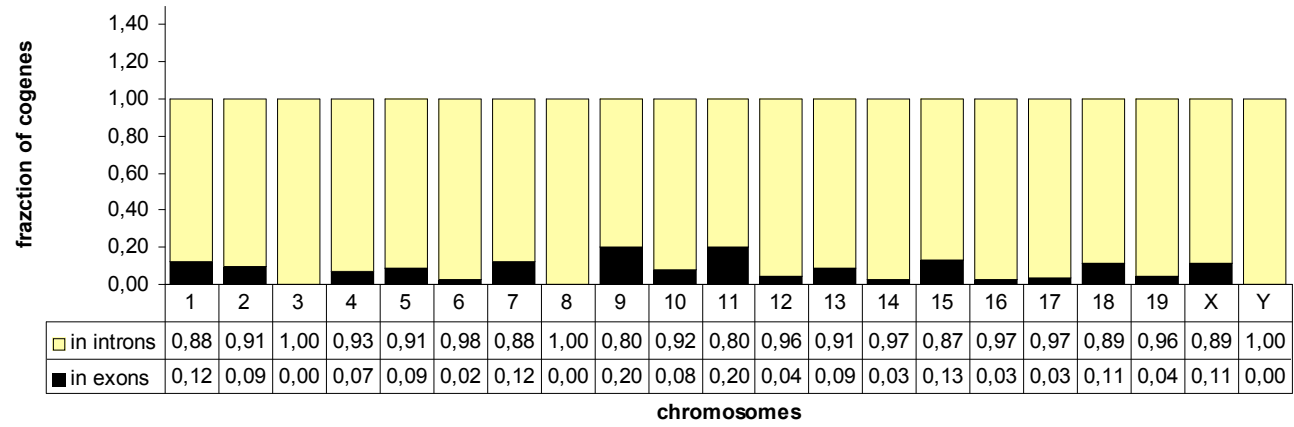

**Supplemental Table S7:** chi square test analysis of the correlation between th novel single polIII transcription units and introns

| chromosome | OBSERVED |            | EXPECTED |            | chi-square |
|------------|----------|------------|----------|------------|------------|
|            | in exons | in introns | in exons | in introns |            |
| 1          | 8        | 58         | 3,61     | 62,39      | 0,0177     |
| 2          | 4        | 39         | 3,04     | 39,96      | 0,5667     |
| 3          | 0        | 22         | 1,34     | 20,66      | 0,2324     |
| 4          | 2        | 28         | 2,08     | 27,92      | 0,9541     |
| 5          | 3        | 30         | 2,15     | 30,85      | 0,5512     |
| 6          | 1        | 42         | 2,33     | 40,67      | 0,3713     |
| 7          | 6        | 44         | 4,48     | 45,52      | 0,4501     |
| 8          | 0        | 25         | 1,61     | 23,39      | 0,1899     |
| 9          | 8        | 32         | 2,70     | 37,30      | 0,0008     |
| 10         | 3        | 33         | 2,07     | 33,93      | 0,5041     |
| 11         | 5        | 20         | 2,18     | 22,82      | 0,0453     |
| 12         | 1        | 23         | 1,34     | 22,66      | 0,7632     |
| 13         | 2        | 21         | 1,29     | 21,71      | 0,5204     |
| 14         | 1        | 37         | 1,95     | 36,05      | 0,4841     |
| 15         | 5        | 33         | 2,40     | 35,60      | 0,0835     |
| 16         | 1        | 32         | 1,84     | 31,16      | 0,5225     |
| 17         | 1        | 29         | 2,31     | 27,69      | 0,3695     |
| 18         | 2        | 16         | 0,92     | 17,08      | 0,2461     |
| 19         | 1        | 22         | 1,63     | 21,37      | 0,6081     |
| X          | 7        | 55         | 3,69     | 58,31      | 0,0755     |
| Y          | 0        | 0          | 0,00     | 0,00       |            |
| total      | 61       | 641        | 45,23    | 656,77     | 0,0154     |

| CHR | Tr. Unit | gene                                                                          | gene ID                  | intr/ex | position in chromosome | Length | TATA distance | poly-T distance |
|-----|----------|-------------------------------------------------------------------------------|--------------------------|---------|------------------------|--------|---------------|-----------------|
| 1   | 1        | <a href="#">regulator of G-protein signaling 20</a>                           | <a href="#">Rgs20</a>    | I       | 4.994.160              | 337    | 6             | 327             |
| 1   | 2        | <a href="#">hypothetical protein LOC320492</a>                                |                          | I       | 11.682.780             | 263    | 16            | 253             |
| 1   | 3        | <a href="#">hypothetical protein LOC320492</a>                                |                          | I       | 11.745.619             | 377    | 13            | 367             |
| 1   | 4        | <a href="#">potassium voltage-gated channel, subfamily Q, member 5</a>        | <a href="#">Kcnq5</a>    | I       | 21.841.135             | 362    | 26            | 352             |
| 1   | 5        | <a href="#">hypothetical protein LOC76982</a>                                 |                          | I       | 9.596.021              | 491    | 8             | 481             |
| 1   | 6        | <a href="#">centrosome and spindle pole associated protein 1</a>              | <a href="#">Cspp1</a>    | I       | 10.061.605             | 415    | 6             | 405             |
| 1   | 7        | <a href="#">centrosome and spindle pole associated protein 1</a>              | <a href="#">Cspp1</a>    | I       | 10.105.421             | 588    | 21            | 578             |
| 1   | 8        | <a href="#">polyductin</a>                                                    | <a href="#">Pkhd1</a>    | I       | 20.101.314             | 491    | 30            | 481             |
| 1   | 9        | <a href="#">liver regeneration p-53 related protein</a>                       |                          | I       | 24.794.644             | 409    | 20            | 399             |
| 1   | 10       | <a href="#">similar to AF4/FMR2 family member 3 (Protein LAF-4) (Lymph...</a> |                          | I       | 38.325.597             | 137    | 20            | 127             |
| 1   | 11       | <a href="#">solute carrier family 39 (zinc transporter), member 10</a>        | <a href="#">Slc39a10</a> | E       | 46.892.767             | 390    | 18            | 380             |
| 1   | 12       | <a href="#">transmembrane protein with EGF-like and two follistatin-l...</a>  | <a href="#">Tmeff1</a>   | I       | 51.231.495             | 325    | 7             | 315             |
| 1   | 13       | <a href="#">GPI deacylase</a>                                                 | <a href="#">Pgap</a>     | I       | 54.568.849             | 393    | 12            | 383             |
| 1   | 14       | <a href="#">aldehyde oxidase 3-like 1</a>                                     | <a href="#">Aox3l1</a>   | I       | 58.339.268             | 216    | 8             | 206             |
| 1   | 15       | <a href="#">amyotrophic lateral sclerosis 2 (juvenile) chromosome reg...</a>  | <a href="#">Als2cr19</a> | I       | 59.375.703             | 416    | 28            | 406             |
| 1   | 16       | <a href="#">v-erb-a erythroblastic leukemia viral oncogene homolog 4 ...</a>  | <a href="#">ErbB4</a>    | I       | 68.776.308             | 245    | 17            | 235             |
|     |          | <a href="#">v-erb-a erythroblastic leukemia viral oncogene homolog 4 ...</a>  | <a href="#">ErbB4</a>    | I       |                        |        |               |                 |
| 1   | 17       | <a href="#">v-erb-a erythroblastic leukemia viral oncogene homolog 4 ...</a>  | <a href="#">ErbB4</a>    | I       | 69.023.571             | 372    | 28            | 362             |
|     |          | <a href="#">v-erb-a erythroblastic leukemia viral oncogene homolog 4 ...</a>  | <a href="#">ErbB4</a>    | I       |                        |        |               |                 |
| 1   | 18       | <a href="#">sperm associated antigen 16 isoform 1</a>                         | <a href="#">Spag16</a>   | I       | 70.608.903             | 352    | 16            | 342             |
|     |          | <a href="#">sperm associated antigen 16 isoform 2</a>                         | <a href="#">Spag16</a>   | I       |                        |        |               |                 |
| 1   | 19       | <a href="#">nonhomologous end-joining factor 1</a>                            | <a href="#">Nhej1</a>    | I       | 75.084.377             | 533    | 25            | 523             |
| 1   | 20       | <a href="#">brain-specific angiogenesis inhibitor 3</a>                       | <a href="#">Bai3</a>     | E       | 25.452.974             | 435    | 7             | 425             |
| 1   | 21       | <a href="#">brain-specific angiogenesis inhibitor 3</a>                       | <a href="#">Bai3</a>     | I       | 25.489.776             | 387    | 13            | 377             |
| 1   | 22       | <a href="#">hypothetical protein LOC213056</a>                                |                          | I       | 58.587.398             | 582    | 20            | 572             |
| 1   | 23       | <a href="#">v-erb-a erythroblastic leukemia viral oncogene homolog 4 ...</a>  | <a href="#">ErbB4</a>    | I       | 69.028.557             | 395    | 30            | 385             |
|     |          | <a href="#">v-erb-a erythroblastic leukemia viral oncogene homolog 4 ...</a>  | <a href="#">ErbB4</a>    | I       |                        |        |               |                 |
| 1   | 24       | <a href="#">dedicator of cytokinesis 10 isoform 2</a>                         | <a href="#">Dock10</a>   | I       | 80.555.966             | 329    | 18            | 319             |
| 1   | 25       | <a href="#">hypothetical protein LOC241134</a>                                |                          | E       | 81.083.497             | 404    | 23            | 394             |
| 1   | 26       | <a href="#">sphingosine kinase type 1-interacting protein</a>                 | <a href="#">Sphkap</a>   | I       | 83.289.342             | 335    | 25            | 325             |
| 1   | 27       | <a href="#">Pid1 phosphotyrosine interaction domain containing 1</a>          | <a href="#">Pid1</a>     | I       | 84.087.449             | 165    | 17            | 155             |
| 1   | 28       | <a href="#">hypothetical protein</a>                                          |                          | E       | 99.139.804             | 354    | 17            | 344             |
| 1   | 29       | <a href="#">hypothetical protein LOC227446</a>                                |                          | E       | 107.622.734            | 423    | 16            | 413             |
| 1   | 30       | <a href="#">Yeast Sps1/Ste20-related kinase 4</a>                             | <a href="#">Ysk4</a>     | I       | 129.745.924            | 215    | 26            | 205             |

|   |    |                                                                               |                                 |   |             |     |    |     |
|---|----|-------------------------------------------------------------------------------|---------------------------------|---|-------------|-----|----|-----|
| 1 | 31 | <a href="#">thrombospondin, type I, domain containing 7B</a>                  | <a href="#">Thsd7b</a>          | I | 131.504.896 | 377 | 16 | 367 |
| 1 | 32 | <a href="#">thrombospondin, type I, domain containing 7B</a>                  | <a href="#">Thsd7b</a>          | I | 131.687.824 | 399 | 17 | 389 |
| 1 | 33 | <a href="#">Fam72a family with sequence similarity 72, member A</a>           | <a href="#">Fam72a</a>          | I | 133.434.714 | 300 | 16 | 290 |
| 1 | 34 | <a href="#">DBCCR1-like</a>                                                   | <a href="#">DBCCR1-like (Fz</a> | I | 148.562.696 | 386 | 24 | 376 |
| 1 | 35 | <a href="#">_ral guanine nucleotide dissociation stimulator-like 1</a>        | <a href="#">Rgl1</a>            | I | 154.468.463 | 285 | 6  | 275 |
| 1 | 36 | <a href="#">armadillo repeat containing 9 isoform 1</a>                       | <a href="#">Armc9</a>           | I | 88.150.689  | 382 | 17 | 372 |
| 1 | 37 | <a href="#">COP9 (constitutive photomorphogenic) homolog, subunit 7b</a>      | <a href="#">Cops7b</a>          | I | 88.493.445  | 375 | 24 | 365 |
| 1 | 38 | <a href="#">secreted nidogen domain protein</a>                               | <a href="#">Sned1</a>           | I | 95.175.069  | 379 | 33 | 369 |
| 1 | 39 | <a href="#">histidine acid phosphatase domain containing 1</a>                | <a href="#">Ppip5K1</a>         | I | 99.618.530  | 290 | 14 | 280 |
| 1 | 40 | <a href="#">contactin associated protein-like 5</a>                           | <a href="#">Cntnap5a</a>        | I | 102.352.425 | 386 | 34 | 376 |
| 1 | 41 | <a href="#">_contactin associated protein-like 5A</a>                         | <a href="#">Cntnap5a</a>        | I | 118.410.453 | 333 | 6  | 323 |
| 1 | 42 | <a href="#">dipeptidyl peptidase 10</a>                                       | <a href="#">Dpp10</a>           | I | 125.635.862 | 160 | 24 | 150 |
| 1 | 43 | <a href="#">dipeptidyl peptidase 10</a>                                       | <a href="#">Dpp10</a>           | I | 125.873.211 | 542 | 6  | 532 |
| 1 | 44 | <a href="#">thrombospondin, type I, domain containing 7B</a>                  | <a href="#">Thsd7b</a>          | I | 131.461.383 | 397 | 21 | 387 |
| 1 | 45 | <a href="#">DBCCR1-like</a>                                                   | <a href="#">DBCCR1-like</a>     | I | 148.385.966 | 259 | 21 | 249 |
| 1 | 46 | <a href="#">hypothetical protein LOC545370</a>                                |                                 | I | 152.828.556 | 340 | 19 | 330 |
| 1 | 47 | <a href="#">RIKEN cDNA 1700025G04</a>                                         |                                 | I | 153.756.996 | 524 | 18 | 514 |
| 1 | 48 | <a href="#">astrotactin 1</a>                                                 | <a href="#">Astn1</a>           | I | 160.567.364 | 322 | 22 | 312 |
| 1 | 49 | <a href="#">pappalysin 2</a>                                                  | <a href="#">Pappa2</a>          | I | 160.875.378 | 369 | 30 | 359 |
| 1 | 50 | <a href="#">kelch-like 20</a>                                                 | <a href="#">Klhl20</a>          | I | 163.024.762 | 322 | 8  | 312 |
| 1 | 51 | <a href="#">_succinate dehydrogenase complex, subunit C, integral memb...</a> | <a href="#">Sdhc</a>            | I | 173.062.910 | 308 | 31 | 298 |
| 1 | 52 | <a href="#">CD84 antigen</a>                                                  | <a href="#">CD84</a>            | E | 173.782.101 | 380 | 10 | 370 |
| 1 | 53 | <a href="#">Fc receptor, IgE, high affinity I, alpha polypeptide</a>          | <a href="#">Fcer1a</a>          | E | 175.155.312 | 477 | 9  | 467 |
| 1 | 54 | <a href="#">spectrin alpha 1</a>                                              | <a href="#">Spna1</a>           | I | 176.167.204 | 422 | 23 | 412 |
| 1 | 55 | <a href="#">regulator of G protein signaling 7</a>                            | <a href="#">Rgs7</a>            | I | 176.993.722 | 362 | 9  | 352 |
| 1 | 56 | <a href="#">phospholipase D family, member 5</a>                              | <a href="#">Pld5</a>            | I | 178.046.546 | 372 | 9  | 362 |
| 1 | 57 | <a href="#">_similar to chromosome 1 open reading frame 101</a>               |                                 | I | 179.842.251 | 405 | 7  | 395 |
| 1 | 58 | <a href="#">hypothetical protein LOC78825</a>                                 |                                 | I | 180.158.370 | 229 | 13 | 219 |
| 1 | 59 | <a href="#">_SET and MYND domain containing 3</a>                             | <a href="#">Smyd3</a>           | I | 181.421.928 | 388 | 28 | 378 |
| 1 | 60 | <a href="#">leucine zipper transcription regulator 2</a>                      | <a href="#">Sec16b</a>          | I | 159.463.296 | 400 | 8  | 390 |
| 1 | 61 | <a href="#">RAB GTPase activating protein 1-like isoform b</a>                | <a href="#">Rabgap1l</a>        | I | 162.258.156 | 358 | 15 | 348 |
|   |    | <a href="#">_RAB GTPase activating protein 1-like isoform a</a>               | <a href="#">Rabgap1l</a>        | I |             |     |    |     |
| 1 | 62 | <a href="#">coagulation factor V</a>                                          | <a href="#">F5</a>              | E | 166.138.907 | 404 | 6  | 394 |
| 1 | 63 | <a href="#">_Cdc42 binding protein kinase alpha isoform 16</a>                | <a href="#">Cdc42bpa</a>        | I | 181.997.769 | 395 | 23 | 385 |
|   |    | <a href="#">_Cdc42 binding protein kinase alpha isoform 14</a>                | <a href="#">Cdc42bpa</a>        | I |             |     |    |     |
| 1 | 64 | <a href="#">usherin</a>                                                       | <a href="#">Ush2a</a>           | I | 190.340.675 | 324 | 23 | 314 |
| 1 | 65 | <a href="#">transforming growth factor, beta 2</a>                            | <a href="#">Tgfb2</a>           | I | 188.460.286 | 321 | 21 | 311 |

|   |    |                                                                              |                            |   |             |     |    |     |
|---|----|------------------------------------------------------------------------------|----------------------------|---|-------------|-----|----|-----|
| 1 | 66 | <a href="#">usherin</a>                                                      | <a href="#">Ush2a</a>      | I | 190.234.720 | 405 | 7  | 395 |
| 1 | 67 | <a href="#">synaptotagmin XIV</a>                                            | <a href="#">Syt14</a>      | I | 194.850.134 | 216 | 24 | 206 |
| 2 | 68 | <a href="#">NOL1/NOP2/Sun domain family 6</a>                                |                            | I | 14963053    | 254 | 14 | 244 |
| 2 | 69 | <a href="#">enhancer trap locus 4</a>                                        | <a href="#">Etl4</a>       | I | 20355591    | 338 | 11 | 328 |
| 2 | 70 | <a href="#">USP6 N-terminal like isoform b</a>                               | <a href="#">Usp6nl</a>     | I | 6275100     | 459 | 28 | 449 |
| 2 |    | <a href="#">USP6 N-terminal like isoform a</a>                               | <a href="#">Usp6nl</a>     | I |             |     |    |     |
| 2 | 71 | <a href="#">hypothetical protein</a>                                         |                            | I | 7347002     | 379 | 34 | 369 |
| 2 | 72 | <a href="#">plexin domain containing 2 precursor</a>                         | <a href="#">Plxdc2</a>     | I | 16332982    | 407 | 11 | 397 |
| 2 | 73 | <a href="#">hypothetical protein LOC75069</a>                                |                            | I | 16894723    | 414 | 28 | 404 |
| 2 | 74 | <a href="#">hypothetical protein LOC75069</a>                                |                            | I | 16896540    | 378 | 33 | 368 |
| 2 | 75 | <a href="#">enkurin</a>                                                      | <a href="#">Enkur</a>      | I | 21122616    | 387 | 32 | 377 |
| 2 | 76 | <a href="#">spectrin SH3 domain binding protein 1 isoform 1</a>              | <a href="#">Abi1</a>       | E | 22826598    | 351 | 26 | 341 |
|   |    | <a href="#">spectrin SH3 domain binding protein 1 isoform 4</a>              | <a href="#">Abi1</a>       | I |             |     |    |     |
| 2 | 77 | <a href="#">pre B-cell leukemia transcription factor 3</a>                   | <a href="#">Pbx3</a>       | I | 34040634    | 454 | 27 | 444 |
| 2 | 78 | <a href="#">mitogen-activated protein kinase associated protein 1</a>        | <a href="#">Mapkap1</a>    | I | 34380168    | 297 | 21 | 287 |
| 2 | 79 | <a href="#">Scai suppressor of cancer cell invasion</a>                      | <a href="#">Scai</a>       | I | 39024408    | 474 | 20 | 464 |
| 2 | 80 | <a href="#">nebulin</a>                                                      | <a href="#">Neb</a>        | I | 52071705    | 322 | 29 | 312 |
| 2 | 81 | <a href="#">UDP-N-acetyl-alpha-D-galactosamine:polypeptide N-acetylga...</a> | <a href="#">Galnt3</a>     | I | 54516885    | 338 | 12 | 328 |
| 2 | 82 | <a href="#">TGF-beta induced apoptosis protein 2</a>                         | <a href="#">Csrnp3</a>     | I | 65855178    | 265 | 8  | 255 |
| 2 | 83 | <a href="#">myosin IIIB</a>                                                  | <a href="#">Myo3b</a>      | I | 70201238    | 385 | 19 | 375 |
| 2 | 84 | <a href="#">tousled-like kinase 1</a>                                        | <a href="#">Tlk1</a>       | E | 70555792    | 250 | 24 | 240 |
| 2 | 85 | <a href="#">leucine zipper- and sterile alpha motif-containing kinase...</a> | <a href="#">Z30120H23F</a> | I | 72176292    | 381 | 9  | 371 |
|   |    | <a href="#">leucine zipper- and sterile alpha motif-containing kinase...</a> | <a href="#">Z30120H23F</a> | I |             |     |    |     |
| 2 | 86 | <a href="#">mitogen activated protein kinase 8 interacting protein 1</a>     | <a href="#">Mapk8ip1</a>   | I | 92232025    | 195 | 22 | 185 |
| 2 | 87 | <a href="#">low density lipoprotein receptor class A domain containing 3</a> | <a href="#">Ldlrad3</a>    | I | 102006178   | 333 | 9  | 323 |
| 2 | 88 | <a href="#">homeodomain interacting protein kinase 3</a>                     | <a href="#">Hipk3</a>      | I | 104272391   | 305 | 11 | 295 |
| 2 | 89 | <a href="#">kinesin family member 18A</a>                                    | <a href="#">Kif18a</a>     | I | 109171302   | 390 | 17 | 380 |
| 2 | 90 | <a href="#">hypothetical protein LOC399568</a>                               | <a href="#">BC052040</a>   | I | 115561155   | 283 | 29 | 273 |
| 2 | 91 | <a href="#">cancer susceptibility candidate 5</a>                            | <a href="#">Casc5</a>      | E | 118913228   | 414 | 15 | 404 |
| 2 | 92 | <a href="#">calcium binding protein P22</a>                                  | <a href="#">i00003O03F</a> | I | 119382589   | 374 | 10 | 364 |
| 2 | 93 | <a href="#">transformation related protein 53 binding protein 1</a>          | <a href="#">Trp53bp1</a>   | I | 121092645   | 383 | 15 | 373 |
| 2 | 94 | <a href="#">proprotein convertase subtilisin/kexin type 2</a>                | <a href="#">Pcsk2</a>      | I | 143466704   | 191 | 14 | 181 |
| 2 | 95 | <a href="#">D-tyrosyl-tRNA deacylase 1</a>                                   | <a href="#">Dtd1</a>       | I | 144529152   | 156 | 8  | 146 |
| 2 | 96 | <a href="#">protein tyrosine phosphatase, receptor type, T</a>               | <a href="#">Ptprt</a>      | I | 161585121   | 530 | 17 | 520 |
| 2 | 97 | <a href="#">solute carrier family 4, sodium bicarbonate cotransporter...</a> | <a href="#">Slc4a11</a>    | I | 62074716    | 397 | 30 | 387 |
| 2 | 98 | <a href="#">sodium channel, voltage-gated, type VII, alpha polypeptide</a>   | <a href="#">Scn7a</a>      | I | 66546166    | 318 | 7  | 308 |
| 2 | 99 | <a href="#">sodium channel, voltage-gated, type VII, alpha polypeptide</a>   | <a href="#">Scn7a</a>      | I | 66553896    | 409 | 25 | 399 |

|   |     |                                                                               |                           |   |           |     |    |     |
|---|-----|-------------------------------------------------------------------------------|---------------------------|---|-----------|-----|----|-----|
| 2 | 100 | <a href="#">zinc finger protein 533</a>                                       | <a href="#">Zfp385b</a>   | I | 77527272  | 351 | 26 | 341 |
| 2 | 101 | <a href="#">hypothetical protein LOC72446</a>                                 |                           | I | 101579268 | 389 | 11 | 379 |
|   |     | <a href="#">_hypothetical protein LOC72446</a>                                |                           | I |           |     |    |     |
| 2 | 102 | <a href="#">low density lipoprotein receptor class A domain containing 3</a>  | <a href="#">Ldlrad3</a>   | I | 101891909 | 303 | 7  | 293 |
| 2 | 103 | <a href="#">yeast INO80-like protein</a>                                      | <a href="#">Ino80</a>     | I | 119228404 | 340 | 16 | 330 |
| 2 | 104 | <a href="#">MAX-interacting protein</a>                                       | <a href="#">Mga</a>       | E | 119772746 | 366 | 15 | 356 |
| 2 | 105 | <a href="#">FERM domain containing 5</a>                                      | <a href="#">Frmf5</a>     | I | 121522980 | 404 | 23 | 394 |
| 2 | 106 | <a href="#">hypothetical protein LOC629499</a>                                | <a href="#">22505G16F</a> | I | 157092587 | 352 | 22 | 342 |
| 2 | 107 | <a href="#">protein tyrosine phosphatase, receptor type, T</a>                | <a href="#">Ptprt</a>     | I | 161657905 | 487 | 32 | 477 |
| 2 | 108 | <a href="#">tumor differentially expressed protein 1</a>                      | <a href="#">Serinc3</a>   | I | 163461363 | 395 | 22 | 385 |
| 2 | 109 | <a href="#">RAB22A, member RAS oncogene family</a>                            | <a href="#">Rab22a</a>    | I | 173491893 | 364 | 22 | 354 |
| 3 | 110 | <a href="#">zinc finger homeodomain 4</a>                                     | <a href="#">Zfx4</a>      | I | 4835075   | 503 | 27 | 493 |
| 3 | 111 | <a href="#">hypothetical protein LOC67306</a>                                 | <a href="#">Fam164a</a>   | I | 5290623   | 199 | 24 | 189 |
| 3 | 112 | <a href="#">glucocorticoid induced gene 1</a>                                 | <a href="#">Zfp704</a>    | I | 9598377   | 148 | 29 | 138 |
| 3 | 113 | <a href="#">zinc finger homeodomain 4</a>                                     | <a href="#">Zfx4</a>      | I | 5324427   | 409 | 22 | 399 |
| 3 | 114 | <a href="#">SIRP beta 1 isoform 3</a>                                         | <a href="#">Sirpb1</a>    | I | 15418056  | 133 | 17 | 123 |
|   |     | <a href="#">_SIRP beta 1 isoform 2</a>                                        | <a href="#">Sirpb1</a>    | I |           |     |    |     |
| 3 | 115 | <a href="#">_hypothetical protein</a>                                         |                           | I | 15549665  | 133 | 17 | 123 |
| 3 | 116 | <a href="#">transient receptor potential cation channel, subfamily C,...</a>  | <a href="#">Trpc4</a>     | I | 36555000  | 444 | 13 | 434 |
| 3 | 117 | <a href="#">hypothetical protein LOC229227</a>                                |                           | I | 36859369  | 221 | 25 | 211 |
| 3 | 118 | <a href="#">neuroigin 1</a>                                                   | <a href="#">Nlgn1</a>     | I | 25570499  | 341 | 9  | 331 |
| 3 | 119 | <a href="#">hypothetical protein LOC75740 isoform 1</a>                       |                           | I | 29109962  | 375 | 7  | 365 |
| 3 | 120 | <a href="#">ATPase, Class VI, type 11B</a>                                    | <a href="#">Atp11b</a>    | I | 35657037  | 419 | 26 | 409 |
| 3 | 121 | <a href="#">fibroblast growth factor 2</a>                                    | <a href="#">Fgf2</a>      | I | 37254066  | 613 | 12 | 603 |
| 3 | 122 | <a href="#">major facilitator superfamily domain containing 8</a>             | <a href="#">Mfsd8</a>     | I | 40634522  | 387 | 17 | 377 |
| 3 | 123 | <a href="#">_hypothetical protein</a>                                         |                           | I | 133526974 | 151 | 16 | 141 |
| 3 | 124 | <a href="#">hypothetical protein</a>                                          |                           | I | 133547690 | 593 | 20 | 583 |
| 3 | 125 | <a href="#">TNNI3 interacting kinase</a>                                      | <a href="#">Tnni3k</a>    | I | 154467799 | 449 | 15 | 439 |
| 3 | 126 | <a href="#">neurotractin isoform b</a>                                        | <a href="#">Negr1</a>     | I | 156415988 | 339 | 10 | 329 |
|   |     | <a href="#">_neurotractin isoform a</a>                                       | <a href="#">Negr1</a>     | I |           |     |    |     |
| 3 | 127 | <a href="#">glutathione S-transferase, C-terminal domain containing</a>       | <a href="#">Gstcd</a>     | I | 132712062 | 460 | 22 | 450 |
| 3 | 128 | <a href="#">hypothetical protein</a>                                          |                           | I | 133874908 | 384 | 26 | 374 |
| 3 | 129 | <a href="#">hypothetical protein LOC381476</a>                                | <a href="#">30007M17F</a> | I | 139212689 | 335 | 29 | 325 |
| 3 | 130 | <a href="#">_phosphatidylinositol glycan anchor biosynthesis, class K ...</a> | <a href="#">Pigk</a>      | I | 152426656 | 247 | 24 | 237 |
|   |     | <a href="#">_phosphatidylinositol glycan anchor biosynthesis, class K ...</a> | <a href="#">Pigk</a>      | I |           |     |    |     |
| 3 | 131 | <a href="#">hypothetical protein</a>                                          |                           | I | 152833836 | 415 | 13 | 405 |
| 4 | 132 | <a href="#">thymocyte selection-associated HMG box</a>                        | <a href="#">Tox</a>       | I | 6884978   | 436 | 10 | 426 |



|   |     |                                                                              |                            |   |           |     |    |     |
|---|-----|------------------------------------------------------------------------------|----------------------------|---|-----------|-----|----|-----|
| 4 | 133 | <a href="#">F-box and leucine-rich repeat protein 4</a>                      | <a href="#">Fbxl4</a>      | I | 22322567  | 381 | 6  | 371 |
| 4 | 134 | <a href="#">hypothetical protein LOC69984</a>                                | <a href="#">'00025O08F</a> | I | 22767633  | 360 | 24 | 350 |
| 4 | 135 | <a href="#">thymocyte selection-associated HMG box</a>                       | <a href="#">Tox</a>        | I | 6706981   | 407 | 11 | 397 |
| 4 | 136 | <a href="#">hypothetical protein LOC73314</a>                                |                            | I | 14679121  | 429 | 20 | 419 |
| 4 | 137 | <a href="#">kelch-like 32</a>                                                | <a href="#">Kihl32</a>     | I | 24556591  | 385 | 27 | 375 |
| 4 | 138 | <a href="#">Eph receptor A7</a>                                              | <a href="#">Epha7</a>      | I | 28821935  | 522 | 19 | 512 |
| 4 | 139 | <a href="#">ATP-binding cassette 1, sub-family A, member 1</a>               | <a href="#">Abca1</a>      | E | 53121735  | 522 | 6  | 512 |
| 4 | 140 | <a href="#">polydom precursor</a>                                            | <a href="#">Svep1</a>      | I | 58153774  | 417 | 12 | 407 |
| 4 | 141 | <a href="#">RAD23b homolog</a>                                               | <a href="#">Rad23b</a>     | E | 55380358  | 437 | 26 | 427 |
| 4 | 142 | <a href="#">hypothetical protein LOC214106</a>                               | <a href="#">933430117R</a> | I | 62195461  | 384 | 22 | 374 |
| 4 | 143 | <a href="#">transducin-like enhancer protein 1</a>                           | <a href="#">Tle1</a>       | I | 71795825  | 403 | 24 | 393 |
| 4 | 144 | <a href="#">FERM domain containing 3</a>                                     | <a href="#">Frmf3</a>      | I | 73809355  | 525 | 27 | 515 |
| 4 | 145 | <a href="#">gene amplified in squamous cell carcinoma 1</a>                  | <a href="#">Kdm4c</a>      | I | 73959967  | 474 | 7  | 464 |
| 4 | 146 | <a href="#">hypothetical protein</a>                                         |                            | I | 77577045  | 477 | 9  | 467 |
| 4 | 147 | <a href="#">hypothetical protein</a>                                         |                            | I | 81733476  | 479 | 24 | 469 |
| 4 | 148 | <a href="#">SH3-domain GRB2-like 2</a>                                       | <a href="#">Sh3gl2</a>     | I | 84906885  | 247 | 29 | 237 |
| 4 | 149 | <a href="#">deleted in bladder cancer chromosome region candidate 1</a>      | <a href="#">Dbc1</a>       | I | 68464077  | 385 | 27 | 375 |
| 4 | 150 | <a href="#">protein tyrosine phosphatase, receptor type, D isoform B</a>     | <a href="#">Ptprd</a>      | I | 75741017  | 390 | 26 | 380 |
|   |     | <a href="#">protein tyrosine phosphatase, receptor type, D isoform A</a>     |                            |   |           |     |    |     |
| 4 | 151 | <a href="#">hypothetical protein LOC320226</a>                               | <a href="#">930473A06F</a> | I | 83260683  | 486 | 12 | 476 |
| 4 | 152 | <a href="#">SH3-domain GRB2-like 2</a>                                       | <a href="#">Sh3gl2</a>     | I | 84991610  | 292 | 14 | 282 |
| 4 | 153 | <a href="#">hypothetical protein</a>                                         |                            | I | 85306106  | 421 | 34 | 411 |
| 4 | 154 | <a href="#">Fas-associated factor 1</a>                                      | <a href="#">Faf1</a>       | I | 109422649 | 391 | 16 | 381 |
| 4 | 155 | <a href="#">hypothetical protein</a>                                         |                            | I | 114175847 | 412 | 28 | 402 |
| 4 | 156 | <a href="#">phosphatidic acid phosphatase type 2B</a>                        | <a href="#">Ppap2b</a>     | I | 104875938 | 301 | 20 | 291 |
| 4 | 157 | <a href="#">endoplasmic reticulum protein ERp19</a>                          | <a href="#">Txndc12</a>    | I | 108514992 | 414 | 15 | 404 |
| 4 | 158 | <a href="#">hypothetical protein LOC230613</a>                               |                            | I | 112404708 | 381 | 9  | 371 |
| 4 | 159 | <a href="#">hypothetical protein</a>                                         |                            | I | 125102194 | 586 | 15 | 576 |
| 4 | 160 | <a href="#">zinc finger protein 258</a>                                      | <a href="#">Zmym6</a>      | I | 126797821 | 403 | 27 | 393 |
| 4 | 161 | <a href="#">podoplanin</a>                                                   | <a href="#">Pdpn</a>       | I | 142859844 | 239 | 27 | 229 |
| 5 | 162 | <a href="#">hypothetical protein LOC231014</a>                               | <a href="#">330182L06R</a> | I | 15566827  | 371 | 18 | 361 |
| 5 | 163 | <a href="#">piccolo (presynaptic cytomatrix protein)</a>                     | <a href="#">Pclo</a>       | I | 14705456  | 376 | 28 | 366 |
| 5 | 164 | <a href="#">semaphorin 3E</a>                                                | <a href="#">Sema3e</a>     | I | 14200804  | 416 | 20 | 406 |
| 5 | 165 | <a href="#">piccolo (presynaptic cytomatrix protein)</a>                     | <a href="#">Pclo</a>       | I | 14722143  | 374 | 11 | 364 |
| 5 | 166 | <a href="#">membrane associated guanylate kinase, WW and PDZ domain c...</a> | <a href="#">Magi2</a>      | I | 19538552  | 390 | 29 | 380 |
| 5 | 167 | <a href="#">membrane associated guanylate kinase, WW and PDZ domain c...</a> | <a href="#">Magi2</a>      | I | 19780578  | 386 | 23 | 376 |
|   |     | <a href="#">membrane associated guanylate kinase, WW and PDZ domain c...</a> | <a href="#">Magi2</a>      | I |           |     |    |     |

|   |     |                                                                              |                            |     |           |     |    |     |
|---|-----|------------------------------------------------------------------------------|----------------------------|-----|-----------|-----|----|-----|
| 5 | 168 | <a href="#">F-box and leucine-rich repeat protein 13</a>                     | <a href="#">FBXL13</a>     | E   | 21120406  | 387 | 7  | 377 |
| 5 | 169 | <a href="#">reelin precursor</a>                                             | <a href="#">Reln</a>       | E   | 21426083  | 392 | 23 | 382 |
| 5 | 170 | <a href="#">calcium channel, voltage-dependent, alpha2/delta subunit 1</a>   | <a href="#">Cacna2d1</a>   | I   | 15556660  | 415 | 7  | 405 |
| 5 | 171 | <a href="#">calcium channel, voltage-dependent, alpha2/delta subunit 1</a>   | <a href="#">Cacna2d1</a>   | I   | 15566827  | 371 | 18 | 361 |
| 5 | 172 | <a href="#">membrane associated guanylate kinase, WW and PDZ domain c...</a> | <a href="#">Magi2</a>      | I   | 18815491  | 364 | 13 | 354 |
| 5 | 173 | <a href="#">reelin precursor</a>                                             | <a href="#">Reln</a>       | I   | 21426957  | 305 | 21 | 295 |
| 5 | 174 | <a href="#">brain and reproductive organ-expressed protein isoform V</a>     | <a href="#">Bre</a>        | I   | 32036303  | 348 | 29 | 338 |
|   |     | <a href="#">brain and reproductive organ-expressed protein isoform I</a>     | <a href="#">Bre</a>        | I   |           |     |    |     |
|   |     |                                                                              | <a href="#">D5Ert579</a>   |     |           |     |    |     |
| 5 | 175 | <a href="#">hypothetical protein LOC320661</a>                               | <a href="#">e</a>          | E   | 36963847  | 416 | 26 | 406 |
| 5 | 176 | <a href="#">LIM domain binding 2 isoform 1</a>                               | <a href="#">Ldb2</a>       | I   | 45064428  | 464 | 7  | 454 |
|   |     | <a href="#">LIM domain binding 2 isoform 2</a>                               | <a href="#">Ldb2</a>       | I   |           |     |    |     |
| 5 | 177 | <a href="#">slit homolog 2</a>                                               | <a href="#">Slit2</a>      | I   | 48508580  | 334 | 26 | 324 |
| 5 | 178 | <a href="#">potassium channel interacting protein 4</a>                      | <a href="#">Kcnip4</a>     | I 1 | 49159664  | 375 | 30 | 365 |
| 5 | 179 | <a href="#">hypothetical protein LOC319807</a>                               | <a href="#">I10047P20R</a> | I   | 64183394  | 401 | 17 | 391 |
| 5 | 180 | <a href="#">corin</a>                                                        | <a href="#">corin</a>      | I   | 72870725  | 624 | 8  | 614 |
| 5 | 181 | <a href="#">Bod1l biorientation of chromosomes in cell division 1-like</a>   | <a href="#">Bod1l</a>      | I   | 42224856  | 331 | 27 | 321 |
| 5 | 182 | <a href="#">hypothetical protein LOC66768</a>                                |                            | I   | 48768546  | 284 | 16 | 274 |
| 5 | 183 | <a href="#">potassium channel tetramerisation domain containing 8</a>        | <a href="#">Kctd8</a>      | I   | 69602587  | 525 | 34 | 515 |
| 5 | 184 | <a href="#">circadian locomotor output cycles kaput</a>                      | <a href="#">Clock</a>      | I   | 76668944  | 377 | 23 | 367 |
| 5 | 185 | <a href="#">hypothetical protein</a>                                         |                            | I   | 117119419 | 230 | 11 | 220 |
| 5 | 186 | <a href="#">density-regulated protein</a>                                    | <a href="#">Denr</a>       | I   | 124370261 | 340 | 18 | 330 |
| 5 | 187 | <a href="#">thyroid hormone receptor associated protein 2</a>                | <a href="#">Med13l</a>     | I   | 119148011 | 364 | 34 | 354 |
| 5 | 188 | <a href="#">hypothetical protein LOC243274</a>                               |                            | I   | 128646608 | 367 | 34 | 357 |
| 5 | 189 | <a href="#">UDP-GalNAc:polypeptide N-acetylgalactosaminyltransferase-...</a> | <a href="#">Wbscr17</a>    | I   | 131358154 | 388 | 22 | 378 |
| 5 | 190 | <a href="#">calneuron 1</a>                                                  | <a href="#">Caln1</a>      | I   | 131094713 | 406 | 25 | 396 |
| 5 | 191 | <a href="#">autism susceptibility candidate 2</a>                            | <a href="#">Aut2</a>       | I   | 132247742 | 375 | 16 | 365 |
| 5 | 192 | <a href="#">autism susceptibility candidate 2</a>                            | <a href="#">Aut2</a>       | I   | 132933820 | 398 | 30 | 388 |
| 5 | 193 | <a href="#">IQ motif containing E</a>                                        | <a href="#">Iqce</a>       | I   | 141176358 | 152 | 26 | 142 |
| 5 | 194 | <a href="#">RNA polymerase 1-3 isoform 2</a>                                 | <a href="#">Polr1d</a>     | I   | 147900661 | 423 | 25 | 413 |
| 5 | 195 | <a href="#">PABP-dependent poly(A) nuclease 3</a>                            | <a href="#">Pan3</a>       | I   | 148340676 | 377 | 6  | 367 |
| 5 | 196 | <a href="#">furry homolog</a>                                                | <a href="#">Fryl</a>       | I   | 151115811 | 384 | 19 | 374 |
| 6 | 197 | <a href="#">solute carrier family 13 (sodium/sulphate symporters), me...</a> | <a href="#">Slc13a1</a>    | I   | 24103218  | 366 | 27 | 356 |
| 6 | 198 | <a href="#">glutamate receptor, metabotropic 7</a>                           | <a href="#">Grm7</a>       | I   | 27423429  | 392 | 30 | 382 |
| 6 | 199 | <a href="#">low density lipoprotein-related protein 12 isoform 2</a>         | <a href="#">St7</a>        | I   | 17705603  | 371 | 12 | 361 |
|   |     | <a href="#">low density lipoprotein-related protein 12 isoform 1</a>         | <a href="#">St7</a>        | I   |           |     |    |     |
| 6 | 200 | <a href="#">glutamate receptor, metabotropic 7</a>                           | <a href="#">Grm7</a>       | I   | 28035853  | 338 | 24 | 328 |

|   |     |                                                                            |                         |   |           |     |    |     |
|---|-----|----------------------------------------------------------------------------|-------------------------|---|-----------|-----|----|-----|
| 6 | 201 | <a href="#">nuclear respiratory factor 1</a>                               | <a href="#">Nrf1</a>    |   | 30084241  | 438 | 24 | 428 |
| 6 | 202 | <a href="#">diacylglycerol kinase, iota</a>                                | <a href="#">Dgki</a>    |   | 36896027  | 587 | 8  | 577 |
| 6 | 203 | <a href="#">Eph receptor A1</a>                                            | <a href="#">Epha1</a>   |   | 42318344  | 330 | 17 | 320 |
| 6 | 204 | <a href="#">contactin associated protein-like 2 isoform a</a>              | <a href="#">Cntnap2</a> |   | 46324163  | 359 | 21 | 349 |
| 6 | 205 | <a href="#">muskelin 1, intracellular mediator containing kelch motifs</a> | <a href="#">Mkln1</a>   |   | 31436334  | 184 | 26 | 174 |
| 6 | 206 | <a href="#">caldesmon 1</a>                                                | <a href="#">Cald1</a>   |   | 34693736  | 406 | 12 | 396 |
| 6 | 207 | <a href="#">homeodomain interacting protein kinase 2</a>                   | <a href="#">Hipk2</a>   |   | 38725904  | 260 | 13 | 250 |
| 6 | 208 | <a href="#">thiamin pyrophosphokinase</a>                                  | <a href="#">tpk1</a>    |   | 43561490  | 372 | 31 | 362 |
| 6 | 209 | <a href="#">SKAP55 homologue</a>                                           | <a href="#">Skap2</a>   |   | 51942667  | 244 | 26 | 234 |
| 6 | 210 | <a href="#">hect domain and RLD 5 isoform 2</a>                            | <a href="#">Herc5</a>   |   | 57602531  | 409 | 13 | 399 |
|   |     | <a href="#">hect domain and RLD 5 isoform 1</a>                            |                         |   |           |     |    |     |
| 6 | 211 | <a href="#">hypothetical protein LOC232035</a>                             | <a href="#">Fam190a</a> |   | 61443245  | 449 | 26 | 439 |
| 6 | 212 | <a href="#">catenin (cadherin associated protein), alpha 2 isoform 1</a>   | <a href="#">Ctnna2</a>  |   | 76947234  | 448 | 11 | 438 |
|   |     | <a href="#">catenin (cadherin associated protein), alpha 2 isoform 2</a>   |                         |   |           |     |    |     |
| 6 | 213 | <a href="#">catenin (cadherin associated protein), alpha 2 isoform 1</a>   | <a href="#">Ctnna2</a>  |   | 77087477  | 422 | 25 | 412 |
|   |     | <a href="#">catenin (cadherin associated protein), alpha 2 isoform 2</a>   |                         |   |           |     |    |     |
| 6 | 214 | <a href="#">sideroflexin 5</a>                                             | <a href="#">Sfxn5</a>   |   | 85225402  | 153 | 19 | 143 |
| 6 | 215 | <a href="#">TAF1 protein</a>                                               | <a href="#">Fam19a1</a> |   | 96447571  | 372 | 14 | 362 |
| 6 | 216 | <a href="#">hypothetical protein</a>                                       |                         |   | 105559070 | 265 | 21 | 255 |
| 6 | 217 | <a href="#">contactin 4</a>                                                | <a href="#">Cntn4</a>   |   | 106441937 | 396 | 9  | 386 |
| 6 | 218 | <a href="#">inositol 1,4,5-triphosphate receptor 1</a>                     | <a href="#">Itpr1</a>   |   | 108490208 | 149 | 13 | 139 |
| 6 | 219 | <a href="#">transmembrane and coiled coil domains 1 isoform 2</a>          | <a href="#">Tmcc1</a>   |   | 116032993 | 413 | 22 | 403 |
| 6 | 220 | <a href="#">SKAP55 homologue</a>                                           | <a href="#">Skap2</a>   |   | 51835090  | 420 | 32 | 410 |
| 6 | 221 | <a href="#">5'-nucleotidase, cytosolic III</a>                             | <a href="#">Nt5c3</a>   |   | 56858159  | 454 | 7  | 444 |
| 6 | 222 | <a href="#">synuclein, alpha</a>                                           | <a href="#">Snca</a>    |   | 60726448  | 377 | 9  | 367 |
|   |     | <a href="#">synuclein, alpha</a>                                           |                         |   |           |     |    |     |
| 6 | 223 | <a href="#">hypothetical protein LOC232035</a>                             | <a href="#">Fam190a</a> |   | 61724365  | 216 | 32 | 206 |
| 6 | 224 | <a href="#">interleukin 23 receptor</a>                                    | <a href="#">Il23r</a>   |   | 67385939  | 382 | 9  | 372 |
| 6 | 225 | <a href="#">zinc finger protein 638</a>                                    | <a href="#">Zfml</a>    | E | 83933637  | 261 | 11 | 251 |
| 6 | 226 | <a href="#">SEC15-like 2 isoform 1</a>                                     | <a href="#">Exoc6b</a>  |   | 84845703  | 371 | 15 | 361 |
|   |     | <a href="#">SEC15-like 2 isoform 2</a>                                     |                         |   |           |     |    |     |
| 6 | 227 | <a href="#">TAF1 protein</a>                                               | <a href="#">Fam19a1</a> |   | 96208364  | 346 | 24 | 336 |
| 6 | 228 | <a href="#">forkhead box P1</a>                                            | <a href="#">Foxp1</a>   |   | 98944861  | 474 | 17 | 464 |
| 6 | 229 | <a href="#">RING1 and YY1 binding protein</a>                              | <a href="#">Rybp</a>    |   | 100224064 | 333 | 30 | 323 |
| 6 | 230 | <a href="#">glutamate receptor, metabotropic 7</a>                         | <a href="#">Grm7</a>    |   | 110745643 | 316 | 14 | 306 |
| 6 | 231 | <a href="#">bromodomain containing 1</a>                                   | <a href="#">Brpf1</a>   |   | 113263834 | 560 | 8  | 550 |
| 6 | 232 | <a href="#">calcium/calmodulin-dependent protein kinase I</a>              | <a href="#">Camk1</a>   |   | 113288428 | 450 | 27 | 440 |

|   |     |                                                                   |                           |  |           |     |    |     |
|---|-----|-------------------------------------------------------------------|---------------------------|--|-----------|-----|----|-----|
| 6 | 233 | <a href="#">peroxisome proliferator activated receptor gamma</a>  | <a href="#">Pparg</a>     |  | 115372421 | 553 | 14 | 543 |
| 6 | 234 | <a href="#">transmembrane and coiled coil domains 1 isoform 2</a> | <a href="#">Tmcc1</a>     |  | 116055162 | 265 | 18 | 255 |
| 6 | 235 | <a href="#">wingless-related MMTV integration site 5B</a>         | <a href="#">Wnt5b</a>     |  | 119385969 | 155 | 7  | 145 |
|   |     |                                                                   | <a href="#">573041910</a> |  |           |     |    |     |
| 6 | 236 | <a href="#">hypothetical protein LOC74741</a>                     | <a href="#">9Rik</a>      |  | 142974314 | 199 | 14 | 189 |
| 6 | 237 | <a href="#">phosphodiesterase 3A, cGMP inhibited</a>              | <a href="#">Pdea3</a>     |  | 141333951 | 502 | 14 | 492 |
| 6 | 238 | <a href="#">mitochondrial ribosomal protein S35</a>               | <a href="#">Mrps35</a>    |  | 147000322 | 368 | 8  | 358 |
| 6 | 239 | <a href="#">FGFR1 oncogene partner 2</a>                          | <a href="#">Fgfr1op2</a>  |  | 146538725 | 377 | 34 | 367 |
| 7 | 240 | <a href="#">similar to vomeronasal 2, receptor, 15 isoform 3</a>  | <a href="#">LOC628326</a> |  | 8258601   | 390 | 11 | 380 |
| 7 |     | <a href="#">similar to vomeronasal 2, receptor, 15 isoform 2</a>  |                           |  |           |     |    |     |
| 7 | 241 | <a href="#">similar to vomeronasal 2, receptor, 15 isoform 2</a>  | <a href="#">LOC628326</a> |  | 8570852   | 387 | 11 | 377 |
|   |     | <a href="#">similar to vomeronasal 2, receptor, 15 isoform 1</a>  |                           |  |           |     |    |     |
| 7 | 242 | <a href="#">vomeronasal 2, receptor, 14</a>                       | <a href="#">LOC628326</a> |  | 8960473   | 388 | 11 | 378 |
| 7 | 243 | <a href="#">similar to vomeronasal 2, receptor, 15 isoform 1</a>  | <a href="#">LOC628326</a> |  | 9058179   | 390 | 11 | 380 |
| 7 | 244 | <a href="#">similar to putative pheromone receptor</a>            | <a href="#">LOC628326</a> |  | 9213863   | 388 | 11 | 378 |
| 7 | 245 | <a href="#">similar to vomeronasal 2, receptor, 15 isoform 1</a>  | <a href="#">LOC628326</a> |  | 9257906   | 387 | 11 | 377 |
|   |     | <a href="#">similar to vomeronasal 2, receptor, 15 isoform 2</a>  |                           |  |           |     |    |     |
| 7 | 246 | <a href="#">similar to vomeronasal 2, receptor, 15 isoform 3</a>  | <a href="#">LOC628326</a> |  | 9364502   | 390 | 11 | 380 |
|   |     | <a href="#">similar to vomeronasal 2, receptor, 15 isoform 2</a>  |                           |  |           |     |    |     |
| 7 | 247 | <a href="#">similar to vomeronasal 2, receptor, 14 isoform 2</a>  | <a href="#">LOC545908</a> |  | 9644408   | 390 | 11 | 380 |
|   |     | <a href="#">similar to vomeronasal 2, receptor, 14 isoform 1</a>  |                           |  |           |     |    |     |
| 7 | 248 | <a href="#">similar to putative pheromone receptor</a>            |                           |  | 9933134   | 388 | 11 | 378 |
| 7 | 249 | <a href="#">similar to vomeronasal 2, receptor, 15 isoform 1</a>  | <a href="#">LOC628326</a> |  | 9977237   | 387 | 11 | 377 |
|   |     | <a href="#">similar to vomeronasal 2, receptor, 15 isoform 2</a>  |                           |  |           |     |    |     |
| 7 | 250 | <a href="#">hypothetical protein LOC232947</a>                    |                           |  | 20138548  | 260 | 17 | 250 |
| 7 | 251 | <a href="#">protein tyrosine phosphatase, receptor type, H</a>    | <a href="#">Ptprh</a>     |  | 4551693   | 203 | 32 | 193 |
| 7 | 252 | <a href="#">vomeronasal 2, receptor, 15</a>                       | <a href="#">LOC628326</a> |  | 7276756   | 390 | 11 | 380 |
| 7 | 253 | <a href="#">vomeronasal 2, receptor, 5 isoform 1</a>              | <a href="#">Vmn2r32</a>   |  | 7426056   | 388 | 11 | 378 |
| 7 | 254 | <a href="#">similar to vomeronasal 2, receptor, 14 isoform 1</a>  | <a href="#">LOC545908</a> |  | 7635348   | 388 | 11 | 378 |
|   |     | <a href="#">similar to vomeronasal 2, receptor, 14 isoform 2</a>  |                           |  |           |     |    |     |
| 7 | 255 | <a href="#">similar to vomeronasal 2, receptor, 15 isoform 2</a>  | <a href="#">LOC628326</a> |  | 7840959   | 387 | 11 | 377 |
|   |     | <a href="#">similar to vomeronasal 2, receptor, 15 isoform 1</a>  |                           |  |           |     |    |     |
| 7 | 256 | <a href="#">similar to vomeronasal 2, receptor, 14 isoform 1</a>  | <a href="#">LOC545908</a> |  | 8074941   | 387 | 11 | 377 |
|   |     | <a href="#">similar to vomeronasal 2, receptor, 14 isoform 2</a>  |                           |  |           |     |    |     |
| 7 | 257 | <a href="#">similar to vomeronasal 2, receptor, 15 isoform 3</a>  | <a href="#">LOC628326</a> |  | 10413694  | 390 | 11 | 380 |
|   |     | <a href="#">similar to vomeronasal 2, receptor, 15 isoform 2</a>  |                           |  |           |     |    |     |

|   |     |                                                                              |                           |   |           |     |    |     |
|---|-----|------------------------------------------------------------------------------|---------------------------|---|-----------|-----|----|-----|
| 7 | 258 | <a href="#">similar to putative pheromone receptor isoform 1</a>             | <a href="#">LOC24394</a>  | I | 10526833  | 387 | 11 | 377 |
| 7 | 259 | <a href="#">similar to putative pheromone receptor isoform 1</a>             | <a href="#">5</a>         | I | 10570853  | 388 | 11 | 378 |
| 7 | 260 | <a href="#">similar to vomeronasal 2, receptor, 15 isoform 1</a>             | <a href="#">LOC628326</a> | I | 10684412  | 391 | 11 | 381 |
|   |     | <a href="#">similar to vomeronasal 2, receptor, 15 isoform 2</a>             |                           | I |           |     |    |     |
| 7 | 261 | <a href="#">phospholipase A2, group IVC (cytosolic, calcium-independent)</a> | <a href="#">pla2g4c</a>   | E | 13927170  | 247 | 16 | 237 |
| 7 | 262 | <a href="#">kallikrein 26</a>                                                | <a href="#">Klk1b26</a>   | E | 51269907  | 561 | 25 | 551 |
| 7 | 263 | <a href="#">leucine zipper protein 2</a>                                     | <a href="#">Luzp2</a>     | I | 62318828  | 361 | 24 | 351 |
| 7 | 264 | <a href="#">gamma-aminobutyric acid (GABA-A) receptor, subunit gamma 3</a>   | <a href="#">Gabrb3</a>    | I | 64570061  | 410 | 12 | 400 |
| 7 | 265 | <a href="#">ubiquitin protein ligase E3A isoform 2</a>                       | <a href="#">Ube3a</a>     | E | 66539644  | 381 | 23 | 371 |
|   |     | <a href="#">ubiquitin protein ligase E3A isoform 3</a>                       |                           | I |           |     |    |     |
| 7 | 266 | <a href="#">multiple C2 domains, transmembrane 2</a>                         | <a href="#">Mctp2</a>     | I | 79231749  | 515 | 27 | 505 |
| 7 | 267 | <a href="#">multiple C2 domains, transmembrane 2</a>                         | <a href="#">Mctp2</a>     | I | 79317556  | 360 | 16 | 350 |
| 7 | 268 | <a href="#">solute carrier organic anion transporter family, member 3...</a> | <a href="#">Slco3a1</a>   | I | 81551764  | 272 | 18 | 262 |
|   |     | <a href="#">solute carrier organic anion transporter family, member 3...</a> |                           |   |           |     |    |     |
| 7 | 269 | <a href="#">cytoplasmic polyadenylation element binding protein 1</a>        |                           | I | 88534843  | 379 | 6  | 369 |
| 7 | 270 | <a href="#">cytoplasmic polyadenylation element binding protein 1</a>        | <a href="#">Cpeb1</a>     | I | 88564601  | 418 | 12 | 408 |
| 7 | 271 | <a href="#">carboxypeptidase 4, cytosolic</a>                                | <a href="#">Agbl1</a>     | I | 83860962  | 420 | 9  | 410 |
| 7 | 272 | <a href="#">WAS protein homology region 2 domain containing 1</a>            | <a href="#">Whamm</a>     | I | 88720002  | 478 | 16 | 468 |
| 7 | 273 | <a href="#">hypothetical protein LOC70178</a>                                |                           | I | 91274779  | 390 | 9  | 380 |
| 7 | 274 | <a href="#">similar to putative pheromone receptor</a>                       | <a href="#">LOC272377</a> | I | 93309701  | 526 | 10 | 516 |
| 7 | 275 | <a href="#">similar to putative pheromone receptor</a>                       | <a href="#">LOC272377</a> | I | 93944986  | 375 | 23 | 365 |
| 7 | 276 | <a href="#">glutamate receptor, metabotropic 5</a>                           | <a href="#">Grm5</a>      | I | 95031289  | 476 | 19 | 466 |
| 7 | 277 | <a href="#">spondin 1, (f-spondin) extracellular matrix protein</a>          | <a href="#">Spon1</a>     | I | 120915658 | 315 | 9  | 305 |
| 7 | 278 | <a href="#">xylosyltransferase 1</a>                                         | <a href="#">Xylt1</a>     | I | 124625598 | 337 | 16 | 327 |
| 7 | 279 | <a href="#">ADAMTS-like 3</a>                                                | <a href="#">Adamtsl3</a>  | I | 89504603  | 409 | 18 | 399 |
| 7 | 280 | <a href="#">NADPH oxidase 4</a>                                              | <a href="#">Nox4</a>      | I | 94461886  | 416 | 21 | 406 |
| 7 | 281 | <a href="#">chapsyn-110</a>                                                  | <a href="#">LOC233498</a> | I | 98247576  | 368 | 9  | 358 |
| 7 | 282 | <a href="#">chapsyn-110</a>                                                  | <a href="#">LOC233498</a> | I | 98784548  | 218 | 7  | 208 |
| 7 | 283 | <a href="#">glycerophosphodiester phosphodiesterase domain containing 4</a>  | <a href="#">Gpd4</a>      | E | 105148163 | 365 | 19 | 355 |
| 7 | 284 | <a href="#">olfactory receptor 485</a>                                       | <a href="#">Olfr485</a>   | E | 115303056 | 359 | 24 | 349 |
| 7 | 285 | <a href="#">olfactory receptor 488</a>                                       | <a href="#">Olfr485</a>   | E | 115399338 | 367 | 24 | 357 |
| 7 | 286 | <a href="#">ATP-binding cassette transporter sub-family A member 16</a>      | <a href="#">Abca16</a>    | I | 127599420 | 319 | 18 | 309 |
| 7 | 287 | <a href="#">voltage-dependent calcium channel gamma-3 subunit</a>            | <a href="#">Cacng3</a>    | I | 129860461 | 210 | 12 | 200 |
| 7 | 288 | <a href="#">sodium/glucose cotransporter KST1</a>                            | <a href="#">Slc5a11</a>   | I | 130415134 | 415 | 13 | 405 |
| 7 | 289 | <a href="#">nadrin</a>                                                       | <a href="#">Arhgap17</a>  | I | 130504948 | 384 | 19 | 374 |
| 7 | 290 | <a href="#">protein phosphatase 2A, regulatory subunit B, delta isoform</a>  | <a href="#">Ppp2r2d</a>   | I | 146049738 | 407 | 20 | 397 |

|   |     |                                                                           |                           |   |           |     |    |     |
|---|-----|---------------------------------------------------------------------------|---------------------------|---|-----------|-----|----|-----|
| 7 | 291 | <a href="#">deformed epidermal autoregulatory factor 1</a>                | <a href="#">Deaf1</a>     | I | 148502626 | 566 | 9  | 556 |
| 8 | 292 | <a href="#">tubulin, gamma complex associated protein 3</a>               | <a href="#">Tubgcp3</a>   | I | 12618341  | 408 | 28 | 398 |
| 8 | 293 | <a href="#">CUB and Sushi multiple domains 1</a>                          | <a href="#">Csmd1</a>     | I | 16285426  | 156 | 29 | 146 |
| 8 | 294 | <a href="#">CUB and Sushi multiple domains 1</a>                          | <a href="#">Csmd1</a>     | I | 17025707  | 332 | 34 | 322 |
| 8 | 295 | <a href="#">hypothetical protein</a>                                      |                           | I | 18401736  | 460 | 17 | 450 |
| 8 | 296 | <a href="#">transmembrane phosphatase with tensin homology</a>            | <a href="#">Tpte</a>      | I | 23418114  | 212 | 22 | 202 |
| 8 | 297 | <a href="#">RNA binding protein gene with multiple splicing isoform 2</a> | <a href="#">Rbpms</a>     | I | 34993344  | 354 | 24 | 344 |
|   |     | <a href="#">RNA binding protein gene with multiple splicing isoform 1</a> |                           |   |           |     |    |     |
| 8 | 298 | <a href="#">hypothetical protein LOC212326</a>                            | <a href="#">Fam149a</a>   | I | 46457405  | 490 | 7  | 480 |
| 8 | 299 | <a href="#">odd Oz/ten-m homolog 3</a>                                    | <a href="#">Odz3</a>      | I | 49599925  | 353 | 11 | 343 |
| 8 | 300 | <a href="#">annexin A10</a>                                               | <a href="#">Anxa10</a>    | I | 63031300  | 402 | 28 | 392 |
| 8 | 301 | <a href="#">membrane-associated ring finger (C3HC4) 1</a>                 | <a href="#">March1</a>    | I | 67400091  | 360 | 23 | 350 |
| 8 | 302 | <a href="#">mucoepidermoid carcinoma translocated 1</a>                   | <a href="#">Crtc1</a>     | I | 71409294  | 229 | 19 | 219 |
| 8 | 303 | <a href="#">splicing factor 4</a>                                         | <a href="#">Sf4</a>       | I | 71039197  | 369 | 8  | 359 |
| 8 | 304 | <a href="#">NYD-SP14 protein</a>                                          | <a href="#">LOC234470</a> | I | 79353657  | 364 | 8  | 354 |
| 8 | 305 | <a href="#">hypothetical protein LOC622675</a>                            |                           | I | 80049056  | 352 | 29 | 342 |
| 8 | 306 | <a href="#">ring finger protein 150</a>                                   | <a href="#">Rnf150</a>    | I | 83902135  | 374 | 16 | 364 |
| 8 | 307 | <a href="#">cadherin 8 isoform 1</a>                                      | <a href="#">Cdh8</a>      | I | 100084256 | 349 | 20 | 339 |
|   |     | <a href="#">cadherin 8 isoform 2</a>                                      |                           | I |           |     |    |     |
| 8 | 308 | <a href="#">cadherin 8 isoform 1</a>                                      | <a href="#">Cdh8</a>      | I | 100267826 | 407 | 25 | 397 |
| 8 |     | <a href="#">cadherin 8 isoform 2</a>                                      |                           | I |           |     |    |     |
| 8 | 309 | <a href="#">BDG-29 protein</a>                                            | <a href="#">Zcchc14</a>   | I | 122618819 | 418 | 15 | 408 |
| 8 | 310 | <a href="#">pecanex-like 2 isoform 2</a>                                  | <a href="#">Pcnxl2</a>    | I | 126815152 | 406 | 13 | 396 |
| 8 | 311 | <a href="#">neuropilin 1</a>                                              | <a href="#">Nrp1</a>      | I | 129478293 | 406 | 9  | 396 |
| 8 | 312 | <a href="#">cadherin 8 isoform 1</a>                                      | <a href="#">Cdh8</a>      | I | 100024987 | 373 | 9  | 363 |
| 8 |     | <a href="#">cadherin 8 isoform 2</a>                                      |                           | I |           |     |    |     |
| 8 | 313 | <a href="#">ring finger and WD repeat domain 3</a>                        | <a href="#">Rfwd3</a>     | I | 112283302 | 403 | 13 | 393 |
| 8 | 314 | <a href="#">WW-domain oxidoreductase</a>                                  | <a href="#">Wwox</a>      | I | 116256735 | 346 | 19 | 336 |
| 8 | 315 | <a href="#">polycystin 1-like 2</a>                                       | <a href="#">Pkd1l2</a>    | I | 118006300 | 385 | 16 | 375 |
| 8 | 316 | <a href="#">cadherin 13</a>                                               | <a href="#">Cdh13</a>     | I | 119983673 | 431 | 30 | 421 |
| 9 | 317 | <a href="#">glutamate receptor, ionotropic, AMPA4 (alpha 4)</a>           | <a href="#">Gria4</a>     | I | 4721178   | 167 | 27 | 157 |
| 9 | 318 | <a href="#">dynein, cytoplasmic, heavy chain 2</a>                        | <a href="#">Dync2h1</a>   | I | 6994726   | 170 | 9  | 160 |
| 9 | 319 | <a href="#">dynein, cytoplasmic, heavy chain 2</a>                        | <a href="#">Dync2h1</a>   | I | 7137686   | 379 | 23 | 369 |
| 9 | 320 | <a href="#">hypothetical protein LOC234915</a>                            | <a href="#">AK129341</a>  | I | 8132266   | 233 | 24 | 223 |
| 9 | 321 | <a href="#">contactin 5</a>                                               | <a href="#">Cntn5</a>     | I | 10125879  | 515 | 31 | 505 |
| 9 | 322 | <a href="#">glutamate receptor, ionotropic, AMPA4 (alpha 4)</a>           | <a href="#">Gria4</a>     | E | 4455699   | 402 | 12 | 392 |
| 9 | 323 | <a href="#">contactin 5</a>                                               | <a href="#">Cntn5</a>     | I | 9859961   | 556 | 16 | 546 |



|    |     |                                                                              |                          |   |           |     |    |     |
|----|-----|------------------------------------------------------------------------------|--------------------------|---|-----------|-----|----|-----|
| 9  | 324 | <a href="#">_piwi-like 4</a>                                                 | <a href="#">Piwil4</a>   | I | 14525114  | 399 | 30 | 389 |
| 9  | 325 | <a href="#">crossveinless 2</a>                                              | <a href="#">Bmper</a>    | I | 23193207  | 412 | 23 | 402 |
| 9  | 326 | <a href="#">_dpy-19-like 1</a>                                               | <a href="#">Dpy1911</a>  | E | 24218458  | 350 | 26 | 340 |
| 9  | 327 | <a href="#">_membrane protein mKirre</a>                                     | <a href="#">Kirrel3</a>  | I | 34725113  | 335 | 12 | 325 |
| 9  | 328 | <a href="#">hypothetical protein LOC235184</a>                               | <a href="#">BC024479</a> | I | 37307378  | 363 | 7  | 353 |
| 9  | 329 | <a href="#">_ferredoxin 1</a>                                                | <a href="#">Fdxacb1</a>  | I | 51756143  | 379 | 13 | 369 |
| 9  | 330 | <a href="#">_myotubularin related protein 2</a>                              | <a href="#">Mtmr2</a>    | E | 13599378  | 465 | 17 | 455 |
| 9  | 331 | <a href="#">embryonic development factor 1</a>                               | <a href="#">Cwc15</a>    | I | 14309031  | 317 | 9  | 307 |
| 9  | 332 | <a href="#">FAT tumor suppressor homolog 3</a>                               | <a href="#">Fat3</a>     | I | 15999397  | 579 | 7  | 569 |
| 9  | 333 | <a href="#">mucin 16</a>                                                     | <a href="#">Muc16</a>    | E | 18366682  | 384 | 10 | 374 |
| 9  | 334 | <a href="#">_HERPUD family member 2</a>                                      | <a href="#">Herpud2</a>  | I | 24938159  | 348 | 22 | 338 |
| 9  | 335 | <a href="#">_opioid binding protein/cell adhesion molecule-like</a>          | <a href="#">Opcml</a>    | I | 27921034  | 502 | 24 | 492 |
| 9  | 336 | <a href="#">neurotrimin</a>                                                  | <a href="#">Ntm</a>      | I | 29416172  | 419 | 17 | 409 |
| 9  | 337 | <a href="#">pseudouridine synthase 3</a>                                     | <a href="#">Pus3</a>     | E | 35373551  | 238 | 23 | 228 |
| 9  | 338 | <a href="#">myeloid/lymphoid or mixed-lineage leukemia 1</a>                 | <a href="#">Mll1</a>     | I | 44659225  | 373 | 30 | 363 |
| 9  | 339 | <a href="#">_Dmx-like 2</a>                                                  | <a href="#">Dmxl2</a>    | I | 54304231  | 405 | 13 | 395 |
| 9  | 340 | <a href="#">_NADPH cytochrome B5 oxidoreductase</a>                          | <a href="#">Cyb5r4</a>   | I | 86936557  | 392 | 26 | 382 |
| 9  | 341 | <a href="#">calsyntenin 2</a>                                                | <a href="#">Clstn2</a>   | I | 97371105  | 346 | 9  | 336 |
| 9  | 342 | <a href="#">_stromal antigen 1</a>                                           | <a href="#">Stag1</a>    | I | 100735510 | 161 | 17 | 151 |
| 9  | 343 | <a href="#">pleckstrin homology domain interacting protein</a>               | <a href="#">Phip</a>     | I | 82841400  | 374 | 31 | 364 |
| 9  | 344 | <a href="#">RAS protein-specific guanine nucleotide-releasing factor ...</a> | <a href="#">Rasgrf1</a>  | I | 89887453  | 229 | 22 | 219 |
| 9  | 345 | <a href="#">_stromal antigen 1</a>                                           | <a href="#">Stag1</a>    | E | 100791155 | 389 | 23 | 379 |
| 9  | 346 | <a href="#">copine IV</a>                                                    | <a href="#">Cpne4</a>    | I | 104638130 | 347 | 15 | 337 |
| 9  | 347 | <a href="#">copine IV</a>                                                    | <a href="#">Cpne4</a>    | I | 104908676 | 501 | 7  | 491 |
| 9  | 348 | <a href="#">centrosomal protein 63</a>                                       | <a href="#">Cep63</a>    | E | 102517200 | 378 | 23 | 368 |
| 9  | 349 | <a href="#">copine IV</a>                                                    | <a href="#">Cpne4</a>    | I | 104742052 | 423 | 29 | 413 |
| 9  | 350 | <a href="#">F-box domain containing protein</a>                              | <a href="#">Fbxw21</a>   | I | 109055893 | 292 | 28 | 282 |
| 9  | 351 | <a href="#">5-azacytidine induced 2 isoform a</a>                            | <a href="#">Azi2</a>     | E | 117968575 | 291 | 20 | 281 |
| 9  | 352 | <a href="#">dynein, cytoplasmic, light intermediate chain 1</a>              | <a href="#">Dync1li1</a> | I | 114630809 | 472 | 31 | 462 |
| 9  | 353 | <a href="#">integrin alpha 9</a>                                             | <a href="#">Itga9</a>    | I | 118609036 | 366 | 27 | 356 |
| 9  | 354 | <a href="#">CTD (carboxy-terminal domain, RNA polymerase II, polypept...</a> | <a href="#">Ctdspl</a>   | I | 118915950 | 585 | 12 | 575 |
| 9  | 355 | <a href="#">hypoxia induced gene 1</a>                                       | <a href="#">Higd1a</a>   | I | 121760033 | 394 | 8  | 384 |
| 10 | 356 | <a href="#">_synaptic nuclear envelope 1 isoform 1</a>                       | <a href="#">Syne1</a>    | I | 4813346   | 314 | 9  | 304 |
| 10 | 357 | <a href="#">_glycine receptor, alpha 1 subunit</a>                           | <a href="#">Glr1</a>     | I | 28221913  | 370 | 27 | 360 |
| 10 | 358 | <a href="#">glutamate receptor, ionotropic, AMPA1 (alpha 1)</a>              | <a href="#">Gria1</a>    | I | 29671740  | 591 | 19 | 581 |
| 10 | 359 | <a href="#">nuclear receptor co-repressor 1</a>                              | <a href="#">Ncor1</a>    | I | 34977996  | 380 | 12 | 370 |
| 10 | 360 | <a href="#">myosin, heavy polypeptide 2, skeletal muscle, adult</a>          | <a href="#">Myh2</a>     | E | 39811909  | 621 | 29 | 611 |

|    |     |                                                                              |                           |   |           |     |    |     |
|----|-----|------------------------------------------------------------------------------|---------------------------|---|-----------|-----|----|-----|
| 10 | 361 | <a href="#">dynein, axonemal, heavy chain 2</a>                              | <a href="#">Dnahc2</a>    | E | 42092055  | 363 | 20 | 353 |
| 10 | 362 | <a href="#">amiloride-sensitive cation channel 1, neuronal isoform b</a>     | <a href="#">Accn1</a>     | I | 53669592  | 273 | 18 | 263 |
|    |     | <a href="#">amiloride-sensitive cation channel 1, neuronal isoform a</a>     |                           |   |           |     |    |     |
| 10 | 363 | <a href="#">amiloride-sensitive cation channel 1, neuronal isoform b</a>     | <a href="#">Accn1</a>     | I | 54454176  | 495 | 18 | 485 |
| 10 | 364 | <a href="#">fatty acid binding protein 6, ileal (gastrotropin)</a>           | <a href="#">Fabp6</a>     | I | 16211289  | 383 | 31 | 373 |
| 10 | 365 | <a href="#">sarcoglycan, delta (dystrophin-associated glycoprotein)</a>      | <a href="#">Sgcd</a>      | I | 19962600  | 275 | 18 | 265 |
| 10 | 366 | <a href="#">LYR motif containing 7</a>                                       | <a href="#">Lym7</a>      | I | 27457394  | 436 | 11 | 426 |
| 10 | 367 | <a href="#">folliculin</a>                                                   | <a href="#">Flcn</a>      | I | 32414703  | 343 | 19 | 333 |
| 10 | 368 | <a href="#">nuclear receptor co-repressor 1</a>                              | <a href="#">Ncor1</a>     | I | 34971787  | 444 | 28 | 434 |
| 10 | 369 | <a href="#">phosphatidylinositol glycan anchor biosynthesis, class L</a>     | <a href="#">Pigl</a>      | I | 35119125  | 387 | 13 | 377 |
| 10 | 370 | <a href="#">dynein, axonemal, heavy chain 9 isoform 1</a>                    | <a href="#">LOC195118</a> | I | 38568011  | 384 | 27 | 374 |
| 10 | 371 | <a href="#">centaurin, beta 1</a>                                            | <a href="#">Acap1</a>     | I | 42502533  | 392 | 29 | 382 |
| 10 | 372 | <a href="#">regulatory factor X domain containing 1</a>                      | <a href="#">Rfx6</a>      | I | 51441453  | 387 | 24 | 377 |
| 10 | 373 | <a href="#">solute carrier family 35, member F1</a>                          | <a href="#">Slc35f1</a>   | I | 52570121  | 456 | 15 | 446 |
| 10 | 374 | <a href="#">_hect domain and RLD 4</a>                                       | <a href="#">Herc4</a>     | I | 62767779  | 618 | 9  | 608 |
| 10 | 375 | <a href="#">_carbohydrate sulfotransferase 11</a>                            | <a href="#">Chst11</a>    | I | 82615769  | 372 | 22 | 362 |
| 10 | 376 | <a href="#">transmembrane protein 16D</a>                                    | <a href="#">Ano4</a>      | I | 88494472  | 364 | 27 | 354 |
| 10 | 377 | <a href="#">hypothetical protein</a>                                         |                           | E | 97808432  | 475 | 28 | 465 |
| 10 | 378 | <a href="#">transmembrane and tetratricopeptide repeat containing 2</a>      | <a href="#">Tmtc2</a>     | I | 104965287 | 305 | 18 | 295 |
| 10 | 379 | <a href="#">myopalladin</a>                                                  | <a href="#">Mypn</a>      | I | 62594512  | 391 | 16 | 381 |
| 10 | 380 | <a href="#">catenin (cadherin associated protein), alpha 3</a>               | <a href="#">Ctnna3</a>    | I | 63458640  | 350 | 18 | 340 |
|    |     | <a href="#">_leucine-rich repeat transmembrane neuronal 3 protein</a>        |                           |   |           |     |    |     |
| 10 | 381 | <a href="#">catenin (cadherin associated protein), alpha 3</a>               | <a href="#">Ctnna3</a>    | I | 63938665  | 391 | 19 | 381 |
| 10 | 382 | <a href="#">_catenin (cadherin associated protein), alpha 3</a>              | <a href="#">Ctnna3</a>    | I | 64118870  | 161 | 7  | 151 |
| 10 | 383 | <a href="#">ilvB (bacterial acetolactate synthase)-like</a>                  | <a href="#">Ilvbl</a>     | I | 78042442  | 264 | 20 | 254 |
| 10 | 384 | <a href="#">stabilin-2</a>                                                   | <a href="#">Stab2</a>     | I | 86374031  | 495 | 25 | 485 |
| 10 | 385 | <a href="#">neural precursor cell expressed, developmentally down-reg...</a> | <a href="#">Nedd1</a>     | I | 92167626  | 525 | 9  | 515 |
| 10 | 386 | <a href="#">hypothetical protein LOC380654</a>                               | <a href="#">30485B16F</a> | I | 92461527  | 345 | 34 | 335 |
| 10 | 387 | <a href="#">hypothetical protein</a>                                         |                           | I | 98920543  | 445 | 9  | 435 |
| 10 | 388 | <a href="#">eucine-rich repeats and IQ motif containing 1</a>                | <a href="#">Lrriq1</a>    | I | 102588972 | 421 | 20 | 411 |
| 10 | 389 | <a href="#">_hypothetical protein</a>                                        |                           | I | 109757886 | 277 | 9  | 267 |
| 10 | 390 | <a href="#">cytokine induced protein 29 kDa</a>                              |                           | I | 128260650 | 362 | 9  | 352 |
| 11 | 391 | <a href="#">zinc and ring finger 3</a>                                       | <a href="#">Znrf3</a>     | I | 5200663   | 284 | 17 | 274 |
| 11 | 392 | <a href="#">_hypothetical protein LOC67592</a>                               | <a href="#">30524B15F</a> | E | 31876641  | 335 | 15 | 325 |
| 11 | 393 | <a href="#">SH3 and PX domains 2B</a>                                        | <a href="#">Sh3pxd2b</a>  | I | 32306480  | 607 | 8  | 597 |
| 11 | 394 | <a href="#">hypothetical protein LOC73307</a>                                | <a href="#">00046C09F</a> | E | 14477881  | 456 | 8  | 446 |
| 11 | 395 | <a href="#">_reticulon 4 isoform A</a>                                       | <a href="#">Rtn4</a>      | I | 29614581  | 186 | 33 | 176 |



|    |     |                                                                              |                                |  |   |           |     |    |     |
|----|-----|------------------------------------------------------------------------------|--------------------------------|--|---|-----------|-----|----|-----|
|    |     | <a href="#">reticulon 4 isoform B2</a>                                       |                                |  |   |           |     |    |     |
| 11 | 396 | <a href="#">hypothetical protein</a>                                         |                                |  | I | 30163988  | 401 | 27 | 391 |
| 11 | 397 | <a href="#">cytoplasmic polyadenylation element binding protein 4</a>        | <a href="#">Cpeb4</a>          |  | I | 31819312  | 329 | 8  | 319 |
| 11 | 398 | <a href="#">odd Oz/ten-m homolog 2 isoform 1</a>                             | <a href="#">Odz2</a>           |  | I | 36696934  | 482 | 26 | 472 |
| 11 | 399 | <a href="#">clathrin interactor 1</a>                                        | <a href="#">Clint1</a>         |  | I | 45688200  | 487 | 7  | 477 |
| 11 | 400 | <a href="#">FMS-like tyrosine kinase 4</a>                                   | <a href="#">Flt4</a>           |  | E | 49439098  | 481 | 14 | 471 |
| 11 | 401 | <a href="#">la related protein</a>                                           | <a href="#">l related prot</a> |  | E | 57868815  | 360 | 8  | 350 |
| 11 | 402 | <a href="#">rabaptin, RAB GTPase binding effector protein 1</a>              | <a href="#">Rabep1</a>         |  | I | 70713253  | 455 | 12 | 445 |
| 11 | 403 | <a href="#">olfactory receptor 394</a>                                       | <a href="#">Olfr394</a>        |  | I | 73700657  | 293 | 18 | 283 |
| 11 | 404 | <a href="#">myosin ID</a>                                                    | <a href="#">Myo1d</a>          |  | I | 80403091  | 452 | 8  | 442 |
| 11 | 405 | <a href="#">hypothetical protein LOC103743</a>                               |                                |  | I | 80626735  | 447 | 29 | 437 |
| 11 | 406 | <a href="#">hypothetical protein LOC74133</a>                                |                                |  | I | 86896273  | 360 | 28 | 350 |
| 11 | 407 | <a href="#">pantothenate kinase 3</a>                                        | <a href="#">Pank3</a>          |  | I | 35594396  | 261 | 20 | 251 |
| 11 | 408 | <a href="#">folliculin interacting protein 1</a>                             | <a href="#">Fnip1</a>          |  | I | 54260129  | 441 | 23 | 431 |
| 11 | 409 | <a href="#">myocardin isoform A</a>                                          | <a href="#">Myocd</a>          |  | I | 65023915  | 374 | 7  | 364 |
|    |     | <a href="#">myocardin isoform B</a>                                          |                                |  |   |           |     |    |     |
| 11 | 410 | <a href="#">breast cancer 1</a>                                              | <a href="#">Brca1</a>          |  | I | 101368730 | 339 | 7  | 329 |
| 11 | 411 | <a href="#">SMAD specific E3 ubiquitin protein ligase 2</a>                  | <a href="#">Smurf2</a>         |  | I | 106696067 | 349 | 11 | 339 |
| 11 | 412 | <a href="#">integrin alpha 3</a>                                             | <a href="#">Itga3</a>          |  | E | 94916870  | 404 | 8  | 394 |
| 11 | 413 | <a href="#">similar to potassium voltage-gated channel, subfamily H, ...</a> |                                |  | I | 100607335 | 294 | 26 | 284 |
| 11 | 414 | <a href="#">hypothetical protein</a>                                         |                                |  | I | 104663893 | 314 | 13 | 304 |
| 11 | 415 | <a href="#">solute carrier family 39 (metal ion transporter), member 11</a>  | <a href="#">Slc39a11</a>       |  | I | 113307883 | 439 | 27 | 429 |
| 12 | 416 | <a href="#">hypothetical protein</a>                                         |                                |  | I | 20969580  | 360 | 11 | 350 |
| 12 | 417 | <a href="#">O-acyltransferase (membrane bound) domain containing 2 is...</a> | <a href="#">Mboat2</a>         |  | I | 25619556  | 412 | 9  | 402 |
|    |     | <a href="#">O-acyltransferase (membrane bound) domain containing 2 is...</a> |                                |  |   |           |     |    |     |
| 12 | 418 | <a href="#">dedicator of cytokinesis 4</a>                                   | <a href="#">Dock4</a>          |  | I | 41382406  | 354 | 31 | 344 |
| 12 | 419 | <a href="#">syntrophin, gamma 2</a>                                          | <a href="#">Sntg2</a>          |  | I | 30932302  | 500 | 21 | 490 |
| 12 | 420 | <a href="#">syntrophin, gamma 2</a>                                          | <a href="#">Sntg2</a>          |  | I | 30939782  | 420 | 24 | 410 |
| 12 | 421 | <a href="#">syntrophin, gamma 2</a>                                          | <a href="#">Sntg2</a>          |  | I | 31015555  | 457 | 27 | 447 |
| 12 | 422 | <a href="#">striatin, calmodulin binding protein 3</a>                       | <a href="#">Strn3</a>          |  | I | 52378290  | 400 | 12 | 390 |
| 12 | 423 | <a href="#">A kinase (PRKA) anchor protein 6</a>                             | <a href="#">Akap6</a>          |  | I | 53613560  | 350 | 15 | 340 |
| 12 | 424 | <a href="#">solute carrier family 25 (mitochondrial oxodicarboxylate ...</a> | <a href="#">Slc25a21</a>       |  | I | 57634717  | 425 | 28 | 415 |
| 12 | 425 | <a href="#">MAM domain containing glycosylphosphatidylinositol anchor 2</a>  | <a href="#">Mdga2</a>          |  | I | 67397499  | 436 | 13 | 426 |
| 12 | 426 | <a href="#">ninein isoform 1</a>                                             | <a href="#">Nin</a>            |  | I | 70782673  | 350 | 26 | 340 |
|    |     | <a href="#">ninein isoform 2</a>                                             |                                |  |   |           |     |    |     |
| 12 | 427 | <a href="#">ras homolog gene family, member J</a>                            | <a href="#">Rhoj</a>           |  | I | 76081187  | 367 | 27 | 357 |
| 12 | 428 | <a href="#">ras homolog gene family, member J</a>                            | <a href="#">Rhoj</a>           |  | I | 76087383  | 436 | 9  | 426 |

|    |     |                                                                              |                            |   |           |     |    |     |
|----|-----|------------------------------------------------------------------------------|----------------------------|---|-----------|-----|----|-----|
| 12 | 429 | <a href="#">MAM domain containing glycosylphosphatidylinositol anchor 2</a>  | <a href="#">Mdga2</a>      | I | 67384425  | 323 | 8  | 313 |
| 12 | 430 | <a href="#">MAM domain containing glycosylphosphatidylinositol anchor 2</a>  | <a href="#">Mdga2</a>      | I | 67462773  | 392 | 34 | 382 |
| 12 | 431 | <a href="#">tripartite motif protein 9</a>                                   | <a href="#">Trim9</a>      | I | 71096806  | 278 | 17 | 268 |
| 12 | 432 | <a href="#">estrogen receptor beta isoform 2</a>                             | <a href="#">Esr2</a>       | E | 76909527  | 457 | 22 | 447 |
|    |     | <a href="#">estrogen receptor beta isoform 1</a>                             |                            |   |           |     |    |     |
| 12 | 433 | <a href="#">hypothetical protein LOC75216</a>                                | <a href="#">J30534B04F</a> | I | 91995970  | 557 | 19 | 547 |
| 12 | 434 | <a href="#">ribosomal protein S6 kinase, polypeptide 5</a>                   | <a href="#">Rps6ka5</a>    | I | 101518778 | 348 | 11 | 338 |
| 12 | 435 | <a href="#">hypothetical protein LOC271036</a>                               |                            | I | 102445540 | 392 | 11 | 382 |
| 12 | 436 | <a href="#">hypothetical protein LOC77878</a>                                | <a href="#">J30440G07F</a> | I | 111896451 | 267 | 14 | 257 |
| 12 | 437 | <a href="#">chr2 synaptotagmin</a>                                           | <a href="#">Esy2</a>       | I | 117207776 | 369 | 24 | 359 |
| 12 | 438 | <a href="#">neurexin III</a>                                                 | <a href="#">Nrxn3</a>      | I | 90770341  | 344 | 14 | 334 |
| 12 | 439 | <a href="#">Ena-vasodilator stimulated phosphoprotein</a>                    | <a href="#">Evl</a>        | I | 109477278 | 531 | 33 | 521 |
| 13 | 440 | <a href="#">adenosine deaminase, RNA-specific, B2</a>                        | <a href="#">Adarb2</a>     | I | 8631908   | 374 | 22 | 364 |
| 13 | 441 | <a href="#">phenylalanine-tRNA synthetase 2 (mitochondrial) isoform 1</a>    | <a href="#">Fars2</a>      | I | 36313091  | 441 | 12 | 431 |
| 13 | 442 | <a href="#">guanine nucleotide binding protein (G protein), gamma 4 s...</a> | <a href="#">Gng4</a>       | I | 13903525  | 388 | 33 | 378 |
| 13 | 443 | <a href="#">cell division cycle 2-like 5 (cholinesterase-related cell...</a> | <a href="#">Cdk13</a>      | I | 17814566  | 343 | 6  | 333 |
| 13 | 444 | <a href="#">vacuolar protein sorting 41</a>                                  | <a href="#">Vps41</a>      | I | 18811847  | 369 | 12 | 359 |
| 13 | 445 | <a href="#">hypothetical protein LOC73102</a>                                |                            | I | 34279372  | 259 | 6  | 249 |
| 13 | 446 | <a href="#">transcription factor AP-2, alpha</a>                             | <a href="#">Tcfap2a</a>    | I | 40822334  | 411 | 19 | 401 |
| 13 | 447 | <a href="#">AU RNA-binding enoyl-coenzyme A hydratase</a>                    | <a href="#">Auh</a>        | I | 52932205  | 360 | 18 | 350 |
| 13 | 448 | <a href="#">human immunodeficiency virus type I enhancer binding prot...</a> | <a href="#">Hivep1</a>     | I | 42263930  | 551 | 12 | 541 |
| 13 | 449 | <a href="#">dystrobrevin binding protein 1</a>                               | <a href="#">Dtnbp1</a>     | I | 45055105  | 305 | 31 | 295 |
| 13 | 450 | <a href="#">kinesin family member 13A</a>                                    | <a href="#">Kif13a</a>     | I | 46957429  | 510 | 23 | 500 |
| 13 | 451 | <a href="#">G kinase anchoring protein 1</a>                                 | <a href="#">Gkap1</a>      | I | 58338665  | 371 | 12 | 361 |
| 13 | 452 | <a href="#">Fanconi anemia, complementation group C</a>                      | <a href="#">Fance</a>      | I | 63429915  | 239 | 21 | 229 |
|    |     | <a href="#">Fanconi anemia, complementation group C</a>                      |                            |   |           |     |    |     |
| 13 | 453 | <a href="#">adenylate cyclase 2</a>                                          | <a href="#">Adcy2</a>      | I | 68766375  | 306 | 26 | 296 |
| 13 | 454 | <a href="#">X-ray repair complementing defective repair in Chinese ha...</a> | <a href="#">Xrcc4</a>      | I | 90141752  | 492 | 26 | 482 |
| 13 | 455 | <a href="#">death associated protein kinase 1</a>                            | <a href="#">Dapk1</a>      | I | 60857487  | 401 | 14 | 391 |
|    |     | <a href="#">death associated protein kinase 1</a>                            |                            |   |           |     |    |     |
| 13 | 456 | <a href="#">zinc finger protein 712 isoform 1</a>                            | <a href="#">Zfp712</a>     | E | 67141562  | 423 | 33 | 413 |
| 13 | 457 | <a href="#">elongation factor RNA polymerase II 2</a>                        | <a href="#">Eif2</a>       | I | 75898067  | 433 | 18 | 423 |
| 13 | 458 | <a href="#">hypothetical protein LOC218343</a>                               |                            | E | 76282097  | 404 | 28 | 394 |
| 13 | 459 | <a href="#">developmental endothelial locus-1 isoform a</a>                  | <a href="#">Edil3</a>      | I | 89194451  | 288 | 25 | 278 |
|    |     | <a href="#">developmental endothelial locus-1 isoform b</a>                  |                            |   |           |     |    |     |
| 13 | 460 | <a href="#">RAS protein-specific guanine nucleotide-releasing factor 2</a>   | <a href="#">Rasgrf2</a>    | I | 92042923  | 543 | 12 | 533 |
| 13 | 461 | <a href="#">a disintegrin-like and metalloprotease (repolysin type) ...</a>  | <a href="#">Adamts6</a>    | I | 105141649 | 354 | 26 | 344 |

|    |     |                                                                                 |                          |   |           |     |    |     |
|----|-----|---------------------------------------------------------------------------------|--------------------------|---|-----------|-----|----|-----|
| 13 | 462 | <a href="#">hypothetical protein LOC73942</a>                                   | <a href="#">Fam151b</a>  | I | 93221039  | 352 | 8  | 342 |
| 14 | 463 | <a href="#">fragile histidine triad</a>                                         | <a href="#">Fhit</a>     | I | 10778523  | 404 | 18 | 394 |
| 14 | 464 | <a href="#">fragile histidine triad</a>                                         | <a href="#">Fhit</a>     | I | 10739437  | 325 | 23 | 315 |
| 14 | 465 | <a href="#">fragile histidine triad</a>                                         | <a href="#">Fhit</a>     | I | 11055378  | 377 | 29 | 367 |
| 14 | 466 | <a href="#">Ca&lt;2+&gt;dependent activator protein for secretion isoform 2</a> | <a href="#">Cadps</a>    | I | 13622800  | 454 | 9  | 444 |
|    |     | <a href="#">Ca&lt;2+&gt;dependent activator protein for secretion isoform 1</a> |                          |   |           |     |    |     |
| 14 | 467 | <a href="#">large conductance calcium-activated potassium channel sub...</a>    | <a href="#">Kcnma1</a>   | I | 24322239  | 321 | 15 | 311 |
| 14 | 468 | <a href="#">Rho guanine nucleotide exchange factor (GEF) 3</a>                  | <a href="#">Arhgef3</a>  | I | 28156516  | 465 | 6  | 455 |
| 14 | 469 | <a href="#">neuregulin 3</a>                                                    | <a href="#">Nrg3</a>     | I | 39326963  | 530 | 18 | 520 |
| 14 | 470 | <a href="#">neuregulin 3</a>                                                    | <a href="#">Nrg3</a>     | I | 39561499  | 391 | 13 | 381 |
| 14 | 471 | <a href="#">SH2 domain containing 4B</a>                                        | <a href="#">Sh2d4b</a>   | I | 41695663  | 495 | 26 | 485 |
| 14 | 472 | <a href="#">WD repeat and HMG-box DNA binding protein 1</a>                     | <a href="#">Wdhd1</a>    | I | 47868949  | 506 | 21 | 496 |
| 14 | 473 | <a href="#">solute carrier family 35, member F4</a>                             | <a href="#">Slc35f4</a>  | I | 50083362  | 328 | 7  | 318 |
| 14 | 474 | <a href="#">ATPase, aminophospholipid transporter-like, class I, type...</a>    | <a href="#">Atp8a2</a>   | I | 60306699  | 380 | 14 | 370 |
| 14 | 475 | <a href="#">hypothetical protein</a>                                            |                          | I | 75372835  | 386 | 25 | 376 |
| 14 | 476 | <a href="#">dachshund 1 isoform 2</a>                                           | <a href="#">Dach1</a>    | I | 98284061  | 420 | 20 | 410 |
|    |     | <a href="#">dachshund 1 isoform 1</a>                                           |                          |   |           |     |    |     |
| 14 | 477 | <a href="#">pam, highwire, rpm 1</a>                                            | <a href="#">Mycbp2</a>   | E | 103696392 | 286 | 28 | 276 |
| 14 | 478 | <a href="#">FERMRhoGEF (Arhgef) and pleckstrin domain protein 1</a>             | <a href="#">Farp1</a>    | I | 121627221 | 462 | 6  | 452 |
| 14 | 479 | <a href="#">FERMRhoGEF (Arhgef) and pleckstrin domain protein 1</a>             | <a href="#">Farp1</a>    | I | 121627272 | 411 | 6  | 401 |
| 14 | 480 | <a href="#">FERMRhoGEF (Arhgef) and pleckstrin domain protein 1</a>             | <a href="#">Farp1</a>    | I | 121627323 | 391 | 6  | 381 |
| 14 | 481 | <a href="#">FERMRhoGEF (Arhgef) and pleckstrin domain protein 1</a>             | <a href="#">Farp1</a>    | I | 121627374 | 406 | 6  | 396 |
| 14 | 482 | <a href="#">FERMRhoGEF (Arhgef) and pleckstrin domain protein 1</a>             | <a href="#">Farp1</a>    | I | 121627425 | 355 | 6  | 345 |
| 14 | 483 | <a href="#">integrin, beta-like 1</a>                                           | <a href="#">Itgb1</a>    | I | 124344688 | 379 | 23 | 369 |
| 14 | 484 | <a href="#">fibroblast growth factor 14 isoform b</a>                           | <a href="#">Fgf14</a>    | I | 124621952 | 381 | 18 | 371 |
| 14 | 485 | <a href="#">calcium channel, voltage-dependent, alpha2/delta subunit 3</a>      | <a href="#">Cacna2d3</a> | I | 29914253  | 329 | 9  | 319 |
| 14 | 486 | <a href="#">glutamate receptor, ionotropic, delta 1</a>                         | <a href="#">Grid1</a>    | I | 35802184  | 503 | 20 | 493 |
| 14 | 487 | <a href="#">neuregulin 3</a>                                                    | <a href="#">Nrg3</a>     | I | 40146325  | 371 | 34 | 361 |
| 14 | 488 | <a href="#">neuregulin 3</a>                                                    | <a href="#">Nrg3</a>     | I | 40229621  | 302 | 18 | 292 |
| 14 | 489 | <a href="#">hypothetical protein LOC434459</a>                                  | <a href="#">Gm5622</a>   | I | 52183855  | 328 | 19 | 318 |
| 14 | 490 | <a href="#">chromodomain helicase DNA binding protein 8</a>                     | <a href="#">Chd8</a>     | I | 52822304  | 451 | 8  | 441 |
| 14 | 491 | <a href="#">exportin 4</a>                                                      | <a href="#">Xpo4</a>     | I | 58201017  | 255 | 29 | 245 |
| 14 | 492 | <a href="#">spermatogenesis associated 13 isoform 7</a>                         | <a href="#">Spata13</a>  | I | 61373417  | 479 | 27 | 469 |
| 14 | 493 | <a href="#">scavenger receptor class A, member 3</a>                            | <a href="#">Scara3</a>   | I | 66562722  | 358 | 31 | 348 |
| 14 | 494 | <a href="#">hypothetical protein LOC219170</a>                                  | <a href="#">AU021034</a> | I | 78484899  | 348 | 7  | 338 |
| 14 | 495 | <a href="#">protocadherin 17</a>                                                | <a href="#">Pcdh17</a>   | I | 84915541  | 620 | 20 | 610 |
| 14 | 496 | <a href="#">protocadherin 9</a>                                                 | <a href="#">Pcdh9</a>    | I | 93619904  | 393 | 15 | 383 |

|    |     |                                                                       |                           |   |           |     |    |     |
|----|-----|-----------------------------------------------------------------------|---------------------------|---|-----------|-----|----|-----|
| 14 | 497 | <a href="#">protocadherin 9</a>                                       | <a href="#">Pcdh9</a>     | I | 93920780  | 373 | 23 | 363 |
| 14 | 498 | <a href="#">kelch-like 1</a>                                          | <a href="#">Klhl1</a>     | I | 96773587  | 480 | 23 | 470 |
| 14 | 499 | <a href="#">RIKEN cDNA 2810028N01</a>                                 | <a href="#">JC1001874</a> | I | 99489050  | 373 | 27 | 363 |
| 14 | 500 | <a href="#">LIM domain only 7</a>                                     | <a href="#">Lmo7</a>      | I | 102143047 | 455 | 21 | 445 |
| 14 | 501 | <a href="#">LIM domain only 7</a>                                     | <a href="#">Lmo7</a>      | I | 102253504 | 425 | 23 | 415 |
| 14 | 502 | <a href="#">FERMRhoGEF (Arhgef) and pleckstrin domain protein 1</a>   | <a href="#">Farp1</a>     | I | 121591367 | 535 | 25 | 525 |
| 15 | 503 | <a href="#">complement component 9</a>                                | <a href="#">C9</a>        | I | 6409730   | 325 | 20 | 315 |
| 15 | 504 | <a href="#">WD repeat domain 70</a>                                   | <a href="#">Wdr70</a>     | I | 8017730   | 393 | 22 | 383 |
| 15 | 505 | <a href="#">prolactin receptor</a>                                    | <a href="#">Prlr</a>      | I | 10256829  | 149 | 25 | 139 |
| 15 | 506 | <a href="#">hypothetical protein</a>                                  |                           | I | 14903987  | 515 | 21 | 505 |
| 15 | 507 | <a href="#">cadherin 10</a>                                           | <a href="#">Cdh10</a>     | I | 18898160  | 536 | 27 | 526 |
| 15 | 508 | <a href="#">ank protein</a>                                           | <a href="#">Ank</a>       | I | 27514809  | 362 | 12 | 352 |
| 15 | 509 | <a href="#">hypothetical protein</a>                                  |                           | I | 28644055  | 386 | 13 | 376 |
| 15 | 510 | <a href="#">semaphorin 5A</a>                                         | <a href="#">Sema5a</a>    | I | 32402681  | 286 | 28 | 276 |
| 15 | 511 | <a href="#">semaphorin 5A</a>                                         | <a href="#">Sema5a</a>    | I | 32516497  | 618 | 15 | 608 |
| 15 | 512 | <a href="#">serine/threonine kinase 3 (Ste20, yeast homolog) STK3</a> | <a href="#">Stk3</a>      | I | 34893220  | 371 | 16 | 361 |
| 15 | 513 | <a href="#">vacuolar protein sorting 13B isoform 5</a>                | <a href="#">Vps13b</a>    | I | 35451425  | 474 | 13 | 464 |
| 15 | 514 | <a href="#">LMBR1 domain containing 2</a>                             | <a href="#">Lmbrd2</a>    | I | 9115487   | 338 | 11 | 328 |
| 15 | 515 | <a href="#">cadherin 6</a>                                            | <a href="#">Cdh6</a>      | I | 12994922  | 444 | 11 | 434 |
| 15 | 516 | <a href="#">hypothetical protein</a>                                  |                           | I | 14898926  | 529 | 25 | 519 |
| 15 | 517 | <a href="#">cadherin 12</a>                                           | <a href="#">Cdh12</a>     | I | 21506312  | 390 | 34 | 380 |
| 15 | 518 | <a href="#">plasma glutamate carboxypeptidase</a>                     | <a href="#">Pgcp</a>      | I | 33259226  | 476 | 7  | 466 |
| 15 | 519 | <a href="#">frizzled 6</a>                                            | <a href="#">Fzd6</a>      | I | 38855348  | 183 | 17 | 173 |
| 15 | 520 | <a href="#">regulating synaptic membrane exocytosis 2</a>             | <a href="#">Rims2</a>     | I | 39062207  | 422 | 25 | 412 |
| 15 | 521 | <a href="#">regulating synaptic membrane exocytosis 2</a>             | <a href="#">Rims2</a>     | I | 39235238  | 344 | 31 | 334 |
| 15 | 522 | <a href="#">regulating synaptic membrane exocytosis 2</a>             | <a href="#">Rims2</a>     | I | 39287410  | 366 | 7  | 356 |
| 15 | 523 | <a href="#">polycystic kidney and hepatic disease 1-like 1</a>        | <a href="#">Pkhd11</a>    | E | 44337141  | 400 | 21 | 390 |
| 15 | 524 | <a href="#">zinc finger transcription factor TRPS1</a>                | <a href="#">Trps1</a>     | I | 50504542  | 216 | 12 | 206 |
| 15 | 525 | <a href="#">sterile alpha motif domain containing 12</a>              | <a href="#">Samd12</a>    | I | 53719869  | 509 | 16 | 499 |
| 15 | 526 | <a href="#">collagen, type XXII, alpha 1 isoform 2</a>                | <a href="#">Col22a1</a>   | I | 71835165  | 564 | 12 | 554 |
| 15 | 527 | <a href="#">chromatin accessibility complex 1</a>                     | <a href="#">Chrac1</a>    | E | 72923913  | 536 | 31 | 526 |
| 15 | 528 | <a href="#">ataxin 10</a>                                             | <a href="#">Atxn10</a>    | I | 85230758  | 307 | 20 | 297 |
| 15 | 529 | <a href="#">periphilin 1 isoform 3</a>                                | <a href="#">Pphln1</a>    | I | 93274447  | 472 | 23 | 462 |
| 15 | 530 | <a href="#">periphilin 1 isoform 1</a>                                |                           |   |           |     |    |     |
| 15 | 530 | <a href="#">huntington yeast partner C</a>                            | <a href="#">Prpf40b</a>   | E | 99134818  | 435 | 16 | 425 |
| 15 | 531 | <a href="#">angiopoietin 1</a>                                        | <a href="#">Angpt1</a>    | I | 42367140  | 354 | 15 | 344 |
| 15 | 532 | <a href="#">polycystic kidney and hepatic disease 1-like 1</a>        | <a href="#">Pkhd11</a>    | E | 44367060  | 525 | 30 | 515 |

|    |     |                                                                                |                            |   |           |     |    |     |
|----|-----|--------------------------------------------------------------------------------|----------------------------|---|-----------|-----|----|-----|
| 15 | 533 | <a href="#">zinc finger transcription factor TRPS1</a>                         | <a href="#">Trps1</a>      | I | 50593248  | 356 | 27 | 346 |
| 15 | 534 | <a href="#">sterile alpha motif domain containing 12</a>                       | <a href="#">Samd12</a>     | I | 53417542  | 451 | 23 | 441 |
| 15 | 535 | <a href="#">non-SMC element 2 homolog (MMS21, <i>S. cerevisiae</i>)</a>        | <a href="#">Nsmce2</a>     | I | 59348227  | 409 | 10 | 399 |
| 15 | 536 | <a href="#">PHD finger protein 20-like 1</a>                                   | <a href="#">Phf20l1</a>    | I | 66418354  | 401 | 30 | 391 |
| 15 | 537 | <a href="#">kinesin family member 21A</a>                                      | <a href="#">Kif21a</a>     | E | 90772034  | 535 | 27 | 525 |
| 15 | 538 | <a href="#">hypothetical protein LOC320709</a>                                 |                            | I | 94658072  | 384 | 25 | 374 |
| 15 | 539 | <a href="#">__hypothetical protein</a>                                         |                            | I | 94952443  | 260 | 28 | 250 |
| 15 | 540 | <a href="#">insulin-like growth factor binding protein 6</a>                   | <a href="#">Igfbp6</a>     | I | 101977515 | 556 | 23 | 546 |
| 16 | 541 | <a href="#">ataxin 2 binding protein 1 isoform gamma</a>                       | <a href="#">A2bp1</a>      | I | 7078710   | 320 | 19 | 310 |
|    |     | <a href="#">__ataxin 2 binding protein 1 isoform alpha</a>                     |                            |   |           |     |    | 369 |
| 16 | 542 | <a href="#">glutamate receptor, ionotropic, NMDA2A (epsilon 1)</a>             | <a href="#">Grin2a</a>     | I | 9938844   | 379 | 13 | 393 |
| 16 | 543 | <a href="#">activating transcription factor 7 interacting protein 2 i...</a>   | <a href="#">Atf7ip2</a>    | I | 10213422  | 437 | 24 | 427 |
| 16 | 544 | <a href="#">__EF hand calcium binding domain 1</a>                             | <a href="#">Efcab1</a>     | I | 14923585  | 390 | 9  | 380 |
| 16 | 545 | <a href="#">__protein kinase, DNA activated, catalytic polypeptide</a>         | <a href="#">Prkdc</a>      | I | 15689763  | 377 | 17 | 367 |
| 16 | 546 | <a href="#">hypothetical protein LOC224008</a>                                 | <a href="#">310008H04F</a> | I | 15958050  | 324 | 20 | 314 |
| 16 | 547 | <a href="#">eukaryotic translation initiation factor 4, gamma 1 isofo...</a>   | <a href="#">Eif4g1</a>     | I | 20691747  | 343 | 18 | 333 |
|    |     | <a href="#">__eukaryotic translation initiation factor 4, gamma 1 isofo...</a> |                            |   |           |     |    | 356 |
| 16 | 548 | <a href="#">syntaxin binding protein 5-like</a>                                | <a href="#">Stxbp5l</a>    | I | 37334856  | 563 | 24 | 553 |
| 16 | 549 | <a href="#">CD200 receptor 3</a>                                               | <a href="#">Cd200</a>      | I | 44976537  | 462 | 9  | 452 |
| 16 | 550 | <a href="#">interphotoreceptor matrix proteoglycan 2</a>                       | <a href="#">Impg2</a>      | I | 56262772  | 346 | 20 | 336 |
| 16 | 551 | <a href="#">protein S (alpha)</a>                                              | <a href="#">Pros1</a>      | I | 62915111  | 232 | 25 | 222 |
| 16 | 552 | <a href="#">__similar to zinc finger protein 654</a>                           |                            | I | 64792644  | 373 | 25 | 363 |
| 16 | 553 | <a href="#">hypothetical protein LOC74478</a>                                  | <a href="#">LOC546679</a>  | I | 11643739  | 358 | 34 | 348 |
| 16 | 554 | <a href="#">kelch-like 22</a>                                                  | <a href="#">Klhl22</a>     | I | 17782326  | 516 | 28 | 506 |
| 16 | 555 | <a href="#">mitogen-activated protein kinase kinase kinase 13</a>              | <a href="#">Map3k13</a>    | I | 21913164  | 550 | 15 | 540 |
| 16 | 556 | <a href="#">LIM domain containing preferred translocation partner in ...</a>   | <a href="#">Lpp</a>        | I | 24870927  | 420 | 28 | 410 |
| 16 | 557 | <a href="#">hypothetical protein LOC239789</a>                                 | <a href="#">Gm606</a>      | I | 26977688  | 366 | 25 | 356 |
| 16 | 558 | <a href="#">protein tyrosine phosphatase-like protein PTPLB</a>                | <a href="#">Ptplb</a>      | I | 35053863  | 332 | 26 | 322 |
| 16 | 559 | <a href="#">EG433016 protein</a>                                               | <a href="#">Gm5483</a>     | I | 36187161  | 393 | 32 | 383 |
| 16 | 560 | <a href="#">__similar to stefin A2</a>                                         | <a href="#">LOC639118</a>  | I | 36309147  | 384 | 20 | 374 |
| 16 | 561 | <a href="#">syntaxin binding protein 5-like</a>                                | <a href="#">Stxbp5l</a>    | I | 37282362  | 283 | 12 | 273 |
| 16 | 562 | <a href="#">pleckstrin homology-like domain, family B, member 2</a>            | <a href="#">Phldb2</a>     | E | 45824665  | 439 | 30 | 429 |
| 16 | 563 | <a href="#">TBC1 domain family, member 23</a>                                  | <a href="#">Tbc1d23</a>    | I | 57229479  | 338 | 18 | 328 |
| 16 | 564 | <a href="#">hypothetical protein</a>                                           |                            | I | 58073593  | 451 | 14 | 441 |
| 16 | 565 | <a href="#">Eph receptor A6</a>                                                | <a href="#">Epha6</a>      | I | 60452664  | 323 | 20 | 313 |
| 16 | 566 | <a href="#">Eph receptor A3</a>                                                | <a href="#">Epha3</a>      | I | 63563576  | 388 | 6  | 378 |
| 16 | 567 | <a href="#">glucan (1,4-alpha-), branching enzyme 1</a>                        | <a href="#">Gbe1</a>       | I | 70390635  | 358 | 25 | 348 |

|    |     |                                                                               |                            |   |          |     |    |     |
|----|-----|-------------------------------------------------------------------------------|----------------------------|---|----------|-----|----|-----|
| 16 | 568 | <a href="#">glucan (1,4-alpha-), branching enzyme 1</a>                       | <a href="#">Gbe1</a>       | I | 70565132 | 307 | 19 | 297 |
| 16 | 569 | <a href="#">roundabout homolog 2</a>                                          | <a href="#">Robo2</a>      | I | 74289987 | 394 | 8  | 384 |
| 16 | 570 | <a href="#">dual-specificity tyrosine-(Y)-phosphorylation regulated k...</a>  | <a href="#">Mapk1</a>      | I | 94902969 | 398 | 31 | 388 |
| 16 | 571 | <a href="#">_mitochondrial ribosomal protein L39</a>                          | <a href="#">Mrpl39</a>     | I | 84728583 | 391 | 33 | 381 |
| 16 | 572 | <a href="#">tetratricopeptide repeat domain 3</a>                             | <a href="#">Ttc3</a>       | I | 94619269 | 426 | 23 | 416 |
| 16 | 573 | <a href="#">_cell adhesion molecule JCAM</a>                                  | <a href="#">Igsf5</a>      | I | 96605291 | 502 | 25 | 492 |
| 17 | 574 | <a href="#">hypothetical protein</a>                                          |                            | I | 6672015  | 384 | 9  | 374 |
| 17 | 575 | <a href="#">hypothetical protein</a>                                          |                            | I | 6877217  | 384 | 9  | 374 |
| 17 | 576 | <a href="#">AT rich interactive domain 1B (Swi1 like) isoform 1</a>           | <a href="#">LOC634040</a>  | I | 5258829  | 424 | 17 | 414 |
|    |     | <a href="#">_AT rich interactive domain 1B (Swi1 like)</a>                    |                            |   |          |     |    | 445 |
| 17 | 577 | <a href="#">_synaptojanin 2</a>                                               | <a href="#">Synj2</a>      | E | 6040365  | 455 | 28 |     |
| 17 | 578 | <a href="#">similar to UNC-93A protein</a>                                    | <a href="#">LOC545233</a>  | I | 7571465  | 233 | 12 | 223 |
| 17 | 579 | <a href="#">solute carrier family 22 member 1</a>                             | <a href="#">Slc22a1</a>    | I | 12842534 | 391 | 21 |     |
| 17 | 580 | <a href="#">parkin</a>                                                        | <a href="#">Park2</a>      | I | 11357706 | 536 | 16 |     |
| 17 | 581 | <a href="#">unc-93 homolog A</a>                                              | <a href="#">Unc93a</a>     | I | 13305803 | 222 | 12 | 381 |
| 17 | 582 | <a href="#">similar to putative pheromone receptor</a>                        | <a href="#">LOC636884</a>  | I | 19796707 | 367 | 23 | 357 |
| 17 | 583 | <a href="#">BTB (POZ) domain containing 9</a>                                 | <a href="#">Btbd9</a>      | I | 30559824 | 504 | 26 | 350 |
| 17 | 584 | <a href="#">TBC1 domain family, member 5</a>                                  | <a href="#">Tbc1d5</a>     | I | 50909323 | 534 | 31 | 524 |
| 17 | 585 | <a href="#">TBC1 domain family, member 5</a>                                  | <a href="#">Tbc1d5</a>     | I | 50920992 | 384 | 14 | 374 |
| 17 | 586 | <a href="#">EGF-like module containing, mucin-like, hormone receptor-...</a>  | <a href="#">Emr4</a>       | I | 57602531 | 405 | 11 | 395 |
| 17 | 587 | <a href="#">contactin associated protein-like 5C</a>                          | <a href="#">Cntnap5c</a>   | I | 58275671 | 319 | 26 | 309 |
| 17 | 588 | <a href="#">latent transforming growth factor beta binding protein 1 ...</a>  | <a href="#">Ltbp1</a>      | I | 75627238 | 416 | 7  | 406 |
|    |     | <a href="#">_latent transforming growth factor beta binding protein 1 ...</a> |                            |   |          |     |    | 142 |
| 17 | 589 | <a href="#">_CCAAT/enhancer binding protein zeta</a>                          | <a href="#">Cebpz</a>      | I | 79323093 | 152 | 22 |     |
| 17 | 590 | <a href="#">solute carrier family 8 (sodium/calcium exchanger), member 1</a>  | <a href="#">Slc8a1</a>     | I | 81942896 | 364 | 16 | 354 |
| 17 | 591 | <a href="#">thyroid adenoma associated</a>                                    | <a href="#">Thada</a>      | I | 84681549 | 262 | 16 | 252 |
| 17 | 592 | <a href="#">leucine-rich PPR motif-containing protein</a>                     | <a href="#">Lrpprc</a>     | I | 85128981 | 390 | 30 | 380 |
| 17 | 593 | <a href="#">hypothetical protein LOC73582</a>                                 | <a href="#">700106N22F</a> | I | 85808749 | 315 | 15 | 305 |
| 17 | 594 | <a href="#">_potassium channel, subfamily K, member 12</a>                    | <a href="#">Kcnk12</a>     | I | 88195029 | 538 | 7  | 528 |
| 17 | 595 | <a href="#">secreted modular calcium-binding protein 2</a>                    | <a href="#">Smoc2</a>      | I | 14450548 | 367 | 33 | 357 |
| 17 | 596 | <a href="#">_similar to putative pheromone receptor</a>                       | <a href="#">LOC636884</a>  | I | 19196229 | 409 | 26 | 399 |
| 17 | 597 | <a href="#">_similar to putative pheromone receptor</a>                       | <a href="#">LOC636884</a>  | I | 19812769 | 361 | 28 | 351 |
| 17 | 598 | <a href="#">serine/threonine kinase 38</a>                                    | <a href="#">Stk38</a>      | I | 29129187 | 379 | 31 | 369 |
| 17 | 599 | <a href="#">runt related transcription factor 2</a>                           | <a href="#">Runx2</a>      | I | 44809710 | 272 | 12 | 262 |
| 17 | 600 | <a href="#">hypothetical protein</a>                                          |                            | I | 51422743 | 304 | 13 | 294 |
| 17 | 601 | <a href="#">discs large homolog-associated protein 1 isoform 1</a>            | <a href="#">Dlgap1</a>     | I | 71093228 | 355 | 19 | 345 |
|    |     | <a href="#">_discs large homolog-associated protein 1 isoform 2</a>           |                            |   |          |     |    |     |



|    |     |                                                                                                                                                               |                            |   |          |     |    |     |
|----|-----|---------------------------------------------------------------------------------------------------------------------------------------------------------------|----------------------------|---|----------|-----|----|-----|
| 17 | 602 | <a href="#">hypothetical protein LOC73582</a>                                                                                                                 | <a href="#">700106N22F</a> |   | 85541278 | 189 | 15 | 179 |
| 17 | 603 | <a href="#">neurexin I</a>                                                                                                                                    | <a href="#">Nrxn1</a>      |   | 91189233 | 402 | 12 | 392 |
| 18 | 604 | <a href="#">expressed sequence AW060714</a>                                                                                                                   | <a href="#">AW060714</a>   |   | 34636297 | 256 | 20 | 246 |
| 18 | 605 | <a href="#">heat shock protein 9A</a>                                                                                                                         | <a href="#">Hspa9</a>      |   | 35108239 | 401 | 26 | 391 |
| 18 | 606 | <a href="#">matrin 3</a>                                                                                                                                      | <a href="#">Matr3</a>      |   | 35735465 | 365 | 30 | 355 |
| 18 | 607 | <a href="#">IK cytokine</a>                                                                                                                                   | <a href="#">Ik</a>         |   | 36905526 | 421 | 13 | 411 |
| 18 | 608 | <a href="#">Yip1 domain family, member 5</a>                                                                                                                  | <a href="#">Yipf5</a>      |   | 40373433 | 476 | 21 | 466 |
| 18 | 609 | <a href="#">protein phosphatase 2 (formerly 2A), regulatory subunit B...</a><br><a href="#">_protein phosphatase 2 (formerly 2A), regulatory subunit B...</a> | <a href="#">Ppp2r2b</a>    |   | 42923282 | 315 | 14 | 305 |
| 18 | 610 | <a href="#">hypothetical protein LOC74574</a>                                                                                                                 |                            |   | 47039351 | 309 | 18 | 299 |
| 18 | 611 | <a href="#">GRAM domain containing 3</a>                                                                                                                      | <a href="#">Gramd3</a>     |   | 56643931 | 283 | 28 | 273 |
| 18 | 612 | <a href="#">deleted in colorectal carcinoma</a>                                                                                                               | <a href="#">Dcc</a>        |   | 71861094 | 391 | 14 | 381 |
| 18 | 613 | <a href="#">deleted in colorectal carcinoma</a>                                                                                                               | <a href="#">Dcc</a>        |   | 72442999 | 474 | 14 | 464 |
| 18 | 614 | <a href="#">_hypothetical protein LOC71531</a>                                                                                                                | <a href="#">333408B17F</a> |   | 62891808 | 267 | 34 | 257 |
| 18 | 615 | <a href="#">hypothetical protein LOC52662</a>                                                                                                                 | <a href="#">D18Ert653e</a> |   | 63731041 | 475 | 24 | 465 |
| 18 | 616 | <a href="#">Msx-interacting-zinc finger</a>                                                                                                                   | <a href="#">Pias2</a>      |   | 76043090 | 417 | 23 | 407 |
| 18 | 617 | <a href="#">_ring finger protein 165</a>                                                                                                                      | <a href="#">Rnf165</a>     |   | 77305377 | 406 | 20 | 396 |
| 18 | 618 | <a href="#">_zinc finger protein 407</a>                                                                                                                      | <a href="#">Rnf165</a>     |   | 81959529 | 580 | 7  | 570 |
| 18 | 619 | <a href="#">platelet and T cell activation antigen 1 isoform b</a><br><a href="#">_platelet and T cell activation antigen 1 isoform a</a>                     | <a href="#">Cd226</a>      |   | 82590332 | 291 | 27 | 281 |
| 18 | 620 | <a href="#">F-box protein 15</a>                                                                                                                              | <a href="#">Fbxo15</a>     |   | 82759001 | 601 | 29 | 591 |
| 19 | 621 | <a href="#">_suppressor of variegation 4-20 homolog 1</a>                                                                                                     | <a href="#">Suv420h1</a>   |   | 3805940  | 605 | 21 | 595 |
| 19 | 622 | <a href="#">spectrin beta 3</a>                                                                                                                               | <a href="#">Spnb3</a>      |   | 4728528  | 462 | 11 | 452 |
| 19 | 623 | <a href="#">_hypothetical protein LOC434674</a>                                                                                                               | <a href="#">Gm5631</a>     |   | 8204852  | 402 | 14 |     |
| 19 | 624 | <a href="#">_integral membrane transport protein UST1R</a>                                                                                                    | <a href="#">730048C13F</a> |   | 8475461  | 327 | 14 |     |
| 19 | 625 | <a href="#">transient receptor potential cation channel, subfamily M,...</a>                                                                                  | <a href="#">Trpm3</a>      |   | 18931629 | 381 | 21 | 371 |
| 19 | 626 | <a href="#">RAR-related orphan receptor beta isoform 1</a><br><a href="#">_RAR-related orphan receptor beta isoform 2</a>                                     | <a href="#">Rorb</a>       |   | 19071353 | 460 | 11 | 450 |
| 19 | 627 | <a href="#">_very low density lipoprotein receptor</a>                                                                                                        | <a href="#">Vldlr</a>      |   | 27319539 | 455 | 8  | 445 |
| 19 | 628 | <a href="#">_hypothetical protein LOC381218</a>                                                                                                               | <a href="#">430402118R</a> |   | 29027075 | 364 | 25 | 354 |
| 19 | 629 | <a href="#">adenylate kinase 3</a>                                                                                                                            | <a href="#">AK3</a>        |   | 29114367 | 393 | 13 | 383 |
| 19 | 630 | <a href="#">membrane-spanning 4-domains, subfamily A, member 4D</a>                                                                                           | <a href="#">Ms4a4d</a>     | E | 11632295 | 455 | 10 | 445 |
| 19 | 631 | <a href="#">cell division cycle 37 homolog (S. cerevisiae)-like 1</a>                                                                                         | <a href="#">Cdc3711</a>    |   | 29072869 | 397 | 30 | 387 |
| 19 | 632 | <a href="#">protein kinase, cGMP-dependent, type I beta isoform</a><br><a href="#">_protein kinase, cGMP-dependent, type I alpha isoform</a>                  | <a href="#">Prkg1</a>      |   | 31557872 | 379 | 30 | 369 |
| 19 | 633 | <a href="#">cytoplasmic polyadenylation element binding protein 3</a>                                                                                         | <a href="#">Cpeb3</a>      |   | 37153964 | 383 | 21 | 373 |

|    |     |                                                                                |                            |   |          |     |    |     |
|----|-----|--------------------------------------------------------------------------------|----------------------------|---|----------|-----|----|-----|
| 19 | 634 | <a href="#">leucine-rich repeat LGI family, member 1</a>                       | <a href="#">Lgi1</a>       | E | 38339340 | 343 | 24 | 333 |
| 19 | 635 | <a href="#">cyclin M2</a>                                                      | <a href="#">Cnnm2</a>      | I | 46896833 | 391 | 26 | 381 |
| 19 | 636 | <a href="#">SORCS receptor 1</a>                                               | <a href="#">Sorcs1</a>     | I | 50380435 | 413 | 31 | 403 |
| 19 | 637 | <a href="#">Max interactor 1 isoform b</a>                                     | <a href="#">Mxi1</a>       | I | 53430348 | 513 | 34 | 503 |
|    |     | <a href="#">__Max interactor 1 isoform a</a>                                   |                            |   |          |     |    | 353 |
| 19 | 638 | <a href="#">chondroitin sulfate proteoglycan 6</a>                             | <a href="#">Smc3</a>       | I | 53693119 | 363 | 23 |     |
| 19 | 639 | <a href="#">NHL repeat containing 2</a>                                        | <a href="#">Nhlrc2</a>     | I | 56653429 | 244 | 26 | 234 |
| 19 | 640 | <a href="#">similar to Sm protein G</a>                                        | <a href="#">JC10004496</a> | I | 57660698 | 585 | 12 | 575 |
| 19 | 641 | <a href="#">__attractin-like 1</a>                                             | <a href="#">Atrnl1</a>     | I | 58055673 | 432 | 13 | 422 |
| X  | 642 | <a href="#">shroom family member 4</a>                                         | <a href="#">Shroom4</a>    | I | 6016343  | 265 | 19 | 255 |
| X  | 643 | <a href="#">shroom family member 4</a>                                         | <a href="#">Shroom4</a>    | I | 6042014  | 367 | 15 | 357 |
| X  | 644 | <a href="#">ubiquitously transcribed tetratricopeptide repeat gene, X...</a>   | <a href="#">Kdm6a</a>      | I | 17852438 | 359 | 9  | 349 |
| X  | 645 | <a href="#">cytochrome b-245, beta polypeptide</a>                             | <a href="#">Cybb</a>       | E | 9026407  | 365 | 26 | 355 |
| X  | 646 | <a href="#">ubiquitin specific protease 9, X chromosome</a>                    | <a href="#">Usp9x</a>      | I | 12728403 | 398 | 19 | 388 |
| X  | 647 | <a href="#">ubiquitously transcribed tetratricopeptide repeat gene, X...</a>   | <a href="#">Kdm6a</a>      | I | 17800937 | 374 | 29 | 364 |
| X  | 648 | <a href="#">glypican 3</a>                                                     | <a href="#">Gpc3</a>       | I | 49683579 | 434 | 29 | 424 |
| X  | 649 | <a href="#">glutamate receptor, ionotropic, AMPA3 (alpha 3)</a>                | <a href="#">Gria3</a>      | I | 38910147 | 432 | 28 | 422 |
| X  | 650 | <a href="#">odd Oz/ten-m homolog 1</a>                                         | <a href="#">Odz1</a>       | I | 40282787 | 298 | 19 | 288 |
| X  | 651 | <a href="#">odd Oz/ten-m homolog 1</a>                                         | <a href="#">Odz1</a>       | I | 40382240 | 312 | 21 | 302 |
| X  | 652 | <a href="#">serine/threonine protein kinase MST4</a>                           | <a href="#">MST4</a>       | I | 48218018 | 364 | 9  | 354 |
| X  | 653 | <a href="#">glypican 3</a>                                                     | <a href="#">Gpc3</a>       | I | 49817936 | 345 | 23 | 335 |
| X  | 654 | <a href="#">__solute carrier family 9 (sodium/hydrogen exchanger), isof...</a> | <a href="#">Slc9a6</a>     | I | 53869691 | 390 | 27 | 380 |
| X  | 655 | <a href="#">gamma-aminobutyric acid (GABA-A) receptor, subunit alpha 3</a>     | <a href="#">Gabra3</a>     | I | 69682927 | 364 | 30 | 354 |
| X  | 656 | <a href="#">c6.1a protein</a>                                                  | <a href="#">Brcc3</a>      | I | 72664755 | 374 | 12 | 364 |
| X  | 657 | <a href="#">von Hippel-Lindau binding protein 1</a>                            | <a href="#">Vbp1</a>       | E | 72776372 | 408 | 8  | 398 |
| X  | 658 | <a href="#">__hypothetical protein</a>                                         |                            | I | 76666292 | 324 | 22 | 314 |
| X  | 659 | <a href="#">polymerase (DNA directed), alpha 1</a>                             | <a href="#">Pola1</a>      | I | 90650142 | 364 | 25 | 354 |
| X  | 660 | <a href="#">eukaryotic translation initiation factor 2, subunit 3, st...</a>   | <a href="#">Eif2s3x</a>    | E | 91441513 | 470 | 31 | 460 |
| X  | 661 | <a href="#">__G protein-coupled receptor 112</a>                               | <a href="#">Gpr112</a>     | I | 54193993 | 358 | 9  | 348 |
| X  | 662 | <a href="#">Atpase, class VI, type 11C isoform b</a>                           | <a href="#">Atp11c</a>     | I | 57493333 | 355 | 29 | 345 |
|    |     | <a href="#">__Atpase, class VI, type 11C isoform a</a>                         |                            |   |          |     |    |     |
| X  | 663 | <a href="#">growth factor receptor bound protein 2-associated protein 3</a>    | <a href="#">Gab3</a>       | I | 72301545 | 407 | 24 | 397 |
|    |     | <a href="#">__growth factor receptor bound protein 2-associated protein 3</a>  |                            |   |          |     |    |     |
| X  | 664 | <a href="#">c6.1a protein</a>                                                  | <a href="#">Brcc3</a>      | I | 72690339 | 570 | 22 | 560 |
| X  | 665 | <a href="#">dystrophin, muscular dystrophy</a>                                 | <a href="#">Dmd</a>        | I | 80479163 | 207 | 17 | 197 |
| X  | 666 | <a href="#">__dystrophin, muscular dystrophy</a>                               | <a href="#">Dmd</a>        | I | 81283341 | 360 | 15 | 350 |
| X  | 667 | <a href="#">__dystrophin, muscular dystrophy</a>                               | <a href="#">Dmd</a>        | E | 81719295 | 462 | 15 | 452 |



|   |     |                                                                              |                            |   |           |     |    |     |
|---|-----|------------------------------------------------------------------------------|----------------------------|---|-----------|-----|----|-----|
| X | 668 | <a href="#">glycerol kinase isoform 1</a>                                    | <a href="#">Gyk</a>        | I | 82949975  | 370 | 7  | 360 |
|   |     | <a href="#">glycerol kinase isoform 2</a>                                    |                            | I |           |     |    |     |
| X | 669 | <a href="#">similar to interleukin 1 receptor accessory protein-like ...</a> | <a href="#">LOC279557</a>  | I | 84340169  | 384 | 12 | 374 |
| X | 670 | <a href="#">similar to interleukin 1 receptor accessory protein-like ...</a> | <a href="#">LOC279557</a>  | I | 84460975  | 369 | 24 | 359 |
| X | 671 | <a href="#">polymerase (DNA directed), alpha 1</a>                           | <a href="#">Pola1</a>      | I | 90628589  | 376 | 25 | 366 |
| X | 672 | <a href="#">pyruvate dehydrogenase kinase, isoenzyme 3</a>                   | <a href="#">Pdk3</a>       | I | 91070509  | 411 | 24 | 401 |
| X | 673 | <a href="#">dachshund 2</a>                                                  | <a href="#">Dach2</a>      | I | 110805240 | 463 | 21 | 453 |
| X | 674 | <a href="#">similar to testis expressed gene 16</a>                          | <a href="#">CC1000461</a>  | I | 109131759 | 254 | 18 | 244 |
| X | 675 | <a href="#">hypothetical protein LOC67715</a>                                | <a href="#">J10106E10F</a> | I | 109664817 | 287 | 18 | 277 |
| X | 676 | <a href="#">choroideremia</a>                                                | <a href="#">Chm</a>        | I | 110187239 | 365 | 23 | 355 |
| X | 677 | <a href="#">diaphanous homolog 2</a>                                         | <a href="#">Diap2</a>      | I | 126753608 | 362 | 9  | 352 |
| X | 678 | <a href="#">zinc finger, matrin type 1</a>                                   | <a href="#">Zmat1</a>      | I | 131529228 | 304 | 31 | 294 |
| X | 679 | <a href="#">interleukin 1 receptor accessory protein-like 2</a>              | <a href="#">Il1rapl2</a>   | I | 134555317 | 511 | 8  | 501 |
| X | 680 | <a href="#">hypothetical protein LOC331537</a>                               | <a href="#">J30019M04F</a> | I | 136614510 | 188 | 13 | 178 |
| X | 681 | <a href="#">cleavage stimulation factor, 3' pre-RNA subunit 2</a>            | <a href="#">Cstf2</a>      | E | 130607365 | 588 | 17 | 578 |
| X | 682 | <a href="#">interleukin 1 receptor accessory protein-like 2</a>              | <a href="#">Il1rapl2</a>   | I | 134885608 | 373 | 9  | 363 |
| X | 683 | <a href="#">ring finger protein 128</a>                                      | <a href="#">Rnf128</a>     | I | 136152453 | 344 | 33 | 334 |
| X | 684 | <a href="#">RNA binding motif protein 41</a>                                 | <a href="#">Rbm41</a>      | I | 136513200 | 412 | 13 | 402 |
| X | 685 | <a href="#">glucocorticoid-induced leucine zipper isoform 1</a>              | <a href="#">Tsc22d3</a>    | I | 137078896 | 384 | 16 | 374 |
| X | 686 | <a href="#">acyl-CoA synthetase long-chain family member 4 isoform 1</a>     | <a href="#">Acsl4</a>      | E | 138773955 | 277 | 30 |     |
|   |     | <a href="#">acyl-CoA synthetase long-chain family member 4 isoform 2</a>     |                            | I |           |     |    | 436 |
| X | 687 | <a href="#">p21 (CDKN1A)-activated kinase 3</a>                              |                            | I | 140151397 | 446 | 27 | 354 |
| X | 688 | <a href="#">doublecortin</a>                                                 | <a href="#">Dcx</a>        | I | 140343625 | 364 | 30 | 170 |
| X | 689 | <a href="#">transient receptor potential cation channel, subfamily C,...</a> | <a href="#">Trpc5</a>      | I | 140836850 | 180 | 25 |     |
| X | 690 | <a href="#">5-hydroxytryptamine (serotonin) receptor 2C</a>                  | <a href="#">Htr2c</a>      | I | 143542689 | 347 | 22 | 337 |
| X | 691 | <a href="#">connector enhancer of kinase suppressor of Ras 2</a>             | <a href="#">Cnksr2</a>     | I | 154283275 | 424 | 31 | 414 |
| X | 692 | <a href="#">protein phosphatase with EF hand calcium-binding domain 1</a>    | <a href="#">Ppef1</a>      | I | 157087588 | 168 | 15 | 158 |
| X | 693 | <a href="#">PDZ domain containing 10</a>                                     | <a href="#">Frmpd4</a>     | I | 164231663 | 483 | 31 | 473 |
| X | 694 | <a href="#">PDZ domain containing 10</a>                                     | <a href="#">Frmpd4</a>     | I | 164330477 | 390 | 17 | 380 |
| X | 695 | <a href="#">Rho GTPase activating protein 6 isoform a</a>                    | <a href="#">Arhgap6</a>    | I | 165322945 | 420 | 27 | 410 |
| X | 696 | <a href="#">Rho GTPase activating protein 6 isoform a</a>                    | <a href="#">Arhgap6</a>    | I | 165524835 | 423 | 14 | 413 |
|   |     | <a href="#">Rho GTPase activating protein 6 isoform b</a>                    |                            |   |           |     |    |     |
| X | 697 | <a href="#">procollagen, type IV, alpha 5</a>                                | <a href="#">Col4a5</a>     | I | 137935411 | 549 | 9  | 539 |
| X | 698 | <a href="#">Nance-Horan syndrome</a>                                         | <a href="#">Nhs</a>        | I | 158438559 | 474 | 18 | 464 |
| X | 699 | <a href="#">gamma-taxilin</a>                                                | <a href="#">J32441K18F</a> | I | 159262560 | 362 | 11 | 352 |
| X | 700 | <a href="#">cytidine triphosphate synthase II</a>                            | <a href="#">Ctps2</a>      | I | 159454313 | 448 | 26 | 438 |
| X | 701 | <a href="#">BMX non-receptor tyrosine kinase</a>                             | <a href="#">Bmx</a>        | E | 160685537 | 186 | 12 | 176 |

|   |     |                                                           |                         |   |           |     |    |     |
|---|-----|-----------------------------------------------------------|-------------------------|---|-----------|-----|----|-----|
| X | 702 | <a href="#">Rho GTPase activating protein 6 isoform a</a> | <a href="#">Arhgap6</a> | I | 165448644 | 427 | 22 | 417 |
|---|-----|-----------------------------------------------------------|-------------------------|---|-----------|-----|----|-----|

**Supplemental Table S 9:** analysis of the number of cogenes mapping within genes.

| Numbers of genes with X cogenes | X cogenes | rate   |
|---------------------------------|-----------|--------|
| 449                             | 1         | 84,56% |
| 66                              | 2         | 12,43% |
| 10                              | 3         | 1,88%  |
| 3                               | 4         | 0,56%  |
| 0                               | 5         | 0,00%  |
| 2                               | 6         | 0,38%  |
| 1                               | 12        | 0,19%  |

Tabella 1

| Category        | Term                                          | Count | %                  | PValue                 | fold Enrichment | Bonferroni             | Benjamini             |
|-----------------|-----------------------------------------------|-------|--------------------|------------------------|-----------------|------------------------|-----------------------|
| SP_PIR_KEYWORDS | alternative splicing                          | 227   | 44.773175542406314 | 4.6427441348876877E-29 | 512:46:00       | 1.4763926348942845E-26 | 4.763926348942845E-26 |
| UP_SEQ_FEATURE  | splice variant                                | 223   | 43.98422090729783  | 1.4635869966318711E-24 | 856:13:00       | 2.3666201735537354E-21 | 3.666201735537354E-21 |
| UP_TISSUE       | Brain                                         | 273   | 53.84615384615385  | 1.4416143634642768E-17 | 125:06:00       | 2.277750694273557E-15  | 2.277750694273557E-15 |
| UP_SEQ_FEATURE  | domain:EGF-like 1                             | 21    | 4.142011834319527  | 8.940513850675767E-12  | 1041:44:00      | 1.4456812635899041E-8  | 7.228406317949521E-9  |
| SP_PIR_KEYWORDS | phosphoprotein                                | 229   | 45.16765285996055  | 3.6311340539997333E-10 | 969:06:00       | 1.1547006351086964E-7  | 5.7735033420769355E-8 |
| UP_SEQ_FEATURE  | domain:EGF-like 2                             | 17    | 3.353057199211045  | 3.6451379159606417E-10 | 602:49:00       | 5.894185641786009E-7   | 1.964728932879467E-7  |
| GOTERM_BP_FAT   | GO:0007155~cell adhesion                      | 43    | 8.481262327416173  | 4.995287935423373E-10  | 465:18:00       | 8.317150259617989E-7   | 8.317150259617989E-7  |
| GOTERM_BP_FAT   | GO:0022610~biological adhesion                | 43    | 8.481262327416173  | 5.302398271387377E-10  | 99:54:00        | 8.828489641565795E-7   | 4.4142457955587133E-7 |
| SP_PIR_KEYWORDS | egf-like domain                               | 26    | 5.128205128205128  | 7.541869857922776E-10  | 382:45:00       | 2.3983141672623276E-7  | 7.994381190368216E-8  |
| UP_TISSUE       | Cerebellum                                    | 80    | 15.779092702169626 | 1.3296832736434266E-9  | 376:02:00       | 2.1008993189575165E-7  | 1.0504497149899095E-7 |
| UP_SEQ_FEATURE  | compositionally biased region:Ser-rich        | 34    | 6.70611439842209   | 5.780202058866013E-9   | 742:44:00       | 9.346543135002605E-6   | 2.3366439736438593E-6 |
| INTERPRO        | IPR013032:EGF-like region, conserved site     | 29    | 5.719921104536489  | 9.538820383381808E-9   | 481:53:00       | 8.251045645502053E-6   | 8.251045645502053E-6  |
| INTERPRO        | IPR006210:EGF-like                            | 23    | 4.536489151873767  | 1.4587534912419551E-8  | 407:47:00       | 1.26181382210655E-5    | 6.30908901289029E-6   |
| INTERPRO        | IPR000742:EGF-like, type 3                    | 22    | 4.339250493096647  | 4.9566806372432665E-8  | 901:27:00       | 4.287436940264566E-5   | 1.429166071809096E-5  |
| INTERPRO        | IPR006209:EGF                                 | 17    | 3.353057199211045  | 1.9421569535272787E-7  | 242:24:00       | 1.6798248211424838E-4  | 1.998266236076276E-5  |
| SP_PIR_KEYWORDS | cell adhesion                                 | 30    | 5.9171597633136095 | 2.33172871925803E-7    | 642:15:00       | 7.414623294099698E-5   | 1.8537073663504877E-5 |
| SP_PIR_KEYWORDS | glycoprotein                                  | 139   | 27.416173570019726 | 3.7326789558502797E-7  | 140:05:00       | 1.1869216847892883E-4  | 2.373956080248263E-5  |
| UP_TISSUE       | Brain cortex                                  | 38    | 7.495069033530571  | 5.624766443818292E-7   | 744:15:00       | 8.886738586477705E-5   | 2.9623339488527023E-5 |
| GOTERM_MF_FAT   | GO:0005509~calcium ion binding                | 47    | 9.270216962524655  | 8.340762642158162E-7   | 656:20:00       | 4.1194897204444025E-4  | 4.1194897204444025E-4 |
| GOTERM_CC_FAT   | GO:0005886~plasma membrane                    | 118   | 23.274161735700197 | 1.0328083970172322E-6  | 950:39:00       | 3.2218447370879755E-4  | 3.2218447370879755E-4 |
| UP_SEQ_FEATURE  | topological domain:Extracellular              | 97    | 19.13214990138067  | 1.2026590691168901E-6  | 681:36:00       | 1033:14:00             | 3.888645494062315E-4  |
| SP_PIR_KEYWORDS | membrane                                      | 191   | 37.67258382642998  | 1.651741766592107E-6   | 956:01:00       | 5.251163936671466E-4   | 8.75385542048468E-5   |
| UP_SEQ_FEATURE  | domain:EGF-like 3                             | 12    | 2.366863905325444  | 1.6667009441297183E-6  | 161:08:00       | 868:30:00              | 4.49075414206912E-4   |
| GOTERM_CC_FAT   | GO:0045202~synapse                            | 26    | 5.128205128205128  | 1.8402322553838105E-6  | 1061:35:00      | 5.739881976704053E-4   | 2.870352934650766E-4  |
| SMART           | SM00181:EGF                                   | 23    | 4.536489151873767  | 2.212354153557736E-6   | 732:59:00       | 4.5121891667498915E-4  | 4.5121891667498915E-4 |
| UP_SEQ_FEATURE  | domain:EGF-like 8                             | 8     | 1.5779092702169626 | 4.772036284928634E-6   | 805:11:00       | 1073:20:00             | 165:59:00             |
| INTERPRO        | IPR012680:Laminin G, subdomain 2              | 9     | 1.7751479289940828 | 5.600206201827588E-6   | 128:01:00       | 847:27:00              | 9.683692133772848E-4  |
| SP_PIR_KEYWORDS | ion transport                                 | 34    | 6.70611439842209   | 5.63007018134218E-6    | 995:36:00       | 433:42:00              | 2.557340598456914E-4  |
| UP_SEQ_FEATURE  | domain:Fibronectin type-III 1                 | 15    | 2.9585798816568047 | 6.028776287425965E-6   | 436:22:00       | 931:13:00              | 632:53:00             |
| GOTERM_MF_FAT   | GO:0022838~substrate specific channel activit | 26    | 5.128205128205128  | 6.552413642849687E-6   | 253:02:00       | 149:26:00              | 694:45:00             |
| GOTERM_CC_FAT   | GO:0005887~integral to plasma membrane        | 34    | 6.70611439842209   | 7.171833632829141E-6   | 925:15:00       | 568:11:00              | 7.455952780617281E-4  |
| GOTERM_MF_FAT   | GO:0015267~channel activity                   | 26    | 5.128205128205128  | 8.151154291355393E-6   | 749:40:00       | 963:43:00              | 52:58:00              |
| GOTERM_MF_FAT   | GO:0022803~passive transmembrane transpor     | 26    | 5.128205128205128  | 8.151154291355393E-6   | 749:40:00       | 963:43:00              | 52:58:00              |
| INTERPRO        | IPR003961:Fibronectin, type III               | 18    | 3.5502958579881656 | 9.641843928693978E-6   | 367:55:00       | 291:05:00              | 633:43:00             |
| UP_TISSUE       | Diencephalon                                  | 25    | 4.930966469428008  | 1.0502925253888818E-5  | 993:12:00       | 565:44:00              | 4.1478168047737185E-4 |
| GOTERM_MF_FAT   | GO:0005216~ion channel activity               | 25    | 4.930966469428008  | 1.1549613368148355E-5  | 49:23:00        | 193:29:00              | 436:59:00             |
| SP_PIR_KEYWORDS | synapse                                       | 19    | 3.7475345167652856 | 1.177224153908045E-5   | 150:34:00       | 648:16:00              | 4.6783988436494006E-4 |
| SP_PIR_KEYWORDS | ionic channel                                 | 23    | 4.536489151873767  | 1.3389440257936286E-5  | 571:59:00       | 199:34:00              | 4.729848304302342E-4  |
| GOTERM_CC_FAT   | GO:0044459~plasma membrane part               | 73    | 14.398422090729785 | 1.3878362627431631E-5  | 1030:59:00      | 974:39:00              | 04:19:00              |
| GOTERM_CC_FAT   | GO:0031226~intrinsic to plasma membrane       | 34    | 6.70611439842209   | 1.6000458068029487E-5  | 937:20:00       | 528:54:00              | 9.979382992398866E-4  |
| INTERPRO        | IPR001791:Laminin G                           | 9     | 1.7751479289940828 | 1.7133889116869464E-5  | 563:17:00       | 217:02:00              | 994:11:00             |

## Tabella 1

|                 |                                                |     |                    |                       |            |            |                      |
|-----------------|------------------------------------------------|-----|--------------------|-----------------------|------------|------------|----------------------|
| SP_PIR_KEYWORDS | calcium                                        | 40  | 7.889546351084813  | 1.756364853964047E-5  | 723:58:00  | 785:27:00  | 5.583729802318693E-4 |
| GOTERM_CC_FAT   | GO:0044456~synapse part                        | 19  | 3.7475345167652856 | 1.7975228091412067E-5 | 31:46:00   | 729:01:00  | 9.3428354678049E-4   |
| INTERPRO        | IPR000421:Coagulation factor 5/8 type, C-term  | 7   | 1.3806706114398422 | 1.976819221266106E-5  | 320:17:00  | 204:34:00  | 188:15:00            |
| GOTERM_BP_FAT   | GO:0007267~cell-cell signaling                 | 22  | 4.339250493096647  | 2.1376134765353594E-5 | 1090:19:00 | 375:41:00  | 966:44:00            |
| UP_SEQ_FEATURE  | domain:Fibronectin type-III 2                  | 14  | 2.7613412228796843 | 2.6366159420154017E-5 | 838:59:00  | 873:24:00  | 297:51:00            |
| GOTERM_BP_FAT   | GO:0006796~phosphate metabolic process         | 44  | 8.678500986193294  | 2.728550049705614E-5  | 573:29:00  | 116:02:00  | 542:12:00            |
| GOTERM_BP_FAT   | GO:0006793~phosphorus metabolic process        | 44  | 8.678500986193294  | 2.728550049705614E-5  | 573:29:00  | 116:02:00  | 542:12:00            |
| INTERPRO        | IPR013320:Concanavalin A-like lectin/glucanase | 11  | 2.1696252465483234 | 2.7550269136734724E-5 | 1026:29:00 | 417:09:00  | 71:59:00             |
| GOTERM_CC_FAT   | GO:0045211~postsynaptic membrane               | 14  | 2.7613412228796843 | 3.567111284781752E-5  | 796:41:00  | 268:52:00  | 322:33:00            |
| GOTERM_MF_FAT   | GO:0022836~gated channel activity              | 21  | 4.142011834319527  | 3.877546391435018E-5  | 910:08:00  | 797:58:00  | 651:00:00            |
| UP_SEQ_FEATURE  | glycosylation site:N-linked (GlcNAc...)        | 131 | 25.83826429980276  | 4.085362418502988E-5  | 853:57:00  | 506:51:00  | 1077:47:00           |
| GOTERM_BP_FAT   | GO:0016337~cell-cell adhesion                  | 19  | 3.7475345167652856 | 4.2267139339169746E-5 | 565:04:00  | 445:15:00  | 757:01:00            |
| SP_PIR_KEYWORDS | cell membrane                                  | 72  | 14.201183431952662 | 4.720407719723564E-5  | 404:44:00  | 315:43:00  | 922:36:00            |
| UP_SEQ_FEATURE  | domain:EGF-like 7                              | 7   | 1.3806706114398422 | 4.7720887921960266E-5 | 218:09:00  | 911:23:00  | 865:50:00            |
| GOTERM_BP_FAT   | GO:0006468~protein amino acid phosphorylati    | 35  | 6.903353057199212  | 5.434006171722484E-5  | 749:21:00  | 867:49:00  | 316:46:00            |
| GOTERM_BP_FAT   | GO:0007268~synaptic transmission               | 16  | 3.155818540433925  | 5.935332277282263E-5  | 663:27:00  | 547:32:00  | 54:54:00             |
| GOTERM_MF_FAT   | GO:0008092~cytoskeletal protein binding        | 26  | 5.128205128205128  | 6.724642346715097E-5  | 327:53:00  | 900:18:00  | 167:29:00            |
| KEGG_PATHWAY    | mmu05412:Arrhythmogenic right ventricular ca   | 10  | 1.9723865877712032 | 7.162616032748928E-5  | 773:48:00  | 980:40:00  | 980:40:00            |
| UP_SEQ_FEATURE  | topological domain:Cytoplasmic                 | 109 | 21.499013806706113 | 7.622400559001152E-5  | 760:12:00  | 976:23:00  | 1051:02:00           |
| INTERPRO        | IPR013111:EGF, extracellular                   | 10  | 1.9723865877712032 | 8.406240621163201E-5  | 874:29:00  | 1002:52:00 | 540:11:00            |
| INTERPRO        | IPR001245:Tyrosine protein kinase              | 13  | 2.564102564102564  | 8.75466300063645E-5   | 475:28:00  | 1020:46:00 | 68:45:00             |
| UP_TISSUE       | Olfactory brain                                | 18  | 3.5502958579881656 | 8.79387011137347E-5   | 532:31:00  | 386:41:00  | 555:10:00            |
| INTERPRO        | IPR008957:Fibronectin, type III-like fold      | 16  | 3.155818540433925  | 1.0543651589278379E-4 | 154:35:00  | 365:08:00  | 717:29:00            |
| SMART           | SM00231:FA58C                                  | 7   | 1.3806706114398422 | 1.0582065830491764E-4 | 491:35:00  | 533:14:00  | 202:39:00            |
| INTERPRO        | IPR013098:Immunoglobulin I-set                 | 13  | 2.564102564102564  | 1.1027626222350169E-4 | 50:15:00   | 310:52:00  | 1031:52:00           |
| GOTERM_CC_FAT   | GO:0043005~neuron projection                   | 19  | 3.7475345167652856 | 1.199918528708406E-4  | 732:12:00  | 244:49:00  | 407:24:00            |
| SP_PIR_KEYWORDS | postsynaptic cell membrane                     | 12  | 2.366863905325444  | 1.342694342862374E-4  | 909:40:00  | 476:06:00  | 06:57:00             |
| SMART           | SM00282:LamG                                   | 9   | 1.7751479289940828 | 1.4160311271268225E-4 | 863:35:00  | 64:44:00   | 245:17:00            |
| INTERPRO        | IPR000152:EGF-type aspartate/asparagine hydr   | 11  | 2.1696252465483234 | 1.5383126466188957E-4 | 563:03:00  | 481:55:00  | 252:26:00            |
| GOTERM_MF_FAT   | GO:0030695~GTPase regulator activity           | 23  | 4.536489151873767  | 1.6151259639650775E-4 | 865:12:00  | 489:30:00  | 959:47:00            |
| GOTERM_BP_FAT   | GO:0031175~neuron projection development       | 17  | 3.353057199211045  | 1.7454846509913372E-4 | 233:30:00  | 650:41:00  | 203:08:00            |
| GOTERM_CC_FAT   | GO:0030054~cell junction                       | 28  | 5.522682445759369  | 1.8646576533855964E-4 | 107:36:00  | 706:03:00  | 663:42:00            |
| GOTERM_BP_FAT   | GO:0006811~ion transport                       | 36  | 7.100591715976331  | 1.933951643420524E-4  | 350:38:00  | 162:57:00  | 335:59:00            |
| GOTERM_CC_FAT   | GO:0042995~cell projection                     | 32  | 6.31163708086785   | 1.9407864006446853E-4 | 712:02:00  | 272:30:00  | 608:47:00            |
| GOTERM_MF_FAT   | GO:0060589~nucleoside-triphosphatase regulat   | 23  | 4.536489151873767  | 1.9923703046150962E-4 | 284:12:00  | 134:04:00  | 606:46:00            |
| INTERPRO        | IPR001828:Extracellular ligand-binding receptc | 8   | 1.5779092702169626 | 2.1353906355970812E-4 | 872:03:00  | 354:37:00  | 622:19:00            |
| GOTERM_BP_FAT   | GO:0016310~phosphorylation                     | 36  | 7.100591715976331  | 2.2597397246061187E-4 | 486:33:00  | 107:10:00  | 35:15:00             |
| GOTERM_MF_FAT   | GO:0004672~protein kinase activity             | 31  | 6.11439842209073   | 2.2979702464974284E-4 | 155:36:00  | 551:22:00  | 749:22:00            |
| SP_PIR_KEYWORDS | cytoplasm                                      | 109 | 21.499013806706113 | 2.369909981732898E-4  | 574:26:00  | 142:12:00  | 242:59:00            |
| SP_PIR_KEYWORDS | cell junction                                  | 24  | 4.733727810650888  | 2.494263110411946E-4  | 475:39:00  | 820:29:00  | 609:31:00            |
| KEGG_PATHWAY    | mmu04360:Axon guidance                         | 12  | 2.366863905325444  | 3.003736776649717E-4  | 530:59:00  | 966:53:00  | 69:32:00             |
| GOTERM_MF_FAT   | GO:0004713~protein tyrosine kinase activity    | 14  | 2.7613412228796843 | 3.1303502140898627E-4 | 876:36:00  | 355:43:00  | 234:28:00            |
| UP_TISSUE       | Medulla oblongata                              | 28  | 5.522682445759369  | 3.2371946687882383E-4 | 509:08:00  | 529:34:00  | 360:07:00            |
| UP_TISSUE       | Corpora quadrigemina                           | 29  | 5.719921104536489  | 3.4078465847800206E-4 | 498:30:00  | 1084:50:00 | 16:34:00             |

## Tabella 1

|                 |                                              |     |                    |                       |            |            |            |
|-----------------|----------------------------------------------|-----|--------------------|-----------------------|------------|------------|------------|
| KEGG_PATHWAY    | mmu05414:Dilated cardiomyopathy              | 10  | 1.9723865877712032 | 3.496355134836699E-4  | 304:32:00  | 914:44:00  | 508:28:00  |
| SMART           | SM00060:FN3                                  | 18  | 3.5502958579881656 | 3.6585233001187325E-4 | 966:59:00  | 615:53:00  | 778:27:00  |
| GOTERM_MF_FAT   | GO:0008066~glutamate receptor activity       | 7   | 1.3806706114398422 | 3.769666446353763E-4  | 985:20:00  | 767:15:00  | 342:20:00  |
| GOTERM_MF_FAT   | GO:0015276~ligand-gated ion channel activity | 11  | 2.1696252465483234 | 3.897717189580962E-4  | 597:13:00  | 737:34:00  | 1050:47:00 |
| GOTERM_MF_FAT   | GO:0022834~ligand-gated channel activity     | 11  | 2.1696252465483234 | 3.897717189580962E-4  | 597:13:00  | 737:34:00  | 1050:47:00 |
| GOTERM_CC_FAT   | GO:0014069~postsynaptic density              | 8   | 1.5779092702169626 | 4.1248218471140723E-4 | 558:56:00  | 744:02:00  | 686:27:00  |
| SP_PIR_KEYWORDS | kinase                                       | 35  | 6.903353057199212  | 4.2105089925979176E-4 | 303:05:00  | 741:28:00  | 714:42:00  |
| INTERPRO        | IPR000719:Protein kinase, core               | 27  | 5.325443786982249  | 4.614843311645163E-4  | 1013:16:00 | 119:54:00  | 737:12:00  |
| GOTERM_MF_FAT   | GO:0001882~nucleoside binding                | 62  | 12.22879684418146  | 4.644201563309256E-4  | 1006:17:00 | 265:02:00  | 631:34:00  |
| UP_SEQ_FEATURE  | domain:EGF-like 6                            | 7   | 1.3806706114398422 | 4.737372433381086E-4  | 982:15:00  | 1065:57:00 | 614:44:00  |
| GOTERM_MF_FAT   | GO:0030554~adenyl nucleotide binding         | 61  | 12.03155818540434  | 5.409840507024636E-4  | 216:41:00  | 289:22:00  | 01:08:00   |
| GOTERM_MF_FAT   | GO:0005524~ATP binding                       | 58  | 11.439842209072978 | 5.968656373142921E-4  | 796:25:00  | 494:49:00  | 840:32:00  |
| GOTERM_BP_FAT   | GO:0048666~neuron development                | 19  | 3.7475345167652856 | 5.973985260171583E-4  | 353:34:00  | 69:47:00   | 1091:29:00 |
| GOTERM_BP_FAT   | GO:0046903~secretion                         | 16  | 3.155818540433925  | 6.293309609414735E-4  | 754:21:00  | 393:39:00  | 673:05:00  |
| UP_SEQ_FEATURE  | domain:Laminin G-like 2                      | 6   | 1.183431952662722  | 6.299170577548416E-4  | 419:33:00  | 517:21:00  | 673:22:00  |
| UP_SEQ_FEATURE  | domain:Laminin G-like 1                      | 6   | 1.183431952662722  | 6.299170577548416E-4  | 419:33:00  | 517:21:00  | 673:22:00  |
| UP_SEQ_FEATURE  | domain:EGF-like 5                            | 7   | 1.3806706114398422 | 6.347063921081768E-4  | 1003:05:00 | 1085:44:00 | 223:29:00  |
| PIR_SUPERFAMILY | PIRSF002504:cadherin                         | 5   | 0.9861932938856016 | 6.361023268411918E-4  | 783:52:00  | 968:53:00  | 968:53:00  |
| UP_SEQ_FEATURE  | domain:Ig-like C2-type 3                     | 10  | 1.9723865877712032 | 6.420936443568575E-4  | 871:26:00  | 1023:12:00 | 241:50:00  |
| GOTERM_BP_FAT   | GO:0030030~cell projection organization      | 20  | 3.9447731755424065 | 6.456003807086591E-4  | 900:10:00  | 451:54:00  | 185:33:00  |
| GOTERM_MF_FAT   | GO:0001883~purine nucleoside binding         | 61  | 12.03155818540434  | 6.825443772591933E-4  | 374:52:00  | 639:34:00  | 1089:01:00 |
| GOTERM_BP_FAT   | GO:0030182~neuron differentiation            | 23  | 4.536489151873767  | 7.02371197046171E-4   | 201:29:00  | 324:39:00  | 285:36:00  |
| GOTERM_BP_FAT   | GO:0044057~regulation of system process      | 15  | 2.9585798816568047 | 7.397716872211619E-4  | 473:57:00  | 492:58:00  | 364:49:00  |
| GOTERM_BP_FAT   | GO:0007242~intracellular signaling cascade   | 41  | 8.086785009861932  | 7.427096023466387E-4  | 692:40:00  | 200:34:00  | 87:26:00   |
| GOTERM_BP_FAT   | GO:0048858~cell projection morphogenesis     | 15  | 2.9585798816568047 | 7.766972308070924E-4  | 901:04:00  | 18:15:00   | 142:01:00  |
| GOTERM_MF_FAT   | GO:0032559~adenyl ribonucleotide binding     | 58  | 11.439842209072978 | 7.896357107252106E-4  | 286:21:00  | 152:28:00  | 820:53:00  |
| UP_SEQ_FEATURE  | short sequence motif:PDZ-binding             | 9   | 1.7751479289940828 | 7.922936608443345E-4  | 832:47:00  | 280:21:00  | 880:26:00  |
| GOTERM_BP_FAT   | GO:0019226~transmission of nerve impulse     | 16  | 3.155818540433925  | 7.977148044870727E-4  | 254:55:00  | 41:57:00   | 57:32:00   |
| GOTERM_BP_FAT   | GO:0006303~double-strand break repair via nc | 4   | 0.7889546351084813 | 8.689592768058796E-4  | 1085:19:00 | 412:54:00  | 665:06:00  |
| GOTERM_BP_FAT   | GO:0000726~non-recombinational repair        | 4   | 0.7889546351084813 | 8.689592768058796E-4  | 1085:19:00 | 412:54:00  | 665:06:00  |
| KEGG_PATHWAY    | mmu05410:Hypertrophic cardiomyopathy (HCM)   | 9   | 1.7751479289940828 | 8.9572004135602E-4    | 188:34:00  | 1048:00:00 | 326:58:00  |
| SP_PIR_KEYWORDS | signal                                       | 104 | 20.51282051282051  | 9.097979198293663E-4  | 878:54:00  | 963:44:00  | 735:27:00  |
| GOTERM_BP_FAT   | GO:0007411~axon guidance                     | 10  | 1.9723865877712032 | 9.638440080093935E-4  | 129:53:00  | 237:14:00  | 837:36:00  |
| SP_PIR_KEYWORDS | atp-binding                                  | 53  | 10.453648915187378 | 9.695440484593931E-4  | 25:03:00   | 86:59:00   | 388:50:00  |
| GOTERM_MF_FAT   | GO:0005234~extracellular-glutamate-gated ion | 5   | 0.9861932938856016 | 9.804640813241765E-4  | 1087:07:00 | 123:38:00  | 99:39:00   |
| GOTERM_MF_FAT   | GO:0004970~ionotropic glutamate receptor act | 5   | 0.9861932938856016 | 9.804640813241765E-4  | 1087:07:00 | 123:38:00  | 99:39:00   |
| INTERPRO        | IPR019594:Glutamate receptor, L-glutamate/gl | 5   | 0.9861932938856016 | 494:26:00             | 361:09:00  | 788:31:00  | 1082:02:00 |
| INTERPRO        | IPR015683:Glutamate receptor-related         | 5   | 0.9861932938856016 | 494:26:00             | 361:09:00  | 788:31:00  | 1082:02:00 |
| INTERPRO        | IPR001320:Ionotropic glutamate receptor      | 5   | 0.9861932938856016 | 494:26:00             | 361:09:00  | 788:31:00  | 1082:02:00 |
| INTERPRO        | IPR001508:NMDA receptor                      | 5   | 0.9861932938856016 | 494:26:00             | 361:09:00  | 788:31:00  | 1082:02:00 |
| UP_SEQ_FEATURE  | binding site:Glutamate                       | 4   | 0.7889546351084813 | 293:54:00             | 640:50:00  | 307:52:00  | 426:05:00  |
| UP_SEQ_FEATURE  | region of interest:Glutamate binding         | 4   | 0.7889546351084813 | 293:54:00             | 640:50:00  | 307:52:00  | 426:05:00  |
| INTERPRO        | IPR017441:Protein kinase, ATP binding site   | 25  | 4.930966469428008  | 50:10:00              | 519:03:00  | 1064:02:00 | 983:42:00  |
| GOTERM_BP_FAT   | GO:0032990~cell part morphogenesis           | 15  | 2.9585798816568047 | 900:30:00             | 705:13:00  | 1050:23:00 | 725:20:00  |

## Tabella 1

|                 |                                                |     |                    |            |            |            |            |
|-----------------|------------------------------------------------|-----|--------------------|------------|------------|------------|------------|
| GOTERM_BP_FAT   | GO:0007243~protein kinase cascade              | 16  | 3.155818540433925  | 1015:16:00 | 272:59:00  | 107:33:00  | 148:47:00  |
| GOTERM_MF_FAT   | GO:0003779~actin binding                       | 18  | 3.5502958579881656 | 360:31:00  | 323:17:00  | 316:46:00  | 314:40:00  |
| SMART           | SM00219:TyrKc                                  | 13  | 2.564102564102564  | 455:15:00  | 217:12:00  | 873:22:00  | 743:12:00  |
| GOTERM_MF_FAT   | GO:0043167~ion binding                         | 128 | 25.2465483234714   | 864:51:00  | 84:21:00   | 812:42:00  | 800:44:00  |
| GOTERM_MF_FAT   | GO:0046873~metal ion transmembrane transp      | 18  | 3.5502958579881656 | 1021:39:00 | 821:25:00  | 415:37:00  | 1034:50:00 |
| GOTERM_MF_FAT   | GO:0019904~protein domain specific binding     | 14  | 2.7613412228796843 | 300:16:00  | 1028:12:00 | 409:24:00  | 1088:58:00 |
| GOTERM_BP_FAT   | GO:0003001~generation of a signal involved in  | 9   | 1.7751479289940828 | 927:06:00  | 564:02:00  | 595:54:00  | 438:42:00  |
| GOTERM_MF_FAT   | GO:0005230~extracellular ligand-gated ion cha  | 8   | 1.5779092702169626 | 258:40:00  | 986:00:00  | 478:14:00  | 00:05:00   |
| UP_TISSUE       | Olfactory bulb                                 | 15  | 2.9585798816568047 | 260:19:00  | 993:57:00  | 636:12:00  | 123:12:00  |
| GOTERM_CC_FAT   | GO:0005856~cytoskeleton                        | 48  | 9.467455621301776  | 195:58:00  | 68:17:00   | 1008:02:00 | 275:52:00  |
| UP_SEQ_FEATURE  | repeat:WD 6                                    | 13  | 2.564102564102564  | 960:35:00  | 02:34:00   | 425:28:00  | 713:11:00  |
| GOTERM_MF_FAT   | GO:0000166~nucleotide binding                  | 78  | 15.384615384615385 | 237:33:00  | 603:27:00  | 610:51:00  | 64:53:00   |
| GOTERM_MF_FAT   | GO:0005262~calcium channel activity            | 8   | 1.5779092702169626 | 06:22:00   | 341:43:00  | 864:44:00  | 377:03:00  |
| GOTERM_BP_FAT   | GO:0051969~regulation of transmission of nen   | 10  | 1.9723865877712032 | 230:15:00  | 657:07:00  | 243:32:00  | 731:41:00  |
| GOTERM_MF_FAT   | GO:0005083~small GTPase regulator activity     | 15  | 2.9585798816568047 | 356:23:00  | 33:27:00   | 188:06:00  | 210:24:00  |
| GOTERM_MF_FAT   | GO:0005261~cation channel activity             | 16  | 3.155818540433925  | 524:00:00  | 635:53:00  | 71:17:00   | 616:42:00  |
| UP_SEQ_FEATURE  | domain:Cadherin 1                              | 7   | 1.3806706114398422 | 852:55:00  | 502:35:00  | 1027:35:00 | 590:53:00  |
| UP_SEQ_FEATURE  | domain:Cadherin 2                              | 7   | 1.3806706114398422 | 852:55:00  | 502:35:00  | 1027:35:00 | 590:53:00  |
| GOTERM_BP_FAT   | GO:0048812~neuron projection morphogenesi      | 13  | 2.564102564102564  | 855:57:00  | 954:11:00  | 494:42:00  | 806:25:00  |
| UP_SEQ_FEATURE  | transmembrane region                           | 141 | 27.810650887573964 | 586:11:00  | 683:57:00  | 435:34:00  | 251:51:00  |
| GOTERM_CC_FAT   | GO:0019898~extrinsic to membrane               | 25  | 4.930966469428008  | 687:21:00  | 634:01:00  | 713:20:00  | 78:53:00   |
| UP_SEQ_FEATURE  | repeat:WD 7                                    | 11  | 2.1696252465483234 | 216:52:00  | 135:03:00  | 107:02:00  | 755:32:00  |
| GOTERM_MF_FAT   | GO:0043169~cation binding                      | 125 | 24.65483234714004  | 269:25:00  | 616:26:00  | 511:32:00  | 172:14:00  |
| PIR_SUPERFAMILY | PIRSF000666:TyrPK_ephrin_receptor              | 4   | 0.7889546351084813 | 610:12:00  | 593:33:00  | 314:05:00  | 922:12:00  |
| GOTERM_MF_FAT   | GO:0046872~metal ion binding                   | 124 | 24.45759368836292  | 628:46:00  | 1077:34:00 | 61:23:00   | 732:52:00  |
| INTERPRO        | IPR000048:IQ calmodulin-binding region         | 9   | 1.7751479289940828 | 786:11:00  | 486:06:00  | 382:39:00  | 673:16:00  |
| GOTERM_BP_FAT   | GO:0031644~regulation of neurological system   | 10  | 1.9723865877712032 | 362:01:00  | 707:25:00  | 538:24:00  | 125:59:00  |
| GOTERM_BP_FAT   | GO:0030534~adult behavior                      | 9   | 1.7751479289940828 | 27:27:00   | 1039:52:00 | 485:23:00  | 156:37:00  |
| GOTERM_BP_FAT   | GO:0043087~regulation of GTPase activity       | 9   | 1.7751479289940828 | 27:27:00   | 1039:52:00 | 485:23:00  | 156:37:00  |
| INTERPRO        | IPR011042:Six-bladed beta-propeller, TolB-like | 6   | 1.183431952662722  | 575:13:00  | 257:42:00  | 58:54:00   | 718:07:00  |
| GOTERM_BP_FAT   | GO:0000902~cell morphogenesis                  | 18  | 3.5502958579881656 | 125:37:00  | 543:37:00  | 225:50:00  | 609:05:00  |
| UP_SEQ_FEATURE  | repeat:NHL 5                                   | 4   | 0.7889546351084813 | 89:13:00   | 1050:53:00 | 190:04:00  | 159:26:00  |
| INTERPRO        | IPR018097:EGF-like calcium-binding, conserve   | 9   | 1.7751479289940828 | 601:14:00  | 397:34:00  | 817:45:00  | 746:39:00  |
| GOTERM_MF_FAT   | GO:0004714~transmembrane receptor protein      | 7   | 1.3806706114398422 | 04:02:00   | 646:34:00  | 710:36:00  | 992:07:00  |
| SMART           | SM00079:PBPe                                   | 5   | 0.9861932938856016 | 572:33:00  | 1015:45:00 | 332:47:00  | 260:23:00  |
| UP_SEQ_FEATURE  | domain:Ig-like C2-type 1                       | 11  | 2.1696252465483234 | 89:58:00   | 573:24:00  | 941:46:00  | 02:21:00   |
| UP_SEQ_FEATURE  | domain:IQ                                      | 7   | 1.3806706114398422 | 21:09:00   | 65:01:00   | 555:58:00  | 402:07:00  |
| UP_SEQ_FEATURE  | domain:Cadherin 5                              | 6   | 1.183431952662722  | 1028:00:00 | 652:50:00  | 787:19:00  | 996:39:00  |
| INTERPRO        | IPR003599:Immunoglobulin subtype               | 18  | 3.5502958579881656 | 274:12:00  | 204:22:00  | 1013:53:00 | 704:27:00  |
| GOTERM_BP_FAT   | GO:0010648~negative regulation of cell comm    | 13  | 2.564102564102564  | 1077:08:00 | 833:48:00  | 523:09:00  | 287:47:00  |
| GOTERM_BP_FAT   | GO:0032940~secretion by cell                   | 13  | 2.564102564102564  | 1077:08:00 | 833:48:00  | 523:09:00  | 287:47:00  |
| INTERPRO        | IPR001849:Pleckstrin homology                  | 16  | 3.155818540433925  | 851:51:00  | 1063:49:00 | 485:16:00  | 433:48:00  |
| GOTERM_BP_FAT   | GO:0007156~homophilic cell adhesion            | 10  | 1.9723865877712032 | 808:30:00  | 613:37:00  | 1035:02:00 | 219:13:00  |
| UP_SEQ_FEATURE  | domain:Protein kinase                          | 25  | 4.930966469428008  | 453:07:00  | 541:11:00  | 132:29:00  | 1053:48:00 |

## Tabella 1

|                |                                               |    |                    |            |            |            |           |
|----------------|-----------------------------------------------|----|--------------------|------------|------------|------------|-----------|
| UP_SEQ_FEATURE | domain:Ig-like C2-type 2                      | 11 | 2.1696252465483234 | 81:04:00   | 88:11:00   | 242:39:00  | 785:17:00 |
| GOTERM_BP_FAT  | GO:0007409~axonogenesis                       | 12 | 2.366863905325444  | 723:01:00  | 162:52:00  | 525:30:00  | 959:36:00 |
| INTERPRO       | IPR003598:Immunoglobulin subtype 2            | 13 | 2.564102564102564  | 724:00:00  | 638:46:00  | 568:35:00  | 340:59:00 |
| UP_TISSUE      | Hypothalamus                                  | 22 | 4.339250493096647  | 94:07:00   | 180:47:00  | 937:46:00  | 742:44:00 |
| GOTERM_MF_FAT  | GO:0030165~PDZ domain binding                 | 5  | 0.9861932938856016 | 923:36:00  | 954:53:00  | 893:48:00  | 380:01:00 |
| INTERPRO       | IPR011993:Pleckstrin homology-type            | 17 | 3.353057199211045  | 394:23:00  | 23:33:00   | 607:07:00  | 186:04:00 |
| UP_SEQ_FEATURE | repeat:NHL 1                                  | 4  | 0.7889546351084813 | 897:47:00  | 63:08:00   | 792:24:00  | 115:50:00 |
| UP_SEQ_FEATURE | domain:Laminin G-like 4                       | 4  | 0.7889546351084813 | 897:47:00  | 63:08:00   | 792:24:00  | 115:50:00 |
| UP_SEQ_FEATURE | repeat:NHL 2                                  | 4  | 0.7889546351084813 | 897:47:00  | 63:08:00   | 792:24:00  | 115:50:00 |
| UP_SEQ_FEATURE | repeat:NHL 4                                  | 4  | 0.7889546351084813 | 897:47:00  | 63:08:00   | 792:24:00  | 115:50:00 |
| UP_SEQ_FEATURE | repeat:NHL 3                                  | 4  | 0.7889546351084813 | 897:47:00  | 63:08:00   | 792:24:00  | 115:50:00 |
| INTERPRO       | IPR009471:Teneurin intracellular, N-terminal  | 3  | 0.591715976331361  | 727:02:00  | 1011:15:00 | 118:43:00  | 270:16:00 |
| INTERPRO       | IPR006530:YD repeat                           | 3  | 0.591715976331361  | 727:02:00  | 1011:15:00 | 118:43:00  | 270:16:00 |
| UP_TISSUE      | Fetal brain                                   | 18 | 3.5502958579881656 | 816:05:00  | 270:27:00  | 603:19:00  | 978:23:00 |
| INTERPRO       | IPR016257:Tyrosine-protein kinase, ephrin rec | 4  | 0.7889546351084813 | 1039:27:00 | 247:49:00  | 404:33:00  | 260:01:00 |
| INTERPRO       | IPR000884:Thrombospondin, type 1 repeat       | 7  | 1.3806706114398422 | 175:44:00  | 854:14:00  | 174:46:00  | 85:44:00  |
| UP_SEQ_FEATURE | domain:Fibronectin type-III 3                 | 8  | 1.5779092702169626 | 500:58:00  | 1086:16:00 | 1046:52:00 | 282:07:00 |
| GOTERM_BP_FAT  | GO:0033554~cellular response to stress        | 21 | 4.142011834319527  | 720:25:00  | 302:37:00  | 258:52:00  | 205:51:00 |
| UP_SEQ_FEATURE | compositionally biased region:Poly-Ser        | 21 | 4.142011834319527  | 929:27:00  | 862:47:00  | 621:50:00  | 953:55:00 |
| GOTERM_BP_FAT  | GO:0050804~regulation of synaptic transmissi  | 9  | 1.7751479289940828 | 802:18:00  | 862:45:00  | 737:54:00  | 407:10:00 |
| UP_SEQ_FEATURE | repeat:YD 7                                   | 3  | 0.591715976331361  | 370:37:00  | 961:15:00  | 12:43:00   | 228:57:00 |
| UP_SEQ_FEATURE | repeat:YD 8                                   | 3  | 0.591715976331361  | 370:37:00  | 961:15:00  | 12:43:00   | 228:57:00 |
| UP_SEQ_FEATURE | repeat:YD 20                                  | 3  | 0.591715976331361  | 370:37:00  | 961:15:00  | 12:43:00   | 228:57:00 |
| UP_SEQ_FEATURE | repeat:YD 14                                  | 3  | 0.591715976331361  | 370:37:00  | 961:15:00  | 12:43:00   | 228:57:00 |
| UP_SEQ_FEATURE | repeat:YD 16                                  | 3  | 0.591715976331361  | 370:37:00  | 961:15:00  | 12:43:00   | 228:57:00 |
| UP_SEQ_FEATURE | repeat:YD 13                                  | 3  | 0.591715976331361  | 370:37:00  | 961:15:00  | 12:43:00   | 228:57:00 |
| UP_SEQ_FEATURE | repeat:YD 21                                  | 3  | 0.591715976331361  | 370:37:00  | 961:15:00  | 12:43:00   | 228:57:00 |
| UP_SEQ_FEATURE | repeat:YD 4                                   | 3  | 0.591715976331361  | 370:37:00  | 961:15:00  | 12:43:00   | 228:57:00 |
| UP_SEQ_FEATURE | repeat:YD 23                                  | 3  | 0.591715976331361  | 370:37:00  | 961:15:00  | 12:43:00   | 228:57:00 |
| UP_SEQ_FEATURE | repeat:YD 1                                   | 3  | 0.591715976331361  | 370:37:00  | 961:15:00  | 12:43:00   | 228:57:00 |
| UP_SEQ_FEATURE | domain:Teneurin N-terminal                    | 3  | 0.591715976331361  | 370:37:00  | 961:15:00  | 12:43:00   | 228:57:00 |
| UP_SEQ_FEATURE | repeat:YD 19                                  | 3  | 0.591715976331361  | 370:37:00  | 961:15:00  | 12:43:00   | 228:57:00 |
| UP_SEQ_FEATURE | repeat:YD 2                                   | 3  | 0.591715976331361  | 370:37:00  | 961:15:00  | 12:43:00   | 228:57:00 |
| UP_SEQ_FEATURE | repeat:YD 5                                   | 3  | 0.591715976331361  | 370:37:00  | 961:15:00  | 12:43:00   | 228:57:00 |
| UP_SEQ_FEATURE | repeat:YD 6                                   | 3  | 0.591715976331361  | 370:37:00  | 961:15:00  | 12:43:00   | 228:57:00 |
| UP_SEQ_FEATURE | repeat:YD 18                                  | 3  | 0.591715976331361  | 370:37:00  | 961:15:00  | 12:43:00   | 228:57:00 |
| UP_SEQ_FEATURE | repeat:YD 9                                   | 3  | 0.591715976331361  | 370:37:00  | 961:15:00  | 12:43:00   | 228:57:00 |
| UP_SEQ_FEATURE | repeat:YD 12                                  | 3  | 0.591715976331361  | 370:37:00  | 961:15:00  | 12:43:00   | 228:57:00 |
| UP_SEQ_FEATURE | repeat:YD 15                                  | 3  | 0.591715976331361  | 370:37:00  | 961:15:00  | 12:43:00   | 228:57:00 |
| UP_SEQ_FEATURE | repeat:YD 22                                  | 3  | 0.591715976331361  | 370:37:00  | 961:15:00  | 12:43:00   | 228:57:00 |
| UP_SEQ_FEATURE | repeat:YD 3                                   | 3  | 0.591715976331361  | 370:37:00  | 961:15:00  | 12:43:00   | 228:57:00 |
| UP_SEQ_FEATURE | repeat:YD 17                                  | 3  | 0.591715976331361  | 370:37:00  | 961:15:00  | 12:43:00   | 228:57:00 |
| UP_SEQ_FEATURE | repeat:YD 11                                  | 3  | 0.591715976331361  | 370:37:00  | 961:15:00  | 12:43:00   | 228:57:00 |
| UP_SEQ_FEATURE | repeat:YD 10                                  | 3  | 0.591715976331361  | 370:37:00  | 961:15:00  | 12:43:00   | 228:57:00 |



## Tabella 1

|                 |                                                |     |                    |            |            |            |            |
|-----------------|------------------------------------------------|-----|--------------------|------------|------------|------------|------------|
| GOTERM_BP_FAT   | GO:0032989~cellular component morphogene:      | 19  | 3.7475345167652856 | 456:11:00  | 94:41:00   | 03:37:00   | 92:41:00   |
| UP_TISSUE       | Head                                           | 59  | 11.637080867850099 | 802:13:00  | 884:13:00  | 254:33:00  | 716:31:00  |
| KEGG_PATHWAY    | mmu04010:MAPK signaling pathway                | 15  | 2.9585798816568047 | 975:34:00  | 1083:15:00 | 208:21:00  | 684:15:00  |
| UP_SEQ_FEATURE  | binding site:ATP                               | 27  | 5.325443786982249  | 857:01:00  | 515:17:00  | 136:26:00  | 537:49:00  |
| GOTERM_BP_FAT   | GO:0006302~double-strand break repair          | 6   | 1.183431952662722  | 829:12:00  | 486:56:00  | 864:10:00  | 249:22:00  |
| SP_PIR_KEYWORDS | DNA damage                                     | 13  | 2.564102564102564  | 193:41:00  | 535:03:00  | 956:58:00  | 1030:43:00 |
| INTERPRO        | IPR002126:Cadherin                             | 9   | 1.7751479289940828 | 1060:41:00 | 35:20:00   | 424:50:00  | 185:27:00  |
| GOTERM_BP_FAT   | GO:0009968~negative regulation of signal tran  | 12  | 2.366863905325444  | 609:15:00  | 477:07:00  | 459:36:00  | 1056:05:00 |
| GOTERM_MF_FAT   | GO:0005003~ephrin receptor activity            | 4   | 0.7889546351084813 | 80:46:00   | 564:40:00  | 922:15:00  | 426:17:00  |
| INTERPRO        | IPR001090:Ephrin receptor, ligand binding      | 4   | 0.7889546351084813 | 580:47:00  | 899:37:00  | 716:16:00  | 764:03:00  |
| INTERPRO        | IPR001258:NHL repeat                           | 4   | 0.7889546351084813 | 580:47:00  | 899:37:00  | 716:16:00  | 764:03:00  |
| INTERPRO        | IPR001426:Receptor tyrosine kinase, class V, c | 4   | 0.7889546351084813 | 580:47:00  | 899:37:00  | 716:16:00  | 764:03:00  |
| GOTERM_BP_FAT   | GO:0008344~adult locomotory behavior           | 7   | 1.3806706114398422 | 800:58:00  | 600:42:00  | 134:10:00  | 973:29:00  |
| GOTERM_BP_FAT   | GO:0043065~positive regulation of apoptosis    | 15  | 2.9585798816568047 | 435:46:00  | 951:54:00  | 168:02:00  | 877:21:00  |
| GOTERM_BP_FAT   | GO:0043068~positive regulation of programme    | 15  | 2.9585798816568047 | 71:08:00   | 939:15:00  | 436:53:00  | 414:17:00  |
| UP_SEQ_FEATURE  | signal peptide                                 | 104 | 20.51282051282051  | 381:45:00  | 58:15:00   | 125:01:00  | 60:19:00   |
| INTERPRO        | IPR015943:WD40/YVTN repeat-like                | 17  | 3.353057199211045  | 1061:27:00 | 268:56:00  | 933:14:00  | 02:11:00   |
| UP_TISSUE       | Spinal cord                                    | 24  | 4.733727810650888  | 514:35:00  | 985:28:00  | 282:30:00  | 443:38:00  |
| GOTERM_BP_FAT   | GO:0010942~positive regulation of cell death   | 15  | 2.9585798816568047 | 321:13:00  | 406:41:00  | 67:09:00   | 712:55:00  |
| GOTERM_MF_FAT   | GO:0017076~purine nucleotide binding           | 66  | 13.017751479289942 | 625:42:00  | 620:16:00  | 143:07:00  | 529:57:00  |
| UP_TISSUE       | Ovary                                          | 18  | 3.5502958579881656 | 433:10:00  | 297:30:00  | 773:38:00  | 165:45:00  |
| SP_PIR_KEYWORDS | actin-binding                                  | 14  | 2.7613412228796843 | 906:46:00  | 643:21:00  | 909:49:00  | 825:43:00  |
| GOTERM_BP_FAT   | GO:0033152~immunoglobulin V(D)J recombina      | 3   | 0.591715976331361  | 885:52:00  | 172:31:00  | 427:10:00  | 107:40:00  |
| GOTERM_BP_FAT   | GO:0051056~regulation of small GTPase medi     | 14  | 2.7613412228796843 | 660:46:00  | 611:52:00  | 489:51:00  | 545:14:00  |
| GOTERM_CC_FAT   | GO:0042734~presynaptic membrane                | 5   | 0.9861932938856016 | 189:22:00  | 873:21:00  | 1085:12:00 | 730:45:00  |
| INTERPRO        | IPR013151:Immunoglobulin                       | 12  | 2.366863905325444  | 241:09:00  | 830:45:00  | 1003:09:00 | 41:38:00   |
| UP_SEQ_FEATURE  | nucleotide phosphate-binding region:ATP        | 39  | 7.6923076923076925 | 210:58:00  | 14:01:00   | 496:11:00  | 1026:21:00 |
| UP_SEQ_FEATURE  | zinc finger region:RING-type; atypical         | 5   | 0.9861932938856016 | 937:49:00  | 475:38:00  | 621:05:00  | 691:20:00  |
| UP_SEQ_FEATURE  | domain:Cadherin 4                              | 6   | 1.183431952662722  | 1042:18:00 | 824:21:00  | 646:24:00  | 440:57:00  |
| INTERPRO        | IPR001660:Sterile alpha motif SAM              | 8   | 1.5779092702169626 | 443:44:00  | 1049:36:00 | 105:13:00  | 943:04:00  |
| GOTERM_BP_FAT   | GO:0046578~regulation of Ras protein signal t  | 12  | 2.366863905325444  | 1006:44:00 | 802:12:00  | 793:14:00  | 719:10:00  |
| UP_SEQ_FEATURE  | domain:Cadherin 3                              | 6   | 1.183431952662722  | 41:48:00   | 826:36:00  | 792:22:00  | 929:45:00  |
| GOTERM_BP_FAT   | GO:0006887~exocytosis                          | 9   | 1.7751479289940828 | 194:53:00  | 07:05:00   | 814:45:00  | 531:28:00  |
| GOTERM_BP_FAT   | GO:0048667~cell morphogenesis involved in n    | 12  | 2.366863905325444  | 1030:00:00 | 182:11:00  | 820:26:00  | 360:23:00  |
| GOTERM_BP_FAT   | GO:0006974~response to DNA damage stimuli      | 16  | 3.155818540433925  | 394:09:00  | 1020:44:00 | 826:19:00  | 54:14:00   |
| GOTERM_MF_FAT   | GO:0032555~purine ribonucleotide binding       | 63  | 12.42603550295858  | 1067:03:00 | 649:21:00  | 1078:30:00 | 234:27:00  |
| GOTERM_MF_FAT   | GO:0032553~ribonucleotide binding              | 63  | 12.42603550295858  | 1067:03:00 | 649:21:00  | 1078:30:00 | 234:27:00  |
| SP_PIR_KEYWORDS | coiled coil                                    | 62  | 12.22879684418146  | 915:08:00  | 796:49:00  | 629:32:00  | 293:53:00  |
| GOTERM_CC_FAT   | GO:0030424~axon                                | 9   | 1.7751479289940828 | 1013:22:00 | 140:21:00  | 388:24:00  | 906:57:00  |
| SP_PIR_KEYWORDS | nucleotide-binding                             | 59  | 11.637080867850099 | 456:59:00  | 317:07:00  | 891:02:00  | 556:03:00  |
| GOTERM_CC_FAT   | GO:0019717~synaptosome                         | 7   | 1.3806706114398422 | 711:32:00  | 699:25:00  | 514:13:00  | 745:31:00  |
| INTERPRO        | IPR018159:Spectrin/alpha-actinin               | 5   | 0.9861932938856016 | 09:33:00   | 1070:22:00 | 931:42:00  | 391:00:00  |
| GOTERM_BP_FAT   | GO:0001964~startle response                    | 4   | 0.7889546351084813 | 599:12:00  | 729:13:00  | 855:56:00  | 783:02:00  |
| INTERPRO        | IPR001881:EGF-like calcium-binding             | 8   | 1.5779092702169626 | 539:14:00  | 193:47:00  | 342:57:00  | 766:53:00  |

## Tabella 1

|                 |                                                |    |                    |            |            |            |            |
|-----------------|------------------------------------------------|----|--------------------|------------|------------|------------|------------|
| GOTERM_MF_FAT   | GO:0000287~magnesium ion binding               | 20 | 3.9447731755424065 | 481:42:00  | 18:05:00   | 656:00:00  | 198:11:00  |
| GOTERM_BP_FAT   | GO:0007626~locomotory behavior                 | 14 | 2.7613412228796843 | 840:22:00  | 1002:36:00 | 859:10:00  | 543:54:00  |
| SP_PIR_KEYWORDS | calcium transport                              | 7  | 1.3806706114398422 | 391:22:00  | 96:15:00   | 497:20:00  | 948:11:00  |
| GOTERM_BP_FAT   | GO:0016192~vesicle-mediated transport          | 22 | 4.339250493096647  | 608:20:00  | 228:08:00  | 860:24:00  | 1061:03:00 |
| UP_TISSUE       | Spinal ganglion                                | 19 | 3.7475345167652856 | 64:23:00   | 255:09:00  | 1016:45:00 | 734:18:00  |
| INTERPRO        | IPR001202:WW/Rsp5/WWP                          | 6  | 1.183431952662722  | 278:22:00  | 47:06:00   | 1057:37:00 | 944:19:00  |
| SP_PIR_KEYWORDS | disulfide bond                                 | 83 | 16.370808678500985 | 975:39:00  | 900:34:00  | 766:27:00  | 866:39:00  |
| UP_SEQ_FEATURE  | repeat:WD 5                                    | 13 | 2.564102564102564  | 458:29:00  | 696:11:00  | 860:56:00  | 151:22:00  |
| UP_SEQ_FEATURE  | domain:F5/8 type C 2                           | 3  | 0.591715976331361  | 994:27:00  | 640:50:00  | 861:15:00  | 36:35:00   |
| UP_SEQ_FEATURE  | domain:F5/8 type C 1                           | 3  | 0.591715976331361  | 994:27:00  | 640:50:00  | 861:15:00  | 36:35:00   |
| UP_SEQ_FEATURE  | domain:Laminin G-like 3                        | 4  | 0.7889546351084813 | 738:30:00  | 1098:15:00 | 861:17:00  | 466:23:00  |
| INTERPRO        | IPR013761:Sterile alpha motif-type             | 7  | 1.3806706114398422 | 270:57:00  | 939:08:00  | 298:07:00  | 601:13:00  |
| GOTERM_BP_FAT   | GO:0043067~regulation of programmed cell de    | 25 | 4.930966469428008  | 328:17:00  | 1008:30:00 | 861:33:00  | 792:43:00  |
| GOTERM_BP_FAT   | GO:0007010~cytoskeleton organization           | 17 | 3.353057199211045  | 127:14:00  | 443:39:00  | 861:38:00  | 843:11:00  |
| GOTERM_BP_FAT   | GO:0030001~metal ion transport                 | 21 | 4.142011834319527  | 742:51:00  | 559:15:00  | 861:40:00  | 771:07:00  |
| UP_SEQ_FEATURE  | domain:SAM                                     | 7  | 1.3806706114398422 | 766:17:00  | 296:31:00  | 861:32:00  | 282:04:00  |
| SP_PIR_KEYWORDS | calcium channel                                | 6  | 1.183431952662722  | 51:43:00   | 151:38:00  | 987:35:00  | 532:38:00  |
| GOTERM_BP_FAT   | GO:0051656~establishment of organelle locali   | 5  | 0.9861932938856016 | 1054:55:00 | 247:20:00  | 861:42:00  | 1071:59:00 |
| UP_SEQ_FEATURE  | domain:EGF-like 4; calcium-binding             | 5  | 0.9861932938856016 | 119:51:00  | 767:55:00  | 861:36:00  | 228:21:00  |
| GOTERM_BP_FAT   | GO:0010941~regulation of cell death            | 25 | 4.930966469428008  | 1038:52:00 | 878:15:00  | 861:46:00  | 611:40:00  |
| SMART           | SM00615:EPH_lbd                                | 4  | 0.7889546351084813 | 42:08:00   | 992:18:00  | 812:40:00  | 787:50:00  |
| GOTERM_BP_FAT   | GO:0007167~enzyme linked receptor protein s    | 15 | 2.9585798816568047 | 463:20:00  | 815:12:00  | 861:48:00  | 542:23:00  |
| UP_SEQ_FEATURE  | repeat:WD 3                                    | 14 | 2.7613412228796843 | 634:49:00  | 883:14:00  | 861:47:00  | 467:36:00  |
| UP_SEQ_FEATURE  | domain:EGF-like 4                              | 6  | 1.183431952662722  | 441:05:00  | 399:36:00  | 861:47:00  | 647:48:00  |
| UP_TISSUE       | In vitro fertilized eggs                       | 13 | 2.564102564102564  | 358:11:00  | 266:24:00  | 474:07:00  | 745:18:00  |
| INTERPRO        | IPR003604:Zinc finger, U1-type                 | 4  | 0.7889546351084813 | 973:47:00  | 707:41:00  | 430:39:00  | 928:10:00  |
| GOTERM_BP_FAT   | GO:0042417~dopamine metabolic process          | 4  | 0.7889546351084813 | 595:58:00  | 301:11:00  | 861:50:00  | 534:11:00  |
| COG_ONTOLOGY    | Cell envelope biogenesis, outer membrane       | 4  | 0.7889546351084813 | 887:22:00  | 335:55:00  | 623:42:00  | 623:42:00  |
| UP_TISSUE       | Visual cortex                                  | 13 | 2.564102564102564  | 251:19:00  | 913:57:00  | 71:14:00   | 207:40:00  |
| UP_TISSUE       | Eye                                            | 52 | 10.256410256410255 | 275:28:00  | 523:13:00  | 183:01:00  | 590:06:00  |
| GOTERM_BP_FAT   | GO:0007269~neurotransmitter secretion          | 5  | 0.9861932938856016 | 728:12:00  | 1026:03:00 | 861:51:00  | 660:15:00  |
| UP_SEQ_FEATURE  | repeat:WD 1                                    | 14 | 2.7613412228796843 | 319:37:00  | 309:54:00  | 861:51:00  | 78:30:00   |
| UP_SEQ_FEATURE  | repeat:WD 2                                    | 14 | 2.7613412228796843 | 319:37:00  | 309:54:00  | 861:51:00  | 78:30:00   |
| SP_PIR_KEYWORDS | cell projection                                | 12 | 2.366863905325444  | 202:20:00  | 475:39:00  | 720:44:00  | 898:36:00  |
| SP_PIR_KEYWORDS | transport                                      | 56 | 11.045364891518737 | 176:40:00  | 283:09:00  | 12:52:00   | 924:16:00  |
| GOTERM_MF_FAT   | GO:0005548~phospholipid transporter activity   | 4  | 0.7889546351084813 | 137:01:00  | 954:53:00  | 1045:57:00 | 267:18:00  |
| GOTERM_BP_FAT   | GO:0006812~cation transport                    | 23 | 4.536489151873767  | 497:22:00  | 147:43:00  | 861:51:00  | 562:12:00  |
| SP_PIR_KEYWORDS | motor protein                                  | 9  | 1.7751479289940828 | 212:51:00  | 531:27:00  | 99:01:00   | 1025:10:00 |
| SMART           | SM00015:IQ                                     | 9  | 1.7751479289940828 | 919:41:00  | 646:33:00  | 934:55:00  | 477:07:00  |
| GOTERM_BP_FAT   | GO:0006928~cell motion                         | 18 | 3.5502958579881656 | 317:28:00  | 730:59:00  | 861:51:00  | 877:36:00  |
| UP_TISSUE       | Retina                                         | 26 | 5.128205128205128  | 280:11:00  | 103:06:00  | 181:41:00  | 617:12:00  |
| SP_PIR_KEYWORDS | dna repair                                     | 11 | 2.1696252465483234 | 1089:39:00 | 739:13:00  | 111:22:00  | 620:20:00  |
| INTERPRO        | IPR008266:Tyrosine protein kinase, active site | 8  | 1.5779092702169626 | 562:52:00  | 210:59:00  | 841:27:00  | 953:48:00  |
| GOTERM_BP_FAT   | GO:0033044~regulation of chromosome organ      | 4  | 0.7889546351084813 | 350:48:00  | 566:24:00  | 861:51:00  | 35:10:00   |

## Tabella 1

|                 |                                               |    |                    |            |            |           |            |
|-----------------|-----------------------------------------------|----|--------------------|------------|------------|-----------|------------|
| SMART           | SM00209:TSP1                                  | 7  | 1.3806706114398422 | 1020:29:00 | 288:06:00  | 240:38:00 | 398:19:00  |
| INTERPRO        | IPR019775:WD40 repeat, conserved site         | 14 | 2.7613412228796843 | 580:49:00  | 414:08:00  | 854:40:00 | 904:15:00  |
| GOTERM_BP_FAT   | GO:0042981~regulation of apoptosis            | 24 | 4.733727810650888  | 628:58:00  | 696:31:00  | 861:51:00 | 472:00:00  |
| GOTERM_BP_FAT   | GO:0006836~neurotransmitter transport         | 7  | 1.3806706114398422 | 604:59:00  | 251:15:00  | 861:51:00 | 740:46:00  |
| GOTERM_BP_FAT   | GO:0032318~regulation of Ras GTPase activit   | 7  | 1.3806706114398422 | 604:59:00  | 251:15:00  | 861:51:00 | 740:46:00  |
| INTERPRO        | IPR001680:WD40 repeat                         | 14 | 2.7613412228796843 | 563:56:00  | 219:28:00  | 857:08:00 | 666:30:00  |
| GOTERM_BP_FAT   | GO:0016358~dendrite development               | 5  | 0.9861932938856016 | 16:00:00   | 804:44:00  | 861:51:00 | 291:40:00  |
| GOTERM_MF_FAT   | GO:0003712~transcription cofactor activity    | 11 | 2.1696252465483234 | 87:46:00   | 957:28:00  | 747:24:00 | 230:20:00  |
| UP_SEQ_FEATURE  | repeat:WD 4                                   | 13 | 2.564102564102564  | 956:01:00  | 178:59:00  | 861:51:00 | 195:49:00  |
| INTERPRO        | IPR002017:Spectrin repeat                     | 4  | 0.7889546351084813 | 709:15:00  | 572:29:00  | 859:48:00 | 748:43:00  |
| SP_PIR_KEYWORDS | ubl conjugation                               | 23 | 4.536489151873767  | 626:12:00  | 419:11:00  | 476:58:00 | 407:14:00  |
| PIR_SUPERFAMILY | PIRSF002437:ionotropic glutamate receptor, AI | 3  | 0.591715976331361  | 585:18:00  | 949:12:00  | 963:35:00 | 385:20:00  |
| UP_SEQ_FEATURE  | domain:Fibronectin type-III 4                 | 6  | 1.183431952662722  | 978:11:00  | 146:32:00  | 861:51:00 | 750:30:00  |
| UP_SEQ_FEATURE  | domain:Ig-like C2-type 4                      | 6  | 1.183431952662722  | 978:11:00  | 146:32:00  | 861:51:00 | 750:30:00  |
| GOTERM_MF_FAT   | GO:0008509~anion transmembrane transporte     | 9  | 1.7751479289940828 | 468:18:00  | 778:46:00  | 575:50:00 | 22:20:00   |
| UP_SEQ_FEATURE  | compositionally biased region:Poly-Ala        | 15 | 2.9585798816568047 | 917:06:00  | 202:36:00  | 861:51:00 | 602:51:00  |
| INTERPRO        | IPR000008:C2 calcium-dependent membrane t     | 9  | 1.7751479289940828 | 552:19:00  | 601:12:00  | 861:11:00 | 333:09:00  |
| SP_PIR_KEYWORDS | neurotransmitter receptor                     | 5  | 0.9861932938856016 | 885:07:00  | 924:18:00  | 33:35:00  | 267:50:00  |
| INTERPRO        | IPR018029:C2 membrane targeting protein       | 8  | 1.5779092702169626 | 264:01:00  | 729:41:00  | 861:22:00 | 16:17:00   |
| UP_SEQ_FEATURE  | domain:C2 2                                   | 6  | 1.183431952662722  | 492:35:00  | 558:33:00  | 861:51:00 | 268:48:00  |
| UP_SEQ_FEATURE  | domain:C2 1                                   | 6  | 1.183431952662722  | 492:35:00  | 558:33:00  | 861:51:00 | 268:48:00  |
| SP_PIR_KEYWORDS | wd repeat                                     | 14 | 2.7613412228796843 | 234:51:00  | 343:05:00  | 515:25:00 | 715:58:00  |
| GOTERM_MF_FAT   | GO:0016564~transcription repressor activity   | 12 | 2.366863905325444  | 27:41:00   | 979:56:00  | 241:08:00 | 1060:26:00 |
| INTERPRO        | IPR002290:Serine/threonine protein kinase     | 14 | 2.7613412228796843 | 657:50:00  | 232:19:00  | 861:34:00 | 734:06:00  |
| INTERPRO        | IPR000233:Cadherin cytoplasmic region         | 4  | 0.7889546351084813 | 189:16:00  | 897:05:00  | 861:36:00 | 882:12:00  |
| GOTERM_CC_FAT   | GO:0030864~cortical actin cytoskeleton        | 4  | 0.7889546351084813 | 609:15:00  | 149:03:00  | 786:25:00 | 1089:04:00 |
| GOTERM_BP_FAT   | GO:0015914~phospholipid transport             | 4  | 0.7889546351084813 | 877:37:00  | 236:39:00  | 861:51:00 | 767:00:00  |
| UP_TISSUE       | Aorta and vein                                | 11 | 2.1696252465483234 | 1004:03:00 | 406:58:00  | 152:34:00 | 762:52:00  |
| GOTERM_BP_FAT   | GO:0033151~V(D)J recombination                | 3  | 0.591715976331361  | 980:49:00  | 933:22:00  | 861:51:00 | 463:18:00  |
| GOTERM_BP_FAT   | GO:0007017~microtubule-based process          | 12 | 2.366863905325444  | 23:46:00   | 149:57:00  | 861:51:00 | 829:17:00  |
| GOTERM_BP_FAT   | GO:0001505~regulation of neurotransmitter lev | 6  | 1.183431952662722  | 541:45:00  | 1039:52:00 | 861:51:00 | 656:57:00  |
| GOTERM_BP_FAT   | GO:0000904~cell morphogenesis involved in d   | 12 | 2.366863905325444  | 886:32:00  | 1088:05:00 | 861:51:00 | 1086:25:00 |
| GOTERM_MF_FAT   | GO:0005544~calcium-dependent phospholipid     | 4  | 0.7889546351084813 | 909:05:00  | 652:16:00  | 668:55:00 | 384:33:00  |
| SP_PIR_KEYWORDS | Immunoglobulin domain                         | 20 | 3.9447731755424065 | 437:48:00  | 452:06:00  | 798:13:00 | 190:16:00  |
| UP_SEQ_FEATURE  | compositionally biased region:Gln-rich        | 9  | 1.7751479289940828 | 997:03:00  | 97:41:00   | 01:00:00  | 445:13:00  |
| GOTERM_CC_FAT   | GO:0000922~spindle pole                       | 4  | 0.7889546351084813 | 96:17:00   | 1057:45:00 | 881:54:00 | 373:25:00  |
| SP_PIR_KEYWORDS | serine/threonine-protein kinase               | 18 | 3.5502958579881656 | 848:23:00  | 155:54:00  | 423:22:00 | 209:48:00  |
| SMART           | SM00150:SPEC                                  | 5  | 0.9861932938856016 | 730:43:00  | 107:57:00  | 259:06:00 | 462:34:00  |
| UP_SEQ_FEATURE  | domain:TSP type-1 4                           | 4  | 0.7889546351084813 | 866:16:00  | 1069:19:00 | 01:00:00  | 846:48:00  |
| UP_SEQ_FEATURE  | domain:EGF-like 9                             | 4  | 0.7889546351084813 | 866:16:00  | 1069:19:00 | 01:00:00  | 846:48:00  |
| UP_SEQ_FEATURE  | domain:PH                                     | 12 | 2.366863905325444  | 375:51:00  | 210:50:00  | 01:00:00  | 301:51:00  |
| GOTERM_MF_FAT   | GO:0004674~protein serine/threonine kinase a  | 19 | 3.7475345167652856 | 831:01:00  | 493:52:00  | 780:05:00 | 126:50:00  |
| INTERPRO        | IPR008271:Serine/threonine protein kinase, ac | 17 | 3.353057199211045  | 56:48:00   | 194:19:00  | 861:51:00 | 1054:26:00 |
| INTERPRO        | IPR011500:GPCR, family 3, nine cysteines reg  | 4  | 0.7889546351084813 | 840:30:00  | 1008:48:00 | 861:51:00 | 988:33:00  |

## Tabella 1

|                 |                                                |     |                    |            |            |           |            |
|-----------------|------------------------------------------------|-----|--------------------|------------|------------|-----------|------------|
| GOTERM_MF_FAT   | GO:0003774~motor activity                      | 9   | 1.7751479289940828 | 112:48:00  | 364:42:00  | 822:31:00 | 467:14:00  |
| SMART           | SM00112:CA                                     | 9   | 1.7751479289940828 | 139:11:00  | 78:10:00   | 796:38:00 | 415:26:00  |
| UP_TISSUE       | Pituitary                                      | 12  | 2.366863905325444  | 170:09:00  | 612:57:00  | 483:19:00 | 584:35:00  |
| GOTERM_MF_FAT   | GO:0005096~GTPase activator activity           | 11  | 2.1696252465483234 | 773:57:00  | 516:57:00  | 833:20:00 | 799:27:00  |
| KEGG_PATHWAY    | mmu04720:Long-term potentiation                | 6   | 1.183431952662722  | 295:14:00  | 759:56:00  | 533:14:00 | 697:23:00  |
| SMART           | SM00451:ZnF_U1                                 | 4   | 0.7889546351084813 | 96:50:00   | 600:58:00  | 840:30:00 | 880:25:00  |
| GOTERM_MF_FAT   | GO:0005516~calmodulin binding                  | 8   | 1.5779092702169626 | 289:27:00  | 842:42:00  | 844:03:00 | 1051:54:00 |
| GOTERM_BP_FAT   | GO:0007169~transmembrane receptor protein      | 11  | 2.1696252465483234 | 998:16:00  | 929:36:00  | 01:00:00  | 129:36:00  |
| SP_PIR_KEYWORDS | transmembrane                                  | 156 | 30.76923076923077  | 954:20:00  | 17:52:00   | 824:01:00 | 21:28:00   |
| INTERPRO        | IPR001589:Actinin-type, actin-binding, conserv | 4   | 0.7889546351084813 | 895:27:00  | 08:12:00   | 861:51:00 | 263:21:00  |
| INTERPRO        | IPR006652:Kelch repeat type 1                  | 6   | 1.183431952662722  | 196:20:00  | 759:06:00  | 861:51:00 | 962:59:00  |
| INTERPRO        | IPR015915:Kelch-type beta propeller            | 6   | 1.183431952662722  | 196:20:00  | 759:06:00  | 861:51:00 | 962:59:00  |
| GOTERM_CC_FAT   | GO:0044430~cytoskeletal part                   | 31  | 6.11439842209073   | 435:23:00  | 96:41:00   | 500:05:00 | 1038:01:00 |
| GOTERM_BP_FAT   | GO:0006281~DNA repair                          | 12  | 2.366863905325444  | 578:12:00  | 587:26:00  | 01:00:00  | 754:16:00  |
| KEGG_PATHWAY    | mmu04730:Long-term depression                  | 6   | 1.183431952662722  | 498:10:00  | 727:46:00  | 122:47:00 | 163:09:00  |
| INTERPRO        | IPR002172:Low density lipoprotein-receptor, cl | 5   | 0.9861932938856016 | 366:40:00  | 961:06:00  | 861:51:00 | 326:59:00  |
| SMART           | SM00408:IGc2                                   | 13  | 2.564102564102564  | 102:02:00  | 722:44:00  | 335:31:00 | 842:09:00  |
| GOTERM_MF_FAT   | GO:0045296~cadherin binding                    | 3   | 0.591715976331361  | 801:06:00  | 811:32:00  | 858:55:00 | 594:03:00  |
| GOTERM_BP_FAT   | GO:0051336~regulation of hydrolase activity    | 11  | 2.1696252465483234 | 328:22:00  | 960:08:00  | 01:00:00  | 302:24:00  |
| GOTERM_BP_FAT   | GO:0021952~central nervous system projectio    | 3   | 0.591715976331361  | 869:17:00  | 11:21:00   | 01:00:00  | 278:02:00  |
| SP_PIR_KEYWORDS | tyrosine-protein kinase                        | 8   | 1.5779092702169626 | 792:50:00  | 502:23:00  | 220:44:00 | 341:17:00  |
| INTERPRO        | IPR000569:HECT                                 | 4   | 0.7889546351084813 | 765:31:00  | 333:56:00  | 861:51:00 | 306:33:00  |
| SP_PIR_KEYWORDS | kelch repeat                                   | 6   | 1.183431952662722  | 940:07:00  | 680:36:00  | 231:51:00 | 498:55:00  |
| GOTERM_BP_FAT   | GO:0048168~regulation of neuronal synaptic p   | 4   | 0.7889546351084813 | 970:13:00  | 944:30:00  | 01:00:00  | 141:03:00  |
| GOTERM_BP_FAT   | GO:0007628~adult walking behavior              | 4   | 0.7889546351084813 | 970:13:00  | 944:30:00  | 01:00:00  | 141:03:00  |
| SMART           | SM00456:WW                                     | 6   | 1.183431952662722  | 1050:06:00 | 181:22:00  | 385:23:00 | 253:49:00  |
| SMART           | SM00454:SAM                                    | 8   | 1.5779092702169626 | 265:08:00  | 225:10:00  | 148:12:00 | 349:16:00  |
| UP_SEQ_FEATURE  | repeat:Kelch 6                                 | 5   | 0.9861932938856016 | 251:47:00  | 730:28:00  | 01:00:00  | 712:55:00  |
| GOTERM_BP_FAT   | GO:0015833~peptide transport                   | 5   | 0.9861932938856016 | 166:26:00  | 710:38:00  | 01:00:00  | 46:18:00   |
| GOTERM_BP_FAT   | GO:0007610~behavior                            | 18  | 3.5502958579881656 | 61:05:00   | 58:25:00   | 01:00:00  | 66:00:00   |
| SP_PIR_KEYWORDS | magnesium                                      | 18  | 3.5502958579881656 | 71:34:00   | 636:29:00  | 625:40:00 | 450:31:00  |
| GOTERM_BP_FAT   | GO:0001764~neuron migration                    | 6   | 1.183431952662722  | 715:18:00  | 438:37:00  | 01:00:00  | 420:49:00  |
| INTERPRO        | IPR002181:Fibrinogen, alpha/beta/gamma cha     | 4   | 0.7889546351084813 | 289:08:00  | 1026:29:00 | 861:51:00 | 653:51:00  |
| GOTERM_BP_FAT   | GO:0007270~nerve-nerve synaptic transmissic    | 4   | 0.7889546351084813 | 148:21:00  | 366:57:00  | 01:00:00  | 476:49:00  |
| GOTERM_BP_FAT   | GO:0010212~response to ionizing radiation      | 5   | 0.9861932938856016 | 548:52:00  | 423:35:00  | 01:00:00  | 1057:14:00 |
| GOTERM_BP_FAT   | GO:0048167~regulation of synaptic plasticity   | 5   | 0.9861932938856016 | 548:52:00  | 423:35:00  | 01:00:00  | 1057:14:00 |
| GOTERM_MF_FAT   | GO:0005089~Rho guanyl-nucleotide exchange      | 6   | 1.183431952662722  | 549:36:00  | 705:33:00  | 861:34:00 | 308:58:00  |
| PIR_SUPERFAMILY | PIRSF005608:metabotropic glutamate receptor    | 3   | 0.591715976331361  | 670:07:00  | 143:46:00  | 298:15:00 | 519:16:00  |
| GOTERM_MF_FAT   | GO:0005246~calcium channel regulator activity  | 3   | 0.591715976331361  | 887:35:00  | 432:16:00  | 861:41:00 | 846:34:00  |
| INTERPRO        | IPR001862:Membrane attack complex compon       | 3   | 0.591715976331361  | 106:02:00  | 215:49:00  | 861:51:00 | 89:36:00   |
| GOTERM_BP_FAT   | GO:0044065~regulation of respiratory system p  | 3   | 0.591715976331361  | 755:09:00  | 973:05:00  | 01:00:00  | 420:29:00  |
| GOTERM_BP_FAT   | GO:0002087~regulation of respiratory gaseous   | 3   | 0.591715976331361  | 755:09:00  | 973:05:00  | 01:00:00  | 420:29:00  |
| UP_SEQ_FEATURE  | domain:Fibrinogen C-terminal                   | 4   | 0.7889546351084813 | 424:05:00  | 804:17:00  | 01:00:00  | 06:31:00   |
| UP_SEQ_FEATURE  | domain:TSP type-1 3                            | 4   | 0.7889546351084813 | 424:05:00  | 804:17:00  | 01:00:00  | 06:31:00   |

## Tabella 1

|                 |                                                |    |                    |            |            |            |            |
|-----------------|------------------------------------------------|----|--------------------|------------|------------|------------|------------|
| GOTERM_MF_FAT   | GO:0003714~transcription corepressor activity  | 6  | 1.183431952662722  | 373:58:00  | 872:16:00  | 861:45:00  | 649:09:00  |
| GOTERM_BP_FAT   | GO:0006816~calcium ion transport               | 8  | 1.5779092702169626 | 1023:30:00 | 169:22:00  | 01:00:00   | 789:15:00  |
| GOTERM_BP_FAT   | GO:0048489~synaptic vesicle transport          | 4  | 0.7889546351084813 | 1041:55:00 | 808:30:00  | 01:00:00   | 953:43:00  |
| GOTERM_BP_FAT   | GO:0007613~memory                              | 4  | 0.7889546351084813 | 1041:55:00 | 808:30:00  | 01:00:00   | 953:43:00  |
| KEGG_PATHWAY    | mmu03450:Non-homologous end-joining            | 3  | 0.591715976331361  | 761:03:00  | 243:06:00  | 545:45:00  | 995:14:00  |
| GOTERM_MF_FAT   | GO:0003777~microtubule motor activity          | 6  | 1.183431952662722  | 363:43:00  | 142:38:00  | 861:49:00  | 1055:31:00 |
| SMART           | SM00179:EGF_CA                                 | 8  | 1.5779092702169626 | 98:02:00   | 379:39:00  | 823:59:00  | 551:36:00  |
| INTERPRO        | IPR011705:BTB/Kelch-associated                 | 5  | 0.9861932938856016 | 541:26:00  | 165:56:00  | 861:51:00  | 585:37:00  |
| GOTERM_BP_FAT   | GO:0022604~regulation of cell morphogenesis    | 7  | 1.3806706114398422 | 334:07:00  | 333:57:00  | 01:00:00   | 758:28:00  |
| COG_ONTOLOGY    | Signal transduction mechanisms                 | 3  | 0.591715976331361  | 849:07:00  | 776:23:00  | 238:59:00  | 1005:04:00 |
| UP_SEQ_FEATURE  | repeat:WD 8                                    | 5  | 0.9861932938856016 | 78:07:00   | 940:34:00  | 01:00:00   | 137:40:00  |
| SMART           | SM00233:PH                                     | 16 | 3.155818540433925  | 808:53:00  | 437:04:00  | 376:48:00  | 230:45:00  |
| UP_SEQ_FEATURE  | domain:WV 2                                    | 4  | 0.7889546351084813 | 1031:42:00 | 946:04:00  | 01:00:00   | 643:29:00  |
| UP_SEQ_FEATURE  | domain:WV 1                                    | 4  | 0.7889546351084813 | 1031:42:00 | 946:04:00  | 01:00:00   | 643:29:00  |
| GOTERM_CC_FAT   | GO:0044463~cell projection part                | 10 | 1.9723865877712032 | 491:51:00  | 728:51:00  | 830:47:00  | 316:09:00  |
| GOTERM_MF_FAT   | GO:0005244~voltage-gated ion channel activit   | 10 | 1.9723865877712032 | 679:59:00  | 19:00:00   | 861:51:00  | 838:48:00  |
| GOTERM_MF_FAT   | GO:0022832~voltage-gated channel activity      | 10 | 1.9723865877712032 | 679:59:00  | 19:00:00   | 861:51:00  | 838:48:00  |
| GOTERM_BP_FAT   | GO:0018958~phenol metabolic process            | 4  | 0.7889546351084813 | 120:23:00  | 874:29:00  | 01:00:00   | 945:04:00  |
| GOTERM_BP_FAT   | GO:0006584~catecholamine metabolic proces:     | 4  | 0.7889546351084813 | 120:23:00  | 874:29:00  | 01:00:00   | 945:04:00  |
| GOTERM_BP_FAT   | GO:0034311~diol metabolic process              | 4  | 0.7889546351084813 | 120:23:00  | 874:29:00  | 01:00:00   | 945:04:00  |
| GOTERM_BP_FAT   | GO:0009712~catechol metabolic process          | 4  | 0.7889546351084813 | 120:23:00  | 874:29:00  | 01:00:00   | 945:04:00  |
| UP_SEQ_FEATURE  | domain:Ig-like C2-type 5                       | 5  | 0.9861932938856016 | 438:43:00  | 70:43:00   | 01:00:00   | 939:54:00  |
| PIR_SUPERFAMILY | PIRSF036344:neurexin                           | 2  | 0.3944773175542406 | 690:27:00  | 636:58:00  | 726:28:00  | 78:49:00   |
| PIR_SUPERFAMILY | PIRSF500998:transient receptor potential catio | 2  | 0.3944773175542406 | 690:27:00  | 636:58:00  | 726:28:00  | 78:49:00   |
| INTERPRO        | IPR014847:FERM adjacent (FA)                   | 3  | 0.591715976331361  | 543:19:00  | 128:01:00  | 01:00:00   | 379:44:00  |
| GOTERM_MF_FAT   | GO:0016791~phosphatase activity                | 12 | 2.366863905325444  | 351:21:00  | 449:17:00  | 861:51:00  | 893:46:00  |
| GOTERM_BP_FAT   | GO:0080135~regulation of cellular response to  | 6  | 1.183431952662722  | 909:00:00  | 524:41:00  | 01:00:00   | 684:43:00  |
| KEGG_PATHWAY    | mmu04530:Tight junction                        | 8  | 1.5779092702169626 | 17:35:00   | 777:56:00  | 83:02:00   | 131:58:00  |
| SMART           | SM00409:IG                                     | 18 | 3.5502958579881656 | 709:13:00  | 207:32:00  | 1055:10:00 | 863:07:00  |
| GOTERM_CC_FAT   | GO:0044448~cell cortex part                    | 6  | 1.183431952662722  | 440:54:00  | 998:16:00  | 857:22:00  | 955:53:00  |
| UP_SEQ_FEATURE  | domain:MAM                                     | 3  | 0.591715976331361  | 683:53:00  | 419:33:00  | 01:00:00   | 127:05:00  |
| INTERPRO        | IPR00203:GPS                                   | 4  | 0.7889546351084813 | 1035:22:00 | 1084:28:00 | 01:00:00   | 442:08:00  |
| INTERPRO        | IPR003585:Neurexin/syndecan/glycophorin C      | 3  | 0.591715976331361  | 587:47:00  | 563:10:00  | 01:00:00   | 1000:30:00 |
| SP_PIR_KEYWORDS | transferase                                    | 47 | 9.270216962524655  | 789:53:00  | 690:56:00  | 860:11:00  | 366:55:00  |
| KEGG_PATHWAY    | mmu04080:Neuroactive ligand-receptor interac   | 12 | 2.366863905325444  | 178:47:00  | 518:51:00  | 1044:50:00 | 243:44:00  |
| GOTERM_BP_FAT   | GO:0051640~organelle localization              | 5  | 0.9861932938856016 | 88:27:00   | 970:59:00  | 01:00:00   | 106:27:00  |
| INTERPRO        | IPR005121:Phenylalanyl-tRNA synthetase, bet    | 2  | 0.3944773175542406 | 442:56:00  | 233:49:00  | 01:00:00   | 316:11:00  |
| UP_TISSUE       | Hippocampus                                    | 36 | 7.100591715976331  | 894:00:00  | 201:02:00  | 1061:53:00 | 549:52:00  |
| SP_PIR_KEYWORDS | calmodulin-binding                             | 7  | 1.3806706114398422 | 303:21:00  | 841:10:00  | 861:02:00  | 675:06:00  |
| GOTERM_CC_FAT   | GO:0015629~actin cytoskeleton                  | 11 | 2.1696252465483234 | 1057:09:00 | 323:51:00  | 860:53:00  | 96:56:00   |
| INTERPRO        | IPR003962:Fibronectin, type III subdomain      | 4  | 0.7889546351084813 | 336:18:00  | 252:11:00  | 01:00:00   | 368:23:00  |
| UP_SEQ_FEATURE  | domain:GPS                                     | 4  | 0.7889546351084813 | 1019:47:00 | 1005:58:00 | 01:00:00   | 537:55:00  |
| GOTERM_CC_FAT   | GO:0048787~presynaptic active zone membra      | 2  | 0.3944773175542406 | 152:08:00  | 421:44:00  | 861:14:00  | 23:02:00   |
| GOTERM_CC_FAT   | GO:0008328~ionotropic glutamate receptor coi   | 3  | 0.591715976331361  | 875:56:00  | 783:17:00  | 861:16:00  | 399:43:00  |

## Tabella 1

|                   |                                                  |    |                    |            |            |           |            |
|-------------------|--------------------------------------------------|----|--------------------|------------|------------|-----------|------------|
| GOTERM_BP_FAT     | GO:0060284~regulation of cell development        | 9  | 1.7751479289940828 | 754:55:00  | 1088:05:00 | 01:00:00  | 260:38:00  |
| UP_SEQ_FEATURE    | domain:FDX-ACB                                   | 2  | 0.3944773175542406 | 22:50:00   | 1034:22:00 | 01:00:00  | 893:53:00  |
| UP_SEQ_FEATURE    | region of interest:DACHbox-C                     | 2  | 0.3944773175542406 | 22:50:00   | 1034:22:00 | 01:00:00  | 893:53:00  |
| UP_SEQ_FEATURE    | region of interest:DACHbox-N                     | 2  | 0.3944773175542406 | 22:50:00   | 1034:22:00 | 01:00:00  | 893:53:00  |
| UP_SEQ_FEATURE    | region of interest:Essential for binding to NHEF | 2  | 0.3944773175542406 | 22:50:00   | 1034:22:00 | 01:00:00  | 893:53:00  |
| UP_SEQ_FEATURE    | disulfide bond                                   | 79 | 15.581854043392504 | 1071:02:00 | 471:42:00  | 01:00:00  | 97:57:00   |
| UP_SEQ_FEATURE    | repeat:Kelch 5                                   | 5  | 0.9861932938856016 | 759:14:00  | 370:45:00  | 01:00:00  | 337:31:00  |
| UP_SEQ_FEATURE    | domain:F5/8 type C                               | 3  | 0.591715976331361  | 1041:43:00 | 524:28:00  | 01:00:00  | 776:58:00  |
| INTERPRO          | IPR006539:ATPase, P-type, phospholipid-trans     | 3  | 0.591715976331361  | 14:52:00   | 563:17:00  | 01:00:00  | 1038:03:00 |
| INTERPRO          | IPR012675:Beta-grasp fold, ferredoxin-type       | 3  | 0.591715976331361  | 14:52:00   | 563:17:00  | 01:00:00  | 1038:03:00 |
| GOTERM_BP_FAT     | GO:0043523~regulation of neuron apoptosis        | 6  | 1.183431952662722  | 885:00:00  | 239:10:00  | 01:00:00  | 461:28:00  |
| GOTERM_BP_FAT     | GO:0021955~central nervous system neuron a       | 3  | 0.591715976331361  | 897:29:00  | 295:17:00  | 01:00:00  | 367:32:00  |
| GOTERM_BP_FAT     | GO:0031056~regulation of histone modifier        | 3  | 0.591715976331361  | 897:29:00  | 295:17:00  | 01:00:00  | 367:32:00  |
| GOTERM_BP_FAT     | GO:0007015~actin filament organization           | 5  | 0.9861932938856016 | 94:23:00   | 63:53:00   | 01:00:00  | 643:39:00  |
| KEGG_PATHWAY      | mmu04540:Gap junction                            | 6  | 1.183431952662722  | 1068:56:00 | 490:54:00  | 509:25:00 | 191:48:00  |
| GOTERM_MF_FAT     | GO:0008047~enzyme activator activity             | 12 | 2.366863905325444  | 196:01:00  | 952:53:00  | 861:51:00 | 350:04:00  |
| GOTERM_CC_FAT     | GO:0005654~nucleoplasm                           | 24 | 4.733727810650888  | 05:15:00   | 640:16:00  | 861:42:00 | 261:19:00  |
| GOTERM_BP_FAT     | GO:0015674~di-, tri-valent inorganic cation tra  | 9  | 1.7751479289940828 | 51:57:00   | 283:48:00  | 01:00:00  | 373:55:00  |
| GOTERM_MF_FAT     | GO:0017016~Ras GTPase binding                    | 5  | 0.9861932938856016 | 873:27:00  | 76:48:00   | 861:51:00 | 132:28:00  |
| UP_TISSUE         | Embryonic body below diaphragm region            | 3  | 0.591715976331361  | 55:40:00   | 314:44:00  | 718:39:00 | 233:06:00  |
| GOTERM_BP_FAT     | GO:0042770~DNA damage response, signal tr        | 5  | 0.9861932938856016 | 847:37:00  | 439:02:00  | 01:00:00  | 125:46:00  |
| SP_PIR_KEYWORDS   | sh3-binding                                      | 5  | 0.9861932938856016 | 27:14:00   | 725:24:00  | 861:49:00 | 1085:01:00 |
| GOTERM_MF_FAT     | GO:0016879~ligase activity, forming carbon-nit   | 10 | 1.9723865877712032 | 928:46:00  | 870:46:00  | 861:51:00 | 978:36:00  |
| GOTERM_MF_FAT     | GO:0008289~lipid binding                         | 15 | 2.9585798816568047 | 1006:53:00 | 894:11:00  | 861:51:00 | 64:26:00   |
| UP_SEQ_FEATURE    | domain:Rab-GAP TBC                               | 4  | 0.7889546351084813 | 442:21:00  | 835:36:00  | 01:00:00  | 327:04:00  |
| GOTERM_MF_FAT     | GO:0005088~Ras guanyl-nucleotide exchange        | 6  | 1.183431952662722  | 348:59:00  | 998:54:00  | 861:51:00 | 292:58:00  |
| SP_PIR_KEYWORDS   | voltage-gated channel                            | 8  | 1.5779092702169626 | 35:07:00   | 634:22:00  | 861:50:00 | 678:54:00  |
| GOTERM_MF_FAT     | GO:0004012~phospholipid-translocating ATPa:      | 3  | 0.591715976331361  | 487:54:00  | 108:59:00  | 861:51:00 | 512:37:00  |
| GOTERM_MF_FAT     | GO:0050839~cell adhesion molecule binding        | 3  | 0.591715976331361  | 487:54:00  | 108:59:00  | 861:51:00 | 512:37:00  |
| GOTERM_MF_FAT     | GO:0015247~aminophospholipid transporter a       | 3  | 0.591715976331361  | 487:54:00  | 108:59:00  | 861:51:00 | 512:37:00  |
| UP_SEQ_FEATURE    | domain:FAD-binding FR-type                       | 3  | 0.591715976331361  | 209:09:00  | 379:02:00  | 01:00:00  | 870:31:00  |
| UP_SEQ_FEATURE    | domain:TSP type-1 6                              | 3  | 0.591715976331361  | 209:09:00  | 379:02:00  | 01:00:00  | 870:31:00  |
| GOTERM_BP_FAT     | GO:0043576~regulation of respiratory gaseous     | 3  | 0.591715976331361  | 675:00:00  | 514:36:00  | 01:00:00  | 133:03:00  |
| GOTERM_BP_FAT     | GO:0007416~synaptogenesis                        | 3  | 0.591715976331361  | 675:00:00  | 514:36:00  | 01:00:00  | 133:03:00  |
| UP_TISSUE         | Mammary tumor. Metallothionien-TGF alpha m       | 14 | 2.7613412228796843 | 765:53:00  | 379:13:00  | 290:33:00 | 136:50:00  |
| SP_PIR_KEYWORDS   | chromatin regulator                              | 10 | 1.9723865877712032 | 404:20:00  | 557:46:00  | 861:51:00 | 1054:47:00 |
| PIR_SUPERFAMILY   | PIRSF037625:HERC protein                         | 2  | 0.3944773175542406 | 1044:38:00 | 788:44:00  | 834:31:00 | 679:40:00  |
| SMART             | SM00457:MACPF                                    | 3  | 0.591715976331361  | 865:35:00  | 868:15:00  | 837:29:00 | 433:44:00  |
| PIR_TISSUE_SPECIF | Expressed in testis.                             | 3  | 0.591715976331361  | 774:27:00  | 1089:34:00 | 375:25:00 | 375:25:00  |
| GOTERM_MF_FAT     | GO:0016881~acid-amino acid ligase activity       | 9  | 1.7751479289940828 | 13:14:00   | 438:47:00  | 861:51:00 | 1087:39:00 |
| UP_SEQ_FEATURE    | repeat:Kelch 4                                   | 5  | 0.9861932938856016 | 1061:57:00 | 626:42:00  | 01:00:00  | 494:56:00  |
| GOTERM_MF_FAT     | GO:0031267~small GTPase binding                  | 5  | 0.9861932938856016 | 710:40:00  | 190:18:00  | 861:51:00 | 29:53:00   |
| GOTERM_BP_FAT     | GO:0002790~peptide secretion                     | 4  | 0.7889546351084813 | 910:19:00  | 1039:18:00 | 01:00:00  | 159:51:00  |
| SMART             | SM00119:HECTc                                    | 4  | 0.7889546351084813 | 853:53:00  | 603:26:00  | 848:48:00 | 958:36:00  |

## Tabella 1

|                |                                               |     |                    |            |            |           |            |
|----------------|-----------------------------------------------|-----|--------------------|------------|------------|-----------|------------|
| INTERPRO       | IPR005821:Ion transport                       | 7   | 1.3806706114398422 | 384:12:00  | 533:06:00  | 01:00:00  | 124:48:00  |
| GOTERM_BP_FAT  | GO:0000226~microtubule cytoskeleton organiz   | 7   | 1.3806706114398422 | 159:51:00  | 84:31:00   | 01:00:00  | 584:26:00  |
| GOTERM_MF_FAT  | GO:0008134~transcription factor binding       | 13  | 2.564102564102564  | 1070:41:00 | 373:21:00  | 861:51:00 | 604:13:00  |
| UP_SEQ_FEATURE | active site:Proton acceptor                   | 26  | 5.128205128205128  | 513:24:00  | 393:38:00  | 01:00:00  | 894:07:00  |
| GOTERM_BP_FAT  | GO:0050905~neuromuscular process              | 5   | 0.9861932938856016 | 611:24:00  | 1052:32:00 | 01:00:00  | 697:53:00  |
| GOTERM_MF_FAT  | GO:0043130~ubiquitin binding                  | 3   | 0.591715976331361  | 190:56:00  | 1058:43:00 | 861:51:00 | 62:25:00   |
| GOTERM_BP_FAT  | GO:0016079~synaptic vesicle exocytosis        | 3   | 0.591715976331361  | 1004:36:00 | 733:43:00  | 01:00:00  | 128:59:00  |
| GOTERM_BP_FAT  | GO:0042060~wound healing                      | 7   | 1.3806706114398422 | 698:40:00  | 458:29:00  | 01:00:00  | 1070:18:00 |
| UP_SEQ_FEATURE | domain:BAR                                    | 3   | 0.591715976331361  | 804:46:00  | 703:03:00  | 01:00:00  | 166:26:00  |
| UP_TISSUE      | Testis                                        | 103 | 20.315581854043394 | 973:18:00  | 1003:15:00 | 704:53:00 | 714:06:00  |
| GOTERM_MF_FAT  | GO:0019899~enzyme binding                     | 11  | 2.1696252465483234 | 55:05:00   | 324:30:00  | 861:51:00 | 599:41:00  |
| UP_TISSUE      | Eyeball                                       | 13  | 2.564102564102564  | 1090:36:00 | 303:35:00  | 719:34:00 | 902:50:00  |
| UP_SEQ_FEATURE | repeat:Kelch 3                                | 5   | 0.9861932938856016 | 741:26:00  | 687:26:00  | 01:00:00  | 469:26:00  |
| UP_SEQ_FEATURE | repeat:Kelch 1                                | 5   | 0.9861932938856016 | 741:26:00  | 687:26:00  | 01:00:00  | 469:26:00  |
| UP_SEQ_FEATURE | repeat:Kelch 2                                | 5   | 0.9861932938856016 | 741:26:00  | 687:26:00  | 01:00:00  | 469:26:00  |
| GOTERM_BP_FAT  | GO:0035023~regulation of Rho protein signal t | 6   | 1.183431952662722  | 620:39:00  | 127:46:00  | 01:00:00  | 478:06:00  |
| INTERPRO       | IPR017986:WD40 repeat, region                 | 11  | 2.1696252465483234 | 993:56:00  | 541:50:00  | 01:00:00  | 1058:34:00 |
| GOTERM_CC_FAT  | GO:0016528~sarcooplasm                        | 4   | 0.7889546351084813 | 934:22:00  | 796:41:00  | 861:51:00 | 621:22:00  |
| SMART          | SM00186:FBG                                   | 4   | 0.7889546351084813 | 644:06:00  | 496:09:00  | 858:28:00 | 869:01:00  |
| GOTERM_CC_FAT  | GO:0043235~receptor complex                   | 6   | 1.183431952662722  | 798:36:00  | 206:55:00  | 861:51:00 | 707:30:00  |
| INTERPRO       | IPR000195:RabGAP/TBC                          | 4   | 0.7889546351084813 | 1061:32:00 | 899:58:00  | 01:00:00  | 374:21:00  |
| INTERPRO       | IPR016130:Protein-tyrosine phosphatase, activ | 6   | 1.183431952662722  | 612:49:00  | 1002:25:00 | 01:00:00  | 677:48:00  |
| GOTERM_MF_FAT  | GO:0051020~GTPase binding                     | 5   | 0.9861932938856016 | 283:53:00  | 886:40:00  | 01:00:00  | 794:50:00  |
| GOTERM_MF_FAT  | GO:0050543~icosatetraenoic acid binding       | 2   | 0.3944773175542406 | 222:38:00  | 655:57:00  | 01:00:00  | 761:59:00  |
| GOTERM_MF_FAT  | GO:0050542~icosanoid binding                  | 2   | 0.3944773175542406 | 222:38:00  | 655:57:00  | 01:00:00  | 761:59:00  |
| GOTERM_MF_FAT  | GO:0050544~arachidonic acid binding           | 2   | 0.3944773175542406 | 222:38:00  | 655:57:00  | 01:00:00  | 761:59:00  |
| INTERPRO       | IPR002319:Phenylalanyl-tRNA synthetase, cla   | 2   | 0.3944773175542406 | 947:43:00  | 442:50:00  | 01:00:00  | 724:54:00  |
| INTERPRO       | IPR002861:Reeler region                       | 2   | 0.3944773175542406 | 947:43:00  | 442:50:00  | 01:00:00  | 724:54:00  |
| GOTERM_BP_FAT  | GO:0050882~voluntary musculoskeletal mover    | 2   | 0.3944773175542406 | 850:17:00  | 1005:52:00 | 01:00:00  | 949:20:00  |
| UP_SEQ_FEATURE | domain:EF-hand 3                              | 6   | 1.183431952662722  | 446:17:00  | 701:31:00  | 01:00:00  | 30:14:00   |
| SMART          | SM00192:LDLa                                  | 5   | 0.9861932938856016 | 428:58:00  | 546:05:00  | 860:08:00 | 951:24:00  |
| UP_SEQ_FEATURE | domain:TSP type-1 1                           | 4   | 0.7889546351084813 | 60:19:00   | 21:02:00   | 01:00:00  | 1068:11:00 |
| UP_SEQ_FEATURE | domain:TSP type-1 2                           | 4   | 0.7889546351084813 | 60:19:00   | 21:02:00   | 01:00:00  | 1068:11:00 |
| GOTERM_CC_FAT  | GO:0045177~apical part of cell                | 8   | 1.5779092702169626 | 503:04:00  | 728:51:00  | 861:51:00 | 485:28:00  |
| GOTERM_MF_FAT  | GO:0032182~small conjugating protein binding  | 3   | 0.591715976331361  | 397:32:00  | 652:16:00  | 01:00:00  | 261:14:00  |
| UP_SEQ_FEATURE | compositionally biased region:Cys-rich        | 8   | 1.5779092702169626 | 199:49:00  | 906:16:00  | 01:00:00  | 404:07:00  |
| INTERPRO       | IPR000998:MAM                                 | 3   | 0.591715976331361  | 1016:22:00 | 872:03:00  | 01:00:00  | 187:03:00  |
| INTERPRO       | IPR017927:Ferredoxin reductase-type FAD-bin   | 3   | 0.591715976331361  | 1016:22:00 | 872:03:00  | 01:00:00  | 187:03:00  |
| GOTERM_BP_FAT  | GO:0016447~somatic recombination of immun     | 3   | 0.591715976331361  | 972:49:00  | 1012:49:00 | 01:00:00  | 135:29:00  |
| GOTERM_BP_FAT  | GO:0015844~monoamine transport                | 3   | 0.591715976331361  | 972:49:00  | 1012:49:00 | 01:00:00  | 135:29:00  |
| UP_SEQ_FEATURE | domain:N-terminal Ras-GEF                     | 3   | 0.591715976331361  | 159:29:00  | 550:37:00  | 01:00:00  | 705:26:00  |
| INTERPRO       | IPR001487:Bromodomain                         | 4   | 0.7889546351084813 | 64:15:00   | 292:25:00  | 01:00:00  | 819:48:00  |
| GOTERM_CC_FAT  | GO:0000151~ubiquitin ligase complex           | 5   | 0.9861932938856016 | 735:55:00  | 870:34:00  | 861:51:00 | 45:22:00   |
| GOTERM_BP_FAT  | GO:0032313~regulation of Rab GTPase activit   | 4   | 0.7889546351084813 | 286:02:00  | 379:03:00  | 01:00:00  | 419:29:00  |

## Tabella 1

|                 |                                               |    |                    |            |           |           |            |
|-----------------|-----------------------------------------------|----|--------------------|------------|-----------|-----------|------------|
| GOTERM_BP_FAT   | GO:0032483~regulation of Rab protein signal t | 4  | 0.7889546351084813 | 286:02:00  | 379:03:00 | 01:00:00  | 419:29:00  |
| UP_SEQ_FEATURE  | domain:Sushi 28                               | 2  | 0.3944773175542406 | 711:21:00  | 126:16:00 | 01:00:00  | 350:02:00  |
| UP_SEQ_FEATURE  | region of interest:Interaction with C1D       | 2  | 0.3944773175542406 | 711:21:00  | 126:16:00 | 01:00:00  | 350:02:00  |
| UP_SEQ_FEATURE  | domain:Sushi 27                               | 2  | 0.3944773175542406 | 711:21:00  | 126:16:00 | 01:00:00  | 350:02:00  |
| UP_SEQ_FEATURE  | domain:Sushi 25                               | 2  | 0.3944773175542406 | 711:21:00  | 126:16:00 | 01:00:00  | 350:02:00  |
| UP_SEQ_FEATURE  | domain:Reelin                                 | 2  | 0.3944773175542406 | 711:21:00  | 126:16:00 | 01:00:00  | 350:02:00  |
| UP_SEQ_FEATURE  | domain:Sushi 26                               | 2  | 0.3944773175542406 | 711:21:00  | 126:16:00 | 01:00:00  | 350:02:00  |
| UP_SEQ_FEATURE  | domain:Sushi 23                               | 2  | 0.3944773175542406 | 711:21:00  | 126:16:00 | 01:00:00  | 350:02:00  |
| UP_SEQ_FEATURE  | domain:Sushi 24                               | 2  | 0.3944773175542406 | 711:21:00  | 126:16:00 | 01:00:00  | 350:02:00  |
| UP_SEQ_FEATURE  | domain:Sushi 21                               | 2  | 0.3944773175542406 | 711:21:00  | 126:16:00 | 01:00:00  | 350:02:00  |
| UP_SEQ_FEATURE  | domain:Sushi 22                               | 2  | 0.3944773175542406 | 711:21:00  | 126:16:00 | 01:00:00  | 350:02:00  |
| GOTERM_BP_FAT   | GO:0007611~learning or memory                 | 6  | 1.183431952662722  | 500:51:00  | 985:52:00 | 01:00:00  | 308:02:00  |
| GOTERM_BP_FAT   | GO:0050878~regulation of body fluid levels    | 6  | 1.183431952662722  | 500:51:00  | 985:52:00 | 01:00:00  | 308:02:00  |
| GOTERM_CC_FAT   | GO:0005626~insoluble fraction                 | 21 | 4.142011834319527  | 219:33:00  | 96:49:00  | 861:51:00 | 606:08:00  |
| SP_PIR_KEYWORDS | neurogenesis                                  | 8  | 1.5779092702169626 | 868:30:00  | 74:28:00  | 861:51:00 | 42:22:00   |
| UP_SEQ_FEATURE  | compositionally biased region:Poly-Pro        | 15 | 2.9585798816568047 | 108:49:00  | 276:16:00 | 01:00:00  | 154:26:00  |
| GOTERM_CC_FAT   | GO:0031252~cell leading edge                  | 7  | 1.3806706114398422 | 71:11:00   | 719:26:00 | 861:51:00 | 878:25:00  |
| UP_SEQ_FEATURE  | calcium-binding region:2                      | 7  | 1.3806706114398422 | 920:08:00  | 415:33:00 | 01:00:00  | 109:52:00  |
| PIR_SUPERFAMILY | PIRSF037309:PP2A_PR55                         | 2  | 0.3944773175542406 | 304:49:00  | 202:47:00 | 861:32:00 | 212:06:00  |
| PIR_SUPERFAMILY | PIRSF037309:serine/threonine-protein phosph   | 2  | 0.3944773175542406 | 304:49:00  | 202:47:00 | 861:32:00 | 212:06:00  |
| PIR_SUPERFAMILY | PIRSF002446:voltage-dependent calcium char    | 2  | 0.3944773175542406 | 304:49:00  | 202:47:00 | 861:32:00 | 212:06:00  |
| SMART           | SM00294:4.1m                                  | 3  | 0.591715976331361  | 1001:36:00 | 744:13:00 | 861:35:00 | 450:17:00  |
| SMART           | SM00612:Kelch                                 | 6  | 1.183431952662722  | 21:41:00   | 512:36:00 | 861:36:00 | 481:04:00  |
| GOTERM_MF_FAT   | GO:0005085~guanyl-nucleotide exchange fact    | 8  | 1.5779092702169626 | 1013:51:00 | 200:06:00 | 01:00:00  | 562:06:00  |
| INTERPRO        | IPR019781:WD40 repeat, subgroup               | 11 | 2.1696252465483234 | 394:52:00  | 960:11:00 | 01:00:00  | 171:11:00  |
| SP_PIR_KEYWORDS | sh3 domain                                    | 10 | 1.9723865877712032 | 721:40:00  | 345:12:00 | 861:51:00 | 333:51:00  |
| SMART           | SM00239:C2                                    | 9  | 1.7751479289940828 | 371:28:00  | 316:06:00 | 861:38:00 | 1035:52:00 |
| INTERPRO        | IPR000798:Ezrin/radixin/moesin ERM            | 3  | 0.591715976331361  | 700:26:00  | 257:42:00 | 01:00:00  | 586:59:00  |
| GOTERM_BP_FAT   | GO:0019217~regulation of fatty acid metabolic | 3  | 0.591715976331361  | 887:30:00  | 498:57:00 | 01:00:00  | 57:52:00   |
| GOTERM_MF_FAT   | GO:0005099~Ras GTPase activator activity      | 5  | 0.9861932938856016 | 765:58:00  | 207:04:00 | 01:00:00  | 827:43:00  |
| GOTERM_MF_FAT   | GO:0005543~phospholipid binding               | 7  | 1.3806706114398422 | 258:12:00  | 716:59:00 | 01:00:00  | 71:36:00   |
| SP_PIR_KEYWORDS | repressor                                     | 16 | 3.155818540433925  | 899:15:00  | 193:26:00 | 861:51:00 | 698:24:00  |
| INTERPRO        | IPR000219:Dbp homolog (DH) domain             | 5  | 0.9861932938856016 | 834:36:00  | 980:40:00 | 01:00:00  | 01:13:00   |
| GOTERM_BP_FAT   | GO:0016568~chromatin modification             | 11 | 2.1696252465483234 | 271:13:00  | 783:34:00 | 01:00:00  | 720:06:00  |
| SP_PIR_KEYWORDS | lipid-binding                                 | 6  | 1.183431952662722  | 16:08:00   | 644:41:00 | 861:51:00 | 649:31:00  |
| UP_TISSUE       | Adult pancreatic islet                        | 5  | 0.9861932938856016 | 838:58:00  | 36:40:00  | 853:54:00 | 310:56:00  |
| UP_TISSUE       | Parthenogenote                                | 7  | 1.3806706114398422 | 114:31:00  | 375:14:00 | 853:55:00 | 844:58:00  |
| INTERPRO        | IPR001478:PDZ/DHR/GLGF                        | 8  | 1.5779092702169626 | 16:19:00   | 219:28:00 | 01:00:00  | 515:20:00  |
| SP_PIR_KEYWORDS | zinc-finger                                   | 40 | 7.889546351084813  | 352:18:00  | 373:51:00 | 861:51:00 | 247:47:00  |
| GOTERM_BP_FAT   | GO:0051960~regulation of nervous system dev   | 8  | 1.5779092702169626 | 915:09:00  | 587:26:00 | 01:00:00  | 352:14:00  |
| GOTERM_BP_FAT   | GO:0001558~regulation of cell growth          | 6  | 1.183431952662722  | 733:01:00  | 30:53:00  | 01:00:00  | 664:53:00  |
| GOTERM_CC_FAT   | GO:0030027~lamellipodium                      | 5  | 0.9861932938856016 | 1088:41:00 | 719:20:00 | 861:51:00 | 497:44:00  |
| KEGG_PATHWAY    | mmu05200:Pathways in cancer                   | 13 | 2.564102564102564  | 755:04:00  | 876:35:00 | 596:41:00 | 198:16:00  |
| INTERPRO        | IPR009091:Regulator of chromosome condens     | 3  | 0.591715976331361  | 692:41:00  | 910:44:00 | 01:00:00  | 1020:08:00 |



## Tabella 1

|               |                                                  |    |                    |            |            |            |            |
|---------------|--------------------------------------------------|----|--------------------|------------|------------|------------|------------|
| GOTERM_BP_FAT | GO:0046928~regulation of neurotransmitter se     | 3  | 0.591715976331361  | 88:38:00   | 709:45:00  | 01:00:00   | 232:54:00  |
| GOTERM_BP_FAT | GO:0016445~somatic diversification of immunc     | 3  | 0.591715976331361  | 88:38:00   | 709:45:00  | 01:00:00   | 232:54:00  |
| GOTERM_BP_FAT | GO:0016477~cell migration                        | 11 | 2.1696252465483234 | 374:18:00  | 155:25:00  | 01:00:00   | 336:07:00  |
| GOTERM_BP_FAT | GO:0006915~apoptosis                             | 18 | 3.5502958579881656 | 971:59:00  | 151:12:00  | 01:00:00   | 1014:38:00 |
| UP_TISSUE     | Fetal intestine                                  | 2  | 0.3944773175542406 | 269:03:00  | 739:50:00  | 859:41:00  | 218:30:00  |
| GOTERM_BP_FAT | GO:0016044~membrane organization                 | 12 | 2.366863905325444  | 693:15:00  | 613:51:00  | 01:00:00   | 719:51:00  |
| UP_TISSUE     | Adipose tissue                                   | 6  | 1.183431952662722  | 549:45:00  | 371:01:00  | 859:57:00  | 323:56:00  |
| INTERPRO      | IPR001452:Src homology-3 domain                  | 10 | 1.9723865877712032 | 344:36:00  | 260:34:00  | 01:00:00   | 547:02:00  |
| GOTERM_MF_FAT | GO:0004721~phosphoprotein phosphatase act        | 8  | 1.5779092702169626 | 74:58:00   | 905:40:00  | 01:00:00   | 1072:54:00 |
| COG_ONTOLOGY  | Cell division and chromosome partitioning / Cyt  | 3  | 0.591715976331361  | 959:21:00  | 900:48:00  | 1046:54:00 | 592:39:00  |
| GOTERM_MF_FAT | GO:0005097~Rab GTPase activator activity         | 4  | 0.7889546351084813 | 1044:38:00 | 638:57:00  | 01:00:00   | 960:52:00  |
| KEGG_PATHWAY  | mmu04320:Dorso-ventral axis formation            | 3  | 0.591715976331361  | 251:53:00  | 914:02:00  | 758:47:00  | 572:55:00  |
| GOTERM_CC_FAT | GO:0005624~membrane fraction                     | 20 | 3.944773175542406  | 35:48:00   | 628:01:00  | 861:51:00  | 315:42:00  |
| INTERPRO      | IPR000504:RNA recognition motif, RNP-1           | 10 | 1.9723865877712032 | 311:40:00  | 250:08:00  | 01:00:00   | 622:59:00  |
| GOTERM_MF_FAT | GO:0042805~actinin binding                       | 2  | 0.3944773175542406 | 1046:38:00 | 1095:56:00 | 01:00:00   | 350:52:00  |
| INTERPRO      | IPR015447:Neurexin                               | 2  | 0.3944773175542406 | 256:21:00  | 663:02:00  | 01:00:00   | 777:40:00  |
| INTERPRO      | IPR000633:Vinculin, conserved site               | 2  | 0.3944773175542406 | 256:21:00  | 663:02:00  | 01:00:00   | 777:40:00  |
| INTERPRO      | IPR019578:Serine-threonine phosphatase 2A,       | 2  | 0.3944773175542406 | 256:21:00  | 663:02:00  | 01:00:00   | 777:40:00  |
| INTERPRO      | IPR000009:Protein phosphatase 2A, regulatory     | 2  | 0.3944773175542406 | 256:21:00  | 663:02:00  | 01:00:00   | 777:40:00  |
| INTERPRO      | IPR018067:Protein phosphatase 2A, regulatory     | 2  | 0.3944773175542406 | 256:21:00  | 663:02:00  | 01:00:00   | 777:40:00  |
| INTERPRO      | IPR019573:Serine/threonine-protein phosphat      | 2  | 0.3944773175542406 | 256:21:00  | 663:02:00  | 01:00:00   | 777:40:00  |
| INTERPRO      | IPR000778:Cytochrome b245, heavy chain           | 2  | 0.3944773175542406 | 256:21:00  | 663:02:00  | 01:00:00   | 777:40:00  |
| INTERPRO      | IPR001033:Alpha-catenin                          | 2  | 0.3944773175542406 | 256:21:00  | 663:02:00  | 01:00:00   | 777:40:00  |
| INTERPRO      | IPR019316:G8 domain                              | 2  | 0.3944773175542406 | 256:21:00  | 663:02:00  | 01:00:00   | 777:40:00  |
| GOTERM_BP_FAT | GO:0006432~phenylalanyl-tRNA aminoacylatic       | 2  | 0.3944773175542406 | 571:14:00  | 1085:19:00 | 01:00:00   | 737:47:00  |
| GOTERM_BP_FAT | GO:0007019~microtubule depolymerization          | 2  | 0.3944773175542406 | 571:14:00  | 1085:19:00 | 01:00:00   | 737:47:00  |
| GOTERM_BP_FAT | GO:0001956~positive regulation of neurotransr    | 2  | 0.3944773175542406 | 571:14:00  | 1085:19:00 | 01:00:00   | 737:47:00  |
| GOTERM_BP_FAT | GO:0045600~positive regulation of fat cell diffe | 2  | 0.3944773175542406 | 571:14:00  | 1085:19:00 | 01:00:00   | 737:47:00  |
| GOTERM_BP_FAT | GO:0016080~synaptic vesicle targeting            | 2  | 0.3944773175542406 | 571:14:00  | 1085:19:00 | 01:00:00   | 737:47:00  |
| SMART         | SM00303:GPS                                      | 4  | 0.7889546351084813 | 897:08:00  | 695:27:00  | 861:51:00  | 54:16:00   |

Supplementary Table S11: Human transcripts that might have a mouse homolog

|               |
|---------------|
| A2BP1         |
| ADAMTS6       |
| ANGPT1        |
| ARHGAP17      |
| ARHGAP6       |
| ASTN1         |
| ATP11B        |
| ATP8A2        |
| ATRNL1        |
| AUTS2         |
| BRCC3         |
| BRE           |
| CACNA2D1      |
| CACNA2D3      |
| CALN1         |
| CDH12         |
| CDH13         |
| CDH8          |
| CHM           |
| CNTN4         |
| CNTN5         |
| CNTNAP2       |
| COL22A1       |
| COL4A5        |
| CPEB4         |
| CPNE4         |
| CSMD1         |
| CSPP1         |
| CTNNA2        |
| DACH1         |
| DACH2         |
| DCC           |
| DLGAP1        |
| DMD           |
| DOCK4         |
| DPP10         |
| DYNC2H1       |
| EMR4          |
| EPHA3         |
| EXOC6B        |
| FAF1          |
| FAM19A1       |
| FARP1         |
| FAT3          |
| FBXL13/LRRC17 |
| FHIT          |
| FOXP1         |
| FRMPD4        |
| FRYL          |
| GABRB3        |
| GDPD4         |
| GRIA1         |
| GRIN2A        |
| GRM5          |
| GRM7          |

|          |
|----------|
| HIVEP1   |
| IL1RAPL2 |
| KCNIP4   |
| KCNQ5    |
| KLHL32   |
| LDB2     |
| LDLRAD3  |
| LPP      |
| LTBP1    |
| LUZP2    |
| MAGI2    |
| MDGA2    |
| MGA      |
| MKLN1    |
| MYO1D    |
| NEGR1    |
| NHS      |
| NIN      |
| NLGN1    |
| NOX4     |
| NRG3     |
| NRXN1    |
| NRXN3    |
| ODZ1     |
| ODZ2     |
| PAPPA2   |
| PARK2    |
| PCDH17   |
| PCDH9    |
| PCLO     |
| PGCP     |
| PLD5     |
| PLXDC2   |
| POLA1    |
| PRKG1    |
| PTPRD    |
| PTPRT    |
| RABGAP1L |
| RELN     |
| RGS7     |
| RIMS2    |
| ROBO2    |
| RUNX2    |
| SEC16B   |
| SEMA3E   |
| SLC25A21 |
| SLC35F1  |
| SLC39A10 |
| SLC39A11 |
| SMYD3    |
| SNTG2    |
| SORCS1   |
| SPAG16   |
| SPON1    |
| STAG1    |
| STK3     |
| STXBP5L  |
| SYT14    |

|         |
|---------|
| TBC1D23 |
| TRPC4   |
| TRPM3   |
| USH2A   |
| VPS13B  |
| WDR70   |
| XRCC4   |
| ZMAT1   |

## Supplemental table S12: Sequence identity analysis of human vs mouse KCNIP IV protein

KCNIP4 I (NP\_079497) ↓  
MNVRRVESISAQLEEASSTG**GFLYAQN**STKR**SIKERLMKLLPCSA**AKTSSPAI**QNS**VEDELEM  
ATVRHRP EALELLEAQS**KFTK**KELQILYRG**FKNE**CP**SGVVNEET**TFKEIYS**QFFPQGD**STTYAH  
FLFNAFDTDHNGAV SF**EFIKGLSILLR**GT**VQEKLN**WAFNLYDINKDGYITKEEMLDIMKAIY  
DMMGKCTYPVLKEDAPRQHVE TFF**QMDKNK**DGVV**TIDEFIE**SCQK**DENIMRSMQLFENV** I

mKCNIP4 A (AAH51130) ↓  
MNVRRVESISAQLEEASSTG**GFLYAQN**NTKR**SIKERLMKLLPCSA**AKTSSPAI**QNS**VEDELEM  
ATVRHRPEALELLEAQS**KFTK**KELQILYRG**FKNE**CP**SGVVNEET**TFKEIYS**QFFPQGD**STTYAH  
FLFNAFDTDHNGAVSFEDFI**KGLSILLR**GT**VQEKLN**WAFNLYDINKDGYITKEEMLDIMKAIY  
DMMGKCTYPVLKEDAPRQHVETFF**QKMDKNK**DGVV**TIDEFIE**SCQK**DENIMRSMQLFENV** I

### KCNIP4 I and mKCNIP4 A 99% identities

KCNIP4 IV (NP\_671712)  
MNLEGLEMIAVLIVIVL**FVKLLEQFGLIEAGLE****DS**VEDELEMATVRHRPEALELLEAQS**KFTK**  
**KELQILY RGFKE**CP**SGVVNEET**TFKEIYS**QFFPQGD**STTYAHFLFNAFDTDHNGAVSFEDFI**K**  
**GLSILLRGT**V**QEKLN**WAFNLYDINKDGYIT**KEMLDIMKAI**YDMMGKCTYPVLKEDAPRQHVE  
**TF****QKMDKNK**DGVV**TIDEFIE** SC**QK****ENIMRSMQLFENV** I

mKCNIP4 C (NP\_084541)  
MNLEGLEMIAVLIVIVL**FVKLLEQFGLIEAGLE****DS**VEDELEMATVRHRPEALELLEAQS**KFTK**  
**KELQILYRGFKNE**CP**SGVVNEET**TFKEIYS**QFFPQGD**STTYAHFLFNAFDTDHNGAVSFEDFI**K**  
**GLSILLRGT**V**QEKLN**WAFNLYDINKDGYIT**KEEMLDIMKAI**YDMMGKCTYPVLKEDAPRQHVE  
**TF****QKMDKNK**DGVV**TIDEFIE**SC**QK****DENIMRSMQLFENV** I

### KCNIP4 IV and mKCNIP4 C 100% identities
